# Supplementary material for: Coding Gene Single Nucleotide Polymorphism Mapping and Quantitative Trait Loci Detection for Physiological Reproductive Traits in Brook Charr,Salvelinus fontinalis
Source: Oxford University Press journal article supplement (doi:10.1534/g3.111.001867), 2012-03-01
Supplement: 379_001867si.pdf [file 379_001867si.pdf]

### Supporting Files

Files S1-S3 are available for download at <http://www.g3journal.org/lookup/suppl/doi:10.1534/g3.111.001867/-/DC1>.

File S1: R script containing all the commands necessary to run the analyses. Comments on commands are included in the file.

File S2 : Input file formatted for R/QTL package gathering all the genotypic and phenotypic information.

File S3 : Raw genotyping data for SSR and SNP markers used in the present study to build the linkage map.

**Table S1** Description of the SSR markers used to build the linkage map in the Brook charr, *Salvelinus fontinalis*

| Marker              | Primer F et R                                     | Annealing Temperature | Accession Number | Associated publication |
|---------------------|---------------------------------------------------|-----------------------|------------------|------------------------|
| 1 BHMS206           | CCAATAACTGACAAGTGAG<br>CAGAGGTTGATAATGGGG         | 54                    | AF256680         | Timusk et al. 2011     |
| 2 BHMS238           | GATAATGCCTGGATGTGC<br>CTAGAGCCGACCCTTAC           | 54                    | AF256682         | Timusk et al. 2011     |
| 3 BHMS272           | AGCTTGACAGCAGCTTGG<br>TGCAATGCAGACTGACTG          | 54                    | AF256690         | Timusk et al. 2011     |
| 4 BHMS331           | CAGCACCAGAACATAACC<br>AGCCATCAACACTCCCTG          | 54                    | AF256744         | Timusk et al. 2011     |
| 5 BHMS377           | TGGCTACAACAGGGATAC<br>AGTCTCTTACATGGAGGC          | 54                    | AF256707         | Timusk et al. 2011     |
| 6 BHMS417/i/ii/iii/ | ACATAGACCATGACGCTC<br>TGACACGCTCTCTGATCC          | 54                    | AF256752         | Timusk et al. 2011     |
| 7 BHMS429           | CCCCTGTCAAACGTCTTC<br>AGCACACTGGATTCAAGG          | 54                    | AF256719         | Thorsen et al., 2005   |
| 8 BHMS465/i/ii      | ACTCATCAACTGAGCCCC<br>GTGATCTGTAGTTTTCCATC        | 54                    | AF256857         | Timusk et al. 2011     |
| 9 BHMS7.011         | GGGACAGCTAATGGATCG<br>GTTTTAGTAATCGGAGTGTG        | 54                    | AF256834         | Timusk et al. 2011     |
| 10 BX073647/i/ii    | TATGGCTTTCCAAACAAAG<br>ACAGGGGGTTAACAGTGACA       | 54                    | BX073647         | Timusk et al. 2011     |
| 11 BX073974         | TGTACGGAAAGATGGGCTCC<br>CTCGAAGTACCCAAACAGC       | 54                    | BX073974         | Timusk et al. 2011     |
| 12 BX076085         | AAGACAGGAGATGAAGACACCG<br>ATATGTCGTGGGAAACATGTAGG | 54                    | BX076085         | Timusk et al. 2011     |
| 13 BX079862         | TGTGAGAAGAACACGAGAGTTGG                           | 54                    | BX079862         | Timusk et al. 2011     |

|    |               |                          |    |          |                    |
|----|---------------|--------------------------|----|----------|--------------------|
|    |               | GAATGAGGTGTTAGAACGACTGC  |    |          |                    |
| 14 | BX087664/i/ii | ATAGCCAGAGGGAAGCCTGC     | 54 | BX087664 | Timusk et al. 2011 |
|    |               | GCATCTCCAGCAGTCATTTGG    |    |          |                    |
| 15 | BX299451      | CCTGGTCTCCTTCACTTCA      | 54 | BX299451 |                    |
|    |               | CTGTGCTTACTGGGCAACTT     |    |          |                    |
| 16 | BX305863      | TACTGTACAGGATGGGTCTCTGC  | 54 | BX305863 | Timusk et al. 2011 |
|    |               | GGAGTACTACGTGTGAGGATTGG  |    |          |                    |
| 17 | BX311224      | CCGTGTGAAACCTGCATCC      | 54 | BX311224 | Timusk et al. 2011 |
|    |               | CCTTGGAAATGCTTACCCTACC   |    |          |                    |
| 18 | BX311884/i/ii | TGGACAACCTCAGCAAGGACC    | 54 | BX311884 | Timusk et al. 2011 |
|    |               | TGGTGACAGTTTCTGCTGAACC   |    |          |                    |
| 19 | BX313739      | CATGGAGTGTAAGGCAGGGC     | 54 | BX313739 | Timusk et al. 2011 |
|    |               | CGACAGATCAGCATCGCTGC     |    |          |                    |
| 20 | BX318599      | GATTTTCTGACCAGCACCTCC    | 54 | BX318599 | Timusk et al. 2011 |
|    |               | CCAACTGGACCCAGAACAGC     |    |          |                    |
| 21 | BX319197      | CGTCATCCATGTATGTTTCATGC  | 54 | BX319197 | Timusk et al. 2011 |
|    |               | GACAACCTCACATCCACATGG    |    |          |                    |
| 22 | BX319411/i/ii | GCTGTGGCCCTCTGTCATAACC   | 54 | BX319411 | Timusk et al. 2011 |
|    |               | GACATCAACGTGACACCAGGC    |    |          |                    |
| 23 | BX861121/i/ii | CCTTCATCAAGGATGCAGCC     | 50 | BX861121 | Timusk et al. 2011 |
|    |               | TATGTTTCCCAGTACATACCGGG  |    |          |                    |
| 24 | BX870052/i/ii | CAGATGAAATTGATCCAGATGACG | 54 | BX87005  | Timusk et al. 2011 |
|    |               | GGAAGGGGATGATGTGATTGG    |    |          |                    |
| 25 | BX873441      | GAAGAGTTCCGGTCCATCGG     | 54 | BX873441 | Timusk et al. 2011 |
|    |               | CGTGCATGTAATTCAGCCTGC    |    |          |                    |
| 26 | BX881655      | AGAAAGACCTGGCAAGGACC     | 54 | BX881655 | Timusk et al. 2011 |
|    |               | CCTCTGGCACAACTCCAGC      |    |          |                    |
| 27 | BX890355/i/ii | ACTGAGAACAACCTTCAGCCAAGG | 54 | BX890355 | Timusk et al. 2011 |

---

|    |               |                                                                        |    |          |                      |
|----|---------------|------------------------------------------------------------------------|----|----------|----------------------|
| 28 | CA060381      | ACCCACTAGCTGCTACATTATGG<br>AGTGGTGAAGTGGGATGGGG<br>CCCGATGCTTTCTTCATGG | 54 | CA060381 | Rise et al., 2004    |
| 29 | CA061336      | TGCCATGTTTATTGAAATGCC<br>GGATCCAAAGGAGAGACTCCTG                        | 52 | CA061336 | Rise et al., 2004    |
| 30 | CA344270      | CACACTTCCTGGACCACTTCC<br>TTCAAACTAGGGATTTCTGTTGC                       | 54 | CA344270 | Rexroad et al., 2003 |
| 31 | CA345149      | ACCACCTCAGAGTGTCTTTCTCC<br>GACTTGACATACAAACGACGTGG                     | 54 | CA345149 | Rexroad et al., 2003 |
| 32 | CA350064      | GACCTGGTTTCGGTGCAGAGC<br>CCACTGTGAAGTTAGGTGTTCCC                       | 54 | CA350064 | Rexroad et al., 2003 |
| 33 | CA368462/i/ii | CGACAGACTCAGACCACTGTCC<br>CGACAGACTCAGACCACTGTCC                       | 56 | CA368462 | Rexroad et al., 2003 |
| 34 | CA376300/i/ii | TTAAGCACTAAGGGGAAGACGG<br>TGGGGTGAAGCAAAGAGC                           | 54 | CA376300 | Rexroad et al., 2003 |
| 35 | CA378164      | GAACGGGGTGTCTAGATGG<br>CCCTGACCTGCCTCTTTGG                             | 54 | CA378164 | Rexroad et al., 2003 |
| 36 | CL4778        | GAGGATACTGCCATTCAACA<br>ACGGTCCCACCTTACCATAAA                          | 54 | NA       |                      |
| 37 | Clock3-7C2-3  | GAGTACTGCCCTGCAGGTTG<br>TTGACCATGGCCCTTATG                             | 54 | NA       | Timusk et al. 2011   |
| 38 | CR363293      | TCCGCAACAAGTACGCTGG<br>TTCTCTTCTGGCAACTTCAGACC                         | 54 | CR363293 | Timusk et al. 2011   |
| 39 | Ogo4UW        | GTCGTCCTGGCATCAGCTA<br>GAGTGGAGATGCAGCCAAAG                            | 54 | AF009796 | Olsen et al., 1998   |
| 40 | Omi30TUF/i/ii | AGAAGACGAAGTGGATGCTG<br>GTCACCGTTTCTTTACCTGC                           | 54 | NA       | Timusk et al. 2011   |

---

|    |              |                                                     |    |          |                       |
|----|--------------|-----------------------------------------------------|----|----------|-----------------------|
| 41 | Omi126TUF    | TTAAAGGAAACACACGCATACG<br>TTCACACGACCGTTGGTG        | 54 | NA       | Timusk et al. 2011    |
| 42 | Omi179TUF    | TTATCCTAGTGCCGGGTCTG<br>ATGCAGCTTTTCAGTGGCTT        | 54 | NA       | Timusk et al. 2011    |
| 43 | OkeSLINRA    | GAAAATAACTATAGACATTGCTGG<br>CGTCCTTACACTCCAGAGGG    | 54 | NA       | Sakamoto et al., 2000 |
| 44 | OMM1195      | GCGAGGTTAGGATACACACAT<br>CTTCAGCCTGGAAACACAA        | 54 | AF469980 | Timusk et al. 2011    |
| 45 | OMM1197/i/ii | CTAGGAGAACAAGAAGACCATCGC<br>AGGACAGAAAGGAGGTAAAACGG | 54 | AF469982 | Timusk et al. 2011    |
| 46 | OMM1201      | CCGAAAAGCTAGGGAGAG<br>CCCTTCTGTATCCATTCCGTT         | 54 | AF469986 |                       |
| 47 | OMM1205      | AAACGGTGCCTCCTCCTCTATA<br>CCCAAGCCAATAAAGCCCTTACAT  | 54 | AF469990 | Timusk et al. 2011    |
| 48 | OMM1210      | CATCAGACAGCACAGAGCAG<br>GGAGGAGCAAGCCTTCTAAC        | 54 | AF469994 | Timusk et al. 2011    |
| 49 | OMM1211      | ACCCACTCTCCACTCAGTATT<br>GAAGGAGGCTTGAAGTGATC       | 54 | AF469995 | Timusk et al. 2011    |
| 50 | OMM1220      | CTCTGGGACAGACTTATCAC<br>CTATTGGACGATGCACAC          | 54 | AF470002 | Timusk et al. 2011    |
| 51 | OMM1228      | CCCTTCTGTGTGTCGTTGTT<br>CAGGAGTCACTTGGCAGTAGGAG     | 54 | AF470009 | Timusk et al. 2011    |
| 52 | OMM1237/i/ii | GTCAGAGTCGTGGGTATCAA<br>CAGAGTTTCCACGGTCACT         | 54 | AF470017 | Timusk et al. 2011    |
| 53 | OMM1238      | CGGAAATACGGAGGCTACTGTTG<br>CTTCTCCCTGGCATCTTTCATCAG | 54 | AF470018 | Timusk et al. 2011    |
| 54 | OMM1263/i/ii | CTGCATTCCAATACTCCACAG<br>TGGACGAACACTGGATCAG        | 54 | AF470029 | Timusk et al. 2011    |

|    |              |                                                        |    |          |                        |
|----|--------------|--------------------------------------------------------|----|----------|------------------------|
| 55 | OMM1290      | GCCTCAGCACTGTCTTAA<br>CGGAGGTCCTAGAGA                  | 54 | AF470050 | Timusk et al. 2011     |
| 56 | OMM1329      | GGGAAGTGTTACCATTACACAAG<br>CATCCAGGAACGCACCTTTA        | 54 | G73564   | Palti, Y et al., 2002  |
| 57 | OMM1345      | CCCTGGATTCTCCTGTTAG<br>ACATAGACACAGCACTCATGG           | 54 | G73576   | Palti, Y et al., 2002  |
| 58 | OMM1372/i/ii | CACTTCATGATGCCGAAAGCAG<br>CCCCATCATGACTCCTTCTAGTT      | 54 | BV005159 | Palti, Y et al., 2002  |
| 59 | OMM1445      | CTGCGTTATTGGTAGCTTGTG<br>CCCGGTAATGTAGTTCCTGTC         | 54 | BV079589 | Timusk et al. 2011     |
| 60 | OMM1459      | GCAGGTATTCAGGTAGGTCAG<br>AATGACCATGGAAAACAACAC         | 54 | BV079593 | Timusk et al. 2011     |
| 61 | OMM1512      | TTTCAAATCAGCCCAGGTTA<br>AGGAAAAGGCAGGATGGTAT           | 54 | BV212048 | Coulibaly et al., 2005 |
| 62 | OMM1579      | CTAGGCTCTGTGAATCTGA<br>GAAGGAATAAGACTGTCCG             | 54 | BV212097 | Coulibaly et al., 2005 |
| 63 | OMM3015/i/ii | ACTCTTGCGCTGGTTGTATG<br>GAAGAGTGTGAAAGTTGGCTG          | 54 | BV718488 | Timusk et al. 2011     |
| 64 | OMM3075      | CATTTAATTGAGCTGGCCAC<br>CCAGACAGTTCTGAGCAACC           | 54 | BV676508 | Timusk et al. 2011     |
| 65 | OMM3095      | CTTCCATTGAGGTTAGAGCAC<br>CCAGGTGTGAAAGGGTTTG           | 54 | BV676517 | Timusk et al. 2011     |
| 66 | OMM5000/i/ii | AACAGAGCAGTGAGGGGACTGAGA<br>CAAGTGATGTTGGTGCGAGGG      | 54 | CO805106 | Timusk et al. 2011     |
| 67 | OMM5007      | AGATGCCTGTCGAGTGTG<br>GAGGAGCATCATTTAGAGACTACA         | 54 | CO805113 | Timusk et al. 2011     |
| 68 | OMM5008      | CTGTTTCGTTGCTCATATCAACC<br>TCCATTATCCAATCAGGAGAGCTCTAT | 54 | CO805114 | Timusk et al. 2011     |

|    |              |                                                          |    |          |                        |
|----|--------------|----------------------------------------------------------|----|----------|------------------------|
| 69 | OMM5014/i/ii | GGGTCTGAAAGGAGCATGG<br>GGAACCTAACATGACGCAACA             | 54 | CO805119 | Timusk et al. 2011     |
| 70 | OMM5018      | GAAGGAACGGAACAGAGTGGTAATCAC<br>TCGGACAGGTAACCTGGAACGGAT  | 54 | CO805123 | Timusk et al. 2011     |
| 71 | OMM5019      | CATGCTGCCTCTCACCGTTTA<br>AACACACCCAGCATCCAACC            | 54 | CO805124 | Timusk et al. 2011     |
| 72 | OMM5056      | TCACCATCACCTTCATCGCCT<br>ACATGCTGCCCTTTGACGGAG           | 54 | CA349207 | Rexroad et al., 2003   |
| 73 | OMM5060      | TCTCGGGCCAAACCTTCTTATTGC<br>AGCCACTACATCTCCACGCCCTT      | 54 | CA348688 | Rexroad et al., 2003   |
| 74 | OMM5061      | GCGTTGGGAGAGAACAATACC<br>CCCATCACACCAGTTGCC              | 54 | CA348688 | Rexroad et al., 2003   |
| 75 | OMM5074      | TCGCTTTGGGTAGAAGTTGCCTTTAAC<br>AACATTAAGAACGAGTGAATCACGC | 54 | CA348721 | Rexroad et al., 2003   |
| 76 | OMM5091      | GCAGGAAAAACACCCAGATACAA<br>ACACTGGCTGGTGTCTTACATTA       | 54 | CA348850 | Rexroad et al., 2003   |
| 77 | OMM5102/i/ii | ATTCAAATAACAGGTGCTACTGGTC<br>CTGGTAACTAGGCAACTGATTGTGTC  | 54 | CA348955 | Rexroad et al., 2003   |
| 78 | OMM5113      | TCGGTAACAAGTCTCTAGACCACA<br>CAGAGACCTAGACTGAGTCATGTCCTG  | 54 | CA349018 | Rexroad et al., 2003   |
| 79 | OMM5146      | GACAGATTCATGCAAGCCT<br>CCTCACTACTTGCCAATCA               | 54 | BV211874 | Coulibaly et al., 2005 |
| 80 | OMM5147      | CACTGTATGTTCTTACCCTG<br>TATACTGGCTGAGTTCAACC             | 54 | BV211875 | Coulibaly et al., 2005 |
| 81 | OMM5155i/ii  | GGACAGAACTGCCACTAAGTGTG<br>GAGGAGACAGGGAAGAGCTATTG       | 54 | BV211883 | Coulibaly et al., 2005 |
| 82 | OMM5161/i/ii | CAAGTGCCTTTGAGCAC<br>AGCAACTGCTGACTCC                    | 54 | BV211889 | Coulibaly et al., 2005 |

|    |                    |                                                      |    |          |                        |
|----|--------------------|------------------------------------------------------|----|----------|------------------------|
| 83 | OMM5176            | CCACTTGCTGCTTCTCTACATA<br>AAGAACACCTAGCCAATAACCC     | 54 | BV211902 | Coulibaly et al., 2005 |
| 84 | OMM5179            | CCCTGTCACATGGATGCT<br>GATTTGGCAACCGAACAC             | 54 | BV211905 | Coulibaly et al., 2005 |
| 85 | OMM5312/i/ii/iii   | ACTGTCAGCAGCAATACACT<br>CCCATTTTCTCTTGTCACAC         | 54 | BV21202  | Coulibaly et al., 2005 |
| 86 | Omy6DIAS           | CCACCAACTTCTTACATGAT<br>CTATGGGGACAGCCGAATAA         | 54 | AF239042 | Timusk et al. 2011     |
| 87 | Omy21INRA/i/ii/iii | GCATTGGCGTAATGAGAAGG<br>CTGACGGACATATCAGCCC          | 54 | NA       | Gharbi et al., 2006    |
| 88 | OmyRGT2TUF         | ATAATGTGTCCCAGGCAAG<br>GAGGATGCGTCTTTGCATCT          | 54 | AB087587 | Sakamoto et al., 2000  |
| 89 | OmyRT16TUF         | TGGCTGAGTTATACATGGAACG<br>TCAATCAGGAGCAGTTAAAACA     | 54 | NA       | Timusk et al. 2011     |
| 90 | Otsclock1b_44_L_2  | TGCTACTGTGGCAACCTTTG<br>CCTGAGAGAGATGAGGGAGAGA       | 54 | NA       |                        |
| 91 | Sal5UoG            | TTTGCATTGAGCCTCTGTTG<br>TGTTTCAGCTGCTATTAGGAAT       | 54 | NA       | Timusk et al. 2011     |
| 92 | Sal9UoG/i/ii/iii   | TCACTGCTTCAAGGTATTTTACTT<br>AATTAGAGCTGCTAGGTCAGTGAG | 54 | NA       | Timusk et al. 2011     |
| 93 | SalD25SFU          | GATCTACACAGACCCACC<br>CCGTTCTTCCAATAACTGCTC          | 54 | AF537305 | McGowan et al., 2004   |
| 94 | SalD39SFU          | GGGGAGTCTGTGTTAAGTTGG<br>TGAATGGACGTTCTCTGAC         | 54 | AF537310 | McGowan et al., 2004   |
| 95 | SalE38SFU          | CGCCTTGCATACATTACACC<br>CCGTTCTTCCAATAACTGCTC        | 54 | AF537309 | McGowan et al., 2004   |
| 96 | SalF41SFU          | ATCCGCTATGAACCACAGG<br>ACTGCTCCGGCAACTACAG           | 54 | AF537306 | McGowan et al., 2004   |



|     |                  |                                                   |    |          |                       |
|-----|------------------|---------------------------------------------------|----|----------|-----------------------|
| 97  | Ssa0017BSFU      | CGCAACAGGCTTAGTTAGAT<br>CAACATTGAGTTCCCTTCAT      | 54 | AF019154 | Timusk et al. 2011    |
| 98  | Ssa0033BSFU      | ATTCTTGATCGTGGTCTTTG<br>CCGTTCTTCCAATAACTGCTC     | 54 | NA       | Phillips et al., 2009 |
| 99  | Ssa0072BSFU      | TCCGAAGATAGGGGAGGTT<br>ATAAACATCTGGGTGGCTGC       | 54 | NA       | Phillips et al., 2009 |
| 100 | Ssa0080BSFU/i/ii | CTACTGCACAGCACCTGGAA<br>CACAGAGCACCTCCTGAACA      | 54 | NA       | Phillips et al., 2009 |
| 101 | TC126859j/ii     | TTTTCTCCCTTTGACGACAG<br>TGGTTGTGACTCGATGTCTG      | 54 | NA       | Phillips et al., 2009 |
| 102 | C113             | GGAGCCCAGACTATATTGACG<br>CCTTGAAGTCTTGCCAGAT      | 64 | NA       | King TL, unpublished  |
| 103 | B52              | GCACACGAAACCAGTATATTTT<br>TTGTCTTGGTGATTTGAGAGC   | 64 | NA       | King TL, unpublished  |
| 104 | C28              | CAGTTGAAGTGATTGGGTTAGC<br>TCATCCTTAAAGCAGAATACCAC | 64 | NA       | King TL, unpublished  |
| 105 | C129             | AGTGGGTACAACATACCTTTGG<br>AGGTATTCACACCTCAGATTGG  | 64 | NA       | King TL, unpublished  |
| 106 | C88              | TAGTCTCTGGTGGGAATAATG<br>ATATCAGCCATAAGAGCTGGAG   | 60 | NA       | King TL, unpublished  |
| 107 | C24              | GCTACTGTTGGATTTATCTCAG<br>ATCACAGAGATGGGGTGATG    | 60 | NA       | King TL, unpublished  |
| 108 | D100             | ACCTTTGACCTGTACATCGTG<br>CAGACCTAGACTAAAGCATCCG   | 60 | NA       | King TL, unpublished  |
| 109 | D75              | GTAGTGCCAAAACAGGTAGAGC<br>CATCCTTATTCCAACCTCAATC  | 60 | NA       | King TL, unpublished  |
| 110 | C86              | ACCGATGGCCTTCAACAC<br>ATAGGCCCTACCTCAAACC         | 60 | NA       | King TL, unpublished  |

|     |         |                                                 |    |    |                        |
|-----|---------|-------------------------------------------------|----|----|------------------------|
| 111 | Sfo266  | CTGGCAGCATTGTAAAGAAG<br>CTGGGTGATTTGACGACC      | 64 | NA | Perry et al., 2005     |
| 112 | Sco216  | CCTTGTGAGAGCTAAGGTAGTG<br>GGAGGACATATTCCAACTTTG | 64 | NA | Dehaan and Ardren 2005 |
| 113 | Sfo262  | CCCATGTCAGTATTGGACTC<br>CTTCATGGGCAGAATGGAC     | 64 | NA | Perry et al., 2005     |
| 114 | Sco218  | TTCTAACTGTTGGCACTCTG<br>GTGTGGTTGGGTGGTAAG      | 60 | NA | Dehaan and Ardren 2005 |
| 115 | SFO241  | CTCCATTAGAAAGGGTTTG<br>CCAGTCTTTAGTCAACGC       | 60 | NA | King TL, unpublished   |
| 116 | SFO091  | AAATAACAACAATATGTGAGAAC<br>TATGCTGATATTGACTTTGG | 60 | NA | King TL, unpublished   |
| 117 | SFO308  | CAGCAATGGGGCTGAAGTAG<br>GTCACTGTGTGAATCCTCC     | 60 | NA | Perry et al., 2005     |
| 118 | SFO269  | GTAGATGAAACCTGATGG<br>GTTCTATGGTCACATACTG       | 60 | NA | Perry et al., 2005     |
| 119 | SFOD105 | CAGGGAAAATGCTAATGTGC<br>GGTTGTGTCGAATGGAGTTC    | 60 | NA | King TL, unpublished   |
| 120 | Ssa85   | AGCTGGGCCTCCAAGCTAC<br>ACCCGCTCCTCACTTAATC      | 60 | NA | King TL, unpublished   |
| 121 | SFOC115 | CAGTTTCTATCTCCAGGCAATC<br>TTCTGAAAGCACTCAACATGG | 60 | NA | King TL, unpublished   |
| 122 | SSA197  | GGGTTGAGTAGGGAGGCTTG<br>TGGCAGGGATTTGACATAAC    | 60 | NA | O'Reilly et al., 1996  |
| 123 | SFO12   | GGTTTTGAAGAGTGACAG<br>CCCGTTTCACAATCAGAG        | 60 | NA | Angers et al., 1995    |
| 124 | SFO177  | CGAATGTGGAGCTGAACTG<br>GGGTATTTGTACAATGGGT      | 60 | NA | Perry et al., 2005     |

|     |        |                                                   |    |    |                       |
|-----|--------|---------------------------------------------------|----|----|-----------------------|
| 125 | ONE8   | AACATTCTGGGATGACAGGGGTA<br>CTGTTCTGCTCCAGTGAAGTGG | 60 | NA | Scribner et al., 1996 |
| 126 | SFO226 | GAGGGCTAGAGACTAGCTTCAG<br>GCAGTGGAAACAATACCCAG    | 60 | NA | Perry et al., 2005    |

McGowan, CR, Davidson, EA, Woram, RA, Danzmann, RG, Ferguson, MM and Davidson, WS, 2004. Ten polymorphic microsatellite markers from Arctic charr (*Salvelinus alpinus*): linkage analysis and amplification in other salmonids *Anim. Genet.* 35:479-481.

Olsen, JB, Bentzen, P, and Seeb, JE, 1998. Characterization of seven microsatellite loci derived from pink salmon. *Mol. Ecol.* 7: 1087-1089

O'Reilly P, Hamilton L, McConnell S, Wright J (1996). Rapid analysis of genetic variation in Atlantic salmon (*Salmo salar*) by PCR multiplexing of dinucleotide and tetranucleotide microsatellites. *Canadian Journal of Fisheries and Aquatic Sciences* 53: 2292-2298.

Phillips, RB, Keatley, KA, Morasch, MR, Ventura, AB Lubieniecki, KP, Koop, BF, Danzmann, RG and Davidson, WS, 2009. Assignment of Atlantic salmon (*Salmo salar*) linkage groups to specific chromosomes: Conservation of large syntenic blocks corresponding to whole chromosome arms in rainbow trout (*Oncorhynchus mykiss*) *BMC Genetics* 10:46

Palti, Y, Fincham, MR and Rexroad, CE, III, 2002. Characterization of 38 polymorphic microsatellite markers for rainbow trout (*Oncorhynchus mykiss*). *Mol. Ecol. Notes.* 2: 449-452

Perry GML, King TL, St-Cyr J, Valcourt M, Bernatchez L 2005. Isolation and cross-familial amplification of 41 microsatellites for the brook charr (*Salvelinus fontinalis*). *Molecular Ecology Notes* 5(2): 346-351.

Rexroad, CE, III, Lee, Y, Keele, JW, Karamycheva, S, Brown, G, Koop, B, Gahr, SA, Palti, Y, and Quackenbush, J. 2003. Sequence analysis of a rainbow trout cDNA library and creation of a gene index. *Cytogenet. Genome Res.* 102: 347-354

Rise, ML, von Schalburg, KR, Brown, GD, Mawer, MA, Devlin, RH, Kuipers, N, Busby, M, Beetz-Sargent, M, Alberto, R, Gibbs, AR, Hunt, P, Shukin, R, Zeznik, JA, Nelson, C, Jones, SR, Smailus, DE, Jones, SJ, Schein, JE, Marra, MA, Butterfield, YS, Stott, JM, Ng, SH, Davidson, WS and Koop, BF, 2004. Development and application of a salmonoid EST database and cDNA microarray: data mining and interspecific hybridization characteristics. *Genome Res* 14:478-490

Sakamoto, T, Danzmann, RG, Gharbi, K, Howard, P, Ozaki, A, Sokkean, K, Woram, RA, Okamoto, N, Ferguson, MM, Holm, L-E, Guyomard, R and Hoyheim, B, 2000. A microsatellite linkage map of rainbow trout (*Oncorhynchus mykiss*) characterized by large sex-specific differences in recombination rates. *Genetics* 155:1331-1345.

Scribner KT, Gust JR, Fields RL (1996). Isolation and characterization of novel salmon microsatellite loci: cross-species amplification and population genetic applications. *Can J Fish Aquat Sci* 53: 833-841.

Timusk, E. R., M. Ferguson, H. K. Mogahadam, J. D. Norman, C. Wilson *et al.*, 2011. Genome evolution in the fish family salmonidae: generation of a brook charr genetic map and comparisons among charrs (Arctic charr and brook charr) with rainbow trout. *BMC genetics* 68:12.

Thorsen, J, Zhu, B, Frengen, E, Osoegawa, K, de Jong, PJ, Koop, BF, Davidson, WS and Hoyheim, B, 2005. A highly redundant BAC library of Atlantic salmon (*Salmo salar*): an important tool for salmon projects. *BMC Genomics* 6:50

**Table S2 Description of the Sequenom panel used to genotype the SNP markers in the F2 progeny**

| Technology | Panel  | Marker Name   | Oligo_Forward      | Forward_oligo_Sequence          | Oligo_Reverse      | Reverse_Oligo_Sequence          | Oligo_Probe           | Probe_Sequence                 |
|------------|--------|---------------|--------------------|---------------------------------|--------------------|---------------------------------|-----------------------|--------------------------------|
| sequenom   | SEQ010 | sf000032_01CT | sf000032_01CT_GA_F | ACGTTGGATGGGCGTCCCTGTTGAATTATC  | sf000032_01CT_GA_R | ACGTTGGATGGGCACACCCTTCTTTATCAC  | sf000032_01CT_GA_Pa   | CTTTATCACACACACTATTACTG        |
| sequenom   | SEQ010 | sf000124_02CT | sf000124_02CT_AG_F | ACGTTGGATGGCCAGTTGCCTATAGATTC   | sf000124_02CT_AG_R | ACGTTGGATGGTCTCCCTTATTCCCTTTC   | sf000124_02CT_AG02_P  | CCTTATTCCCTTTCACCAGTTTGTAG     |
| sequenom   | SEQ010 | sf000178_01CT | sf000178_01CT_GA_F | ACGTTGGATGCTTGCCACTTTTCTGGTAG   | sf000178_01CT_GA_R | ACGTTGGATGCTTGCTGGGACAAACTGAG   | sf000178_01CT_GA_Pa   | GGGACAAACTGAGATACGA            |
| sequenom   | SEQ010 | sf000191_01AG | sf000191_01AG_GC_F | ACGTTGGATGGACCTCTGTTTTACCGTGAG  | sf000191_01AG_GC_R | ACGTTGGATGGGCACTTCTTTGTATTGTGG  | sf000191_01AG_GC02_Pa | CCACTTGATAGGCAGCCA             |
| sequenom   | SEQ010 | sf000228_01AC | sf000228_01AC_TA_F | ACGTTGGATGTACAACAATTGTTCCACCC   | sf000228_01AC_TA_R | ACGTTGGATGGTCCACAATCAACCACTG    | sf000228_01AC_TA_Pa   | TGCTCCAATCACAGGT               |
| sequenom   | SEQ010 | sf000327_02AC | sf000327_02AC_GA_F | ACGTTGGATGATGAGTGACAGACGAGCTAC  | sf000327_02AC_GA_R | ACGTTGGATGTGCCTTGGTAGTCTATTCTC  | sf000327_02AC_GA_Pa   | AAGACAAAGACTAACAAGTTAATTAC     |
| sequenom   | SEQ010 | sf000657_01CT | sf000657_01CT_TC_F | ACGTTGGATGTTTCACACACTGTTTCGAGGG | sf000657_01CT_TC_R | ACGTTGGATGCGGTTTTGAACCGATGAAGC  | sf000657_01CT_TC_Pa   | AAAAAATGTTTCGAGGGTTTCTATG      |
| sequenom   | SEQ010 | sf000679_01CT | sf000679_01CT_TC_F | ACGTTGGATGGGATATTTTAGTGACATCGG  | sf000679_01CT_TC_R | ACGTTGGATGCCAGTGTGACAAAGGTTATG  | sf000679_01CT_TC_Pa   | CATTGTAATATGTGTATGTAGGCCTAGTA  |
| sequenom   | SEQ010 | sf000810_03CT | sf000810_03CT_CT_F | ACGTTGGATGCCTAAACACAGAAACAAGGG  | sf000810_03CT_CT_R | ACGTTGGATGTGAAGTATGCAAGGAGGGAG  | sf000810_03CT_CT02_P  | GGCAAGGAGGGAGTTTATCACAGA       |
| sequenom   | SEQ010 | sf000878_01AG | sf000878_01AG_CT_F | ACGTTGGATGACGTTAGTTGGGTGCAAGGG  | sf000878_01AG_CT_R | ACGTTGGATGAACAACTAGGCTAGCTCCC   | sf000878_01AG_CT02_P  | CCCCTAGTTAACTCTGGAAAATAGGA     |
| sequenom   | SEQ010 | sf000891_02AC | sf000891_02AC_CA_F | ACGTTGGATGCAGAAATCCTACACTCGTCC  | sf000891_02AC_CA_R | ACGTTGGATGTCTTCTTTAAAGAGGCAGG   | sf000891_02AC_CA02_Pa | GGAGAGACGGAAGATTC              |
| sequenom   | SEQ010 | sf000961_01AC | sf000961_01AC_CT_F | ACGTTGGATGCCCTCAAGGATAGAAGAAC   | sf000961_01AC_CT_R | ACGTTGGATGACTGTAATACAGAAACCAGC  | sf000961_01AC_CT_P    | ACCCAGCTATTCTCTGAATGTACAATT    |
| sequenom   | SEQ010 | sf000970_01AC | sf000970_01AC_GA_F | ACGTTGGATGAGGAAGCGATGAGTTAGGAC  | sf000970_01AC_GA_R | ACGTTGGATGAAATGGCAACTCGTTGAGG   | sf000970_01AC_GA_Pa   | TAAACTCGTTGAGGGAGGGAGATA       |
| sequenom   | SEQ010 | sf001181_01CT | sf001181_01CT_GA_F | ACGTTGGATGTGTGCAAGTATCCACAGTTC  | sf001181_01CT_GA_R | ACGTTGGATGCAAACACACACAAACCCC    | sf001181_01CT_GA_Pa   | GTTCTGTTGGAGCATTG              |
| sequenom   | SEQ010 | sf001661_01AC | sf001661_01AC_GT_F | ACGTTGGATGTGCAATCCAGGGCTTGAAC   | sf001661_01AC_GT_R | ACGTTGGATGGGGTACTTCAGAGCCAAATG  | sf001661_01AC_GT02_P  | TGTGTTGGTTTCAGAGAAT            |
| sequenom   | SEQ010 | sf001740_01GT | sf001740_01GT_GA_F | ACGTTGGATGCCAAAGCCCAACAAAAAAGG  | sf001740_01GT_GA_R | ACGTTGGATGGAGTTTCTGAAAGTTTAC    | sf001740_01GT_GA_Pa   | TGAAAGTTCACATTAGACTCTAG        |
| sequenom   | SEQ010 | sf002175_02GT | sf002175_02GT_TC_F | ACGTTGGATGTGCCTGACATCTGAACTCTG  | sf002175_02GT_TC_R | ACGTTGGATGTTTTACAGTGGCGGAACGG   | sf002175_02GT_TC02_Pa | AGCGGAACGGGCCAATG              |
| sequenom   | SEQ010 | sf003063_01AC | sf003063_01AC_CA_F | ACGTTGGATGACCCTCAGCCTATCATATCC  | sf003063_01AC_CA_R | ACGTTGGATGGCAGTACCTACATTGTGTCC  | sf003063_01AC_CA_P    | GGTAGCAAATGTTGCTACAGCAACAATGAG |
| sequenom   | SEQ010 | sf003084_01AG | sf003084_01AG_AG_F | ACGTTGGATGCCATGGCTCTCTATAGAC    | sf003084_01AG_AG_R | ACGTTGGATGGCAATATGGGGTAACACAAG  | sf003084_01AG_AG_P    | CAGCATTACTGTTGTTACAATTAATGCATA |
| sequenom   | SEQ010 | sf003407_01AG | sf003407_01AG_TC_F | ACGTTGGATGTGCAGGCCATTCCAAAAAGC  | sf003407_01AG_TC_R | ACGTTGGATGCTGCCATTCTGAAGAAACG   | sf003407_01AG_TC02_Pa | CCTGAGCATGTTATTACCTGACAAGAA    |
| sequenom   | SEQ010 | sf003601_01GT | sf003601_01GT_CT_F | ACGTTGGATGGTAAAGTAGCTGGTGCCTTG  | sf003601_01GT_CT_R | ACGTTGGATGAGCCCCGGATTTATGTATGC  | sf003601_01GT_CT_P    | ACAGTAGCAACAAACCCCT            |
| sequenom   | SEQ010 | sf003621_01AC | sf003621_01AC_TC_F | ACGTTGGATGGAGCCATAGGTAATGTCCAG  | sf003621_01AC_TC_R | ACGTTGGATGCATTCTACCGGAGTGTAAAC  | sf003621_01AC_TC02_Pa | CCAACTCTGTTTGTAGATGTC          |
| sequenom   | SEQ010 | sf003698_01AT | sf003698_01AT_GT_F | ACGTTGGATGTTGTTGAAGGAAAGGCTG    | sf003698_01AT_GT_R | ACGTTGGATGAACACAGTGCCTTCTCACTC  | sf003698_01AT_GT_Pa   | TCTCACTCACCTAAAACAAAT          |
| sequenom   | SEQ010 | sf003713_01AG | sf003713_01AG_TA_F | ACGTTGGATGCGATTGAGACACATCTATGG  | sf003713_01AG_TA_R | ACGTTGGATGTAGATAGCAGATCTCGGAAG  | sf003713_01AG_TA_Pa   | CTACTCCACATGTGATGTTAAT         |
| sequenom   | SEQ010 | sf003724_01CG | sf003724_01CG_TC_F | ACGTTGGATGCTGGCTTTGCTTGTAAACCC  | sf003724_01CG_TC_R | ACGTTGGATGGGAAAAATCTGCATGGTTTAC | sf003724_01CG_TC_Pa   | CCCCCATCTGCATGGTTTACCCATTG     |

|          |        |               |                    |                                 |                    |                                |                       |                              |
|----------|--------|---------------|--------------------|---------------------------------|--------------------|--------------------------------|-----------------------|------------------------------|
| sequenom | SEQ010 | sf003897_01CT | sf003897_01CT_GA_F | ACGTTGGATGGGGAATCATAGGCAATGAGG  | sf003897_01CT_GA_R | ACGTTGGATGGGCGTAGTCGGTACTTTATG | sf003897_01CT_GA02_Pa | CCATACCTCCAGCTTGACT          |
| sequenom | SEQ010 | sf003919_01CT | sf003919_01CT_CT_F | ACGTTGGATGCAGTCCCTTGGTATAATGGC  | sf003919_01CT_CT_R | ACGTTGGATGGAATCCTGACCAGAGTAGTG | sf003919_01CT_CT_P    | ACTGACCAGAGTAGTGACCCAATT     |
| sequenom | SEQ010 | sf004030_01AG | sf004030_01AG_AT_F | ACGTTGGATGGAGGAAAGACAGTGGGAAAG  | sf004030_01AG_AT_R | ACGTTGGATGGGCTGGTCTAGCCTATTTAG | sf004030_01AG_AT_P    | TGGATTCAAACATGTGAGC          |
| sequenom | SEQ010 | sf004070_25AC | sf004070_25AC_GA_F | ACGTTGGATGCACAAATTTCTGGGTCTGGG  | sf004070_25AC_GA_R | ACGTTGGATGAGCTGTTAGCAGAAAGCTGG | sf004070_25AC_GA_Pa   | ATCAATCAATCACACTCACTT        |
| sequenom | SEQ011 | sf000071_02CT | sf000071_02CT_CA_F | ACGTTGGATGCAGATTAGGCCTAGACAACG  | sf000071_02CT_CA_R | ACGTTGGATGCACAGGTAAGAGTGTGC    | sf000071_02CT_CA_Pa   | GGACTAAGAGTGTGCTGAAATT       |
| sequenom | SEQ011 | sf000078_02AG | sf000078_02AG_AT_F | ACGTTGGATGAGGGAAAGGGTTTTAAGCGG  | sf000078_02AG_AT_R | ACGTTGGATGGCCACATTAACATACACCTG | sf000078_02AG_AT_P    | GACCTACAGAAGAAAATAAAATAAGC   |
| sequenom | SEQ011 | sf000137_01AG | sf000137_01AG_TA_F | ACGTTGGATGTTTCGAAACGCAATCACCGAG | sf000137_01AG_TA_R | ACGTTGGATGACTGAATTGACGGGATCAGC | sf000137_01AG_TA_Pa   | AGACATGGAGTCCTATACTAT        |
| sequenom | SEQ011 | sf000324_05AC | sf000324_05AC_CA_F | ACGTTGGATGTCTGGAAACTGCGTTCTACC  | sf000324_05AC_CA_R | ACGTTGGATGAGACAGCGGATTTGAGACAG | sf000324_05AC_CA_P    | GTCTCCACACTTTACTTCT          |
| sequenom | SEQ011 | sf000390_01AC | sf000390_01AC_TC_F | ACGTTGGATGCACAGGTATACTGTTGGTCTG | sf000390_01AC_TC_R | ACGTTGGATGACCATGGTACTCATGACTGG | sf000390_01AC_TC_Pa   | TGGAGGGCTTTGACAT             |
| sequenom | SEQ011 | sf000397_07CG | sf000397_07CG	CG_F | ACGTTGGATGTTGCCTGTTTGAGTGTGG    | sf000397_07CG	CG_R | ACGTTGGATGCAAAGACTAAACAACAGCCC | sf000397_07CG	CG_P    | GTTGAGCACCAACCACAA           |
| sequenom | SEQ011 | sf000428_01AT | sf000428_01AT_AT_F | ACGTTGGATGACCGTATGTATGCAGCCAG   | sf000428_01AT_AT_R | ACGTTGGATGCTGGACAATCTAAGCACTGG | sf000428_01AT_AT02_P  | ACATTAAGCATGGTAGGCTATATAA    |
| sequenom | SEQ011 | sf000584_01GT | sf000584_01GT_GA_F | ACGTTGGATGGGGACTCCACACATTACAAA  | sf000584_01GT_GA_R | ACGTTGGATGAACTAACAGTTAGCATGGTG | sf000584_01GT_GA_Pa   | GAGAAAAGCTGAACAAAGTAATTTTCTA |
| sequenom | SEQ011 | sf000854_01CT | sf000854_01CT_GT_F | ACGTTGGATGCGGTGTCTGCGATGATTTAG  | sf000854_01CT_GT_R | ACGTTGGATGTCTCCCTCCTCAATCTTC   | sf000854_01CT_GT02_P  | CACGTCGGCTCAGCATCA           |
| sequenom | SEQ011 | sf001086_01CT | sf001086_01CT_TC_F | ACGTTGGATGTACTGTCCAGCAACACTC    | sf001086_01CT_TC_R | ACGTTGGATGATTTACACCCAGGTCTAAC  | sf001086_01CT_TC_Pa   | TAACCCAGGTCTAACATACT         |
| sequenom | SEQ011 | sf001184_01CT | sf001184_01CT_TC_F | ACGTTGGATGTCTCTCAACAGCAAGAAGGG  | sf001184_01CT_TC_R | ACGTTGGATGCACTGCTCAGACGCTCTTTG | sf001184_01CT_TC02_Pa | CCAACACATTACTTGCTCATCAATATT  |
| sequenom | SEQ011 | sf001284_01AG | sf001284_01AG_GT_F | ACGTTGGATGGCTATTTCCCAAGTTTCTCTC | sf001284_01AG_GT_R | ACGTTGGATGCGGCCGTTCTTTAAATTACC | sf001284_01AG_GT_Pa   | CTTTTCTCAAAGCCACA            |
| sequenom | SEQ011 | sf001770_01AG | sf001770_01AG_AG_F | ACGTTGGATGAGGCACTGGTGTCTTTGTTT  | sf001770_01AG_AG_R | ACGTTGGATGTACGCTTAAGGTCTGG     | sf001770_01AG_AG_P    | TAAGGTCGGCCCTAT              |
| sequenom | SEQ011 | sf002024_02AC | sf002024_02AC_AG_F | ACGTTGGATGGCTATCTCTGGATAGAGAGG  | sf002024_02AC_AG_R | ACGTTGGATGCCTGTGTGTTGTACATGCG  | sf002024_02AC_AG_P    | TTGGCTCCAGTTATACTACCAC       |
| sequenom | SEQ011 | sf002033_01AG | sf002033_01AG_TA_F | ACGTTGGATGAGTTGAGGTTGGAGGAGTAG  | sf002033_01AG_TA_R | ACGTTGGATGGAACTACACTACTGTAC    | sf002033_01AG_TA_Pa   | GGAGTAGTGATTGTCTATTGG        |
| sequenom | SEQ011 | sf002155_01CT | sf002155_01CT_AG_F | ACGTTGGATGGTACCACCTTGATTGTCACG  | sf002155_01CT_AG_R | ACGTTGGATGATGAAGCCTGATATTCCAAC | sf002155_01CT_AG02_P  | CTCTTTTTAATCAAACATTCCATTGCA  |
| sequenom | SEQ011 | sf002948_01CG | sf002948_01CG_GT_F | ACGTTGGATGAAGGTCAGAGCAGTGTTC    | sf002948_01CG_GT_R | ACGTTGGATGATCTGAGCGGTAGATCTAGG | sf002948_01CG_GT02_P  | CGACTCAGAAACGTTGGT           |
| sequenom | SEQ011 | sf003141_03AC | sf003141_03AC_TA_F | ACGTTGGATGTGTTGGATGCCTTTGTTCCG  | sf003141_03AC_TA_R | ACGTTGGATGCTGACAGACTCCACTTTTCC | sf003141_03AC_TA02_Pa | AGTCCACTTTTCCAGCGCAT         |
| sequenom | SEQ011 | sf003197_01AG | sf003197_01AG_GA_F | ACGTTGGATGCAGAGCACCTATGATGTGAC  | sf003197_01AG_GA_R | ACGTTGGATGAGCCTCCTTTACGAGTTACC | sf003197_01AG_GA02_Pa | GGGGTACCTCCCCATTGTCCTGATTTC  |
| sequenom | SEQ011 | sf003589_01AC | sf003589_01AC_CT_F | ACGTTGGATGGCAGGGACACGAGTTATTTG  | sf003589_01AC_CT_R | ACGTTGGATGTTACACTACCACGTATGC   | sf003589_01AC_CT_P    | CCTAGTCACTTTAACCCCTA         |
| sequenom | SEQ011 | sf003610_01AT | sf003610_01AT_AT_F | ACGTTGGATGTAGCTGGGCGTGCTTAACTG  | sf003610_01AT_AT_R | ACGTTGGATGGACTCTGAGAACGTATACCG | sf003610_01AT_AT_P    | GGGTATACCGTAAACCCATTCCCCC    |
| sequenom | SEQ011 | sf003700_02GT | sf003700_02GT_TC_F | ACGTTGGATGGCGGTGACTATACTGTTGTG  | sf003700_02GT_TC_R | ACGTTGGATGTACAATCGACCGAGAGCATC | sf003700_02GT_TC_Pa   | AGACCGAGAGCATCTCATTATAC      |
| sequenom | SEQ011 | sf003728_02AT | sf003728_02AT_TC_F | ACGTTGGATGAACCAGCCTATCAAGTGGTC  | sf003728_02AT_TC_R | ACGTTGGATGACAACAGGAACAGCATCCAG | sf003728_02AT_TC02_Pa | ACAGCATCCAGACTGAACATAG       |
| sequenom | SEQ011 | sf003836_01CT | sf003836_01CT_TA_F | ACGTTGGATGGAGGTTTCTACTGTCACTG   | sf003836_01CT_TA_R | ACGTTGGATGCGACTGCAACTGAAAGCAAC | sf003836_01CT_TA_Pa   | AAACTGAAAGCAACATGGGCATGC     |

|          |        |               |                    |                                 |                    |                                |                       |                                 |
|----------|--------|---------------|--------------------|---------------------------------|--------------------|--------------------------------|-----------------------|---------------------------------|
| sequenom | SEQ011 | sf004064_01AT | sf004064_01AT_CA_F | ACGTTGGATGGAACACAGTGGTCTCCATAG  | sf004064_01AT_CA_R | ACGTTGGATGCACATGCCACCCAATATGAG | sf004064_01AT_CA02_Pa | AGTATAATAAACTAGGACTAATAGACTA    |
| sequenom | SEQ011 | sf004112_01AC | sf004112_01AC_AG_F | ACGTTGGATGATATGGCCTGTTGAAGTGGG  | sf004112_01AC_AG_R | ACGTTGGATGCAGACAGGATTAGGAACGAC | sf004112_01AC_AG_P    | ACTCATCTAAACGCTCC               |
| sequenom | SEQ011 | sf004602_04AG | sf004602_04AG_GA_F | ACGTTGGATGAAAGAGACAGTTCTGCCTCC  | sf004602_04AG_GA_R | ACGTTGGATGCTAGGAATGCTTACTGTGAC | sf004602_04AG_GA02_Pa | TGGCCTCCATTACCTCAAAG            |
| sequenom | SEQ011 | sf006081_01AT | sf006081_01AT_GT_F | ACGTTGGATGCGTGGCGGATAGAATTAATCT | sf006081_01AT_GT_R | ACGTTGGATGGTCAGGGCATAGCACTTTTC | sf006081_01AT_GT_P    | TTCCCGCCTTACATCAAAGTTACCTGAA    |
| sequenom | SEQ012 | sf000023_02AC | sf000023_02AC_TC_F | ACGTTGGATGCAAACGTGATATCTGTCCCC  | sf000023_02AC_TC_R | ACGTTGGATGAGTCCCCAGTCAAAGTGAAG | sf000023_02AC_TC_Pa   | TTCCAATAATGGTCAGAATCA           |
| sequenom | SEQ012 | sf000179_01AC | sf000179_01AC_TC_F | ACGTTGGATGACAGCGGAGGAGATTTGTTT  | sf000179_01AC_TC_R | ACGTTGGATGACCTGCATTGACACAGATGG | sf000179_01AC_TC_Pa   | GGGAGCTATAGTGACAGCAGTTAG        |
| sequenom | SEQ012 | sf000209_01AG | sf000209_01AG_CT_F | ACGTTGGATGTCTGTTCATTAGCCAGAGCC  | sf000209_01AG_CT_R | ACGTTGGATGCGGTCCGATCAGTTTTTCTC | sf000209_01AG_CT_P    | AGCCATTGTGACTTAAATGTCTC         |
| sequenom | SEQ012 | sf000230_01CG | sf000230_01CG_TA_F | ACGTTGGATGTGAAAGTAGCCTGGGTTGTG  | sf000230_01CG_TA_R | ACGTTGGATGCATGAGCGTCACCAACCAAT | sf000230_01CG_TA02_Pa | TGCGTCACCAACCAATGAAAAG          |
| sequenom | SEQ012 | sf000633_01AT | sf000633_01AT_GT_F | ACGTTGGATGGAGATTTCCACTCCTTACC   | sf000633_01AT_GT_R | ACGTTGGATGGCCGTTGATAGAACGGTAAC | sf000633_01AT_GT02_Pa | CAGGTCGTGGTTTTTAAATTGTCTGG      |
| sequenom | SEQ012 | sf000706_01CT | sf000706_01CT_AG_F | ACGTTGGATGGGTCAATGAATGCATCCTCG  | sf000706_01CT_AG_R | ACGTTGGATGTTGCTATGGGCTGGACAATG | sf000706_01CT_AG_P    | GCTGGACAATGGCAGAGGTGTCCAATTGCA  |
| sequenom | SEQ012 | sf000719_01CT | sf000719_01CT_AT_F | ACGTTGGATGTCAGCCTCAGCTAAAACCC   | sf000719_01CT_AT_R | ACGTTGGATGAATGGGAATGCTACTCGAGG | sf000719_01CT_AT_P    | ATGAATGTGAATGCTACTCGAGGGGAGAG   |
| sequenom | SEQ012 | sf000905_02CT | sf000905_02CT_AT_F | ACGTTGGATGCTTGTTATGGGCGTCTCTTC  | sf000905_02CT_AT_R | ACGTTGGATGCTGCAATTGGTCAAGTTGGG | sf000905_02CT_AT_P    | AAACAATACACTTTCAGATTTGTACA      |
| sequenom | SEQ012 | sf000966_03CT | sf000966_03CT_AG_F | ACGTTGGATGTCTCCCTGATGTGAGGAAAG  | sf000966_03CT_AG_R | ACGTTGGATGCTGCAGCAGAACACACATAC | sf000966_03CT_AG_P    | CCCCTCTGGTTGGCTCAGTCTT          |
| sequenom | SEQ012 | sf001069_01AG | sf001069_01AG_GT_F | ACGTTGGATGCCTGGTTTTCTCCTCAGATG  | sf001069_01AG_GT_R | ACGTTGGATGGGGACAACTGCATGTTTT   | sf001069_01AG_GT02_P  | GTTCTTCTCATGGGCTTT              |
| sequenom | SEQ012 | sf001437_01AT | sf001437_01AT_AG_F | ACGTTGGATGTGTGACACAGGGTGAGGTTT  | sf001437_01AT_AG_R | ACGTTGGATGTTTCTTGTTCAGGCGAG    | sf001437_01AT_AG_P    | GGGAAGGGTGAGGTTTGTACAACC        |
| sequenom | SEQ012 | sf001601_01AC | sf001601_01AC_CT_F | ACGTTGGATGTCCAAGACCATGGATGAGAG  | sf001601_01AC_CT_R | ACGTTGGATGATTGCAGGGATGTGCAGTAG | sf001601_01AC_CT_P    | ATGTCTGACCAATACTGTCTAT          |
| sequenom | SEQ012 | sf001644_01AG | sf001644_01AG_GT_F | ACGTTGGATGCAAACAGACATGTCATCACG  | sf001644_01AG_GT_R | ACGTTGGATGTTACATGCACCAGATGCTCC | sf001644_01AG_GT_Pa   | TTTTGGGGACCGAGCAAAGAATTTT       |
| sequenom | SEQ012 | sf001686_01CT | sf001686_01CT_GA_F | ACGTTGGATGGAGTTGAGCCGTTCTGTATC  | sf001686_01CT_GA_R | ACGTTGGATGTCTGTGACAGTCCAGGTG   | sf001686_01CT_GA_Pa   | GGCAACGTGGTGACAG                |
| sequenom | SEQ012 | sf001996_02CG | sf001996_02CG_AG_F | ACGTTGGATGACCATGGGCCAAAAAGCTTG  | sf001996_02CG_AG_R | ACGTTGGATGTTTCTTCCACAGTGCCCTC  | sf001996_02CG_AG_P    | TGCCTCACAAGTGCTA                |
| sequenom | SEQ012 | sf002203_01CT | sf002203_01CT_AG_F | ACGTTGGATGGGTTCAATCCCTTTGCATCC  | sf002203_01CT_AG_R | ACGTTGGATGGGTGGCAGAACCAGTTTT   | sf002203_01CT_AG_P    | CCTTTCAATGCTTTTCAGC             |
| sequenom | SEQ012 | sf002250_01AG | sf002250_01AG_CA_F | ACGTTGGATGAAAGATGGCTGATCTCCCTC  | sf002250_01AG_CA_R | ACGTTGGATGTTGTGCACTTTTCGTCTTG  | sf002250_01AG_CA_P    | CCCCACTACAAATGGGCCAAAAACAAT     |
| sequenom | SEQ012 | sf002353_02AT | sf002353_02AT_CT_F | ACGTTGGATGATTTCAACCAGCCATGGGAG  | sf002353_02AT_CT_R | ACGTTGGATGAGTTGTTGCCACTCACCTG  | sf002353_02AT_CT_P    | GGTGGTTGATGCCCTT                |
| sequenom | SEQ012 | sf002792_01AG | sf002792_01AG_AG_F | ACGTTGGATGGTTCAATTGTGGTGAACGGAC | sf002792_01AG_AG_R | ACGTTGGATGAAGAGTTTCAGTAGCCCTGC | sf002792_01AG_AG02_P  | GGCAAGCCTCTGTAGAACAATGG         |
| sequenom | SEQ012 | sf003076_01CT | sf003076_01CT_AG_F | ACGTTGGATGCAGTGGTTAGATGGTACGC   | sf003076_01CT_AG_R | ACGTTGGATGACACCGCTATTTCTGGTTG  | sf003076_01CT_AG_P    | CCCTTTGGTACATAAACTGAAATTAGGC    |
| sequenom | SEQ012 | sf003092_01CT | sf003092_01CT_TC_F | ACGTTGGATGTTCCAAGCCCTAGATTTGCC  | sf003092_01CT_TC_R | ACGTTGGATGATATCAACTGACTGGAGGGC | sf003092_01CT_TC_Pa   | ATTCATAATTCTATATCATTACAGC       |
| sequenom | SEQ012 | sf003118_01GT | sf003118_01GT_GA_F | ACGTTGGATGCTATGAGGAGTGGTGTGTTT  | sf003118_01GT_GA_R | ACGTTGGATGCCATACAAAACCTCTGTAG  | sf003118_01GT_GA_Pa   | GGAAAAACCTCTGTAGTGTATGGCGG      |
| sequenom | SEQ012 | sf003334_01CT | sf003334_01CT_AG_F | ACGTTGGATGTTATAGCTTCAAATAGGCC   | sf003334_01CT_AG_R | ACGTTGGATGGGCCTATGTAACCTAGCCAG | sf003334_01CT_AG_P    | CCATTTATTTGTGTTCTGGAAAAATGTGAAC |
| sequenom | SEQ012 | sf003500_02CT | sf003500_02CT_CT_F | ACGTTGGATGAGAGGCGCGATGAATTTAAG  | sf003500_02CT_CT_R | ACGTTGGATGTGACAGCTGACAATGTGCTC | sf003500_02CT_CT02_P  | CGTGCTCTTGCTCGAGC               |

|          |        |               |                    |                                |                    |                                  |                       |                               |
|----------|--------|---------------|--------------------|--------------------------------|--------------------|----------------------------------|-----------------------|-------------------------------|
| sequenom | SEQ012 | sf003595_01CT | sf003595_01CT_AT_F | ACGTTGGATGTGTACACTTTTCCAATGC   | sf003595_01CT_AT_R | ACGTTGGATGGCCTAGTCACAGCATTTACG   | sf003595_01CT_AT_P    | CACAATAAAGTGTGTACAG           |
| sequenom | SEQ012 | sf003614_01CT | sf003614_01CT_GT_F | ACGTTGGATGGACCTGAAGTTCAGCAGTAG | sf003614_01CT_GT_R | ACGTTGGATGTCTGACTGACGGAAGTCTGATG | sf003614_01CT_GT_Pa   | CATCTTTAAACCTTACAGGT          |
| sequenom | SEQ012 | sf003813_11CT | sf003813_11CT_AG_F | ACGTTGGATGAAGACATGGTTACTGACGGC | sf003813_11CT_AG_R | ACGTTGGATGTTCTCTCTCTCCAGCCAAC    | sf003813_11CT_AG02_P  | CCTGACCCCAACGAGGAGCT          |
| sequenom | SEQ012 | sf004055_02CT | sf004055_02CT_AT_F | ACGTTGGATGTAGCGCAGGATTTTACGACC | sf004055_02CT_AT_R | ACGTTGGATGCCAGTGTGAGTGTCTAATG    | sf004055_02CT_AT_P    | CAGGGAGACTTGTAATTCAGC         |
| sequenom | SEQ012 | sf006073_01CT | sf006073_01CT_GA_F | ACGTTGGATGAGCCTGGAGTGTTTTTCTG  | sf006073_01CT_GA_R | ACGTTGGATGAGTGGCCGTCGTCAAGTTG    | sf006073_01CT_GA_Pa   | TCTGTTTGCTGCTAGTG             |
| sequenom | SEQ013 | sf000002_01AG | sf000002_01AG_AG_F | ACGTTGGATGGCACAAGAGAGCTATATTAC | sf000002_01AG_AG_R | ACGTTGGATGGAGAGCCCTTACAGTTTAC    | sf000002_01AG_AG_P    | CCTCCCTTTGCTACGTGGATA         |
| sequenom | SEQ013 | sf000017_01CT | sf000017_01CT_GC_F | ACGTTGGATGCACAATGCAGATCCCAGATG | sf000017_01CT_GC_R | ACGTTGGATGGGCTCCAGCTTTAATTGTG    | sf000017_01CT_GC02_Pa | ATAAGTACTCTCTGAATGGGAT        |
| sequenom | SEQ013 | sf000021_01AG | sf000021_01AG_CA_F | ACGTTGGATGTAATGACCTCTAGCCACCTC | sf000021_01AG_CA_R | ACGTTGGATGATAAACAGCTGTGTGGGACG   | sf000021_01AG_CA_Pa   | GGGATGGGTCTGCTGGAT            |
| sequenom | SEQ013 | sf000086_01CT | sf000086_01CT_CT_F | ACGTTGGATGTATCCATAGGGCAAGCGTAG | sf000086_01CT_CT_R | ACGTTGGATGGCGAAGTCGTGACACAAAAG   | sf000086_01CT_CT_P    | AAACGTGCTTATAGACAAC           |
| sequenom | SEQ013 | sf000088_01AC | sf000088_01AC_GA_F | ACGTTGGATGGGTTTGCAGAACACAAAAGC | sf000088_01AC_GA_R | ACGTTGGATGTCCACTGGTCTGGTGTATTC   | sf000088_01AC_GA_Pa   | CAACTATATTGATTTAATAAACTTGGGAC |
| sequenom | SEQ013 | sf000119_01AG | sf000119_01AG_AG_F | ACGTTGGATGCAGCAGCTATTGTTGCTATC | sf000119_01AG_AG_R | ACGTTGGATGACAAAACAGTGTCTAGGGAG   | sf000119_01AG_AG_P    | GAATTACTTACAGCAGACTGAATACAGT  |
| sequenom | SEQ013 | sf000139_01CG | sf000139_01CG_GT_F | ACGTTGGATGCCTAATGTTACGAAATACCC | sf000139_01CG_GT_R | ACGTTGGATGGCGGTCTTTTACTGCAAC     | sf000139_01CG_GT_Pa   | CAAGTATAAGCCTAATAGACACATTT    |
| sequenom | SEQ013 | sf000157_01AT | sf000157_01AT_CA_F | ACGTTGGATGAGATCAGCAGAGCAGACAAG | sf000157_01AT_CA_R | ACGTTGGATGCGATATTTCCCATGGCCTG    | sf000157_01AT_CA_P    | TGGAGTTGTGTAGTCTAA            |
| sequenom | SEQ013 | sf000175_01CT | sf000175_01CT_GT_F | ACGTTGGATGTTGTCCCAACAGAAACACAG | sf000175_01CT_GT_R | ACGTTGGATGAGACGATTGGCCAATTTCC    | sf000175_01CT_GT02_P  | CGGCCAATTTCCCAAAGCA           |
| sequenom | SEQ013 | sf000392_01AC | sf000392_01AC_CT_F | ACGTTGGATGAGCCGTTTTGAAGCTGGTCC | sf000392_01AC_CT_R | ACGTTGGATGGTATGACCTCATTGAGC      | sf000392_01AC_CT_P    | TTGGAATGCAGTTGGT              |
| sequenom | SEQ013 | sf000583_02CT | sf000583_02CT_TC_F | ACGTTGGATGTTAGTGCTACCACTAGAGGG | sf000583_02CT_TC_R | ACGTTGGATGTTAGACTGGGCTTCTCTCC    | sf000583_02CT_TC_Pa   | TCCACAGTTAGCTGCAGGCGTGC       |
| sequenom | SEQ013 | sf000717_02AG | sf000717_02AG_TC_F | ACGTTGGATGGTTTCTGTTTCTCATCTCAC | sf000717_02AG_TC_R | ACGTTGGATGGTCTTGTAGGAAGTCAGATG   | sf000717_02AG_TC02_Pa | CTGTGGCTTTGAAATGTATCC         |
| sequenom | SEQ013 | sf000747_02CT | sf000747_02CT_CT_F | ACGTTGGATGATGTTGTATTCTGACTGCTG | sf000747_02CT_CT_R | ACGTTGGATGAAAGTCACTCTTAAGGCCCC   | sf000747_02CT_CT_P    | AGTAAGGCCCATGTAGGTT           |
| sequenom | SEQ013 | sf000978_02CT | sf000978_02CT_GA_F | ACGTTGGATGGCGAACCGTCTTGCAATAAC | sf000978_02CT_GA_R | ACGTTGGATGGAAACGTCTCTAGTTGCCAG   | sf000978_02CT_GA_Pa   | TTGCTAGAACATTGCCA             |
| sequenom | SEQ013 | sf001164_02GT | sf001164_02GT_TC_F | ACGTTGGATGAACTAGCTGGAATGATCAC  | sf001164_02GT_TC_R | ACGTTGGATGAAACCTCTGACGTGAGTAGC   | sf001164_02GT_TC_Pa   | GGAGACTGACTGGACAAGTTTAAGG     |
| sequenom | SEQ013 | sf001692_03CG | sf001692_03CG_CT_F | ACGTTGGATGTTCTGTGGCCTTCTGTTTC  | sf001692_03CG_CT_R | ACGTTGGATGGTAGGAAGAACAAGGACGC    | sf001692_03CG_CT_P    | CAAAGTACGCTAACAAGAGAAACGCTGAT |
| sequenom | SEQ013 | sf002333_01AC | sf002333_01AC_AG_F | ACGTTGGATGTGCCTTATCTGTATACGCTC | sf002333_01AC_AG_R | ACGTTGGATGTGCATCACACTACTGTACAC   | sf002333_01AC_AG_P    | GGGGAGGAACTGGAATTTGAAGTGC     |
| sequenom | SEQ013 | sf003018_09CT | sf003018_09CT_AG_F | ACGTTGGATGGTTCAGCACTGCCTCATTTT | sf003018_09CT_AG_R | ACGTTGGATGGGTATGACGTTCACTCTGAC   | sf003018_09CT_AG_P    | CCCTATCCACCAGGTGGCT           |
| sequenom | SEQ013 | sf003105_01CT | sf003105_01CT_TC_F | ACGTTGGATGCTAACTTTGCATCCGCACTG | sf003105_01CT_TC_R | ACGTTGGATGACAACTCCATGCACAAGGAC   | sf003105_01CT_TC_Pa   | GTCACGGAACATTTTACCAG          |
| sequenom | SEQ013 | sf003208_01CT | sf003208_01CT_TC_F | ACGTTGGATGTACAAAACCTTAGCTCCCC  | sf003208_01CT_TC_R | ACGTTGGATGTGTACAAAAGAGGATGCGG    | sf003208_01CT_TC_Pa   | CTCACAGGCGCCATCTTAATTT        |
| sequenom | SEQ013 | sf003442_01CG | sf003442_01CG_AG_F | ACGTTGGATGAGCACAGCCAACCACTTTAC | sf003442_01CG_AG_R | ACGTTGGATGAAGCTGTCTCCTGGGCTTAA   | sf003442_01CG_AG_P    | GGTTACATTATGCAGGGCATC         |
| sequenom | SEQ013 | sf003538_01AG | sf003538_01AG_GT_F | ACGTTGGATGCAATCAAGCACTTCAAATG  | sf003538_01AG_GT_R | ACGTTGGATGTGGTGCTACTTACATGGAG    | sf003538_01AG_GT_Pa   | CCTCCTAGAGGCTACATATGCAAGACAA  |
| sequenom | SEQ013 | sf003697_01CT | sf003697_01CT_CA_F | ACGTTGGATGCAAAAATGTGTGCTGTTGGG | sf003697_01CT_CA_R | ACGTTGGATGTGGGCAAAGAGGGCTATTC    | sf003697_01CT_CA_Pa   | CTGCAAAGAGGGCTATTCTAAAAT      |

|          |        |               |                    |                                 |                    |                                 |                      |                               |
|----------|--------|---------------|--------------------|---------------------------------|--------------------|---------------------------------|----------------------|-------------------------------|
| sequenom | SEQ013 | sf003715_01AT | sf003715_01AT_CT_F | ACGTTGGATGTAGATGTTCCAGGCCAAGACC | sf003715_01AT_CT_R | ACGTTGGATGCCTACAAGTCTGGAAATGTG  | sf003715_01AT_CT02_P | TGTGATAATGCATGGAATGC          |
| sequenom | SEQ013 | sf003726_01CT | sf003726_01CT_GT_F | ACGTTGGATGCCATCATTCAACACTCCTCC  | sf003726_01CT_GT_R | ACGTTGGATGTGCTCATCTAGCAACTCAGG  | sf003726_01CT_GT02_P | CCAAACTCAGGTGCTTTTCATTA       |
| sequenom | SEQ013 | sf004016_01AT | sf004016_01AT_AG_F | ACGTTGGATGCCAGTCTGTCTATAACCCATC | sf004016_01AT_AG_R | ACGTTGGATGGAACACAGAGACAATGGAGG  | sf004016_01AT_AG_P   | GGGGAATTTTGAGGTGTGTAATTACAACA |
| sequenom | SEQ013 | sf004099_01CG | sf004099_01CG_TA_F | ACGTTGGATGGGAAACACATATCTGGTGAG  | sf004099_01CG_TA_R | ACGTTGGATGGTGGAGAGTTCATCATTAGC  | sf004099_01CG_TA_Pa  | GGGCAGATCTGTTGCCAATTGG        |
| sequenom | SEQ013 | sf004299_15GT | sf004299_15GT_CT_F | ACGTTGGATGGGGACTCCACACATTACAAA  | sf004299_15GT_CT_R | ACGTTGGATGAACTAACAGTTAGCATGGTG  | sf004299_15GT_CT_P   | GAAAAGCTGAACAAAGTAATTTTCTA    |
| sequenom | SEQ013 | sf005138_03AG | sf005138_03AG_CA_F | ACGTTGGATGGGAAGGCATCCTCAAATTC   | sf005138_03AG_CA_R | ACGTTGGATGCTCATCTACTGTATCGTGTGC | sf005138_03AG_CA_Pa  | GGGGTAGTGTGCATTTCTCCAGGGTCGC  |
| sequenom | SEQ014 | sf004149_01AG | sf004149_01AG_GC_F | ACGTTGGATGGGACTATGTACAACAAGTGG  | sf004149_01AG_GC_R | ACGTTGGATGATGATGGCATGACTATGAGG  | sf004149_01AG_GC_Pa  | CCCTGTATTTTCATCCATATCGGAT     |
| sequenom | SEQ014 | sf004155_01AG | sf004155_01AG_GT_F | ACGTTGGATGGCTTTTGCTTTTACTACGGC  | sf004155_01AG_GT_R | ACGTTGGATGGATGCTGGTAGCCTAGAATA  | sf004155_01AG_GT_P   | CAGCCTAGAATAAATGTTATGGAAG     |
| sequenom | SEQ014 | sf004209_01GT | sf004209_01GT_AT_F | ACGTTGGATGCCTCACGCTAACAATTACCC  | sf004209_01GT_AT_R | ACGTTGGATGATCCCCAACACTCCTTTGTC  | sf004209_01GT_AT_P   | CACGCCTTTGCTGCTACTATAGGC      |
| sequenom | SEQ014 | sf004240_01AG | sf004240_01AG_GA_F | ACGTTGGATGTAACTCCCCCTCATACTC    | sf004240_01AG_GA_R | ACGTTGGATGTATGACACCTCCAATGTGGG  | sf004240_01AG_GA_Pa  | CAGACAAAAAAGTCTCGA            |
| sequenom | SEQ014 | sf004252_02GT | sf004252_02GT_GT_F | ACGTTGGATGGTTCATGTCTCAGACACTGG  | sf004252_02GT_GT_R | ACGTTGGATGTGAGGAGGTATTAAGTCCAG  | sf004252_02GT_GT_P   | TGAAGGCTGCTGTGGCTCTGCT        |
| sequenom | SEQ014 | sf004257_02CG | sf004257_02CG_GA_F | ACGTTGGATGTTATGTTCCACAAGTGGCCC  | sf004257_02CG_GA_R | ACGTTGGATGTTAACATGGCAAGACAGAAC  | sf004257_02CG_GA_Pa  | AGACAGAACAAATCTTATTTACAA      |
| sequenom | SEQ014 | sf004260_01AT | sf004260_01AT_TC_F | ACGTTGGATGCAGAACTGGCAGATGGAAAG  | sf004260_01AT_TC_R | ACGTTGGATGATTTGTCTTCTGCCGTTCCC  | sf004260_01AT_TC_Pa  | TCTTTCCAATGCCACAA             |
| sequenom | SEQ014 | sf004387_01AG | sf004387_01AG_TC_F | ACGTTGGATGTCATTAGTCTGCATCTGCG   | sf004387_01AG_TC_R | ACGTTGGATGCCTACGTGTTAGATACAGGC  | sf004387_01AG_TC_Pa  | CTGCAACATTTCCAGTACAC          |
| sequenom | SEQ014 | sf004426_01AG | sf004426_01AG_CT_F | ACGTTGGATGGAAGCACTGCTTTGTTACGG  | sf004426_01AG_CT_R | ACGTTGGATGAGCAAAGCCCTACATCTCTG  | sf004426_01AG_CT_P   | CTGTTCTGAATACAGGCAGCCTACA     |
| sequenom | SEQ014 | sf004438_02CT | sf004438_02CT_CT_F | ACGTTGGATGACTGGACCTGGAAAGATTGG  | sf004438_02CT_CT_R | ACGTTGGATGGTTAGTAGCCTAATTCACAG  | sf004438_02CT_CT_P   | GGTAACAGTAAACAATAGAGCTAGA     |
| sequenom | SEQ014 | sf004529_01CT | sf004529_01CT_AT_F | ACGTTGGATGGATCTCATTTTAGCAGCGAC  | sf004529_01CT_AT_R | ACGTTGGATGGGCCAGATATTGCAATTGCG  | sf004529_01CT_AT_P   | CTCCATCAGACAAGTGAC            |
| sequenom | SEQ014 | sf004545_01AC | sf004545_01AC_CA_F | ACGTTGGATGCCTTATATTAACAACACCAG  | sf004545_01AC_CA_R | ACGTTGGATGTGTCTTAGTGTGGTGTGCC   | sf004545_01AC_CA_Pa  | TTTTATTGTAATTTATTTTGTTTACAATT |
| sequenom | SEQ014 | sf004562_01AG | sf004562_01AG_CA_F | ACGTTGGATGTCAAAGTGCACAGTGAGGAG  | sf004562_01AG_CA_R | ACGTTGGATGTAACCTATTGGCTAGCCCAG  | sf004562_01AG_CA_Pa  | GTTAGGAATGGTCAACACAG          |
| sequenom | SEQ014 | sf004632_01AG | sf004632_01AG_CT_F | ACGTTGGATGGAAAGACAAATGTTTCTTTCG | sf004632_01AG_CT_R | ACGTTGGATGAGAGTAGGTGTATAACGTGG  | sf004632_01AG_CT_P   | CAACGATAACTAAGAAGTAGAA        |
| sequenom | SEQ014 | sf004642_07AG | sf004642_07AG_AG_F | ACGTTGGATGCGTCCATAATGTCAACAGGG  | sf004642_07AG_AG_R | ACGTTGGATGACCTCTGGTTTGGAGTTGTG  | sf004642_07AG_AG_P   | GGGAGGGGTGATTGAACTGCAC        |
| sequenom | SEQ014 | sf004684_01AG | sf004684_01AG_AT_F | ACGTTGGATGGTAGGTTGGTAAGACTGGAG  | sf004684_01AG_AT_R | ACGTTGGATGAACTGACATGCCAAGGATCG  | sf004684_01AG_AT_P   | ACTCATATCGACCATATATTGTGTTCCC  |
| sequenom | SEQ014 | sf004732_01CG | sf004732_01CG_CT_F | ACGTTGGATGTTCAACAGACTTTTCCCGC   | sf004732_01CG_CT_R | ACGTTGGATGAGATTGCCTCTGACTGTTCC  | sf004732_01CG_CT_P   | TTCCCCACGTTCTTTG              |
| sequenom | SEQ014 | sf004762_01AT | sf004762_01AT_CT_F | ACGTTGGATGTCGCTTGACGAATGTTGAG   | sf004762_01AT_CT_R | ACGTTGGATGATAACAGCAGCAGAGGAGTC  | sf004762_01AT_CT_P   | CCCCTCTCATCGGCAACTAATA        |
| sequenom | SEQ014 | sf004765_01CG | sf004765_01CG_CT_F | ACGTTGGATGGCACCTGTAATGAGTGAATG  | sf004765_01CG_CT_R | ACGTTGGATGGTTGTGTGACTCACATGCTG  | sf004765_01CG_CT_P   | TTACCACAAGGGATGACAA           |
| sequenom | SEQ014 | sf004817_02GT | sf004817_02GT_CG_F | ACGTTGGATGTGGGTGTCATAAAGAAAGGG  | sf004817_02GT_CG_R | ACGTTGGATGACTGTCCCTATTCCTGTTAG  | sf004817_02GT_CG_P   | GACATGACTTTACCATGTTG          |
| sequenom | SEQ014 | sf004818_06CT | sf004818_06CT_CA_F | ACGTTGGATGGGGATAGCCAATCCAGATTC  | sf004818_06CT_CA_R | ACGTTGGATGCATTAAGGCCACATAGCACC  | sf004818_06CT_CA_Pa  | CGGAGTTGGTCATTTTGG            |
| sequenom | SEQ014 | sf004848_01CT | sf004848_01CT_AT_F | ACGTTGGATGCAAGACATGGCATAAGAGGG  | sf004848_01CT_AT_R | ACGTTGGATGTAACGACGAACGATTGCTTG  | sf004848_01CT_AT_P   | TAAAGTATCGTCCAACCC            |



|          |        |               |                    |                                  |                    |                                  |                     |                                |
|----------|--------|---------------|--------------------|----------------------------------|--------------------|----------------------------------|---------------------|--------------------------------|
| sequenom | SEQ014 | sf004870_01CG | sf004870_01CG_GA_F | ACGTTGGATGCACGCCTTACAACAGAATAG   | sf004870_01CG_GA_R | ACGTTGGATGGAAGTCTGCCAGTCAAAG     | sf004870_01CG_GA_Pa | GAGGATTAATAATTATACTGTACAAG     |
| sequenom | SEQ014 | sf004904_09CT | sf004904_09CT	CG_F | ACGTTGGATGGGCATGCAGAGTTCAATTAG   | sf004904_09CT	CG_R | ACGTTGGATGAAGACCGGGCATTCAACTTG   | sf004904_09CT	CG_P  | TTGAAGTTGATACTGTTTCCATGGTAA    |
| sequenom | SEQ014 | sf004909_01GT | sf004909_01GT_TA_F | ACGTTGGATGGCCCTGTAACTCCTTAGTG    | sf004909_01GT_TA_R | ACGTTGGATGATGGGACAATGATCACTGAG   | sf004909_01GT_TA_Pa | GAGCACTGAGATCATATGCAAAT        |
| sequenom | SEQ014 | sf004913_01GT | sf004913_01GT_CA_F | ACGTTGGATGGAAGCCAGATGTTAAGATGAC  | sf004913_01GT_CA_R | ACGTTGGATGCCCCAGATTTGAGTCTGTAG   | sf004913_01GT_CA_P  | TTTCAAATGACAAGGCAATCTCACAA     |
| sequenom | SEQ014 | sf004975_01CG | sf004975_01CG_TC_F | ACGTTGGATGGGAAGTTTCTGCTCAAATGAG  | sf004975_01CG_TC_R | ACGTTGGATGAACGGCCTCGTACTCTATTC   | sf004975_01CG_TC_Pa | CAGCCTCGTACTCTATTCTAGATC       |
| sequenom | SEQ014 | sf004977_01AT | sf004977_01AT_CT_F | ACGTTGGATGGCCTTGATGTTTCATCAGTCC  | sf004977_01AT_CT_R | ACGTTGGATGAGTCATCTTTCCCTCCAGC    | sf004977_01AT_CT_P  | CCTCTCCATTTATAGACAATTTGTC      |
| sequenom | SEQ014 | sf005000_09CT | sf005000_09CT_TC_F | ACGTTGGATGATGCCGTTCTGTACCATCAC   | sf005000_09CT_TC_R | ACGTTGGATGCCTAACAAATCCACAACACTAC | sf005000_09CT_TC_Pa | GTCCACAACACTACTACCTTATACAC     |
| sequenom | SEQ014 | sf005054_02AC | sf005054_02AC_GA_F | ACGTTGGATGCCACCCAACACTCAATTCC    | sf005054_02AC_GA_R | ACGTTGGATGTGTTCTCAATTGAGGCGCAG   | sf005054_02AC_GA_Pa | GAGGCGCAGATAAGCG               |
| sequenom | SEQ014 | sf005079_01AG | sf005079_01AG_CA_F | ACGTTGGATGACCCACCATCACAACCTCGAC  | sf005079_01AG_CA_R | ACGTTGGATGGAACATCTGAAATATTGTCTG  | sf005079_01AG_CA_P  | ATTCCGATCTGTGTCTTTCCATTGCTGTG  |
| sequenom | SEQ014 | sf005248_01AG | sf005248_01AG_CT_F | ACGTTGGATGTTGCTGGGATTTACCACCAC   | sf005248_01AG_CT_R | ACGTTGGATGGGGTAGCCAATCCAGATTTT   | sf005248_01AG_CT_P  | TTACACACTCAGGTATAGCAC          |
| sequenom | SEQ014 | sf005272_01CG | sf005272_01CG_GC_F | ACGTTGGATGAGATGAGGGAGTGTGAGAG    | sf005272_01CG_GC_R | ACGTTGGATGTTAGCCATTTTCTCCCCG     | sf005272_01CG_GC_Pa | CCGGTGTCTGTGACT                |
| sequenom | SEQ014 | sf005409_04AT | sf005409_04AT_CA_F | ACGTTGGATGAGATGTATTGGAGTAGTGCC   | sf005409_04AT_CA_R | ACGTTGGATGTCAGGCATTTACAGCCTCAC   | sf005409_04AT_CA_P  | TGTGGTATGGCATCAGACAGAAAT       |
| sequenom | SEQ014 | sf005410_01AG | sf005410_01AG_CA_F | ACGTTGGATGGGATGAGCAATGTCAGAGCG   | sf005410_01AG_CA_R | ACGTTGGATGTATCCATGCCCAATGGGAAC   | sf005410_01AG_CA_Pa | ACTCCATTCCGGCTCCA              |
| sequenom | SEQ014 | sf005420_01CG | sf005420_01CG_GA_F | ACGTTGGATGTTGAAGATGGTGTGTTCTC    | sf005420_01CG_GA_R | ACGTTGGATGGATGCCATCAAGGCCAAAAC   | sf005420_01CG_GA_Pa | ACACTTTAGTGTTTAAAGCA           |
| sequenom | SEQ015 | sf000020_CT   | sf000020_CT_CT_F   | ACGTTGGATGGGCGATCTCTGTTCTTAATG   | sf000020_CT_CT_R   | ACGTTGGATGGGTAAAGTGGTAGAGGTAGC   | sf000020_CT_CT_P    | AGATCAGATTATTCTTTGTGAGAG       |
| sequenom | SEQ015 | sf000382_AG   | sf000382_AG_GA_F   | ACGTTGGATGTGGCAAAATCAAAGCCAGAC   | sf000382_AG_GA_R   | ACGTTGGATGGTTTGTAGACTGGCTACATC   | sf000382_AG_GA_Pa   | GGCTACATCTTATATCATCATCT        |
| sequenom | SEQ015 | sf000508_CT   | sf000508_CT_TC_F   | ACGTTGGATGGTGTGTGACATATTCTCCCC   | sf000508_CT_TC_R   | ACGTTGGATGTTGCTCAGAGAGCCAGAGAG   | sf000508_CT_TC_Pa   | GAGTTACACAGAGACGTGTCATC        |
| sequenom | SEQ015 | sf000559_AG   | sf000559_AG_GA_F   | ACGTTGGATGGGTGATAGTGGGACTGATAG   | sf000559_AG_GA_R   | ACGTTGGATGAAGAAGAGCAGTTGCCAG     | sf000559_AG_GA_Pa   | GGGTGTCCTTCTCCTTCATAGGAC       |
| sequenom | SEQ015 | sf000681_AT   | sf000681_AT_AT_F   | ACGTTGGATGGATACTCCACACAAAACCC    | sf000681_AT_AT_R   | ACGTTGGATGGAGGTATGAGGTATTGGAGG   | sf000681_AT_AT_P    | GCAAGGTAAAGTATGTAGTAT          |
| sequenom | SEQ015 | sf000684_CT   | sf000684_CT_TC_F   | ACGTTGGATGTGTATAATGAGTAGGCCCCC   | sf000684_CT_TC_R   | ACGTTGGATGGCATGCTCCACTTTTGAACC   | sf000684_CT_TC_Pa   | CCCCTCTTTGTATAACCTATGCATACAC   |
| sequenom | SEQ015 | sf000744_AT   | sf000744_AT_AT_F   | ACGTTGGATGCAGTGAAGGGAACACTGACCAC | sf000744_AT_AT_R   | ACGTTGGATGCACTCGGTATGTTCTTCTC    | sf000744_AT_AT_P    | CTATGGTCTTCTCTGTATCTTGAGAGCTG  |
| sequenom | SEQ015 | sf001105_AG   | sf001105_AG_AG_F   | ACGTTGGATGTGTCTCTGAAAGCACCAATC   | sf001105_AG_AG_R   | ACGTTGGATGTACCACACATGGCACATGAG   | sf001105_AG_AG_P    | CCTCTTATATTAATAACTCCCCTGTAGT   |
| sequenom | SEQ015 | sf001667_AG   | sf001667_AG_GA_F   | ACGTTGGATGGCCTCTCACACAACTGTAG    | sf001667_AG_GA_R   | ACGTTGGATGAGTCACTGCAATTCACAGCC   | sf001667_AG_GA_Pa   | TGGGCCGGGTTTAGATT              |
| sequenom | SEQ015 | sf001831_AC   | sf001831_AC_CA_F   | ACGTTGGATGCCAGTACATTTCCAGCTGTG   | sf001831_AC_CA_R   | ACGTTGGATGTCATTGGTATCAACTGATGC   | sf001831_AC_CA_Pa   | CTCCTCAACTGATGCCCTACT          |
| sequenom | SEQ015 | sf002145	CG   | sf002145	CG	CG_F   | ACGTTGGATGTCTGACAGGTACACACACAG   | sf002145	CG	CG_R   | ACGTTGGATGGTCATTCTGGACAGGAGTTC   | sf002145	CG	CG_P    | GCAGTCTGGACAGGAGTTCCTACAGTA    |
| sequenom | SEQ015 | sf003455_AG   | sf003455_AG_AG_F   | ACGTTGGATGATAACCAGTAGGGCAACGTC   | sf003455_AG_AG_R   | ACGTTGGATGTATACGAAGTCGCTGACAAC   | sf003455_AG_AG_P    | GGTCGTTGATATAAATGTTAATGAATTAGC |
| sequenom | SEQ015 | sf003520_AG   | sf003520_AG_GA_F   | ACGTTGGATGGATGCGAGGGAGACAGATTG   | sf003520_AG_GA_R   | ACGTTGGATGATGAGAGAGGATAGAAAGGG   | sf003520_AG_GA_Pa   | GGCAGAATGAATATCATGTCAATTA      |
| sequenom | SEQ015 | sf003994_GT   | sf003994_GT_GT_F   | ACGTTGGATGCCCCATGTATGTTTCTCAAG   | sf003994_GT_GT_R   | ACGTTGGATGTCAAGCCCCAACAAATATAGG  | sf003994_GT_GT_P    | ACCTCTTAAAGAGCTACACATTTGT      |

|          |        |              |                   |                                 |                   |                                 |                   |                                |
|----------|--------|--------------|-------------------|---------------------------------|-------------------|---------------------------------|-------------------|--------------------------------|
| sequenom | SEQ015 | sf004013_AC  | sf004013_AC_CA_F  | ACGTTGGATGTGTGTTGTGCGTGCATG     | sf004013_AC_CA_R  | ACGTTGGATGGGATTTGGGAAGTGAAGTGC  | sf004013_AC_CA_P  | CCTCACACTGACACCA               |
| sequenom | SEQ015 | sf004038_AG  | sf004038_AG_AG_F  | ACGTTGGATGAACTAGAGCGGATAACCATC  | sf004038_AG_AG_R  | ACGTTGGATGCCGGGTGAAGATAACAATG   | sf004038_AG_AG_P  | CCCCAGGGTTAAACCGTTCC           |
| sequenom | SEQ015 | sf004090_CG  | sf004090_CG_GC_F  | ACGTTGGATGAATAAACCCAGGCCAGAGATG | sf004090_CG_GC_R  | ACGTTGGATGCCGGCCTTTTATGGTTTTGC  | sf004090_CG_GC_Pa | CCGCTGTCAACCTCTATT             |
| sequenom | SEQ015 | sf004131_AG  | sf004131_AG_AG_F  | ACGTTGGATGAAAAACCCCAAACAGGAAC   | sf004131_AG_AG_R  | ACGTTGGATGAGATTCTGCGTGTAAACGCC  | sf004131_AG_AG_P  | GGGGTACGTAGAATGATGTGATTAC      |
| sequenom | SEQ015 | sf004357_CT  | sf004357_CT_CT_F  | ACGTTGGATGAACTGCAAACATGGCAACCC  | sf004357_CT_CT_R  | ACGTTGGATGATGTCTAATTCCTCCGCTCC  | sf004357_CT_CT_P  | TGTTGCAGCAATGATAATGTGGA        |
| sequenom | SEQ015 | sf004379_CT  | sf004379_CT_TC_F  | ACGTTGGATGGTGAGGTCAACTCAGAGTTC  | sf004379_CT_TC_R  | ACGTTGGATGGTTTCTAGGTGACCTGGAG   | sf004379_CT_TC_Pa | GACCTGGAGGTGAGCC               |
| sequenom | SEQ015 | sf004475_CT  | sf004475_CT_TC_F  | ACGTTGGATGCCGATGTTGTACTTTGAGC   | sf004475_CT_TC_R  | ACGTTGGATGTTTGTGCCAAATGGCACC    | sf004475_CT_TC_Pa | ATGGCACCTATGTATAATACACTATATA   |
| sequenom | SEQ015 | sf004521_CG  | sf004521_CG_GC_F  | ACGTTGGATGGATCCATGTGATTCGTGCC   | sf004521_CG_GC_R  | ACGTTGGATGGTGTGACAGAGAAACGTTAC  | sf004521_CG_GC_P  | ACATATAGTGATATAAATGATTTTGATA   |
| sequenom | SEQ015 | sf004541_AC  | sf004541_AC_CA_F  | ACGTTGGATGCCCTCTTTTCTCATTCTC    | sf004541_AC_CA_R  | ACGTTGGATGCGCATGACACCACAATTGAG  | sf004541_AC_CA_Pa | CCCATCTAACTAAATCCCAGACGACA     |
| sequenom | SEQ015 | sf004614_AG  | sf004614_AG_AG_F  | ACGTTGGATGGAACTAGCGCTATCAATGG   | sf004614_AG_AG_R  | ACGTTGGATGCAGGCCTGATTTCCACATA   | sf004614_AG_AG_P  | CCTTTCCACATAATTCCTTCACTC       |
| sequenom | SEQ015 | sf004897_AT  | sf004897_AT_TA_F  | ACGTTGGATGGTGGCTATGACGGTGATTC   | sf004897_AT_TA_R  | ACGTTGGATGTTTTGCGTCTGTTCCCCC    | sf004897_AT_TA_Pa | GGCATAGTGCCTATTAAG             |
| sequenom | SEQ015 | sf005186_CT  | sf005186_CT_TC_F  | ACGTTGGATGCCTTTCTCCAACCTCCATC   | sf005186_CT_TC_R  | ACGTTGGATGGTTGACCAGGGCTTTGTTAG  | sf005186_CT_TC_Pa | CTTGTTAGTAACACTCTAGA           |
| sequenom | SEQ015 | sf005258_AC  | sf005258_AC_CA_F  | ACGTTGGATGTTGGCTTCTGGCTTGTAAC   | sf005258_AC_CA_R  | ACGTTGGATGAGAGCTCCCCATCTGATAG   | sf005258_AC_CA_Pa | CGATAGCAGAGTCGAAGTA            |
| sequenom | SEQ015 | sf005286_CT  | sf005286_CT_CT_F  | ACGTTGGATGAAAAAGTTGACGCGCTCTG   | sf005286_CT_CT_R  | ACGTTGGATGCCACTTTTCCCGATTACC    | sf005286_CT_CT_P  | ACTTGCACGATCTACAC              |
| sequenom | SEQ015 | sf005443_CG  | sf005443_CG_GC_F  | ACGTTGGATGGCAATCACAAACCAATTGAGC | sf005443_CG_GC_R  | ACGTTGGATGTCCATCTTGCCATCCATTC   | sf005443_CG_GC_Pa | TCAAGCGTTGAAGTCAATATCT         |
| sequenom | SEQ015 | sf005501_AG  | sf005501_AG_GA_F  | ACGTTGGATGAGACACATCCTGCCATTTGC  | sf005501_AG_GA_R  | ACGTTGGATGTTTTCCAAGTACCAAAGCTG  | sf005501_AG_GA_Pa | ATGTTCTTACTCTGTGG              |
| sequenom | SEQ015 | sf005540_CT  | sf005540_CT_TC_F  | ACGTTGGATGCAGAGCATTTATCCCACAAC  | sf005540_CT_TC_R  | ACGTTGGATGTGGACATCTCAATTTCTCCC  | sf005540_CT_TC_Pa | ACTTATGCAAACACTTGCACATGACCT    |
| sequenom | SEQ015 | sf005590_CT  | sf005590_CT_TC_F  | ACGTTGGATGTGCAGTGTGTGACTGAAAGC  | sf005590_CT_TC_R  | ACGTTGGATGATGTGACATGTGACGGTGAG  | sf005590_CT_TC_Pa | AGGGGAGACAGTGATAGTGGTAT        |
| sequenom | SEQ015 | sf005652_AG  | sf005652_AG_GA_F  | ACGTTGGATGGAGCGGAGCATGAATATGA   | sf005652_AG_GA_R  | ACGTTGGATGTGATTTAGGCTGTGCGCTG   | sf005652_AG_GA_Pa | GACACCATTTCACTGTTGT            |
| sequenom | SEQ015 | sf005654_CT  | sf005654_CT_CT_F  | ACGTTGGATGATCTACCGCACAACTCTCAC  | sf005654_CT_CT_R  | ACGTTGGATGTAATGACGTTTCTGGCGGG   | sf005654_CT_CT_P  | CTCACTATAGCCTTTGCATCACACTGTTGT |
| sequenom | SEQ015 | sf005769_CTb | sf005769_CTb_CT_F | ACGTTGGATGGCCGCTGAAAAGAATCCTTG  | sf005769_CTb_CT_R | ACGTTGGATGTGTATCTGGACCACACTG    | sf005769_CTb_CT_P | TTTCTCTGAGAGCA                 |
| sequenom | SEQ015 | sf006000_AG  | sf006000_AG_GA_F  | ACGTTGGATGATTGACACACCATAAGTAGC  | sf006000_AG_GA_R  | ACGTTGGATGACGTTGGCAGATGCAGTGGA  | sf006000_AG_GA_Pa | GATGCAGTGGATTGAGA              |
| sequenom | SEQ015 | sf006410_AG  | sf006410_AG_GA_F  | ACGTTGGATGCTGTTGAAAAGGCAGTCATC  | sf006410_AG_GA_R  | ACGTTGGATGACTCAAGACCCTCACATAAG  | sf006410_AG_GA_Pa | AACCATGTTCTATGATTTCTAATATTT    |
| sequenom | SEQ016 | sf000518_GT  | sf000518_GT_GT_F  | ACGTTGGATGCCACTTCACTGTTATGCTGG  | sf000518_GT_GT_R  | ACGTTGGATGGGCTAGTGGAAAGAAGACATC | sf000518_GT_GT_P  | GCTGAGAAACCATTGAGCTCAGAAATAT   |
| sequenom | SEQ016 | sf000554_CT  | sf000554_CT_TC_F  | ACGTTGGATGCAGGTTGACTGTGTCTCTAC  | sf000554_CT_TC_R  | ACGTTGGATGCTAGCCAGGTCTCTAGACAG  | sf000554_CT_TC_Pa | GAGGGGAGAGACAGCATGCATGTA       |
| sequenom | SEQ016 | sf000656_AG  | sf000656_AG_GA_F  | ACGTTGGATGCCGACTGCATATGAATAGAG  | sf000656_AG_GA_R  | ACGTTGGATGTACGCGTATTGGATTCTCTG  | sf000656_AG_GA_Pa | ATCCAATAAATTATTTCTCCAATCA      |
| sequenom | SEQ016 | sf001196_AG  | sf001196_AG_GA_F  | ACGTTGGATGAATGGGATACGCTGTCTGAG  | sf001196_AG_GA_R  | ACGTTGGATGTACAGTCACTTTGCCATCC   | sf001196_AG_GA_Pa | GCTTGCGTTAATGACCT              |
| sequenom | SEQ016 | sf001288_CT  | sf001288_CT_CT_F  | ACGTTGGATGAGACCAGACACAAACATGAG  | sf001288_CT_CT_R  | ACGTTGGATGTCCAGTACCAGATGGATTG   | sf001288_CT_CT_P  | AGCTTATTCATCTGCCACA            |

|          |        |             |                  |                                 |                  |                                 |                   |                                |
|----------|--------|-------------|------------------|---------------------------------|------------------|---------------------------------|-------------------|--------------------------------|
| sequenom | SEQ016 | sf001359_AG | sf001359_AG_GA_F | ACGTTGGATGCCGGAGTGCTTATAGTACAG  | sf001359_AG_GA_R | ACGTTGGATGCATCCCTTTCTTTGAATAC   | sf001359_AG_GA_Pa | GGCGTTGAATACACATTGTCATTTATATCA |
| sequenom | SEQ016 | sf001812_AG | sf001812_AG_AG_F | ACGTTGGATGTGTGCAACTGCAGCTTTACG  | sf001812_AG_AG_R | ACGTTGGATGCCCATCTGCTGGAACCAAC   | sf001812_AG_AG_P  | TGGAACCAACCCCTTC               |
| sequenom | SEQ016 | sf001916_AG | sf001916_AG_GA_F | ACGTTGGATGAAGAACAGTGTACCGGAAAG  | sf001916_AG_GA_R | ACGTTGGATGCGGCAAGTTAGCTAATGTTT  | sf001916_AG_GA_Pa | GTTCCGAATATGAGGCAATC           |
| sequenom | SEQ016 | sf002018_AC | sf002018_AC_CA_F | ACGTTGGATGGATTGAGGTGGAGCTGATTG  | sf002018_AC_CA_R | ACGTTGGATGCCAGGAAGGTTTTATAACTG  | sf002018_AC_CA_P  | ACAGGAAGGTTTTATAACTGTAATAA     |
| sequenom | SEQ016 | sf002131_AG | sf002131_AG_GA_F | ACGTTGGATGGTCATCAGTATCACATTGGC  | sf002131_AG_GA_R | ACGTTGGATGCTGACACTGCTATCTTTGCC  | sf002131_AG_GA_Pa | GGGGAGTCTATTAACATGGAGTCATGTA   |
| sequenom | SEQ016 | sf002439_CT | sf002439_CT_CT_F | ACGTTGGATGTTCCACGGCCTGTAAGTAAC  | sf002439_CT_CT_R | ACGTTGGATGGATAACACGCTGAGTCAACC  | sf002439_CT_CT_P  | CGCTGAGTCAACCTAAAGAT           |
| sequenom | SEQ016 | sf002640_AG | sf002640_AG_AG_F | ACGTTGGATGCCCTTACACAATCAGTTTGC  | sf002640_AG_AG_R | ACGTTGGATGCTTGAGATGATCCACAGG    | sf002640_AG_AG_P  | TGTCAACTCTCCCTCC               |
| sequenom | SEQ016 | sf003633_AG | sf003633_AG_GA_F | ACGTTGGATGGAAGGTATTGTGAGAGACGC  | sf003633_AG_GA_R | ACGTTGGATGTACACACTCCACATGGAAC   | sf003633_AG_GA_Pa | CACATGGAACATTAAGAACAAG         |
| sequenom | SEQ016 | sf003647_CG | sf003647_CG_GC_F | ACGTTGGATGGCAATCACAACCAATTGAGC  | sf003647_CG_GC_R | ACGTTGGATGCCATCTTGCCATCCATTC    | sf003647_CG_GC_Pa | CTCTGTCAAGCGTTGAAGTCAATATCT    |
| sequenom | SEQ016 | sf003788_GT | sf003788_GT_GT_F | ACGTTGGATGTTATTGCAGTCCATTTGTG   | sf003788_GT_GT_R | ACGTTGGATGCTCCATCAAGAAGTCATGGG  | sf003788_GT_GT_Pa | GAATCTTGAGCTATCAGTTATCCTGTAT   |
| sequenom | SEQ016 | sf004056_CT | sf004056_CT_TC_F | ACGTTGGATGGAAGGATGTCATTGGACCAG  | sf004056_CT_TC_R | ACGTTGGATGAACCTCTGGATTGCAAGGG   | sf004056_CT_TC_Pa | CTTAATCAAATCTCCCTTGAATCTATC    |
| sequenom | SEQ016 | sf004192_AG | sf004192_AG_GA_F | ACGTTGGATGGTGTGAGAATAGCCTAGATG  | sf004192_AG_GA_R | ACGTTGGATGTGGGAGTCTGCTGAATAGTC  | sf004192_AG_GA_Pa | AGAAAATCTTAGGATTTTGATACCATTATA |
| sequenom | SEQ016 | sf004214_AG | sf004214_AG_GA_F | ACGTTGGATGAACTACCTGTACCCTTTGTC  | sf004214_AG_GA_R | ACGTTGGATGGGGTGTGATTTATCAGTATG  | sf004214_AG_GA_Pa | CCCTTACTCTTTCAAATTCTACTGTATGA  |
| sequenom | SEQ016 | sf004288_AG | sf004288_AG_GA_F | ACGTTGGATGGAAGCATAGTGAATTAAC    | sf004288_AG_GA_R | ACGTTGGATGCCTAACCCACTACAATATG   | sf004288_AG_GA_Pa | TTCACCCAAAAGGCATT              |
| sequenom | SEQ016 | sf004416_AC | sf004416_AC_CA_F | ACGTTGGATGTCCCGTTGTTGATGCTTGG   | sf004416_AC_CA_R | ACGTTGGATGCTCCATATGTATCAGCAG    | sf004416_AC_CA_P  | GGGGAGCAGAAATAAGACCGAT         |
| sequenom | SEQ016 | sf004423_AG | sf004423_AG_AG_F | ACGTTGGATGACACAGCAGTGAATCTTTCC  | sf004423_AG_AG_R | ACGTTGGATGGGCCACTAATCAACATTTT   | sf004423_AG_AG_P  | TTCCACAAGGTCTTTCCCTG           |
| sequenom | SEQ016 | sf004714_CT | sf004714_CT_CT_F | ACGTTGGATGCAGATGCAGACTCAGATTTT  | sf004714_CT_CT_R | ACGTTGGATGACACATTGGCTGTGTACAGG  | sf004714_CT_CT_P  | ATACTGGTGCATAGAGTTGTA          |
| sequenom | SEQ016 | sf004795_CT | sf004795_CT_CT_F | ACGTTGGATGGGGATCTTTCAAGAAGCTTAG | sf004795_CT_CT_R | ACGTTGGATGCCAGCAGTTATGTCATGCAG  | sf004795_CT_CT_P  | AGAAATAAGGCATAACTGTTAAGAA      |
| sequenom | SEQ016 | sf004811_AT | sf004811_AT_TA_F | ACGTTGGATGCATGAAGAAAATCAAGGTCTC | sf004811_AT_TA_R | ACGTTGGATGCTCTTCAAACAACACTGTGTC | sf004811_AT_TA_Pa | AATACCCGTTATAGCATAATCGTTA      |
| sequenom | SEQ016 | sf004890_AC | sf004890_AC_CA_F | ACGTTGGATGGAACAGAGCAATACTCAGTC  | sf004890_AC_CA_R | ACGTTGGATGAGGTTTCTACCCTACATTCC  | sf004890_AC_CA_P  | TCTATAGAATTTCTTAATATTATGTAGTT  |
| sequenom | SEQ016 | sf004917_CT | sf004917_CT_TC_F | ACGTTGGATGAGCAATAAGATATGTTGGGG  | sf004917_CT_TC_R | ACGTTGGATGAATCTGTTTCTGCCGTCTG   | sf004917_CT_TC_Pa | AGGGGTAGGGGACTTGCCTGAAC        |
| sequenom | SEQ016 | sf004984_AG | sf004984_AG_GA_F | ACGTTGGATGGGGATGTGCAGACATTATTC  | sf004984_AG_GA_R | ACGTTGGATGTGCACCATAGTTATGTCAC   | sf004984_AG_GA_Pa | CATAGTTATGTCATGCTTTT           |
| sequenom | SEQ016 | sf005052_AG | sf005052_AG_GA_F | ACGTTGGATGTAGAACCGATCTGGGACTC   | sf005052_AG_GA_R | ACGTTGGATGATTACACATACCCGAGACCC  | sf005052_AG_GA_Pa | TACCCGTGACAATCAGATCAGA         |
| sequenom | SEQ016 | sf005168_AC | sf005168_AC_CA_F | ACGTTGGATGGGCCAGTGGAAATGAATAG   | sf005168_AC_CA_R | ACGTTGGATGTGAGTGTACTTCTCCCGTG   | sf005168_AC_CA_Pa | AATGTGGTGGATTATTGAAG           |
| sequenom | SEQ016 | sf005344_AT | sf005344_AT_TA_F | ACGTTGGATGCACAAGCGTCATGTCTTC    | sf005344_AT_TA_R | ACGTTGGATGATTAACCCCTTTTGGGTAG   | sf005344_AT_TA_Pa | TTTGGGTAGGCACAAA               |
| sequenom | SEQ016 | sf005440_CT | sf005440_CT_TC_F | ACGTTGGATGGATACAAGGAAAAAGATTGG  | sf005440_CT_TC_R | ACGTTGGATGTCCACAACATGAACAGACAC  | sf005440_CT_TC_Pa | CCAATGAACAGACACAATATCAC        |
| sequenom | SEQ016 | sf005459_AC | sf005459_AC_CA_F | ACGTTGGATGAAGCATAATGGAGTCCCTG   | sf005459_AC_CA_R | ACGTTGGATGGTCTGATTACCTCATGCAG   | sf005459_AC_CA_Pa | TAAACAGACATGTTAAAAAATG         |
| sequenom | SEQ016 | sf005663_CT | sf005663_CT_TC_F | ACGTTGGATGACAACCTGTTGATCGAGGAC  | sf005663_CT_TC_R | ACGTTGGATGTACAGAGCTGACTGATCAC   | sf005663_CT_TC_Pa | TGGGTGTATGTGTGCGCGA            |

|          |        |              |                   |                                 |                   |                                 |                   |                                |
|----------|--------|--------------|-------------------|---------------------------------|-------------------|---------------------------------|-------------------|--------------------------------|
| sequenom | SEQ016 | sf005769_Cta | sf005769_CTa_CT_F | ACGTTGGATGGAGAGCTATCATCCAGATCG  | sf005769_CTa_CT_R | ACGTTGGATGGCAAACGCTTCTAGTTGG    | sf005769_CTa_CT_P | AAAGTTGGGCTTCCATAG             |
| sequenom | SEQ016 | sf006000_CT  | sf006000_CT_CT_F  | ACGTTGGATGTTGGCAGATGCAGTGGATTG  | sf006000_CT_CT_R  | ACGTTGGATGATTGACACACCATAAGTAGC  | sf006000_CT_CT_P  | AGAGATTTTTGCATGGGC             |
| sequenom | SEQ017 | sf000132_AG  | sf000132_AG_GA_F  | ACGTTGGATGAGTAACACAGATCCGCCTTG  | sf000132_AG_GA_R  | ACGTTGGATGATGCTTTATACACCCCGTGC  | sf000132_AG_GA_Pa | GGGAAATTGGGGATTGTGTTTACTTTG    |
| sequenom | SEQ017 | sf000364_AG  | sf000364_AG_GA_F  | ACGTTGGATGCTTGCTCTTGATGAGATG    | sf000364_AG_GA_R  | ACGTTGGATGTCTGCTTCTAGCTCTATGC   | sf000364_AG_GA_Pa | CCATTACTAGCTCTTCTCTA           |
| sequenom | SEQ017 | sf000505_CT  | sf000505_CT_CT_F  | ACGTTGGATGAACCGACGATTCCATTAG    | sf000505_CT_CT_R  | ACGTTGGATGTGTTTCACTCCACGCTGTTG  | sf000505_CT_CT_P  | CTTTCAGGATTGTCGTCTA            |
| sequenom | SEQ017 | sf000612_AT  | sf000612_AT_AT_F  | ACGTTGGATGCCGACAGACTTCTCAAAC    | sf000612_AT_AT_R  | ACGTTGGATGGCAAATGTCTAGTTGTAATG  | sf000612_AT_AT_P  | AAAATGTCTAGTTGTAATGACGTCA      |
| sequenom | SEQ017 | sf000754_AC  | sf000754_AC_CA_F  | ACGTTGGATGCAGGTTTGTGTTTCACCG    | sf000754_AC_CA_R  | ACGTTGGATGGAGGGAATAACTCTCATTCTG | sf000754_AC_CA_Pa | AACTCTCATTCTGACATTTTAC         |
| sequenom | SEQ017 | sf000899_CT  | sf000899_CT_CT_F  | ACGTTGGATGACCCTGATGTGCCTTATTGC  | sf000899_CT_CT_R  | ACGTTGGATGTGGCTGTGCTTGAATGCTG   | sf000899_CT_CT_P  | ACATGATATACCACGGGTA            |
| sequenom | SEQ017 | sf000991_AT  | sf000991_AT_TA_F  | ACGTTGGATGGGGAATAGTCTCATAATAGGC | sf000991_AT_TA_R  | ACGTTGGATGGACTCTTACGAATAGAAC    | sf000991_AT_TA_Pa | TGGATATTACATGACTATTACATGACTATT |
| sequenom | SEQ017 | sf001353_GT  | sf001353_GT_GT_F  | ACGTTGGATGGAGAGTCTGAGGAAGTGTG   | sf001353_GT_GT_R  | ACGTTGGATGATGGACCATAGAGCATGGAG  | sf001353_GT_GT_Pa | GGCATGGAGACTCTCCTC             |
| sequenom | SEQ017 | sf003142_AG  | sf003142_AG_GA_F  | ACGTTGGATGTCTCTGATCAAATCTTCTC   | sf003142_AG_GA_R  | ACGTTGGATGCGAACTTCCATTTAGCATAG  | sf003142_AG_GA_Pa | CAATTTTATATGTACATACTATCTGAT    |
| sequenom | SEQ017 | sf003899_CT  | sf003899_CT_TC_F  | ACGTTGGATGGCACAATGTCCAACAATTCC  | sf003899_CT_TC_R  | ACGTTGGATGATGTCACCCTATGACTTTGG  | sf003899_CT_TC_Pa | ACCCTATGACTTTGGAAACAT          |
| sequenom | SEQ017 | sf004211_GT  | sf004211_GT_GT_F  | ACGTTGGATGGCCACTAGCACCAATTATAC  | sf004211_GT_GT_R  | ACGTTGGATGCTGGTTCAGAATGCTAAGCC  | sf004211_GT_GT_Pa | CCTAAAATGCTAATATACGCTAACA      |
| sequenom | SEQ017 | sf004254_CT  | sf004254_CT_CT_F  | ACGTTGGATGCGTTTCTCACTTGGAAACAG  | sf004254_CT_CT_R  | ACGTTGGATGAGCTCAAGTTGCTCAACTG   | sf004254_CT_CT_P  | TAGGGAAGAGAGATGTACT            |
| sequenom | SEQ017 | sf004319_GT  | sf004319_GT_GT_F  | ACGTTGGATGTATGGGACAGGAAGTCACAG  | sf004319_GT_GT_R  | ACGTTGGATGGGCTTGCAAATCCTAAGTGG  | sf004319_GT_GT_Pa | AAGTTTGGTTAAATGGAAATAAACAT     |
| sequenom | SEQ017 | sf004353_AG  | sf004353_AG_GA_F  | ACGTTGGATGGGCTCAATAGCAACACACAG  | sf004353_AG_GA_R  | ACGTTGGATGCCTGATTAATGCCAGATCTT  | sf004353_AG_GA_Pa | ACAAAACATGAGCAGC               |
| sequenom | SEQ017 | sf004373_AG  | sf004373_AG_GA_F  | ACGTTGGATGACGCTTAGATAAGTCCCTG   | sf004373_AG_GA_R  | ACGTTGGATGTGAGGTGACAAGGGATACAG  | sf004373_AG_GA_Pa | CCTATTGATTTTTATGGGTGACCTAAC    |
| sequenom | SEQ017 | sf004560_GT  | sf004560_GT_GT_F  | ACGTTGGATGGTGTGAATCCTGAAGAAC    | sf004560_GT_GT_R  | ACGTTGGATGAGATGGGTGAGGGATATTTG  | sf004560_GT_GT_P  | GAATTGAGCATGGCAGC              |
| sequenom | SEQ017 | sf004583_AC  | sf004583_AC_CA_F  | ACGTTGGATGAGCAGTGGGCTAATCCAAAG  | sf004583_AC_CA_R  | ACGTTGGATGGAGTAAGGAAACCCATAGCC  | sf004583_AC_CA_Pa | GCTAACGTTACTTACTTTTAAAT        |
| sequenom | SEQ017 | sf004624_CT  | sf004624_CT_CT_F  | ACGTTGGATGGAACCAGTTTGCTACAGCAC  | sf004624_CT_CT_R  | ACGTTGGATGCACTAAGGTCACTTGCAAAC  | sf004624_CT_CT_P  | TCCTGTTGTTGCATGAT              |
| sequenom | SEQ017 | sf004651_AG  | sf004651_AG_AG_F  | ACGTTGGATGAAAGGGTCTCTGTGATGGTG  | sf004651_AG_AG_R  | ACGTTGGATGCGAGAGAGAGAAAACAACACG | sf004651_AG_AG_P  | CGTTATACAAGAAAACAACAGATC       |
| sequenom | SEQ017 | sf004685_AGa | sf004685_AGa_AG_F | ACGTTGGATGCTCAGACAGATCCACTGAAC  | sf004685_AGa_AG_R | ACGTTGGATGCACTAACAAAGCCAGTGTGC  | sf004685_AGa_AG_P | GTGTGCAGTAGGGCGG               |
| sequenom | SEQ017 | sf004685_CG  | sf004685_CG_GC_F  | ACGTTGGATGCACTAACAAAGCCAGTGTGC  | sf004685_CG_GC_R  | ACGTTGGATGCTCAGACAGATCCACTGAAC  | sf004685_CG_GC_Pa | GGGGTACTAGCCGATGATGCAT         |
| sequenom | SEQ017 | sf004839_CT  | sf004839_CT_CT_F  | ACGTTGGATGCGTGCTTTTTCTCAAACCC   | sf004839_CT_CT_R  | ACGTTGGATGTGTCCAAAAGTGCTTGGCAG  | sf004839_CT_CT_P  | GGCTTGGCAGGTCATATTTGATAA       |
| sequenom | SEQ017 | sf004938_CT  | sf004938_CT_TC_F  | ACGTTGGATGCCAATTATGCTTTGCTTTTG  | sf004938_CT_TC_R  | ACGTTGGATGCTCAACTGTGAATGGTCTCTG | sf004938_CT_TC_Pa | AGTTTGGATTTGGCTTACGTTAATCGT    |
| sequenom | SEQ017 | sf005311_CG  | sf005311_CG.CG_F  | ACGTTGGATGGTTACTTGTGTAGTGGAGTC  | sf005311_CG.CG_R  | ACGTTGGATGTGGTTAGCTTACCTACCTG   | sf005311_CG.CG_P  | GCATGGTAGTAACATGAGTTG          |
| sequenom | SEQ017 | sf005440_AG  | sf005440_AG_GA_F  | ACGTTGGATGTGTGTCTGTTATGTTGTGG   | sf005440_AG_GA_R  | ACGTTGGATGAGCTGTAACTTCTCAGCTAC  | sf005440_AG_GA_Pa | TCTGTAACCTTCTCAGCTACATATTG     |
| sequenom | SEQ018 | sf000020_CT  | sf000020_CT_TC_F  | ACGTTGGATGGAGAAGGCCCTAATGCAATG  | sf000020_CT_TC_R  | ACGTTGGATGGCGATCTCTGTTCTAATGC   | sf000020_CT_TC_Pa | AGGATGCAACTGACCTGGC            |

|          |        |             |                    |                                 |                    |                                 |                    |                               |
|----------|--------|-------------|--------------------|---------------------------------|--------------------|---------------------------------|--------------------|-------------------------------|
| sequenom | SEQ018 | sf000062_CG | sf000062_CG_CG_F   | ACGTTGGATGGGGTAGTAGTCTGGGTAAAG  | sf000062_CG_CG_R   | ACGTTGGATGCCTTGGAACAAGGATGGAAC  | sf000062_CG_CG_P   | ACGCCACTGAAACACACA            |
| sequenom | SEQ018 | sf000151_AT | sf000151_AT_TA_F   | ACGTTGGATGTTATCATGTGAGGCTCAGGG  | sf000151_AT_TA_R   | ACGTTGGATGGACCTAATAGTCAACGGGAG  | sf000151_AT_TA_Pa  | GACGGGAGTACTCATGATGGCACA      |
| sequenom | SEQ018 | sf000310_AC | sf000310_AC_CA_F   | ACGTTGGATGCTGTGGCTAAACATGTTAAGT | sf000310_AC_CA_R   | ACGTTGGATGGGGAAGAGTACAAACAGAGC  | sf000310_AC_CA_P   | CCTGAAGAGTACAAACAGAGCTGGGAC   |
| sequenom | SEQ018 | sf000364_GT | sf000364_GT_GT_F   | ACGTTGGATGTTGTAATAATGGCGTCGACAG | sf000364_GT_GT_R   | ACGTTGGATGGGAAAAGATCTGTTCTTGCTC | sf000364_GT_GT_P   | AGGAAAGAGCTAGTAATGG           |
| sequenom | SEQ018 | sf001287_CT | sf001287_CT_TC_F   | ACGTTGGATGCTGTCTATATATCGACCAGG  | sf001287_CT_TC_R   | ACGTTGGATGGAGACTTTAAAATCTCAAG   | sf001287_CT_TC_Pa  | GCTCGATATTCAATTAAGAAGCG       |
| sequenom | SEQ018 | sf001394_AT | sf001394_AT_TA_F   | ACGTTGGATGAATGGGATGGGCTCTTAGTG  | sf001394_AT_TA_R   | ACGTTGGATGGCTATGACCTTCATGCAATG  | sf001394_AT_TA_Pa  | AGAGTAAATGAGGTGAGAGATTA       |
| sequenom | SEQ018 | sf001546_AC | sf001546_AC_CA_F   | ACGTTGGATGTACGAGGTGTAGCTGTGATG  | sf001546_AC_CA_R   | ACGTTGGATGGGCTGTCAACAGACAAGTAG  | sf001546_AC_CA_P   | AAGTAGTCACAAACGCAACCACACACA   |
| sequenom | SEQ018 | sf001846_AG | sf001846_AG_AG_F   | ACGTTGGATGCACACTAGATATGGATCACG  | sf001846_AG_AG_R   | ACGTTGGATGATGCTTATCGTTCACCACC   | sf001846_AG_AG_P   | CCGTCGGCTTTAATATTTGACTT       |
| sequenom | SEQ018 | sf002055_AG | sf002055_AG_GA_F   | ACGTTGGATGGACTGATGCATTGTCACCTG  | sf002055_AG_GA_R   | ACGTTGGATGTAAACCCAGTTTGCTGTGC   | sf002055_AG_GA_Pa  | CCACCACTGAATCAGACAGTG         |
| sequenom | SEQ018 | sf002721_GT | sf002721_GT_GT_F   | ACGTTGGATGATTAGTGATGATGGGACTGC  | sf002721_GT_GT_R   | ACGTTGGATGGCCTCTGAAAAACACACTG   | sf002721_GT_GT_Pa  | ACTCTGAAAAACACACTGACTATATGAA  |
| sequenom | SEQ018 | sf003016_AG | sf003016_AG_GA_F   | ACGTTGGATGCCTCTATTTACAGAGGGAAG  | sf003016_AG_GA_R   | ACGTTGGATGGACCAAAGTCCCACAAACAC  | sf003016_AG_GA_Pa  | CCCCCAGCACATAACTACAGATCTTTGTC |
| sequenom | SEQ018 | sf003382_AG | sf003382_AG_GA_F   | ACGTTGGATGGCACTACTTTTGACCAGAGC  | sf003382_AG_GA_R   | ACGTTGGATGTCTAGCACAAACGTCATAAGC | sf003382_AG_GA_Pa  | AACCCATAATCCCTGTATAGTG        |
| sequenom | SEQ018 | sf003611_AC | sf003611_AC_CA_F   | ACGTTGGATGGACATAGCTCAACATGTCTG  | sf003611_AC_CA_R   | ACGTTGGATGGCTGCAGGAGAATCTAAATG  | sf003611_AC_CA_P   | TGTCGATGTACCTTTATCCAGATAA     |
| sequenom | SEQ018 | sf003639_CT | sf003639_CT_CT_F   | ACGTTGGATGCCGTTGTTATTTTCGAGCGTG | sf003639_CT_CT_R   | ACGTTGGATGAACAAACCTTTAATCCACC   | sf003639_CT_CT_P   | ACAAACCTTTAATCCACCATGTAACC    |
| sequenom | SEQ018 | sf003755_CT | sf003755_CT_TC_F   | ACGTTGGATGGCAGGAGACTTTAAATTGTG  | sf003755_CT_TC_R   | ACGTTGGATGTCTGAGCAACAGAACATGTG  | sf003755_CT_TC_Pa  | TGTGAATTAAGTGGATTATAATTAATAAC |
| sequenom | SEQ018 | sf003922_GT | sf003922_GT_GT_F   | ACGTTGGATGCCACAATGTAAGACATGCAC  | sf003922_GT_GT_R   | ACGTTGGATGCCTTTCCTGGGTAGCTTATC  | sf003922_GT_GT_P   | CAAGGATTTGTGATCACATTCTCA      |
| sequenom | SEQ018 | sf003974_GT | sf003974_GT_GT_F   | ACGTTGGATGTCTTTGTTCCCTACCCTTGC  | sf003974_GT_GT_R   | ACGTTGGATGGGTAGTCACTCTGCTCTTTC  | sf003974_GT_GT_Pa  | ATCTTTCCTGAAGTCCATGATC        |
| sequenom | SEQ018 | sf004008_AG | sf004008_AG_AG_F   | ACGTTGGATGTCTTCAGTTCCAGTTTAGC   | sf004008_AG_AG_R   | ACGTTGGATGCTAGCTGGATAAAACATGGC  | sf004008_AG_AG_P   | AGGATTGAATCCATGAGACTTCTT      |
| sequenom | SEQ018 | sf004045_CT | sf004045_CT_CT_F   | ACGTTGGATGTGTCTCTGTGTGATGCTGTG  | sf004045_CT_CT_R   | ACGTTGGATGCGGATGACATTTTCCACCTG  | sf004045_CT_CT_P   | GAGGAAAAACACCAACGAAAAACAC     |
| sequenom | SEQ018 | sf004434_AT | sf004434_AT_CG_F   | ACGTTGGATGTGCAAGATATGGGCTACTAC  | sf004434_AT_CG_R   | ACGTTGGATGCGAGTGGAAATCCAATAGCC  | sf004434_AT_CG_P   | GGTCTTTGCTTTTTAGACC           |
| sequenom | SEQ018 | sf004471_AG | sf004471_AG_GA_F   | ACGTTGGATGGATTGCCAGTGACATTGTG   | sf004471_AG_GA_R   | ACGTTGGATGGACTCCATCTTCTGGTTGGC  | sf004471_AG_GA_Pa  | TGGTTGGCTCTCTCCGC             |
| sequenom | SEQ018 | sf004521_CG | sf004521_CG_CG02_F | ACGTTGGATGTCACTTAATGGACTCCAGGC  | sf004521_CG_CG02_R | ACGTTGGATGGTGTGAGGAGAAACGTTAC   | sf004521_CG_CG02_P | ACATATAGTGATATAAATGATTTTGTATA |
| sequenom | SEQ018 | sf004656_AC | sf004656_AC_CA_F   | ACGTTGGATGATGTTTCGAAAGCAGGCTCC  | sf004656_AC_CA_R   | ACGTTGGATGTATCTACTGCCGAGAAGTG   | sf004656_AC_CA_Pa  | GGGTTTGCTTATTAAGAGACATAAA     |
| sequenom | SEQ018 | sf004668_AC | sf004668_AC_CA_F   | ACGTTGGATGTCACTGAGATAGCCAAGGAG  | sf004668_AC_CA_R   | ACGTTGGATGTCCAGAAGTGGTTAGATTC   | sf004668_AC_CA_P   | AGTTAGCTGGTTTCTGACGT          |
| sequenom | SEQ018 | sf004712_CT | sf004712_CT_CT_F   | ACGTTGGATGTCCACCTTGCTTATTGCAC   | sf004712_CT_CT_R   | ACGTTGGATGTGAGTATCTTAGCCAGCC    | sf004712_CT_CT_P   | TTGAGCTAACAATTAGCTAAATGACAT   |
| sequenom | SEQ018 | sf004715_AC | sf004715_AC_CA_F   | ACGTTGGATGACTGTACTAGTGCACGTGAC  | sf004715_AC_CA_R   | ACGTTGGATGGGTTTGGTAATGTCCAC     | sf004715_AC_CA_Pa  | TGTCCACACCCAACC               |
| sequenom | SEQ018 | sf004741_CG | sf004741_CG_CG_F   | ACGTTGGATGAGATGACAGGAAATGGAGCG  | sf004741_CG_CG_R   | ACGTTGGATGCAGTCAATTTGACAGAGCAGG | sf004741_CG_CG_P   | GTTGTTCTAGATGAAGGC            |
| sequenom | SEQ018 | sf004774_AG | sf004774_AG_AG_F   | ACGTTGGATGAACCTGCAGCCTGATCAAAG  | sf004774_AG_AG_R   | ACGTTGGATGTGGCAATGGTATGGCACATC  | sf004774_AG_AG_P   | TTGGGTACGTAGCACAAAGCATCTAGA   |

---

|          |        |             |                    |                                |                    |                                |                     |                             |
|----------|--------|-------------|--------------------|--------------------------------|--------------------|--------------------------------|---------------------|-----------------------------|
| sequenom | SEQ018 | sf005157_CT | sf005157_CT_CT_F   | ACGTTGGATGGAACATCATTGTTGGAGCAG | sf005157_CT_CT_R   | ACGTTGGATGCTTTTAAAATGGGCCTTTGC | sf005157_CT_CT_P    | GATTAGAGAACTCATGAAACA       |
| sequenom | SEQ018 | sf005160_AC | sf005160_AC_CA_F   | ACGTTGGATGCTTGAAGGCTCTTACGTTGG | sf005160_AC_CA_R   | ACGTTGGATGGTTGAGGTCAGAAGTAGAAG | sf005160_AC_CA_Pa   | ATCAGATGGAGTTGAAGACGA       |
| sequenom | SEQ018 | sf006410_AG | sf006410_AG_GA02_F | ACGTTGGATGGCTTCAATTGGCTCCATATC | sf006410_AG_GA02_R | ACGTTGGATGTGTAAACTCAAGACCCTCAC | sf006410_AG_GA02_Pa | AAACCATGTTCTATGATTTCTAATATT |

---

**Table S3 Description and annotation of the 281 SNP (single nucleotide-polymorphism) markers used to build the linkage map in the Brook charr, *Salvelinus fontinalis*.**

**Ts: transition; Tv: transversion; C: coding region; NC: non coding region; S: synonymous; NS: non synonymous; LG: linkage group.**

|             |                  | GenInfo          |           |       |      |      |    |  |
|-------------|------------------|------------------|-----------|-------|------|------|----|--|
| SNP Name    | Accession number | Identifiers (GI) | Variation | Ts/Tv | C/NC | S/NS | LG |  |
| 1 sf000002  | BT050259         | GI:209738381     | A/G       | Ts    | NC   | -    | 22 |  |
| 2 sf000017  | XP_691985.3      | GI:189515371     | C/G       | Tv    | C    | -    | 31 |  |
| 3 sf000020  |                  |                  | C/T       | Ts    | C    | NS   | 35 |  |
| 4 sf000021  | BT044685.1       | GI:209148638     | A/C       | Tv    | C    | -    | 14 |  |
| 5 sf000023  |                  |                  | C/T       | Ts    | NC   | -    | -  |  |
| 6 sf000032  |                  |                  | A/G       | Ts    | C    | -    | 15 |  |
| 7 sf000062  |                  |                  | C/G       | Tv    | NC   | -    | -  |  |
| 8 sf000071  |                  |                  | A/C       | Tv    | NC   | -    | 3  |  |
| 9 sf000078  |                  |                  | A/T       | Tv    | NC   | -    | 27 |  |
| 10 sf000086 | XM_001921499.1   | GI:189516301     | C/T       | Ts    | NC   | -    | -  |  |
| 11 sf000088 | XP_002609992.1   | GI:260830085     | A/G       | Ts    | NC   | -    | -  |  |
| 12 sf000119 |                  |                  | A/G       | Ts    | NC   | -    | 12 |  |
| 13 sf000124 |                  |                  | A/G       | Ts    | C    | -    | 17 |  |
| 14 sf000132 |                  |                  | A/G       | Ts    | NC   | -    | 13 |  |
| 15 sf000137 | NM_200955        | GI:41055673      | A/T       | Tv    | C    | NS   | -  |  |
| 16 sf000139 |                  |                  | G/T       | Tv    | NC   | -    | 4  |  |
| 17 sf000151 |                  |                  | A/T       | Tv    | NC   | -    | 15 |  |
| 18 sf000157 | NP_775368        | GI:27545272      | A/C       | Tv    | C    | NS   | 25 |  |
| 19 sf000175 | XP_001054847     | GI:109498064     | G/T       | Tv    | NC   | -    | -  |  |
| 20 sf000178 |                  |                  | A/G       | Ts    | C    | -    | 19 |  |
| 21 sf000179 |                  |                  | C/T       | Ts    | NC   | -    | 3  |  |
| 22 sf000191 |                  |                  | C/G       | Tv    | NC   | -    | -  |  |

|    |          |                |              |     |    |    |    |    |
|----|----------|----------------|--------------|-----|----|----|----|----|
| 23 | sf000209 |                |              | C/T | Ts | NC | -  | -  |
| 24 | sf000228 |                |              | A/T | Tv | NC | -  | -  |
| 25 | sf000310 |                |              | A/T | Tv | NC | -  | 10 |
| 26 | sf000324 |                |              | A/C | Tv | NC | -  | 8  |
| 27 | sf000327 |                |              | A/G | Ts | NC | -  | -  |
| 28 | sf000364 |                |              | A/G | Ts | C  | NS | 31 |
| 29 | sf000364 |                |              | G/T | Tv | C  | NS | 31 |
| 30 | sf000382 |                |              | A/G | Ts | NC | -  | -  |
| 31 | sf000390 | BT057320       | GI:221221062 | C/T | Ts | NC | -  | -  |
| 32 | sf000392 | CAAE01015004.1 | GI:47226310  | C/T | Ts | C  | -  | 23 |
| 33 | sf000397 |                |              | C/G | Tv | NC | -  | 20 |
| 34 | sf000428 |                |              | A/T | Tv | NC | -  | 3  |
| 35 | sf000505 |                |              | C/T | Ts | C  | -  | 1  |
| 36 | sf000508 |                |              | C/T | Ts | NC | -  | 4  |
| 37 | sf000518 |                |              | G/T | Tv | NC | -  | -  |
| 38 | sf000554 | BT059059.1     | GI:223648027 | C/T | Ts | C  | NS | 2  |
| 39 | sf000559 | XM_001502487   | GI:149728067 | A/G | Ts | NC | -  | -  |
| 40 | sf000583 | EF467299.1     | GI:154795566 | C/T | Ts | NC | -  | 8  |
| 41 | sf000584 | EU025714       | GI:158702319 | A/G | Ts | C  | -  | 10 |
| 42 | sf000612 | NM_001020538   | GI:66472671  | A/T | Tv | NC | -  | 37 |
| 43 | sf000633 |                |              | G/T | Tv | C  | -  | -  |
| 44 | sf000656 |                |              | A/G | Ts | NC | -  | 20 |
| 45 | sf000657 |                |              | C/T | Ts | NC | -  | 2  |
| 46 | sf000679 | BT060419       | GI:223673194 | C/T | Ts | NC | -  | -  |
| 47 | sf000684 | GU129140       | GI:213512874 | C/T | Ts | C  | -  | 34 |
| 48 | sf000706 | NP_001117688   | GI:185135493 | A/G | Ts | NC | -  | 6  |
| 49 | sf000717 |                |              | C/T | Ts | NC | -  | 18 |
| 50 | sf000719 |                |              | A/T | Tv | NC | -  | 16 |



|    |          |              |              |     |    |    |    |    |
|----|----------|--------------|--------------|-----|----|----|----|----|
| 51 | sf000744 |              |              | A/T | Tv | C  | NS | 5  |
| 52 | sf000747 |              |              | C/T | Ts | NC | -  | -  |
| 53 | sf000754 |              |              | A/C | Tv | NC | -  | 8  |
| 54 | sf000810 | BT045174     | GI:209154407 | C/T | Ts | NC | -  | 2  |
| 55 | sf000854 |              |              | G/T | Tv | NC | -  | -  |
| 56 | sf000878 |              |              | C/T | Ts | NC | -  | -  |
| 57 | sf000891 |              |              | A/C | Tv | C  | NS | 6  |
| 58 | sf000899 | EU025705     | GI:158702261 | C/T | Ts | NC | -  | 12 |
| 59 | sf000905 |              |              | A/T | Tv | C  | -  | 31 |
| 60 | sf000961 |              |              | C/T | Ts | NC | -  | 5  |
| 61 | sf000966 |              |              | A/G | Ts | NC | -  | 13 |
| 62 | sf000970 |              |              | A/G | Ts | C  | -  | 9  |
| 63 | sf000978 |              |              | A/G | Ts | NC | -  | 1  |
| 64 | sf000991 |              |              | A/T | Tv | C  | -  | -  |
| 65 | sf001069 |              |              | G/T | Tv | NC | -  | -  |
| 66 | sf001086 | NM_001141083 | GI:213513628 | C/T | Ts | NC | -  | -  |
| 67 | sf001105 |              |              | A/G | Ts | NC | -  | 17 |
| 68 | sf001164 |              |              | C/T | Ts | NC | -  | -  |
| 69 | sf001181 |              |              | A/G | Ts | C  | -  | -  |
| 70 | sf001184 | CR391965     | GI:167908776 | C/T | Ts | NC | -  | 1  |
| 71 | sf001196 |              |              | A/G | Ts | NC | -  | -  |
| 72 | sf001284 |              |              | G/T | Tv | NC | -  | 33 |
| 73 | sf001287 |              |              | C/T | Ts | C  | -  | -  |
| 74 | sf001288 |              |              | C/T | Ts | C  | NS | 2  |
| 75 | sf001353 |              |              | G/T | Tv | C  | -  | 5  |
| 76 | sf001359 | GQ505860     | GI:260182183 | A/G | Ts | NC | -  | -  |
| 77 | sf001394 |              |              | A/T | Tv | NC | -  | 6  |
| 78 | sf001437 |              |              | A/G | Ts | NC | -  | -  |

|     |          |              |              |     |    |    |    |    |
|-----|----------|--------------|--------------|-----|----|----|----|----|
| 79  | sf001546 |              |              | A/C | Tv | C  | NS | 28 |
| 80  | sf001601 |              |              | C/T | Ts | NC | -  | 8  |
| 81  | sf001644 |              |              | G/T | Tv | C  | -  | 2  |
| 82  | sf001661 |              |              | G/T | Tv | C  | -  | -  |
| 83  | sf001667 |              |              | A/G | Ts | C  | NS | 17 |
| 84  | sf001686 |              |              | A/G | Ts | NC | -  | -  |
| 85  | sf001692 |              |              | C/T | Ts | NC | -  | 12 |
| 86  | sf001740 |              |              | A/G | Ts | NC | -  | 7  |
| 87  | sf001770 |              |              | A/G | Ts | NC | -  | 21 |
| 88  | sf001812 | AC203446     | GI:163955243 | A/G | Ts | NC | -  | 9  |
| 89  | sf001831 |              |              | A/C | Tv | NC | -  | 40 |
| 90  | sf001846 |              |              | A/G | Ts | NC | -  | 30 |
| 91  | sf001880 | EF467300     | GI:154795567 | C/T | Ts | NC | -  | -  |
| 92  | sf001996 | DQ246664     | GI:80971723  | A/G | Ts | NC | -  | 28 |
| 93  | sf002018 |              |              | A/C | Tv | NC | -  | 25 |
| 94  | sf002024 |              |              | A/G | Ts | NC | -  | 3  |
| 95  | sf002033 | AJ311906     | GI:20873289  | A/T | Tv | C  | -  | 2  |
| 96  | sf002055 |              |              | A/G | Ts | C  | NS | 31 |
| 97  | sf002131 |              |              | A/G | Ts | C  | -  | 1  |
| 98  | sf002145 | XM_683887    | GI:292622326 | C/G | Tv | C  | NS | 31 |
| 99  | sf002155 |              |              | A/G | Ts | NC | -  | -  |
| 100 | sf002175 |              |              | C/T | Ts | NC | -  | 34 |
| 101 | sf002203 |              |              | A/G | Ts | C  | -  | 7  |
| 102 | sf002250 | XM_001920907 | GI:189520811 | A/C | Tv | C  | -  | 28 |
| 103 | sf002333 |              |              | A/G | Ts | NC | -  | -  |
| 104 | sf002353 | NM_001141843 | GI:213513502 | C/T | Ts | NC | -  | 20 |
| 105 | sf002439 |              |              | C/T | Ts | NC | -  | 31 |
| 106 | sf002633 | BT072804     | GI:224587929 | A/C | Tv | C  | -  | -  |

|     |          |              |              |     |    |    |    |    |
|-----|----------|--------------|--------------|-----|----|----|----|----|
| 107 | sf002640 |              |              | A/G | Ts | NC | -  | 21 |
| 109 | sf002721 |              |              | A/G | Ts | C  | -  | 32 |
| 110 | sf002948 | CAAE01015039 | GI:47222189  | G/T | Tv | C  | S  | 7  |
| 111 | sf003018 |              |              | A/G | Ts | NC | -  | 26 |
| 112 | sf003063 |              |              | A/C | Tv | NC | -  | 1  |
| 113 | sf003076 | EU025709     | GI:158702304 | A/G | Ts | NC | -  | 23 |
| 114 | sf003084 |              |              | A/G | Ts | C  | -  | 4  |
| 115 | sf003092 |              |              | C/T | Ts | C  | -  | 9  |
| 116 | sf003105 |              |              | C/T | Ts | NC | -  | 3  |
| 117 | sf003118 |              |              | A/G | Ts | NC | -  | 6  |
| 118 | sf003141 | BT056462     | GI:221219345 | A/T | Tv | NC | -  | 11 |
| 119 | sf003142 | CU062627     | GI:150171078 | A/G | Ts | NC | -  | -  |
| 120 | sf003197 |              |              | A/G | Ts | NC | -  | -  |
| 121 | sf003208 |              |              | C/T | Ts | NC | -  | -  |
| 122 | sf003334 |              |              | A/G | Ts | NC | -  | 24 |
| 123 | sf003382 |              |              | A/G | Ts | C  | NS | 14 |
| 124 | sf003407 |              |              | C/T | Ts | NC | -  | 10 |
| 125 | sf003442 |              |              | A/G | Ts | C  | -  | 24 |
| 126 | sf003455 |              |              | A/G | Ts | NC | -  | 11 |
| 127 | sf003500 | BT049606.1   | GI:209737075 | C/T | Ts | NC | -  | 1  |
| 128 | sf003520 |              |              | A/G | Ts | C  | S  | 2  |
| 129 | sf003538 | AL840630     | GI:41322894  | G/T | Tv | NC | -  | 9  |
| 130 | sf003560 |              |              | C/T | Ts | C  | S  | -  |
| 131 | sf003589 |              |              | C/T | Ts | C  | -  | -  |
| 132 | sf003595 |              |              | A/T | Tv | NC | -  | -  |
| 133 | sf003601 |              |              | C/T | Ts | NC | -  | -  |
| 134 | sf003610 |              |              | A/T | Tv | C  | -  | 1  |
| 135 | sf003611 |              |              | A/C | Tv | NC | -  | -  |

|     |          |              |              |     |    |    |    |    |
|-----|----------|--------------|--------------|-----|----|----|----|----|
| 136 | sf003614 | CAAE01014563 | GI:47223303  | G/T | Tv | NC | -  | 8  |
| 137 | sf003621 | BT059052     | GI:223648013 | C/T | Ts | NC | -  | -  |
| 138 | sf003633 |              |              | A/G | Ts | C  | S  | 21 |
| 139 | sf003639 | EF427381     | GI:148362130 | C/T | Ts | NC | -  | 30 |
| 140 | sf003647 |              |              | C/G | Tv | NC | -  | 40 |
| 141 | sf003697 |              |              | A/C | Tv | NC | -  | 37 |
| 142 | sf003698 |              |              | G/T | Tv | C  | -  | -  |
| 143 | sf003700 |              |              | C/T | Ts | NC | -  | 9  |
| 144 | sf003713 | XM_686639.3  | GI:189530935 | A/T | Tv | NC | -  | 25 |
| 145 | sf003715 | EU816603     | GI:209962458 | C/T | Ts | NC | -  | 11 |
| 146 | sf003724 |              |              | C/T | Ts | NC | -  | -  |
| 147 | sf003728 |              |              | C/T | Ts | C  | -  | 31 |
| 148 | sf003755 |              |              | G/T | Tv | NC | -  | 7  |
| 149 | sf003788 | XM_002660927 | GI:292611089 | G/T | Tv | NC | -  | -  |
| 150 | sf003813 | EU621898     | GI:187936476 | A/G | Ts | NC | -  | 8  |
| 151 | sf003836 |              |              | A/T | Tv | NC | -  | 15 |
| 152 | sf003897 |              |              | A/G | Ts | NC | -  | 10 |
| 153 | sf003899 |              |              | C/T | Ts | NC | -  | 11 |
| 154 | sf003919 | GQ505860     | GI:260182183 | C/T | Ts | NC | -  | 1  |
| 155 | sf003977 | EU481821     | GI:171474994 | C/G | Tv | NC | -  | -  |
| 156 | sf003994 |              |              | G/T | Tv | NC | -  | -  |
| 157 | sf004008 |              |              | A/G | Ts | C  | NS | -  |
| 158 | sf004013 | EU221180     | GI:159033051 | A/C | Tv | C  | NS | 38 |
| 159 | sf004016 |              |              | A/G | Ts | NC | -  | 2  |
| 160 | sf004030 | XM_689729    | GI:189528958 | A/T | Tv | NC | -  | 19 |
| 161 | sf004038 | NM_001165151 | GI:259089170 | A/G | Ts | NC | -  | 34 |
| 162 | sf004055 | XP_001921123 | GI:189530039 | A/T | Tv | C  | NS | 22 |
| 163 | sf004056 | EF467297     | GI:154795564 | C/T | Ts | C  | NS | -  |

|     |          |              |              |     |    |    |    |    |
|-----|----------|--------------|--------------|-----|----|----|----|----|
| 164 | sf004064 |              |              | A/C | Tv | NC | -  | 28 |
| 165 | sf004070 |              |              | A/G | Ts | NC | -  | 24 |
| 166 | sf004090 |              |              | C/G | Tv | C  | NS | -  |
| 167 | sf004099 |              |              | A/T | Tv | NC | -  | -  |
| 168 | sf004112 |              |              | A/G | Ts | NC | -  | -  |
| 169 | sf004131 | NM_001173900 | GI:291190431 | A/G | Ts | NC | -  | 40 |
| 170 | sf004149 | FJ969490     | GI:262189352 | C/G | Tv | NC | -  | 6  |
| 171 | sf004155 | EU025709     | GI:158702304 | G/T | Tv | NC | -  | -  |
| 172 | sf004192 |              |              | A/G | Ts | C  | -  | -  |
| 173 | sf004209 |              |              | A/T | Tv | NC | -  | -  |
| 174 | sf004211 |              |              | G/T | Tv | NC | -  | 3  |
| 175 | sf004214 |              |              | A/G | Ts | NC | -  | 6  |
| 176 | sf004240 | EU621900     | GI:187936480 | A/G | Ts | NC | -  | 6  |
| 177 | sf004252 | NM_001140784 | GI:213515209 | G/T | Tv | NC | -  | 5  |
| 178 | sf004254 | BT071904     | GI:224613219 | C/T | Ts | C  | -  | 13 |
| 179 | sf004257 | AB294121     | GI:149773365 | A/G | Ts | NC | -  | 3  |
| 180 | sf004260 |              |              | C/T | Ts | C  | -  | -  |
| 181 | sf004288 |              |              | A/G | Ts | C  | -  | -  |
| 182 | sf004299 | XM_001922165 | GI:189531595 | C/T | Ts | NC | -  | 10 |
| 183 | sf004319 | BT058994     | GI:223647897 | G/T | Tv | C  | -  | 23 |
| 184 | sf004353 | NM_001124574 | GI:185135642 | A/G | Ts | C  | S  | 40 |
| 185 | sf004357 | EU025708     | GI:158702285 | C/T | Ts | C  | NS | 4  |
| 186 | sf004373 |              |              | A/G | Ts | C  | -  | 5  |
| 187 | sf004379 |              |              | C/T | Ts | NC | -  | 15 |
| 188 | sf004387 |              |              | C/T | Ts | C  | -  | -  |
| 189 | sf004416 | GU129140     | GI:290760588 | A/C | Tv | NC | -  | 31 |
| 190 | sf004423 |              |              | A/G | Ts | C  | -  | -  |
| 191 | sf004426 |              |              | C/T | Ts | NC | -  | 24 |

|     |          |              |              |     |    |    |    |    |
|-----|----------|--------------|--------------|-----|----|----|----|----|
| 192 | sf004438 | BT045405     | GI:209154869 | C/T | Ts | C  | NS | 31 |
| 193 | sf004475 | EU621899     | GI:187936478 | C/T | Ts | C  | S  | 25 |
| 194 | sf004521 |              |              | C/G | Tv | NC | -  | 1  |
| 195 | sf004529 |              |              | A/T | Tv | NC | -  | 38 |
| 196 | sf004541 |              |              | A/C | Tv | NC | -  | 2  |
| 197 | sf004545 | EF427379     | GI:148362119 | A/C | Tv | NC | -  | -  |
| 198 | sf004560 |              |              | G/T | Tv | NC | -  | 3  |
| 199 | sf004562 |              |              | A/C | Tv | NC | -  | 7  |
| 200 | sf004583 | NM_001013274 | GI:61651703  | A/C | Tv | NC | -  | -  |
| 201 | sf004602 | XM_001922165 | GI:189531595 | A/G | Ts | NC | -  | -  |
| 202 | sf004614 |              |              | A/G | Ts | C  | -  | 13 |
| 203 | sf004624 | EU816603     | GI:209962458 | C/T | Ts | NC | -  | 10 |
| 204 | sf004632 | EU025707     | GI:158702273 | C/T | Ts | NC | -  | -  |
| 205 | sf004642 |              |              | A/G | Ts | NC | -  | 6  |
| 206 | sf004651 |              |              | A/G | Ts | C  | NS | 6  |
| 207 | sf004656 |              |              | A/C | Tv | NC | -  | 21 |
| 208 | sf004668 | FJ969489     | GI:262189345 | A/C | Tv | C  | -  | 38 |
| 209 | sf004684 |              |              | A/T | Tv | NC | -  | -  |
| 210 | sf004685 |              |              | A/G | Ts | NC | -  | 39 |
| 211 | sf004685 |              |              | A/G | Ts | C  | NS | 39 |
| 212 | sf004685 |              |              | C/G | Tv | C  | NS | -  |
| 213 | sf004714 | EU025714     | GI:158702319 | C/T | Ts | C  | -  | 27 |
| 214 | sf004715 |              |              | C/T | Ts | C  | -  | 10 |
| 215 | sf004732 | AB258536     | GI:118596560 | C/T | Ts | NC | -  | 29 |
| 216 | sf004741 |              |              | C/G | Tv | NC | -  | 31 |
| 217 | sf004762 |              |              | C/T | Ts | NC | -  | 18 |
| 218 | sf004765 |              |              | C/T | Ts | C  | NS | 4  |
| 219 | sf004774 |              |              | A/G | Ts | C  | -  | 3  |

|     |          |              |              |     |    |    |    |    |
|-----|----------|--------------|--------------|-----|----|----|----|----|
| 220 | sf004795 | BT057087     | GI:221220595 | C/T | Ts | NC | -  | 10 |
| 221 | sf004811 | EU025709     | GI:158702304 | A/T | Tv | C  | NS | 15 |
| 222 | sf004817 | EU025714     | GI:158702319 | C/G | Tv | NC | -  | -  |
| 223 | sf004818 | EU481821     | GI:171474994 | A/C | Tv | NC | -  | 2  |
| 224 | sf004828 | AJ716203     | GI:52673235  | A/T | Tv | NC | -  | -  |
| 225 | sf004839 |              |              | C/T | Ts | C  | -  | 39 |
| 226 | sf004848 | BT058155.1   | GI:223646219 | A/T | Tv | NC | -  | 17 |
| 227 | sf004870 |              |              | A/G | Ts | NC | -  | 7  |
| 228 | sf004890 | FJ969489     | GI:262189345 | A/C | Tv | NC | -  | -  |
| 229 | sf004897 |              |              | A/T | Tv | NC | -  | -  |
| 230 | sf004904 |              |              | C/G | Tv | NC | -  | -  |
| 231 | sf004909 | EU481821     | GI:171474994 | A/T | Tv | C  | NS | 13 |
| 232 | sf004913 | BT059404     | GI:223648717 | A/C | Tv | NC | -  | 4  |
| 233 | sf004917 | BT072749     | GI:224587877 | C/T | Ts | NC | -  | 12 |
| 234 | sf004938 | EU025708     | GI:158702285 | C/T | Ts | NC | -  | 9  |
| 235 | sf004975 | EU221176     | GI:159147122 | C/T | Ts | NC | -  | 31 |
| 236 | sf004977 | EU025707     | GI:158702273 | C/T | Ts | NC | -  | -  |
| 237 | sf004984 | NM_001140391 | GI:213511551 | A/G | Ts | C  | NS | 5  |
| 238 | sf005000 | DQ246664     | GI:80971723  | C/T | Ts | C  | NS | -  |
| 239 | sf005052 | BT058930     | GI:223647769 | A/G | Ts | C  | -  | -  |
| 240 | sf005054 | BT059612     | GI:223649133 | A/G | Ts | NC | -  | 3  |
| 241 | sf005079 |              |              | A/C | Tv | NC | -  | -  |
| 242 | sf005104 | EU025714     | GI:158702319 | A/C | Tv | NC | -  | -  |
| 243 | sf005138 | NM_001145584 | GI:224496041 | A/C | Tv | NC | -  | -  |
| 244 | sf005160 |              |              | A/C | Tv | C  | -  | 31 |
| 245 | sf005168 | BX537340     | GI:51592271  | A/C | Tv | C  | -  | 2  |
| 246 | sf005182 | SSSAT48S1    | GI:501083    | A/G | Ts | NC | -  | -  |
| 247 | sf005182 | SSSAT48S1    | GI:501083    | A/G | Ts | NC | -  | -  |

|     |          |              |              |     |    |    |    |    |
|-----|----------|--------------|--------------|-----|----|----|----|----|
| 248 | sf005186 |              |              | C/T | Ts | NC | -  | 39 |
| 249 | sf005248 | EU481821     | GI:171474994 | C/T | Ts | NC | -  | 9  |
| 250 | sf005258 | EU221180     | GI:159033051 | A/C | Tv | NC | -  | -  |
| 251 | sf005272 | EF467298     | GI:154795565 | C/G | Tv | NC | -  | -  |
| 252 | sf005286 |              |              | C/T | Ts | NC | -  | -  |
| 253 | sf005311 | GQ505859     | GI:260182171 | C/G | Tv | NC | -  | -  |
| 254 | sf005344 | GU129140     | GI:290760588 | A/T | Tv | C  | NS | 32 |
| 255 | sf005399 | AM748538     | GI:242098051 | A/T | Tv | C  | NS | -  |
| 256 | sf005409 | CR847272     | GI:55058237  | A/C | Tv | C  | NS | 8  |
| 257 | sf005410 | FJ969489     | GI:262189345 | A/C | Tv | NC | -  | -  |
| 258 | sf005420 |              |              | A/G | Ts | NC | -  | 38 |
| 259 | sf005440 |              |              | C/T | Ts | NC | -  | 21 |
| 260 | sf005440 |              |              | A/G | Ts | C  | S  | -  |
| 261 | sf005443 |              |              | C/G | Tv | C  | -  | 37 |
| 262 | sf005459 |              |              | A/C | Tv | NC | -  | 1  |
| 263 | sf005501 | BT072704     | GI:224587835 | A/G | Ts | NC | -  | 9  |
| 264 | sf005540 | EU816603     | GI:209962458 | C/T | Ts | C  | -  | 19 |
| 265 | sf005590 |              |              | C/T | Ts | C  | NS | 35 |
| 266 | sf005652 |              |              | A/G | Ts | NC | -  | 8  |
| 267 | sf005654 | NM_001165392 | GI:259155245 | C/T | Ts | C  | -  | -  |
| 268 | sf005663 |              |              | A/G | Ts | NC | -  | 1  |
| 269 | sf005695 |              |              | C/T | Ts | C  | -  | -  |
| 270 | sf005769 | NM_001140223 | GI:213511597 | A/G | Ts | NC | -  | 14 |
| 271 | sf005769 | NM_001140223 | GI:213511597 | C/T | Ts | NC | -  | 14 |
| 272 | sf005917 | EU221180     | GI:159033051 | C/T | Ts | NC | -  | -  |
| 273 | sf006000 | EU621898     | GI:187936476 | C/T | Ts | C  | -  | 35 |
| 274 | sf006000 | EU621898     | GI:187936476 | A/G | Ts | NC | -  | -  |
| 275 | sf006057 | XM_001919059 | GI:189519277 | A/G | Ts | C  | S  | -  |



|     |          |              |              |     |    |    |    |    |
|-----|----------|--------------|--------------|-----|----|----|----|----|
| 276 | sf006073 | BX927363     | GI:112183280 | A/G | Ts | C  | NS | 39 |
| 277 | sf006078 | BT059612     | GI:223649133 | A/T | Tv | NC | -  | -  |
| 278 | sf006081 | FJ969488     | GI:262189341 | G/T | Tv | NC | -  | 33 |
| 279 | sf006102 | GU129139     | GI:290760560 | A/C | Tv | C  | NS | -  |
| 280 | sf006197 | NM_001140134 | GI:213511349 | A/T | Tv | NC | -  | -  |
| 281 | sf006410 | XM_002663717 | GI:292618742 | A/G | Ts | NC | -  | 9  |

---

**Table S4 Sequences of the contig build from the assembly of the 454 raw data**

Table S4 is available for download at <http://www.g3journal.org/lookup/suppl/doi:10.1534/g3.111.001867/-/DC1>.

**Table S5** Description of the consensus and sex-specific linkage maps build using Crimap in brook charr, *Salvelinus fontinalis*. SNP: single nucleotide polymorphism; Msats: microsatellites

| Map | Consensus     |                               |                   | Female                      |                               |                   | Male                        |                               |                   |
|-----|---------------|-------------------------------|-------------------|-----------------------------|-------------------------------|-------------------|-----------------------------|-------------------------------|-------------------|
|     | Linkage group | Number of markers (SNP/Msats) | Total length (cM) | Average marker spacing (cM) | Number of markers (SNP/Msats) | Total length (cM) | Average marker spacing (cM) | Number of markers (SNP/Msats) | Total length (cM) |
| 1   | 16 (11/5)     | 132.2                         | 8.26              | 16 (11/5)                   | 187                           | 11.6              | 16 (11/5)                   | 77.8                          | 4.23              |
| 2   | 16 (11/5)     | 130.2                         | 8.14              | 16 (11/5)                   | 169.3                         | 10.5              | 16 (11/5)                   | 65.4                          | 4.08              |
| 3   | 15 (10/5)     | 95.7                          | 6.38              | 15 (10/5)                   | 101.1                         | 6.74              | 15 (10/5)                   | 33.3                          | 2.22              |
| 4   | 8 (6/2)       | 73.2                          | 9.15              | 8 (6/2)                     | 65.4                          | 8.2               | 8 (6/2)                     | 24.1                          | 3.01              |
| 5   | 11 (6/5)      | 95.2                          | 8.65              | 11 (6/5)                    | 70.3                          | 6.39              | 11 (6/5)                    | 28.3                          | 2.57              |
| 6   | 11 (9/2)      | 77.5                          | 7.04              | 11 (9/2)                    | 67.8                          | 6.2               | 11 (9/2)                    | 25.9                          | 2.35              |
| 7   | 9 (6/3)       | 46.6                          | 5.17              | 9 (6/3)                     | 34.5                          | 3.8               | 9 (6/3)                     | 12.3                          | 1.36              |
| 8   | 11 (8/3)      | 81.2                          | 7.38              | 10 (7/3)                    | 129.3                         | 12.9              | 10 (7/3)                    | 44.2                          | 4.42              |
| 9   | 10 (9/1)      | 82.3                          | 8.23              | 10 (9/1)                    | 45.4                          | 4.5               | 10 (9/1)                    | 26.5                          | 2.65              |
| 10  | 9 (8/1)       | 63.6                          | 7.06              | 9 (8/1)                     | 43.6                          | 4.8               | 8 (7/1)                     | 17.8                          | 2.22              |
| 11  | 8 (4/4)       | 70.1                          | 8.76              | 8 (4/4)                     | 64.4                          | 8.1               | 8 (4/4)                     | 25.9                          | 3.23              |
| 12  | 6 (4/2)       | 78.4                          | 13.06             | 6 (4/2)                     | 58.1                          | 9.7               | 6 (4/2)                     | 24.8                          | 4.13              |
| 13  | 7 (5/2)       | 74                            | 10.57             | 7 (5/2)                     | 67.9                          | 9.7               | 7 (5/2)                     | 26.9                          | 3.84              |
| 14  | 6 (4/2)       | 68.5                          | 11.41             | 6 (4/2)                     | 52.1                          | 8.7               | 6 (4/2)                     | 21.3                          | 3.55              |
| 15  | 6 (5/1)       | 52.6                          | 8.76              | 6 (5/1)                     | 42.6                          | 7.1               | 6 (5/1)                     | 17.4                          | 2.9               |
| 16  | 4 (1/3)       | 42.8                          | 10.7              | 4 (1/3)                     | 29.9                          | 7.4               | 4 (1/3)                     | 11.9                          | 2.97              |
| 17  | 6 (4/2)       | 30.3                          | 5.05              | 6 (4/2)                     | 27.5                          | 4.6               | 6 (4/2)                     | 21.3                          | 1.83              |
| 18  | 5 (2/3)       | 24.9                          | 4.98              | 5 (2/3)                     | 34.5                          | 6.9               | 5 (2/3)                     | 6.9                           | 1.38              |
| 19  | 4 (3/1)       | 61.1                          | 15.27             | 4 (3/1)                     | 66.8                          | 16.7              | 4 (3/1)                     | 22.4                          | 5.6               |
| 20  | 5 (3/2)       | 67.2                          | 13.44             | 5 (3/2)                     | 71.2                          | 14.2              | 5 (3/2)                     | 21.9                          | 4.38              |
| 21  | 6 (5/1)       | 60.7                          | 10.11             | 6 (5/1)                     | 61.2                          | 10.2              | 6 (5/1)                     | 20.4                          | 3.4               |

|              |            |               |             |            |               |             |            |              |            |
|--------------|------------|---------------|-------------|------------|---------------|-------------|------------|--------------|------------|
| 22           | 5 (2/3)    | 45.8          | 9.16        | 5 (2/3)    | 77.8          | 15.6        | 5 (2/3)    | 27.1         | 5.42       |
| 23           | 4 (3/1)    | 29.2          | 7.3         | 4 (3/1)    | 33.9          | 8.5         | 4 (3/1)    | 11.4         | 2.85       |
| 24           | 5 (4/1)    | 49.3          | 9.86        | 5 (4/1)    | 66.1          | 13.2        | 5 (4/1)    | 20.3         | 4.06       |
| 25           | 4 (4/0)    | 29.8          | 7.45        | 4 (4/0)    | 35.6          | 8.9         | 4 (4/0)    | 11.2         | 2.8        |
| 26           | 3 (2/1)    | 11.5          | 3.83        | 3 (2/1)    | 34.1          | 11.4        | 3 (2/1)    | 4.5          | 1.5        |
| 27           | 3 (2/1)    | 27.8          | 9.26        | 3 (2/1)    | 43.5          | 14.5        | 3 (2/1)    | 11.5         | 3.83       |
| 28           | 4 (4/0)    | 3.9           | 0.975       | 4 (4/0)    | 23.1          | 5.7         | 4 (4/0)    | 2.8          | 0.7        |
| 29           | 2 (1/1)    | 42.3          | 21.15       | 2 (1/1)    | 44.4          | 22.2        | 2 (1/1)    | 24.5         | 12.25      |
| 30           | 3 (2/1)    | 63.9          | 21.3        | 3 (2/1)    | 22.4          | 7.5         | 3 (2/1)    | 32.3         | 10.76      |
| 31           | 17 (13/4)  | 72.3          | 4.25        | 16 (12/4)  | 121.2         | 7.5         | 15 (11/4)  | 41.9         | 2.79       |
| 32           | 3 (2/1)    | 59.1          | 19.7        | 3 (2/1)    | 78.5          | 26.2        | 3 (2/1)    | 32.5         | 10.83      |
| 33           | 2 (2/0)    | 1.4           | 0.7         | 2 (2/0)    | 3.6           | 1.8         | 2 (2/0)    | 1.1          | 0.55       |
| 34           | 3 (3/0)    | 41.8          | 13.93       | 3 (3/0)    | 66.1          | 22.1        | 3 (3/0)    | 24.5         | 8.16       |
| 35           | 3 (3/0)    | 2.4           | 0.8         | 3 (3/0)    | 11.5          | 3.8         | 3 (3/0)    | 3.8          | 1.26       |
| 36           | 3 (2/1)    | 29.1          | 9.7         | 2 (1/1)    | 48.7          | 24.3        | 3 (2/1)    | 20.3         | 6.76       |
| 37           | 3 (3/0)    | 6.5           | 2.16        | 3 (3/0)    | 12.7          | 4.2         | 3 (3/0)    | 4.5          | 1.5        |
| 38           | 11 (5/6)   | 12.9          | 1.17        | 11 (5/6)   | 24.1          | 2.2         | 10 (4/6)   | 5.9          | 0.59       |
| 39           | 5 (5/0)    | 4.5           | 0.9         | 5 (5/0)    | 5.2           | 1.1         | 5 (5/0)    | 2.1          | 0.42       |
| 40           | 4 (4/0)    | 5.6           | 1.4         | 4 (4/0)    | 5.9           | 1.4         | 4 (4/0)    | 2.4          | 0.6        |
| <b>Total</b> | <b>266</b> | <b>2047.4</b> | <b>8.31</b> | <b>263</b> | <b>2248.3</b> | <b>9.53</b> | <b>261</b> | <b>861.3</b> | <b>3.6</b> |
