# Supplementary material for: Coding Gene Single Nucleotide Polymorphism Mapping and Quantitative Trait Loci Detection for Physiological Reproductive Traits in Brook Charr,Salvelinus fontinalis
Source: Oxford University Press journal article supplement (doi:10.1534/g3.111.001867), 2012-03-01
Supplement: 379_tables1.pdf [file 379_tables1.pdf]

**Table S1** Description of the SSR markers used to build the linkage map in the Brook charr, *Salvelinus fontinalis*

| Marker              | Primer F et R                                     | Annealing Temperature | Accession Number | Associated publication |
|---------------------|---------------------------------------------------|-----------------------|------------------|------------------------|
| 1 BHMS206           | CCAATAACTGACAAGTGAG<br>CAGAGGTTGATAATGGGG         | 54                    | AF256680         | Timusk et al. 2011     |
| 2 BHMS238           | GATAATGCCTGGATGTGC<br>CTAGAGCCGACCCTTTAC          | 54                    | AF256682         | Timusk et al. 2011     |
| 3 BHMS272           | AGCTTGACAGCAGCTTGG<br>TGCAATGCAGACTGACTG          | 54                    | AF256690         | Timusk et al. 2011     |
| 4 BHMS331           | CAGCACCAGAACATAACC<br>AGCCATCAACACTCCCTG          | 54                    | AF256744         | Timusk et al. 2011     |
| 5 BHMS377           | TGGCTACAACAGGGATAC<br>AGTCTCTTACATGGAGGC          | 54                    | AF256707         | Timusk et al. 2011     |
| 6 BHMS417/i/ii/iii/ | ACATAGACCATGACGCTC<br>TGACACGCTCTCTGATCC          | 54                    | AF256752         | Timusk et al. 2011     |
| 7 BHMS429           | CCCCTGTCAAACGTCTTC<br>AGCACACTGGATTCAAGG          | 54                    | AF256719         | Thorsen et al., 2005   |
| 8 BHMS465/i/ii      | ACTCATCAACTGAGCCCC<br>GTGATCTGTAGTTTTCCATC        | 54                    | AF256857         | Timusk et al. 2011     |
| 9 BHMS7.011         | GGGACAGCTAATGGATCG<br>GTTTTAGTAATCGGAGTGTG        | 54                    | AF256834         | Timusk et al. 2011     |
| 10 BX073647/i/ii    | TATGGCTTTCCAAACAAAG<br>ACAGGGGGTTAACAGTGACA       | 54                    | BX073647         | Timusk et al. 2011     |
| 11 BX073974         | TGTACGGAAAGATGGGCTCC<br>CTCGAAGTACCCAAACAGC       | 54                    | BX073974         | Timusk et al. 2011     |
| 12 BX076085         | AAGACAGGAGATGAAGACACCG<br>ATATGTCGTGGGAAACATGTAGG | 54                    | BX076085         | Timusk et al. 2011     |
| 13 BX079862         | TGTGAGAAGAACACGAGAGTTGG                           | 54                    | BX079862         | Timusk et al. 2011     |

|    |               |                          |    |          |                    |
|----|---------------|--------------------------|----|----------|--------------------|
|    |               | GAATGAGGTGTTAGAACGACTGC  |    |          |                    |
| 14 | BX087664/i/ii | ATAGCCAGAGGGAAGCCTGC     | 54 | BX087664 | Timusk et al. 2011 |
|    |               | GCATCTCCAGCAGTCATTTGG    |    |          |                    |
| 15 | BX299451      | CCTGGTCTCCTTCACTTCA      | 54 | BX299451 |                    |
|    |               | CTGTGCTTACTGGGCAACTT     |    |          |                    |
| 16 | BX305863      | TACTGTACAGGATGGGTCTCTGC  | 54 | BX305863 | Timusk et al. 2011 |
|    |               | GGAGTACTACGTGTGAGGATTGG  |    |          |                    |
| 17 | BX311224      | CCGTGTGAAACCTGCATCC      | 54 | BX311224 | Timusk et al. 2011 |
|    |               | CCTTGGAAATGCTTACCCTACC   |    |          |                    |
| 18 | BX311884/i/ii | TGGACAACCTCAGCAAGGACC    | 54 | BX311884 | Timusk et al. 2011 |
|    |               | TGGTGACAGTTTCTGCTGAACC   |    |          |                    |
| 19 | BX313739      | CATGGAGTGTAAGGCAGGGC     | 54 | BX313739 | Timusk et al. 2011 |
|    |               | CGACAGATCAGCATCGCTGC     |    |          |                    |
| 20 | BX318599      | GATTTTCTGACCAGCACCTCC    | 54 | BX318599 | Timusk et al. 2011 |
|    |               | CCAACTGGACCCAGAACAGC     |    |          |                    |
| 21 | BX319197      | CGTCATCCATGTATGTTTCATGC  | 54 | BX319197 | Timusk et al. 2011 |
|    |               | GACAACTCACACATCCACATGG   |    |          |                    |
| 22 | BX319411/i/ii | GCTGTGGCCCTCTGTCATAACC   | 54 | BX319411 | Timusk et al. 2011 |
|    |               | GACATCAACGTGACACCAGGC    |    |          |                    |
| 23 | BX861121/i/ii | CCTTCATCAAGGATGCAGCC     | 50 | BX861121 | Timusk et al. 2011 |
|    |               | TATGTTTCCCAGTACATACCGGG  |    |          |                    |
| 24 | BX870052/i/ii | CAGATGAAATTGATCCAGATGACG | 54 | BX87005  | Timusk et al. 2011 |
|    |               | GGAAGGGGATGATGTGATTGG    |    |          |                    |
| 25 | BX873441      | GAAGAGTTCCGGTCCATCGG     | 54 | BX873441 | Timusk et al. 2011 |
|    |               | CGTGCATGTAATTCAGCCTGC    |    |          |                    |
| 26 | BX881655      | AGAAAGACCTGGCAAGGACC     | 54 | BX881655 | Timusk et al. 2011 |
|    |               | CCTCTGGCACAACTCCAGC      |    |          |                    |
| 27 | BX890355/i/ii | ACTGAGAACACTTCAGCCAAGG   | 54 | BX890355 | Timusk et al. 2011 |

---

|    |               |                                                                        |    |          |                      |
|----|---------------|------------------------------------------------------------------------|----|----------|----------------------|
| 28 | CA060381      | ACCCACTAGCTGCTACATTATGG<br>AGTGGTGAAGTGGGATGGGG<br>CCCGATGCTTTCTTCATGG | 54 | CA060381 | Rise et al., 2004    |
| 29 | CA061336      | TGCCATGTTTATTGAAATGCC<br>GGATCCAAAGGAGAGACTCCTG                        | 52 | CA061336 | Rise et al., 2004    |
| 30 | CA344270      | CACACTTCCTGGACCACTTCC<br>TTCAAACTAGGGATTTCTGTTGC                       | 54 | CA344270 | Rexroad et al., 2003 |
| 31 | CA345149      | ACCACCTCAGAGTGTCTTTCTCC<br>GACTTGACATACAAACGACGTGG                     | 54 | CA345149 | Rexroad et al., 2003 |
| 32 | CA350064      | GACCTGGTTTCGGTGCAGAGC<br>CCACTGTGAAGTTAGGTGTTCCC                       | 54 | CA350064 | Rexroad et al., 2003 |
| 33 | CA368462/i/ii | CGACAGACTCAGACCACTGTCC<br>CGACAGACTCAGACCACTGTCC                       | 56 | CA368462 | Rexroad et al., 2003 |
| 34 | CA376300/i/ii | TTAAGCACTAAGGGGAAGACGG<br>TGGGGTGAAGCAAAGAGC                           | 54 | CA376300 | Rexroad et al., 2003 |
| 35 | CA378164      | GAACGGGGTGTCTAGATGG<br>CCCTGACCTGCCTCTTTGG                             | 54 | CA378164 | Rexroad et al., 2003 |
| 36 | CL4778        | GAGGATACTGCCATTCAACA<br>ACGGTCCCACCTTACCATAAA                          | 54 | NA       |                      |
| 37 | Clock3-7C2-3  | GAGTACTGCCCTGCAGGTTG<br>TTGACCATGGCCCTTATG                             | 54 | NA       | Timusk et al. 2011   |
| 38 | CR363293      | TCCGCAACAAGTACGCTGG<br>TTCTCTTCTGGCAACTTCAGACC                         | 54 | CR363293 | Timusk et al. 2011   |
| 39 | Ogo4UW        | GTCGTCCTGGCATCAGCTA<br>GAGTGGAGATGCAGCCAAAG                            | 54 | AF009796 | Olsen et al., 1998   |
| 40 | Omi30TUF/i/ii | AGAAGACGAAGTGGATGCTG<br>GTCACCGTTTCTTTACCTGC                           | 54 | NA       | Timusk et al. 2011   |

---

|    |              |                                                     |    |          |                       |
|----|--------------|-----------------------------------------------------|----|----------|-----------------------|
| 41 | Omi126TUF    | TTAAAGGAAACACACGCATACG<br>TTCACACGACCGTTGGTG        | 54 | NA       | Timusk et al. 2011    |
| 42 | Omi179TUF    | TTATCCTAGTGCCGGGTCTG<br>ATGCAGCTTTTCAGTGGCTT        | 54 | NA       | Timusk et al. 2011    |
| 43 | OkeSLINRA    | GAAAATAACTATAGACATTGCTGG<br>CGTCCTTACACTCCAGAGGG    | 54 | NA       | Sakamoto et al., 2000 |
| 44 | OMM1195      | GCGAGGTTAGGATACACACAT<br>CTTCAGCCTGGAAACACAA        | 54 | AF469980 | Timusk et al. 2011    |
| 45 | OMM1197/i/ii | CTAGGAGAACAAGAAGACCATCGC<br>AGGACAGAAAGGAGGTAAAACGG | 54 | AF469982 | Timusk et al. 2011    |
| 46 | OMM1201      | CCGAAAAGCTAGGGAGAG<br>CCCTTCTGTATCCATTCCGTT         | 54 | AF469986 |                       |
| 47 | OMM1205      | AAACGGTGCCTCCTCCTCTATA<br>CCCAAGCCAATAAAGCCCTTACAT  | 54 | AF469990 | Timusk et al. 2011    |
| 48 | OMM1210      | CATCAGACAGCACAGAGCAG<br>GGAGGAGCAAGCCTTCTAAC        | 54 | AF469994 | Timusk et al. 2011    |
| 49 | OMM1211      | ACCCACTCTCCACTCAGTATT<br>GAAGGAGGCTTGAAGTGATC       | 54 | AF469995 | Timusk et al. 2011    |
| 50 | OMM1220      | CTCTGGGACAGACTTATCAC<br>CTATTGGACGATGCACAC          | 54 | AF470002 | Timusk et al. 2011    |
| 51 | OMM1228      | CCCTTCTGTGTGTCGTTGTT<br>CAGGAGTCACTTGGCAGTAGGAG     | 54 | AF470009 | Timusk et al. 2011    |
| 52 | OMM1237/i/ii | GTCAGAGTCGTGGGTATCAA<br>CAGAGTTTCCACGGTCACT         | 54 | AF470017 | Timusk et al. 2011    |
| 53 | OMM1238      | CGGAAATACGGAGGCTACTGTTG<br>CTTCTCCCTGGCATCTTTCATCAG | 54 | AF470018 | Timusk et al. 2011    |
| 54 | OMM1263/i/ii | CTGCATTCCAATACTCCACAG<br>TGGACGAACACTGGATCAG        | 54 | AF470029 | Timusk et al. 2011    |

|    |              |                                                        |    |          |                        |
|----|--------------|--------------------------------------------------------|----|----------|------------------------|
| 55 | OMM1290      | GCCTCAGCACTGTCTTAA<br>CGGAGGTCCTAGAGA                  | 54 | AF470050 | Timusk et al. 2011     |
| 56 | OMM1329      | GGGAAGTGTTACCATTACACAAG<br>CATCCAGGAACGCACCTTTA        | 54 | G73564   | Palti, Y et al., 2002  |
| 57 | OMM1345      | CCCTGGATTCTCCTGTTAG<br>ACATAGACACAGCACTCATGG           | 54 | G73576   | Palti, Y et al., 2002  |
| 58 | OMM1372/i/ii | CACTTCATGATGCCGAAAGCAG<br>CCCCATCATGACTCCTTCTAGTT      | 54 | BV005159 | Palti, Y et al., 2002  |
| 59 | OMM1445      | CTGCGTTATTGGTAGCTTGTG<br>CCCGGTAATGTAGTTCCTGTC         | 54 | BV079589 | Timusk et al. 2011     |
| 60 | OMM1459      | GCAGGTATTCAGGTAGGTCAG<br>AATGACCATGGAAAACAACAC         | 54 | BV079593 | Timusk et al. 2011     |
| 61 | OMM1512      | TTTCAAATCAGCCCAGGTTA<br>AGGAAAAGGCAGGATGGTAT           | 54 | BV212048 | Coulibaly et al., 2005 |
| 62 | OMM1579      | CTAGGCTCTGTGAATCTGA<br>GAAGGAATAAGACTGTCCG             | 54 | BV212097 | Coulibaly et al., 2005 |
| 63 | OMM3015/i/ii | ACTCTTGCGCTGGTTGTATG<br>GAAGAGTGTGAAAGTTGGCTG          | 54 | BV718488 | Timusk et al. 2011     |
| 64 | OMM3075      | CATTTAATTGAGCTGGCCAC<br>CCAGACAGTTCTGAGCAACC           | 54 | BV676508 | Timusk et al. 2011     |
| 65 | OMM3095      | CTTCCATTGAGGTTAGAGCAC<br>CCAGGTGTGAAAGGGTTTG           | 54 | BV676517 | Timusk et al. 2011     |
| 66 | OMM5000/i/ii | AACAGAGCAGTGAGGGGACTGAGA<br>CAAGTGATGTTGGTGCGAGGG      | 54 | CO805106 | Timusk et al. 2011     |
| 67 | OMM5007      | AGATGCCTGTCGAGTGTG<br>GAGGAGCATCATTTAGAGACTACA         | 54 | CO805113 | Timusk et al. 2011     |
| 68 | OMM5008      | CTGTTTCGTTGCTCATATCAACC<br>TCCATTATCCAATCAGGAGAGCTCTAT | 54 | CO805114 | Timusk et al. 2011     |

|    |              |                                                          |    |          |                        |
|----|--------------|----------------------------------------------------------|----|----------|------------------------|
| 69 | OMM5014/i/ii | GGGTCTGAAAGGAGCATGG<br>GGAACCTAACATGACGCAACA             | 54 | CO805119 | Timusk et al. 2011     |
| 70 | OMM5018      | GAAGGAACGGAACAGAGTGGTAATCAC<br>TCGGACAGGTAACCTGGAACGGAT  | 54 | CO805123 | Timusk et al. 2011     |
| 71 | OMM5019      | CATGCTGCCTCTCACCGTTTA<br>AACACACCCAGCATCCAACC            | 54 | CO805124 | Timusk et al. 2011     |
| 72 | OMM5056      | TCACCATCACCTTCATCGCCT<br>ACATGCTGCCCTTTGACGGAG           | 54 | CA349207 | Rexroad et al., 2003   |
| 73 | OMM5060      | TCTCGGGCCAAACCTTCTTATTGC<br>AGCCACTACATCTCCACGCCCTT      | 54 | CA348688 | Rexroad et al., 2003   |
| 74 | OMM5061      | GCGTTGGGAGAGAACAATACC<br>CCCATCACACCAGTTGCC              | 54 | CA348688 | Rexroad et al., 2003   |
| 75 | OMM5074      | TCGCTTTGGGTAGAAGTTGCCTTTAAC<br>AACATTAAGAACGAGTGAATCACGC | 54 | CA348721 | Rexroad et al., 2003   |
| 76 | OMM5091      | GCAGGAAAAACACCCAGATACAA<br>ACACTGGCTGGTGTCTTACATTA       | 54 | CA348850 | Rexroad et al., 2003   |
| 77 | OMM5102/i/ii | ATTCAAATAACAGGTGCTACTGGTC<br>CTGGTAACTAGGCAACTGATTGTGTC  | 54 | CA348955 | Rexroad et al., 2003   |
| 78 | OMM5113      | TCGGTAACAAGTCTCTAGACCACA<br>CAGAGACCTAGACTGAGTCATGTCCTG  | 54 | CA349018 | Rexroad et al., 2003   |
| 79 | OMM5146      | GACAGATTCATGCAAGCCT<br>CCTCACTACTTGCCAATCA               | 54 | BV211874 | Coulibaly et al., 2005 |
| 80 | OMM5147      | CACTGTATGTTCTTACCCTG<br>TATACTGGCTGAGTTCAACC             | 54 | BV211875 | Coulibaly et al., 2005 |
| 81 | OMM5155i/ii  | GGACAGAACTGCCACTAAGTGTG<br>GAGGAGACAGGGAAGAGCTATTG       | 54 | BV211883 | Coulibaly et al., 2005 |
| 82 | OMM5161/i/ii | CAAGTGCCTTTGAGCAC<br>AGCAACTGCTGACTCC                    | 54 | BV211889 | Coulibaly et al., 2005 |

|    |                    |                                                      |    |          |                        |
|----|--------------------|------------------------------------------------------|----|----------|------------------------|
| 83 | OMM5176            | CCACTTGCTGCTTCTCTACATA<br>AAGAACACCTAGCCAATAACCC     | 54 | BV211902 | Coulibaly et al., 2005 |
| 84 | OMM5179            | CCCTGTCACATGGATGCT<br>GATTTGGCAACCGAACAC             | 54 | BV211905 | Coulibaly et al., 2005 |
| 85 | OMM5312/i/ii/iii   | ACTGTCAGCAGCAATACACT<br>CCCATTTTCTCTTGTCACAC         | 54 | BV21202  | Coulibaly et al., 2005 |
| 86 | Omy6DIAS           | CCACCAACTTCTTACATGAT<br>CTATGGGGACAGCCGAATAA         | 54 | AF239042 | Timusk et al. 2011     |
| 87 | Omy21INRA/i/ii/iii | GCATTGGCGTAATGAGAAGG<br>CTGACGGACATATCAGCCC          | 54 | NA       | Gharbi et al., 2006    |
| 88 | OmyRGT2TUF         | ATAATGTGTCCCAGGCAAG<br>GAGGATGCGTCTTTGCATCT          | 54 | AB087587 | Sakamoto et al., 2000  |
| 89 | OmyRT16TUF         | TGGCTGAGTTATACATGGAACG<br>TCAATCAGGAGCAGTTAAAACA     | 54 | NA       | Timusk et al. 2011     |
| 90 | Otsclock1b_44_L_2  | TGCTACTGTGGCAACCTTTG<br>CCTGAGAGAGATGAGGGAGAGA       | 54 | NA       |                        |
| 91 | Sal5UoG            | TTTGCATTGAGCCTCTGTTG<br>TGTTTCAGCTGCTATTAGGAAT       | 54 | NA       | Timusk et al. 2011     |
| 92 | Sal9UoG/i/ii/iii   | TCACTGCTTCAAGGTATTTTACTT<br>AATTAGAGCTGCTAGGTCAGTGAG | 54 | NA       | Timusk et al. 2011     |
| 93 | SalD25SFU          | GATCTACACAGACCCACC<br>CCGTTCTTCCAATAACTGCTC          | 54 | AF537305 | McGowan et al., 2004   |
| 94 | SalD39SFU          | GGGGAGTCTGTGTTAAGTTGG<br>TGAATGGACGTTCTCTGAC         | 54 | AF537310 | McGowan et al., 2004   |
| 95 | SalE38SFU          | CGCCTTGCATACATTACACC<br>CCGTTCTTCCAATAACTGCTC        | 54 | AF537309 | McGowan et al., 2004   |
| 96 | SalF41SFU          | ATCCGCTATGAACCACAGG<br>ACTGCTCCGGCAACTACAG           | 54 | AF537306 | McGowan et al., 2004   |

|     |                  |                                                   |    |          |                       |
|-----|------------------|---------------------------------------------------|----|----------|-----------------------|
| 97  | Ssa0017BSFU      | CGCAACAGGCTTAGTTAGAT<br>CAACATTGAGTTCCCTTCAT      | 54 | AF019154 | Timusk et al. 2011    |
| 98  | Ssa0033BSFU      | ATTCTTGATCGTGGTCTTTG<br>CCGTTCTTCCAATAACTGCTC     | 54 | NA       | Phillips et al., 2009 |
| 99  | Ssa0072BSFU      | TCCGAAGATAGGGGAGGTT<br>ATAAACATCTGGGTGGCTGC       | 54 | NA       | Phillips et al., 2009 |
| 100 | Ssa0080BSFU/i/ii | CTACTGCACAGCACCTGGAA<br>CACAGAGCACCTCCTGAACA      | 54 | NA       | Phillips et al., 2009 |
| 101 | TC126859j/ii     | TTTTCTCCCTTTGACGACAG<br>TGGTTGTGACTCGATGTCTG      | 54 | NA       | Phillips et al., 2009 |
| 102 | C113             | GGAGCCCAGACTATATTGACG<br>CCTTGAAGTCTTGCCAGAT      | 64 | NA       | King TL, unpublished  |
| 103 | B52              | GCACACGAAACCAGTATATTTT<br>TTGTCTTGGTGATTTGAGAGC   | 64 | NA       | King TL, unpublished  |
| 104 | C28              | CAGTTGAAGTGATTGGGTTAGC<br>TCATCCTTAAAGCAGAATACCAC | 64 | NA       | King TL, unpublished  |
| 105 | C129             | AGTGGGTACAACATACCTTTGG<br>AGGTATTCACACCTCAGATTGG  | 64 | NA       | King TL, unpublished  |
| 106 | C88              | TAGTCTCTGGTGGGAATAATG<br>ATATCAGCCATAAGAGCTGGAG   | 60 | NA       | King TL, unpublished  |
| 107 | C24              | GCTACTGTTGGATTTATCTCAG<br>ATCACAGAGATGGGGTGATG    | 60 | NA       | King TL, unpublished  |
| 108 | D100             | ACCTTTGACCTGTACATCGTG<br>CAGACCTAGACTAAAGCATCCG   | 60 | NA       | King TL, unpublished  |
| 109 | D75              | GTAGTGCCAAAACAGGTAGAGC<br>CATCCTTATTCCAACCTCAATC  | 60 | NA       | King TL, unpublished  |
| 110 | C86              | ACCGATGGCCTTCAACAC<br>ATAGGCCCTACCTCAAACC         | 60 | NA       | King TL, unpublished  |



|     |         |                                                 |    |    |                        |
|-----|---------|-------------------------------------------------|----|----|------------------------|
| 111 | Sfo266  | CTGGCAGCATTGTAAAGAAG<br>CTGGGTGATTTGACGACC      | 64 | NA | Perry et al., 2005     |
| 112 | Sco216  | CCTTGTGAGAGCTAAGGTAGTG<br>GGAGGACATATTCCAACTTTG | 64 | NA | Dehaan and Ardren 2005 |
| 113 | Sfo262  | CCCATGTCAGTATTGGACTC<br>CTTCATGGGCAGAATGGAC     | 64 | NA | Perry et al., 2005     |
| 114 | Sco218  | TTCTAACTGTTGGCACTCTG<br>GTGTGGTTGGGTGGTAAG      | 60 | NA | Dehaan and Ardren 2005 |
| 115 | SFO241  | CTCCATTAGAAAGGGTTTG<br>CCAGTCTTTAGTCAACGC       | 60 | NA | King TL, unpublished   |
| 116 | SFO091  | AAATAACAACAATATGTGAGAAC<br>TATGCTGATATTGACTTTGG | 60 | NA | King TL, unpublished   |
| 117 | SFO308  | CAGCAATGGGGCTGAAGTAG<br>GTCACTGTGTGAATCCTCC     | 60 | NA | Perry et al., 2005     |
| 118 | SFO269  | GTAGATGAAACCTGATGG<br>GTTCTATGGTCACATACTG       | 60 | NA | Perry et al., 2005     |
| 119 | SFOD105 | CAGGGAAAATGCTAATGTGC<br>GGTTGTGTCGAATGGAGTTC    | 60 | NA | King TL, unpublished   |
| 120 | Ssa85   | AGCTGGGCCTCCAAGCTAC<br>ACCCGCTCCTCACTTAATC      | 60 | NA | King TL, unpublished   |
| 121 | SFOC115 | CAGTTTCTATCTCCAGGCAATC<br>TTCTGAAAGCACTCAACATGG | 60 | NA | King TL, unpublished   |
| 122 | SSA197  | GGGTTGAGTAGGGAGGCTTG<br>TGGCAGGGATTTGACATAAC    | 60 | NA | O'Reilly et al., 1996  |
| 123 | SFO12   | GGTTTTGAAGAGTGACAG<br>CCCGTTTCACAATCAGAG        | 60 | NA | Angers et al., 1995    |
| 124 | SFO177  | CGAATGTGGAGCTGAACTG<br>GGGTATTTGTACAATGGGT      | 60 | NA | Perry et al., 2005     |

|     |        |                                                     |    |    |                       |
|-----|--------|-----------------------------------------------------|----|----|-----------------------|
| 125 | ONE8   | AACATTCTGGGATGACAGGGGTA<br>CTGTTCTGCTCCAGTGAAGTGGGA | 60 | NA | Scribner et al., 1996 |
| 126 | SFO226 | GAGGGCTAGAGACTAGCTTCAG<br>GCAGTGGAAACAATACCCAG      | 60 | NA | Perry et al., 2005    |

McGowan, CR, Davidson, EA, Woram, RA, Danzmann, RG, Ferguson, MM and Davidson, WS, 2004. Ten polymorphic microsatellite markers from Arctic charr (*Salvelinus alpinus*): linkage analysis and amplification in other salmonids *Anim. Genet.* 35:479-481.

Olsen, JB, Bentzen, P, and Seeb, JE, 1998. Characterization of seven microsatellite loci derived from pink salmon. *Mol. Ecol.* 7: 1087-1089

O'Reilly P, Hamilton L, McConnell S, Wright J (1996). Rapid analysis of genetic variation in Atlantic salmon (*Salmo salar*) by PCR multiplexing of dinucleotide and tetranucleotide microsatellites. *Canadian Journal of Fisheries and Aquatic Sciences* 53: 2292-2298.

Phillips, RB, Keatley, KA, Morasch, MR, Ventura, AB, Lubieniecki, KP, Koop, BF, Danzmann, RG and Davidson, WS, 2009. Assignment of Atlantic salmon (*Salmo salar*) linkage groups to specific chromosomes: Conservation of large syntenic blocks corresponding to whole chromosome arms in rainbow trout (*Oncorhynchus mykiss*) *BMC Genetics* 10:46

Palti, Y, Fincham, MR and Rexroad, CE, III, 2002. Characterization of 38 polymorphic microsatellite markers for rainbow trout (*Oncorhynchus mykiss*). *Mol. Ecol. Notes.* 2: 449-452

Perry GML, King TL, St-Cyr J, Valcourt M, Bernatchez L 2005. Isolation and cross-familial amplification of 41 microsatellites for the brook charr (*Salvelinus fontinalis*). *Molecular Ecology Notes* 5(2): 346-351.

Rexroad, CE, III, Lee, Y, Keele, JW, Karamycheva, S, Brown, G, Koop, B, Gahr, SA, Palti, Y, and Quackenbush, J. 2003. Sequence analysis of a rainbow trout cDNA library and creation of a gene index. *Cytogenet. Genome Res.* 102: 347-354

Rise, ML, von Schalburg, KR, Brown, GD, Mawer, MA, Devlin, RH, Kuipers, N, Busby, M, Beetz-Sargent, M, Alberto, R, Gibbs, AR, Hunt, P, Shukin, R, Zeznik, JA, Nelson, C, Jones, SR, Smailus, DE, Jones, SJ, Schein, JE, Marra, MA, Butterfield, YS, Stott, JM, Ng, SH, Davidson, WS and Koop, BF, 2004. Development and application of a salmonoid EST database and cDNA microarray: data mining and interspecific hybridization characteristics. *Genome Res* 14:478-490

Sakamoto, T, Danzmann, RG, Gharbi, K, Howard, P, Ozaki, A, Sokkean, K, Woram, RA, Okamoto, N, Ferguson, MM, Holm, L-E, Guyomard, R and Hoyheim, B, 2000. A microsatellite linkage map of rainbow trout (*Oncorhynchus mykiss*) characterized by large sex-specific differences in recombination rates. *Genetics* 155:1331-1345.

Scribner KT, Gust JR, Fields RL (1996). Isolation and characterization of novel salmon microsatellite loci: cross-species amplification and population genetic applications. *Can J Fish Aquat Sci* 53: 833-841.

Timusk, E. R., M. Ferguson, H. K. Mogahadam, J. D. Norman, C. Wilson *et al.*, 2011. Genome evolution in the fish family salmonidae: generation of a brook charr genetic map and comparisons among charrs (Arctic charr and brook charr) with rainbow trout. *BMC genetics* 68:12.

Thorsen, J, Zhu, B, Frengen, E, Osoegawa, K, de Jong, PJ, Koop, BF, Davidson, WS and Hoyheim, B, 2005. A highly redundant BAC library of Atlantic salmon (*Salmo salar*): an important tool for salmon projects. *BMC Genomics* 6:50
