# Supplementary material for: Coding Gene Single Nucleotide Polymorphism Mapping and Quantitative Trait Loci Detection for Physiological Reproductive Traits in Brook Charr,Salvelinus fontinalis
Source: Oxford University Press journal article supplement (doi:10.1534/g3.111.001867), 2012-03-01
Supplement: 379_tables2.pdf [file 379_tables2.pdf]

**Table S2 Description of the Sequenom panel used to genotype the SNP markers in the F2 progeny**

| Technology | Panel  | Marker Name   | Oligo_Forward      | Forward_oligo_Sequence          | Oligo_Reverse      | Reverse_Oligo_Sequence          | Oligo_Probe           | Probe_Sequence                 |
|------------|--------|---------------|--------------------|---------------------------------|--------------------|---------------------------------|-----------------------|--------------------------------|
| sequenom   | SEQ010 | sf000032_01CT | sf000032_01CT_GA_F | ACGTTGGATGGGCGTCCCTGTTGAATTATC  | sf000032_01CT_GA_R | ACGTTGGATGGGCACACCCTTCTTTATCAC  | sf000032_01CT_GA_Pa   | CTTTATCACACACACTATTACTG        |
| sequenom   | SEQ010 | sf000124_02CT | sf000124_02CT_AG_F | ACGTTGGATGGCCAGTTGCCTATAGATTC   | sf000124_02CT_AG_R | ACGTTGGATGGTCTCCCTTATCCCTTTGC   | sf000124_02CT_AG02_P  | CCTTATCCCTTTGCACCAGTTTGTAG     |
| sequenom   | SEQ010 | sf000178_01CT | sf000178_01CT_GA_F | ACGTTGGATGCTTGCCACTTTTCTGGTAG   | sf000178_01CT_GA_R | ACGTTGGATGCTTGCTGGGACAAACTGAG   | sf000178_01CT_GA_Pa   | GGGACAAACTGAGATACGA            |
| sequenom   | SEQ010 | sf000191_01AG | sf000191_01AG_GC_F | ACGTTGGATGGACCTCTGTTTTACCGTGAG  | sf000191_01AG_GC_R | ACGTTGGATGGGCACTTCTTTGTATTGTGG  | sf000191_01AG_GC02_Pa | CCACTTGATAGGCAGCCA             |
| sequenom   | SEQ010 | sf000228_01AC | sf000228_01AC_TA_F | ACGTTGGATGTACAACAATTGTTCCACCC   | sf000228_01AC_TA_R | ACGTTGGATGGTCCACAATCAACCACTG    | sf000228_01AC_TA_Pa   | TGCTCCAATCACAGGT               |
| sequenom   | SEQ010 | sf000327_02AC | sf000327_02AC_GA_F | ACGTTGGATGATGAGTGACAGACGAGCTAC  | sf000327_02AC_GA_R | ACGTTGGATGTGCCTTGGTAGTCTATTCTC  | sf000327_02AC_GA_Pa   | AAGACAAAGACTAACAAGTTAATTAC     |
| sequenom   | SEQ010 | sf000657_01CT | sf000657_01CT_TC_F | ACGTTGGATGTTTCACACACTGTTTCGAGGG | sf000657_01CT_TC_R | ACGTTGGATGCGGTTTTGAACCGATGAAGC  | sf000657_01CT_TC_Pa   | AAAAAATGTTTCGAGGGTTTCTATG      |
| sequenom   | SEQ010 | sf000679_01CT | sf000679_01CT_TC_F | ACGTTGGATGGGATATTTTAGTGACATCGG  | sf000679_01CT_TC_R | ACGTTGGATGCCAGTGTGACAAAGGTTATG  | sf000679_01CT_TC_Pa   | CATTGTAATATGTGTATGTAGGCCTAGTA  |
| sequenom   | SEQ010 | sf000810_03CT | sf000810_03CT_CT_F | ACGTTGGATGCCTAAACACAGAAACAAGGG  | sf000810_03CT_CT_R | ACGTTGGATGTGAAGTATGCAAGGAGGGAG  | sf000810_03CT_CT02_P  | GGCAAGGAGGGAGTTTATCACAGA       |
| sequenom   | SEQ010 | sf000878_01AG | sf000878_01AG_CT_F | ACGTTGGATGACGTTAGTTGGGTGCAAGGG  | sf000878_01AG_CT_R | ACGTTGGATGAACAACTAGGCTAGCTCCC   | sf000878_01AG_CT02_P  | CCCCTAGTTAACTCTGGAAAATAGGA     |
| sequenom   | SEQ010 | sf000891_02AC | sf000891_02AC_CA_F | ACGTTGGATGCAGAAATCCTACACTCGTCC  | sf000891_02AC_CA_R | ACGTTGGATGTCTTCTTTAAAGAGGCAGG   | sf000891_02AC_CA02_Pa | GGAGAGACGGAAGATTC              |
| sequenom   | SEQ010 | sf000961_01AC | sf000961_01AC_CT_F | ACGTTGGATGCCCTCAAGGATAGAAGAAC   | sf000961_01AC_CT_R | ACGTTGGATGACTGTAATACAGAAACCAGC  | sf000961_01AC_CT_P    | ACCCAGCTATTCTCTGAATGTACAATT    |
| sequenom   | SEQ010 | sf000970_01AC | sf000970_01AC_GA_F | ACGTTGGATGAGGAAGCGATGAGTTAGGAC  | sf000970_01AC_GA_R | ACGTTGGATGAAATGGCAACTCGTTGAGG   | sf000970_01AC_GA_Pa   | TAAACTCGTTGAGGGAGGGAGATA       |
| sequenom   | SEQ010 | sf001181_01CT | sf001181_01CT_GA_F | ACGTTGGATGTGTGCAGTGATCCACAGTTC  | sf001181_01CT_GA_R | ACGTTGGATGCAAACACACACAAACCCC    | sf001181_01CT_GA_Pa   | GTTCTGTTGGAGCATTG              |
| sequenom   | SEQ010 | sf001661_01AC | sf001661_01AC_GT_F | ACGTTGGATGTGAGAAATCCAGGGCTTGAAC | sf001661_01AC_GT_R | ACGTTGGATGGGGTACTTCAGAGCCAAATG  | sf001661_01AC_GT02_P  | TGTGTTGGTTTCAGAGAAT            |
| sequenom   | SEQ010 | sf001740_01GT | sf001740_01GT_GA_F | ACGTTGGATGCCAAAGCCCAACAAAAAAGG  | sf001740_01GT_GA_R | ACGTTGGATGGAGTTTCTGAAAGTTTAC    | sf001740_01GT_GA_Pa   | TGAAAGTTCACATTAGACTCTAG        |
| sequenom   | SEQ010 | sf002175_02GT | sf002175_02GT_TC_F | ACGTTGGATGTGCCTGACATCTGAACTCTG  | sf002175_02GT_TC_R | ACGTTGGATGTTTTACAGTGGCGGAACGG   | sf002175_02GT_TC02_Pa | AGCGGAACGGGCCAATG              |
| sequenom   | SEQ010 | sf003063_01AC | sf003063_01AC_CA_F | ACGTTGGATGACCCTCAGCCTATCATATCC  | sf003063_01AC_CA_R | ACGTTGGATGGCAGTACCTACATTGTGTCC  | sf003063_01AC_CA_P    | GGTAGCAAATGTTGCTACAGCAACAATGAG |
| sequenom   | SEQ010 | sf003084_01AG | sf003084_01AG_AG_F | ACGTTGGATGCCATGGCTCTCTATAGAC    | sf003084_01AG_AG_R | ACGTTGGATGGCAATATGGGGTAACACAAG  | sf003084_01AG_AG_P    | CAGCATTATTACTGGTACAATTAATGCATA |
| sequenom   | SEQ010 | sf003407_01AG | sf003407_01AG_TC_F | ACGTTGGATGTGCAGGCCATTCCAAAAAGC  | sf003407_01AG_TC_R | ACGTTGGATGCTGCCATTCTGAAGAAACG   | sf003407_01AG_TC02_Pa | CCTGAGCATGTTATTACCTGACAAGAA    |
| sequenom   | SEQ010 | sf003601_01GT | sf003601_01GT_CT_F | ACGTTGGATGGTAAAGTAGCTGGTGCCTTG  | sf003601_01GT_CT_R | ACGTTGGATGAGCCCCGGATTTATGTATGC  | sf003601_01GT_CT_P    | ACAGTAGCAACAAACCCCT            |
| sequenom   | SEQ010 | sf003621_01AC | sf003621_01AC_TC_F | ACGTTGGATGGAGCCATAGGTAATGTCCAG  | sf003621_01AC_TC_R | ACGTTGGATGCATTCTACCGGAGTGTAAC   | sf003621_01AC_TC02_Pa | CCAACTCTGTTTGAGATGTC           |
| sequenom   | SEQ010 | sf003698_01AT | sf003698_01AT_GT_F | ACGTTGGATGTTGTTGAAGGAAAGGCTG    | sf003698_01AT_GT_R | ACGTTGGATGAACACAGTGCCTTCTCACTC  | sf003698_01AT_GT_Pa   | TCTCACTCACCTAAAACAAAT          |
| sequenom   | SEQ010 | sf003713_01AG | sf003713_01AG_TA_F | ACGTTGGATGCGATTGAGACACATCTATGG  | sf003713_01AG_TA_R | ACGTTGGATGTAGATAGCAGATCTCGGAAG  | sf003713_01AG_TA_Pa   | CTACTCCACATGTGATGTTAAT         |
| sequenom   | SEQ010 | sf003724_01CG | sf003724_01CG_TC_F | ACGTTGGATGCTGGCTTTGCTTGTAAACCC  | sf003724_01CG_TC_R | ACGTTGGATGGGAAAAATCTGCATGGTTTAC | sf003724_01CG_TC_Pa   | CCCCCATCTGCATGGTTTACCCATTG     |

|          |        |               |                    |                                 |                    |                                 |                       |                              |
|----------|--------|---------------|--------------------|---------------------------------|--------------------|---------------------------------|-----------------------|------------------------------|
| sequenom | SEQ010 | sf003897_01CT | sf003897_01CT_GA_F | ACGTTGGATGGGGAATCATAGGCAATGAGG  | sf003897_01CT_GA_R | ACGTTGGATGGGCGTAGTCGGTACTTTATG  | sf003897_01CT_GA02_Pa | CCATACCTCCAGCTTGACT          |
| sequenom | SEQ010 | sf003919_01CT | sf003919_01CT_CT_F | ACGTTGGATGCAGTCCCTTGGTATAATGGC  | sf003919_01CT_CT_R | ACGTTGGATGGAATCCTGACCAGAGTAGTG  | sf003919_01CT_CT_P    | ACTGACCAGAGTAGTGACCCAATT     |
| sequenom | SEQ010 | sf004030_01AG | sf004030_01AG_AT_F | ACGTTGGATGGAGGAAAGACAGTGGGAAAG  | sf004030_01AG_AT_R | ACGTTGGATGGGCTGGTCTAGCCTATTTAG  | sf004030_01AG_AT_P    | TGGATTCAAACATGTGAGC          |
| sequenom | SEQ010 | sf004070_25AC | sf004070_25AC_GA_F | ACGTTGGATGCACAAATTTCTGGGTCTGGG  | sf004070_25AC_GA_R | ACGTTGGATGAGCTGTTAGCAGAAAGCTGG  | sf004070_25AC_GA_Pa   | ATCAATCAATCACACTCACTT        |
| sequenom | SEQ011 | sf000071_02CT | sf000071_02CT_CA_F | ACGTTGGATGCAGATTAGGCCTAGACAACG  | sf000071_02CT_CA_R | ACGTTGGATGCACAGGTTACTAAGAGTGTGC | sf000071_02CT_CA_Pa   | GGACTAAGAGTGTGCTGAAATT       |
| sequenom | SEQ011 | sf000078_02AG | sf000078_02AG_AT_F | ACGTTGGATGAGGGAAAGGGTTTTAAGCGG  | sf000078_02AG_AT_R | ACGTTGGATGGCCACATTAACATACACCTG  | sf000078_02AG_AT_P    | GACCTACAGAAGAAAATAAAATAAGC   |
| sequenom | SEQ011 | sf000137_01AG | sf000137_01AG_TA_F | ACGTTGGATGTTTCGAAACGCAATCACCGAG | sf000137_01AG_TA_R | ACGTTGGATGACTGAATTGACGGGATCAGC  | sf000137_01AG_TA_Pa   | AGACATGGAGTCCTATACTAT        |
| sequenom | SEQ011 | sf000324_05AC | sf000324_05AC_CA_F | ACGTTGGATGTCTGGAAACTGCGTTCTACC  | sf000324_05AC_CA_R | ACGTTGGATGAGACAGCGGATTTGAGACAG  | sf000324_05AC_CA_P    | GTCTCCACACTTTACTTCT          |
| sequenom | SEQ011 | sf000390_01AC | sf000390_01AC_TC_F | ACGTTGGATGCACAGGTATACTGTTGGTCTG | sf000390_01AC_TC_R | ACGTTGGATGACCATGGTACTCATGACTGG  | sf000390_01AC_TC_Pa   | TGGAGGGCTTTGACAT             |
| sequenom | SEQ011 | sf000397_07CG | sf000397_07CG	CG_F | ACGTTGGATGTTGCCTGTTTGAGTGTTTGG  | sf000397_07CG	CG_R | ACGTTGGATGCAAAGACTAAACAACAGCCC  | sf000397_07CG	CG_P    | GTTGAGCACCAACCACAA           |
| sequenom | SEQ011 | sf000428_01AT | sf000428_01AT_AT_F | ACGTTGGATGACCGTATGTATGCAGCCAG   | sf000428_01AT_AT_R | ACGTTGGATGCTGGACAATCTAAGCACTGG  | sf000428_01AT_AT02_P  | ACATTAAGCATGGTAGGCTATATAA    |
| sequenom | SEQ011 | sf000584_01GT | sf000584_01GT_GA_F | ACGTTGGATGGGGACTCCACACATTACAAA  | sf000584_01GT_GA_R | ACGTTGGATGAACTAACAGTTAGCATGGTG  | sf000584_01GT_GA_Pa   | GAGAAAAGCTGAACAAAGTAATTTTCTA |
| sequenom | SEQ011 | sf000854_01CT | sf000854_01CT_GT_F | ACGTTGGATGCGGTGTCTGCGATGATTTAG  | sf000854_01CT_GT_R | ACGTTGGATGTCTCCCTCCTCAATCTTC    | sf000854_01CT_GT02_P  | CACGTCGGCTCAGCATCA           |
| sequenom | SEQ011 | sf001086_01CT | sf001086_01CT_TC_F | ACGTTGGATGTACTGTCCAGCAACACTC    | sf001086_01CT_TC_R | ACGTTGGATGATTTACACCCAGGTCTAAC   | sf001086_01CT_TC_Pa   | TAACCCAGGTCTAACATACT         |
| sequenom | SEQ011 | sf001184_01CT | sf001184_01CT_TC_F | ACGTTGGATGTCTCTCAACAGCAAGAAGGG  | sf001184_01CT_TC_R | ACGTTGGATGCACTGCTCAGACGCTCTTTG  | sf001184_01CT_TC02_Pa | CCAACACATTACTTGCTCATCAATATT  |
| sequenom | SEQ011 | sf001284_01AG | sf001284_01AG_GT_F | ACGTTGGATGGCTATTTCCCAAGTTTCTCTC | sf001284_01AG_GT_R | ACGTTGGATGCGGCCGTTCTTTAAATTACC  | sf001284_01AG_GT_Pa   | CTTTTCTCAAAGCCACA            |
| sequenom | SEQ011 | sf001770_01AG | sf001770_01AG_AG_F | ACGTTGGATGAGGCACTGGTGTCTTTGTTT  | sf001770_01AG_AG_R | ACGTTGGATGTACGCTTAACAAAGGTCGG   | sf001770_01AG_AG_P    | TAAGGTCGGCCCTAT              |
| sequenom | SEQ011 | sf002024_02AC | sf002024_02AC_AG_F | ACGTTGGATGGCTATCTCTGGATAGAGAGG  | sf002024_02AC_AG_R | ACGTTGGATGCCTGTGTGTTGTACATGCG   | sf002024_02AC_AG_P    | TTGGCTCCAGTTATACTACCAC       |
| sequenom | SEQ011 | sf002033_01AG | sf002033_01AG_TA_F | ACGTTGGATGAGTTGAGGTTGGAGGAGTAG  | sf002033_01AG_TA_R | ACGTTGGATGGAACTACACTACTGTAC     | sf002033_01AG_TA_Pa   | GGAGTAGTGATTGTCAATTGG        |
| sequenom | SEQ011 | sf002155_01CT | sf002155_01CT_AG_F | ACGTTGGATGGTACCACCTTGATTGTCACG  | sf002155_01CT_AG_R | ACGTTGGATGATGAAGCCTGATATTCCAAC  | sf002155_01CT_AG02_P  | CTCTTTTTAATCAAACATTCCATTGCA  |
| sequenom | SEQ011 | sf002948_01CG | sf002948_01CG_GT_F | ACGTTGGATGAAGGTCAGAGCAGTGTTC    | sf002948_01CG_GT_R | ACGTTGGATGATCTGAGCGGTAGATCTAGG  | sf002948_01CG_GT02_P  | CGACTCAGAAACGTTGGT           |
| sequenom | SEQ011 | sf003141_03AC | sf003141_03AC_TA_F | ACGTTGGATGTGTTGGATGCCTTTGTTCCG  | sf003141_03AC_TA_R | ACGTTGGATGCTGACAGACTCCACTTTTCC  | sf003141_03AC_TA02_Pa | AGTCCACTTTTCCAGCGCAT         |
| sequenom | SEQ011 | sf003197_01AG | sf003197_01AG_GA_F | ACGTTGGATGCAGAGCACCTATGATGTGAC  | sf003197_01AG_GA_R | ACGTTGGATGAGCCTCCTTTACGAGTTACC  | sf003197_01AG_GA02_Pa | GGGGTACCTCCCCATTGTCCTGATTTC  |
| sequenom | SEQ011 | sf003589_01AC | sf003589_01AC_CT_F | ACGTTGGATGGCAGGGACACGAGTTATTTG  | sf003589_01AC_CT_R | ACGTTGGATGTTCACTACCACGATATGC    | sf003589_01AC_CT_P    | CCTAGTCACTTTAACCCCTA         |
| sequenom | SEQ011 | sf003610_01AT | sf003610_01AT_AT_F | ACGTTGGATGTAGCTGGGCGTGCTTAACTG  | sf003610_01AT_AT_R | ACGTTGGATGGACTCTGAGAACGTATACCG  | sf003610_01AT_AT_P    | GGGTATACCGTAAACCCATTCCCCC    |
| sequenom | SEQ011 | sf003700_02GT | sf003700_02GT_TC_F | ACGTTGGATGGCGGTGACTATACTGTTGTG  | sf003700_02GT_TC_R | ACGTTGGATGTACAATCGACCGAGAGCATC  | sf003700_02GT_TC_Pa   | AGACCGAGAGCATCTCATTATAC      |
| sequenom | SEQ011 | sf003728_02AT | sf003728_02AT_TC_F | ACGTTGGATGAACCAGCCTATCAAGTGGTC  | sf003728_02AT_TC_R | ACGTTGGATGACAACAGGAACAGCATCCAG  | sf003728_02AT_TC02_Pa | ACAGCATCCAGACTGAACATAG       |
| sequenom | SEQ011 | sf003836_01CT | sf003836_01CT_TA_F | ACGTTGGATGGAGGTTTCTACTGTCACCTG  | sf003836_01CT_TA_R | ACGTTGGATGCGACTGCAACTGAAAGCAAC  | sf003836_01CT_TA_Pa   | AAACTGAAAGCAACATGGGCATGC     |

|          |        |               |                    |                                 |                    |                                |                       |                                |
|----------|--------|---------------|--------------------|---------------------------------|--------------------|--------------------------------|-----------------------|--------------------------------|
| sequenom | SEQ011 | sf004064_01AT | sf004064_01AT_CA_F | ACGTTGGATGGAACACAGTGGTCTCCATAG  | sf004064_01AT_CA_R | ACGTTGGATGCACATGCCACCCAATATGAG | sf004064_01AT_CA02_Pa | AGTATAATAAACTAGGACTAATAGACTA   |
| sequenom | SEQ011 | sf004112_01AC | sf004112_01AC_AG_F | ACGTTGGATGATATGGCCTGTTGAAGTGGG  | sf004112_01AC_AG_R | ACGTTGGATGCAGACAGGATTAGGAACGAC | sf004112_01AC_AG_P    | ACTCATCTAAACGCTCC              |
| sequenom | SEQ011 | sf004602_04AG | sf004602_04AG_GA_F | ACGTTGGATGAAAGAGACAGTTCTGCCTCC  | sf004602_04AG_GA_R | ACGTTGGATGTAGGAATGCTTACTGTGAC  | sf004602_04AG_GA02_Pa | TGGCCTCCATTACCTCAAAG           |
| sequenom | SEQ011 | sf006081_01AT | sf006081_01AT_GT_F | ACGTTGGATGCGTGGCGGATAGAATTAATCT | sf006081_01AT_GT_R | ACGTTGGATGGTCAGGGCATAGCACTTTTC | sf006081_01AT_GT_P    | TTCCCGCCTTACATCAAAGTTACCTGAA   |
| sequenom | SEQ012 | sf000023_02AC | sf000023_02AC_TC_F | ACGTTGGATGCAAACGTGATATCTGTCCCC  | sf000023_02AC_TC_R | ACGTTGGATGAGTCCCCAGTCAAAGTGAAG | sf000023_02AC_TC_Pa   | TTCCAATAATGGTCAGAATCA          |
| sequenom | SEQ012 | sf000179_01AC | sf000179_01AC_TC_F | ACGTTGGATGACAGCGGAGGAGATTTGTTT  | sf000179_01AC_TC_R | ACGTTGGATGACCTGCATTGACACAGATGG | sf000179_01AC_TC_Pa   | GGGAGCTATAGTGACAGCAGTTAG       |
| sequenom | SEQ012 | sf000209_01AG | sf000209_01AG_CT_F | ACGTTGGATGTCTGTTCATTAGCCAGAGCC  | sf000209_01AG_CT_R | ACGTTGGATGCGGTCCGATCAGTTTTTCTC | sf000209_01AG_CT_P    | AGCCATTGTGACTTAAATGTCTC        |
| sequenom | SEQ012 | sf000230_01CG | sf000230_01CG_TA_F | ACGTTGGATGTGAAAGTAGCCTGGGTTGTG  | sf000230_01CG_TA_R | ACGTTGGATGCATGAGCGTCACCAACCAAT | sf000230_01CG_TA02_Pa | TGCGTCACCAACCAATGAAAAG         |
| sequenom | SEQ012 | sf000633_01AT | sf000633_01AT_GT_F | ACGTTGGATGGAGATTTCCACTCCTTACC   | sf000633_01AT_GT_R | ACGTTGGATGGCCGTTGATAGAACGGTAAC | sf000633_01AT_GT02_Pa | CAGGTCGTGGTTTTTAAATTGTCTGG     |
| sequenom | SEQ012 | sf000706_01CT | sf000706_01CT_AG_F | ACGTTGGATGGGTCAATGAATGCATCCTCG  | sf000706_01CT_AG_R | ACGTTGGATGTTGCTATGGGCTGGACAATG | sf000706_01CT_AG_P    | GCTGGACAATGGCAGAGGTGTCCAATTGCA |
| sequenom | SEQ012 | sf000719_01CT | sf000719_01CT_AT_F | ACGTTGGATGTCAGCCTCAGCTAAAACCC   | sf000719_01CT_AT_R | ACGTTGGATGAATGGGAATGCACTCGAGG  | sf000719_01CT_AT_P    | ATGAATGTGAATGCACTCGAGGGGAGAG   |
| sequenom | SEQ012 | sf000905_02CT | sf000905_02CT_AT_F | ACGTTGGATGCTGTTATGGGCGTCTCTTC   | sf000905_02CT_AT_R | ACGTTGGATGCTGCAATTGGTCAAGTTGGG | sf000905_02CT_AT_P    | AAACAATACACTTTCAGATTTGTACA     |
| sequenom | SEQ012 | sf000966_03CT | sf000966_03CT_AG_F | ACGTTGGATGTCTCCCTGATGTGAGGAAAG  | sf000966_03CT_AG_R | ACGTTGGATGCTGCAGCAGAACACACATAC | sf000966_03CT_AG_P    | CCCCTCTGGTTGGCTCAGTCTT         |
| sequenom | SEQ012 | sf001069_01AG | sf001069_01AG_GT_F | ACGTTGGATGCCTGGTTTTCTCCTCAGATG  | sf001069_01AG_GT_R | ACGTTGGATGGGGACAACTGCATGTTTT   | sf001069_01AG_GT02_P  | GTTCTTCTCATGGGCTTT             |
| sequenom | SEQ012 | sf001437_01AT | sf001437_01AT_AG_F | ACGTTGGATGTGTGACACAGGGTGAGGTTT  | sf001437_01AT_AG_R | ACGTTGGATGTTTCTTGTTCAGGCGAG    | sf001437_01AT_AG_P    | GGGAAGGGTGAGGTTTGTACAACC       |
| sequenom | SEQ012 | sf001601_01AC | sf001601_01AC_CT_F | ACGTTGGATGTCCAAGACCATGGATGAGAG  | sf001601_01AC_CT_R | ACGTTGGATGATTGCAGGGATGTGCAGTAG | sf001601_01AC_CT_P    | ATGTCTGACCAACTACTGTCTAT        |
| sequenom | SEQ012 | sf001644_01AG | sf001644_01AG_GT_F | ACGTTGGATGCAAACAGACATGTCATCACG  | sf001644_01AG_GT_R | ACGTTGGATGTTACATGCACCAGATGCTCC | sf001644_01AG_GT_Pa   | TTTTGGGGACCGAGCAAAGAATTTT      |
| sequenom | SEQ012 | sf001686_01CT | sf001686_01CT_GA_F | ACGTTGGATGGAGTTGAGCCGTTCTGTATC  | sf001686_01CT_GA_R | ACGTTGGATGTCTGTGACAGTCCAGGTG   | sf001686_01CT_GA_Pa   | GGCAACGTGGTGACAG               |
| sequenom | SEQ012 | sf001996_02CG | sf001996_02CG_AG_F | ACGTTGGATGACCATGGGCCAAAAAGCTTG  | sf001996_02CG_AG_R | ACGTTGGATGTTTCTTCCACAGTGCCCTC  | sf001996_02CG_AG_P    | TGCCTCACAAGTGCTA               |
| sequenom | SEQ012 | sf002203_01CT | sf002203_01CT_AG_F | ACGTTGGATGGGTTCAATCCCTTTGCATCC  | sf002203_01CT_AG_R | ACGTTGGATGGGTGGCAGAACCAGTTTT   | sf002203_01CT_AG_P    | CCTTTCAATGCTTTTCAGC            |
| sequenom | SEQ012 | sf002250_01AG | sf002250_01AG_CA_F | ACGTTGGATGAAAGATGGCTGATCTCCCTC  | sf002250_01AG_CA_R | ACGTTGGATGTTGTGCACTTTTCGTCCTTG | sf002250_01AG_CA_P    | CCCCACTACAAATGGGCCAAAAACAAT    |
| sequenom | SEQ012 | sf002353_02AT | sf002353_02AT_CT_F | ACGTTGGATGATTTCAACCAGCCATGGGAG  | sf002353_02AT_CT_R | ACGTTGGATGAGTTGTTGCCACTCACCTG  | sf002353_02AT_CT_P    | GGTGGTTGATGCCCTT               |
| sequenom | SEQ012 | sf002792_01AG | sf002792_01AG_AG_F | ACGTTGGATGGTTCATTGTGGTGAACGGAC  | sf002792_01AG_AG_R | ACGTTGGATGAAGAGTTTCAGTAGCCCTGC | sf002792_01AG_AG02_P  | GGCAAGCCTCTGTAGAACAATGG        |
| sequenom | SEQ012 | sf003076_01CT | sf003076_01CT_AG_F | ACGTTGGATGCAGTGGTTTAGATGGTACGC  | sf003076_01CT_AG_R | ACGTTGGATGACACCGCTATTTCTGGTTG  | sf003076_01CT_AG_P    | CCCTTTGGTACATAAACTGAAATTAGGC   |
| sequenom | SEQ012 | sf003092_01CT | sf003092_01CT_TC_F | ACGTTGGATGTTCCAAGCCCTAGATTTGCC  | sf003092_01CT_TC_R | ACGTTGGATGATATCAACTGACTGGAGGGC | sf003092_01CT_TC_Pa   | ATTCATAATTCTATATCATTACAGC      |
| sequenom | SEQ012 | sf003118_01GT | sf003118_01GT_GA_F | ACGTTGGATGCTATGAGGAGTGGTGTGTTT  | sf003118_01GT_GA_R | ACGTTGGATGCCATACAAAACCTCTGTAG  | sf003118_01GT_GA_Pa   | GGAAAAACCTCTGTAGTGTATGGCGG     |
| sequenom | SEQ012 | sf003334_01CT | sf003334_01CT_AG_F | ACGTTGGATGTTATAGCTTCAAATAGGCC   | sf003334_01CT_AG_R | ACGTTGGATGGGCCTATGTAACCTAGCCAG | sf003334_01CT_AG_P    | CCATTTATTTGTGTTCTGGAAAAATGTAAC |
| sequenom | SEQ012 | sf003500_02CT | sf003500_02CT_CT_F | ACGTTGGATGAGAGGCGCGATGAATTTAAG  | sf003500_02CT_CT_R | ACGTTGGATGTGACAGCTGACAATGTGCTC | sf003500_02CT_CT02_P  | CGTGCTCTGGCTCGAGC              |

|          |        |               |                    |                                |                    |                                  |                       |                               |
|----------|--------|---------------|--------------------|--------------------------------|--------------------|----------------------------------|-----------------------|-------------------------------|
| sequenom | SEQ012 | sf003595_01CT | sf003595_01CT_AT_F | ACGTTGGATGTGTACACTTTTCCAATGC   | sf003595_01CT_AT_R | ACGTTGGATGGCCTAGTCACAGCATTTACG   | sf003595_01CT_AT_P    | CACAATAAAGTGTGTACAG           |
| sequenom | SEQ012 | sf003614_01CT | sf003614_01CT_GT_F | ACGTTGGATGGACCTGAAGTTCAGCAGTAG | sf003614_01CT_GT_R | ACGTTGGATGTCTGACTGACGGAAGTCTGATG | sf003614_01CT_GT_Pa   | CATCTTTAAACCTTACAGGT          |
| sequenom | SEQ012 | sf003813_11CT | sf003813_11CT_AG_F | ACGTTGGATGAAGACATGGTTACTGACGGC | sf003813_11CT_AG_R | ACGTTGGATGTTCTCTCTCTCCAGCCAAC    | sf003813_11CT_AG02_P  | CCTGACCCCAACGAGGAGCT          |
| sequenom | SEQ012 | sf004055_02CT | sf004055_02CT_AT_F | ACGTTGGATGTAGCGCAGGATTTTACGACC | sf004055_02CT_AT_R | ACGTTGGATGCCAGTGTGAGTGTCTAATG    | sf004055_02CT_AT_P    | CAGGGAGACTTGTAATTCAGC         |
| sequenom | SEQ012 | sf006073_01CT | sf006073_01CT_GA_F | ACGTTGGATGAGCCTGGAGTGTTTTTCTG  | sf006073_01CT_GA_R | ACGTTGGATGAGTGGCCGTCGTCAAGTTG    | sf006073_01CT_GA_Pa   | TCTGTTTGCTGCTAGTG             |
| sequenom | SEQ013 | sf000002_01AG | sf000002_01AG_AG_F | ACGTTGGATGGCACAAGAGAGCTATATTAC | sf000002_01AG_AG_R | ACGTTGGATGGAGAGCCCTTACAGTTTAC    | sf000002_01AG_AG_P    | CCTCCCTTTGCTACGTGGATA         |
| sequenom | SEQ013 | sf000017_01CT | sf000017_01CT_GC_F | ACGTTGGATGCACAATGCAGATCCCAGATG | sf000017_01CT_GC_R | ACGTTGGATGGGCTCCAGCTTTAATTGTG    | sf000017_01CT_GC02_Pa | ATAAGTACTCTCTGAATGGGAT        |
| sequenom | SEQ013 | sf000021_01AG | sf000021_01AG_CA_F | ACGTTGGATGTAATGACCTCTAGCCACCTC | sf000021_01AG_CA_R | ACGTTGGATGATAAACAGCTGTGTGGGACG   | sf000021_01AG_CA_Pa   | GGGATGGGTCTGCTGGAT            |
| sequenom | SEQ013 | sf000086_01CT | sf000086_01CT_CT_F | ACGTTGGATGTATCCATAGGGCAAGCGTAG | sf000086_01CT_CT_R | ACGTTGGATGGCGAAGTCGTGACACAAAAG   | sf000086_01CT_CT_P    | AAACGTGCTTATAGACAAC           |
| sequenom | SEQ013 | sf000088_01AC | sf000088_01AC_GA_F | ACGTTGGATGGGTTTGCAGAACACAAAAGC | sf000088_01AC_GA_R | ACGTTGGATGTCCACTGGTCTGGTGTATTC   | sf000088_01AC_GA_Pa   | CAACTATATTGATTTAATAAACTTGGGAC |
| sequenom | SEQ013 | sf000119_01AG | sf000119_01AG_AG_F | ACGTTGGATGCAGCAGCTATTGTTGCTATC | sf000119_01AG_AG_R | ACGTTGGATGACAAAACAGTGTCTAGGGAG   | sf000119_01AG_AG_P    | GAATTACTTACAGCAGACTGAATACAGT  |
| sequenom | SEQ013 | sf000139_01CG | sf000139_01CG_GT_F | ACGTTGGATGCCTAATGTTACGAAATACCC | sf000139_01CG_GT_R | ACGTTGGATGGCGGTCTTTTACTGCAAC     | sf000139_01CG_GT_Pa   | CAAGTATAAGCCTAATAGACACATTT    |
| sequenom | SEQ013 | sf000157_01AT | sf000157_01AT_CA_F | ACGTTGGATGAGATCAGCAGAGCAGACAAG | sf000157_01AT_CA_R | ACGTTGGATGCGATATTTCCCATGGCCTG    | sf000157_01AT_CA_P    | TGGAGTTGTGTAGTCTAA            |
| sequenom | SEQ013 | sf000175_01CT | sf000175_01CT_GT_F | ACGTTGGATGTTGTCCCAACAGAAACACAG | sf000175_01CT_GT_R | ACGTTGGATGAGACGATTGGCCAATTTCC    | sf000175_01CT_GT02_P  | CGGCCAATTTCCCAAAGCA           |
| sequenom | SEQ013 | sf000392_01AC | sf000392_01AC_CT_F | ACGTTGGATGAGCCGTTTTGAAGCTGGTCC | sf000392_01AC_CT_R | ACGTTGGATGGTATGACCTCATTTGAGC     | sf000392_01AC_CT_P    | TTGGAATGCAGTTGGT              |
| sequenom | SEQ013 | sf000583_02CT | sf000583_02CT_TC_F | ACGTTGGATGTTAGTGCTACCACTAGAGGG | sf000583_02CT_TC_R | ACGTTGGATGTTAGACTGGGCTTCTCTCC    | sf000583_02CT_TC_Pa   | TCCACAGTTAGCTGCAGGCGTGC       |
| sequenom | SEQ013 | sf000717_02AG | sf000717_02AG_TC_F | ACGTTGGATGGTTTCTGTTTCTCATCTCAC | sf000717_02AG_TC_R | ACGTTGGATGGTCTTGTAGGAAGTCAGATG   | sf000717_02AG_TC02_Pa | CTGTGGCTTTGAAATGTATCC         |
| sequenom | SEQ013 | sf000747_02CT | sf000747_02CT_CT_F | ACGTTGGATGATGTTGTATTCTGACACTGG | sf000747_02CT_CT_R | ACGTTGGATGAAAGTCACTCTTAAGGCCCC   | sf000747_02CT_CT_P    | AGTAAGGCCCATGTAGGTT           |
| sequenom | SEQ013 | sf000978_02CT | sf000978_02CT_GA_F | ACGTTGGATGGCGAACCGTCTTGCAATAAC | sf000978_02CT_GA_R | ACGTTGGATGGAAACGTCTCTAGTTGCCAG   | sf000978_02CT_GA_Pa   | TTGCTAGAACATTGCCA             |
| sequenom | SEQ013 | sf001164_02GT | sf001164_02GT_TC_F | ACGTTGGATGAACTAGCTGGAATGATCAC  | sf001164_02GT_TC_R | ACGTTGGATGAAACCTCTGACGTGAGTAGC   | sf001164_02GT_TC_Pa   | GGAGATCACTGGACAAGTTTAAGG      |
| sequenom | SEQ013 | sf001692_03CG | sf001692_03CG_CT_F | ACGTTGGATGTTCTGTGGCCTTCTGTTTC  | sf001692_03CG_CT_R | ACGTTGGATGGTAGGAAGAACAAGGACGC    | sf001692_03CG_CT_P    | CAAAGTACGCTAACAAGAGAAACGCTGAT |
| sequenom | SEQ013 | sf002333_01AC | sf002333_01AC_AG_F | ACGTTGGATGTGCCTTATCTGTATACGCTC | sf002333_01AC_AG_R | ACGTTGGATGTGCATCACACTACTGTACAC   | sf002333_01AC_AG_P    | GGGGAGGAACTGGAATTTGAAGTGC     |
| sequenom | SEQ013 | sf003018_09CT | sf003018_09CT_AG_F | ACGTTGGATGGTTCAGCACTGCCTCATTTT | sf003018_09CT_AG_R | ACGTTGGATGGGTATGACGTTCACTCTGAC   | sf003018_09CT_AG_P    | CCCTATCCACCAGGTGGCT           |
| sequenom | SEQ013 | sf003105_01CT | sf003105_01CT_TC_F | ACGTTGGATGCTAACTTTGCATCCGCACTG | sf003105_01CT_TC_R | ACGTTGGATGACAACTCCATGCACAAGGAC   | sf003105_01CT_TC_Pa   | GTCACGGAACATTTTACCAG          |
| sequenom | SEQ013 | sf003208_01CT | sf003208_01CT_TC_F | ACGTTGGATGTACAAAACCTTAGCTCCCC  | sf003208_01CT_TC_R | ACGTTGGATGTGTACAAAAGAGGATGCGG    | sf003208_01CT_TC_Pa   | CTCACAGGCGCCATCTTAATTT        |
| sequenom | SEQ013 | sf003442_01CG | sf003442_01CG_AG_F | ACGTTGGATGAGCACAGCCAACCACTTTAC | sf003442_01CG_AG_R | ACGTTGGATGAAGCTGTCTCCTGGGCTTAA   | sf003442_01CG_AG_P    | GGTTACATTATGCAGGGCATC         |
| sequenom | SEQ013 | sf003538_01AG | sf003538_01AG_GT_F | ACGTTGGATGCAATCAAGCACTTCAAATG  | sf003538_01AG_GT_R | ACGTTGGATGTGGTGCTACTTACATGGAG    | sf003538_01AG_GT_Pa   | CCTCCTAGAGGCTACATATGCAAGACAA  |
| sequenom | SEQ013 | sf003697_01CT | sf003697_01CT_CA_F | ACGTTGGATGCAAAAATGTGTGTCGTTGGG | sf003697_01CT_CA_R | ACGTTGGATGTGGGCAAAGAGGGCTATTC    | sf003697_01CT_CA_Pa   | CTGCAAAGAGGGCTATTCTAAAAT      |

|          |        |               |                    |                                 |                    |                                 |                      |                               |
|----------|--------|---------------|--------------------|---------------------------------|--------------------|---------------------------------|----------------------|-------------------------------|
| sequenom | SEQ013 | sf003715_01AT | sf003715_01AT_CT_F | ACGTTGGATGTAGATGTTCCAGGCCAAGACC | sf003715_01AT_CT_R | ACGTTGGATGCCTTACAAGTCTGGAAATGTG | sf003715_01AT_CT02_P | TGTGATAATGCATGGAATGC          |
| sequenom | SEQ013 | sf003726_01CT | sf003726_01CT_GT_F | ACGTTGGATGCCATCATTCAACACTCCTCC  | sf003726_01CT_GT_R | ACGTTGGATGTGCTCATCTAGCAACTCAGG  | sf003726_01CT_GT02_P | CCAAACTCAGGTGCTTTTCATTA       |
| sequenom | SEQ013 | sf004016_01AT | sf004016_01AT_AG_F | ACGTTGGATGCCAGTCTGTCTATAACCCATC | sf004016_01AT_AG_R | ACGTTGGATGGAACACAGAGACAATGGAGG  | sf004016_01AT_AG_P   | GGGGAATTTTGAGGTGTGTAATTACAACA |
| sequenom | SEQ013 | sf004099_01CG | sf004099_01CG_TA_F | ACGTTGGATGGGAAACACATATCTGGTGAG  | sf004099_01CG_TA_R | ACGTTGGATGGTGGAGAGTTCATCATTAGC  | sf004099_01CG_TA_Pa  | GGGCAGATCTGTTGCCAATTGG        |
| sequenom | SEQ013 | sf004299_15GT | sf004299_15GT_CT_F | ACGTTGGATGGGGACTCCACACATTACAAA  | sf004299_15GT_CT_R | ACGTTGGATGAACTAACAGTTAGCATGGTG  | sf004299_15GT_CT_P   | GAAAAGCTGAACAAAGTAATTTTCTA    |
| sequenom | SEQ013 | sf005138_03AG | sf005138_03AG_CA_F | ACGTTGGATGGGAAGGCATCCTCAAATTC   | sf005138_03AG_CA_R | ACGTTGGATGCTCATCTACTGTATCGTGTGC | sf005138_03AG_CA_Pa  | GGGGTAGTGTGCATTTCTCCAGGGTCGC  |
| sequenom | SEQ014 | sf004149_01AG | sf004149_01AG_GC_F | ACGTTGGATGGGACTATGTACAACAAGTGG  | sf004149_01AG_GC_R | ACGTTGGATGATGATGGCATGACTATGAGG  | sf004149_01AG_GC_Pa  | CCCTGTATTTTCATCCATATCGGAT     |
| sequenom | SEQ014 | sf004155_01AG | sf004155_01AG_GT_F | ACGTTGGATGGCTTTTGCTTTTACTACGGC  | sf004155_01AG_GT_R | ACGTTGGATGGATGCTGGTAGCCTAGAATA  | sf004155_01AG_GT_P   | CAGCCTAGAATAAATGTTATGGAAG     |
| sequenom | SEQ014 | sf004209_01GT | sf004209_01GT_AT_F | ACGTTGGATGCCTCACGCTAACAATTACCC  | sf004209_01GT_AT_R | ACGTTGGATGATCCCCAACACTCCTTTGTC  | sf004209_01GT_AT_P   | CACGCCTTTGCTGCTACTATAGGC      |
| sequenom | SEQ014 | sf004240_01AG | sf004240_01AG_GA_F | ACGTTGGATGTAACTCCCCCTCATACTC    | sf004240_01AG_GA_R | ACGTTGGATGTATGACACCTCCAATGTGGG  | sf004240_01AG_GA_Pa  | CAGACAAAAAAGTCTCGA            |
| sequenom | SEQ014 | sf004252_02GT | sf004252_02GT_GT_F | ACGTTGGATGGTTCATGTCTCAGACACTGG  | sf004252_02GT_GT_R | ACGTTGGATGTGAGGAGGTATTAAGTCCAG  | sf004252_02GT_GT_P   | TGAAGGCTGCTGTGGCTCTGCT        |
| sequenom | SEQ014 | sf004257_02CG | sf004257_02CG_GA_F | ACGTTGGATGTTATGTTCCACAAGTGGCCC  | sf004257_02CG_GA_R | ACGTTGGATGTTAACATGGCAAGACAGAAC  | sf004257_02CG_GA_Pa  | AGACAGAACAAATCTTATTTACAA      |
| sequenom | SEQ014 | sf004260_01AT | sf004260_01AT_TC_F | ACGTTGGATGCAGAACTGGCAGATGGAAAG  | sf004260_01AT_TC_R | ACGTTGGATGATTTGTCTTCTGCCGTTCCC  | sf004260_01AT_TC_Pa  | TCTTTCCAATGCCACAA             |
| sequenom | SEQ014 | sf004387_01AG | sf004387_01AG_TC_F | ACGTTGGATGTCATTAGTCTGCATCTGCG   | sf004387_01AG_TC_R | ACGTTGGATGCCTACGTGTTAGATACAGGC  | sf004387_01AG_TC_Pa  | CTGCAACATTTCCAGTACAC          |
| sequenom | SEQ014 | sf004426_01AG | sf004426_01AG_CT_F | ACGTTGGATGGAAGCACTGCTTTGTTACGG  | sf004426_01AG_CT_R | ACGTTGGATGAGCAAAGCCCTACATCTCTG  | sf004426_01AG_CT_P   | CTGTTCTGAATACAGGCAGCCTACA     |
| sequenom | SEQ014 | sf004438_02CT | sf004438_02CT_CT_F | ACGTTGGATGACTGGACCTGGAAAGATTGG  | sf004438_02CT_CT_R | ACGTTGGATGGTTAGTAGCCTAATTCACAG  | sf004438_02CT_CT_P   | GGTAACAGTAAACAATAGAGCTAGA     |
| sequenom | SEQ014 | sf004529_01CT | sf004529_01CT_AT_F | ACGTTGGATGGATCTCATTTTAGCAGCGAC  | sf004529_01CT_AT_R | ACGTTGGATGGGCCAGATATTGCAATTGCG  | sf004529_01CT_AT_P   | CTCCATCAGACAAGTGAC            |
| sequenom | SEQ014 | sf004545_01AC | sf004545_01AC_CA_F | ACGTTGGATGCCTTATATTAACAACACCAG  | sf004545_01AC_CA_R | ACGTTGGATGTGTCTTAGTGTGGTGTGCC   | sf004545_01AC_CA_Pa  | TTTTATTGTAATTTATTTTGTTTACAATT |
| sequenom | SEQ014 | sf004562_01AG | sf004562_01AG_CA_F | ACGTTGGATGTCAAAGTGCACAGTGAGGAG  | sf004562_01AG_CA_R | ACGTTGGATGTAACCTATTGGCTAGCCCAG  | sf004562_01AG_CA_Pa  | GTTAGGAATGGTCAACACAG          |
| sequenom | SEQ014 | sf004632_01AG | sf004632_01AG_CT_F | ACGTTGGATGGAAAGACAAATGTTTCTTTCG | sf004632_01AG_CT_R | ACGTTGGATGAGAGTAGGTGTATAACGTGG  | sf004632_01AG_CT_P   | CAACGATAACTAAGAAGTAGAA        |
| sequenom | SEQ014 | sf004642_07AG | sf004642_07AG_AG_F | ACGTTGGATGCGTCCATAATGTCAACAGGG  | sf004642_07AG_AG_R | ACGTTGGATGACCTCTGGTTTGGAGTTGTG  | sf004642_07AG_AG_P   | GGGAGGGGTGATTGAACTGCAC        |
| sequenom | SEQ014 | sf004684_01AG | sf004684_01AG_AT_F | ACGTTGGATGGTAGGTTGGTAAGACTGGAG  | sf004684_01AG_AT_R | ACGTTGGATGAACTGACATGCCAAGGATCG  | sf004684_01AG_AT_P   | ACTCATATCGACCATATATTGTGTTCCC  |
| sequenom | SEQ014 | sf004732_01CG | sf004732_01CG_CT_F | ACGTTGGATGTTCAACAGACTTTTCCCGC   | sf004732_01CG_CT_R | ACGTTGGATGAGATTGCCTCTGACTGTTCC  | sf004732_01CG_CT_P   | TTCCCCACGTTCTTTG              |
| sequenom | SEQ014 | sf004762_01AT | sf004762_01AT_CT_F | ACGTTGGATGTCGCTTGACGAATGTTGAG   | sf004762_01AT_CT_R | ACGTTGGATGATAACAGCAGCAGAGGAGTC  | sf004762_01AT_CT_P   | CCCCTCTCATCGGCAACTAATA        |
| sequenom | SEQ014 | sf004765_01CG | sf004765_01CG_CT_F | ACGTTGGATGGCACCTGTAATGAGTGAATG  | sf004765_01CG_CT_R | ACGTTGGATGGTTGTGTGACTCATGCTG    | sf004765_01CG_CT_P   | TTACCACAAGGGATGACAA           |
| sequenom | SEQ014 | sf004817_02GT | sf004817_02GT_CG_F | ACGTTGGATGTGGGTGTCATAAAGAAAGGG  | sf004817_02GT_CG_R | ACGTTGGATGACTGTCCCTATTCCTGTTAG  | sf004817_02GT_CG_P   | GACATGACTTTACCATGTTG          |
| sequenom | SEQ014 | sf004818_06CT | sf004818_06CT_CA_F | ACGTTGGATGGGGATAGCCAATCCAGATTC  | sf004818_06CT_CA_R | ACGTTGGATGCATTAAGGCCACATAGCACC  | sf004818_06CT_CA_Pa  | CGGAGTTGGTCATTTTGG            |
| sequenom | SEQ014 | sf004848_01CT | sf004848_01CT_AT_F | ACGTTGGATGCAAGACATGGCATAAGAGGG  | sf004848_01CT_AT_R | ACGTTGGATGTAACGACGAACGATTGCTTG  | sf004848_01CT_AT_P   | TAAAGTATCGTCCAACCC            |

|          |        |               |                    |                                 |                    |                                  |                     |                                |
|----------|--------|---------------|--------------------|---------------------------------|--------------------|----------------------------------|---------------------|--------------------------------|
| sequenom | SEQ014 | sf004870_01CG | sf004870_01CG_GA_F | ACGTTGGATGCACGCCTTACAACAGAATAG  | sf004870_01CG_GA_R | ACGTTGGATGGAAGTCTGCCAGTCAAAG     | sf004870_01CG_GA_Pa | GAGGATTAATAATTATACTGTACAAG     |
| sequenom | SEQ014 | sf004904_09CT | sf004904_09CT	CG_F | ACGTTGGATGGGCATGCAGAGTTCAATTAG  | sf004904_09CT	CG_R | ACGTTGGATGAAGACCGGGCATTCAACTTG   | sf004904_09CT	CG_P  | TTGAAGTTGATACTGTTTCCATGGTAA    |
| sequenom | SEQ014 | sf004909_01GT | sf004909_01GT_TA_F | ACGTTGGATGGCCCTGTAACTCCTTAGTG   | sf004909_01GT_TA_R | ACGTTGGATGATGGGACAATGATCACTGAG   | sf004909_01GT_TA_Pa | GAGCACTGAGATCATATGCAAAT        |
| sequenom | SEQ014 | sf004913_01GT | sf004913_01GT_CA_F | ACGTTGGATGGAAGCCAGATGTTAAGATGAC | sf004913_01GT_CA_R | ACGTTGGATGCCCCAGATTTGAGTCTGTAG   | sf004913_01GT_CA_P  | TTTCAAATGACAAGGCAATCTCACAA     |
| sequenom | SEQ014 | sf004975_01CG | sf004975_01CG_TC_F | ACGTTGGATGGGAAGTTTGCTGCAAATGAG  | sf004975_01CG_TC_R | ACGTTGGATGAACGGCCTCGTACTCTATTC   | sf004975_01CG_TC_Pa | CAGCCTCGTACTCTATTCTAGATC       |
| sequenom | SEQ014 | sf004977_01AT | sf004977_01AT_CT_F | ACGTTGGATGGCCTTGATGTTTCATCAGTCC | sf004977_01AT_CT_R | ACGTTGGATGAGTCATCTTTCCCTCCAGC    | sf004977_01AT_CT_P  | CCTCTCCATTTATAGACAATTTGTC      |
| sequenom | SEQ014 | sf005000_09CT | sf005000_09CT_TC_F | ACGTTGGATGATGCCGTTCTGTACCATCAC  | sf005000_09CT_TC_R | ACGTTGGATGCCTAACAAATCCACAACACTAC | sf005000_09CT_TC_Pa | GTCCACAACACTACTACCTTATACAC     |
| sequenom | SEQ014 | sf005054_02AC | sf005054_02AC_GA_F | ACGTTGGATGCCACCCAACACTCAATTCC   | sf005054_02AC_GA_R | ACGTTGGATGTGTTCTCAATTGAGGCGCAG   | sf005054_02AC_GA_Pa | GAGGCGCAGATAAGCG               |
| sequenom | SEQ014 | sf005079_01AG | sf005079_01AG_CA_F | ACGTTGGATGACCCACCATCACAACCTCGAC | sf005079_01AG_CA_R | ACGTTGGATGGAACATCTGAAATATTGTCTG  | sf005079_01AG_CA_P  | ATTCCGATCTGTGTCTTTCCATTGCTGTG  |
| sequenom | SEQ014 | sf005248_01AG | sf005248_01AG_CT_F | ACGTTGGATGTTGCTGGGATTTACCACCAC  | sf005248_01AG_CT_R | ACGTTGGATGGGGTAGCCAATCCAGATTTT   | sf005248_01AG_CT_P  | TTACACACTCAGGTATAGCAC          |
| sequenom | SEQ014 | sf005272_01CG | sf005272_01CG_GC_F | ACGTTGGATGAGATGAGGGAGTGTGAGAG   | sf005272_01CG_GC_R | ACGTTGGATGTTAGCCATTTTCTCCCCG     | sf005272_01CG_GC_Pa | CCGGTGTCTGTGACT                |
| sequenom | SEQ014 | sf005409_04AT | sf005409_04AT_CA_F | ACGTTGGATGAGATGTATTGGAGTAGTGCC  | sf005409_04AT_CA_R | ACGTTGGATGTCAGGCATTTACAGCCTCAC   | sf005409_04AT_CA_P  | TGTGGTATGGCATCAGACAGAAAT       |
| sequenom | SEQ014 | sf005410_01AG | sf005410_01AG_CA_F | ACGTTGGATGGGATGAGCAATGTCAGAGCG  | sf005410_01AG_CA_R | ACGTTGGATGTATCCATGCCAATGGGAAC    | sf005410_01AG_CA_Pa | ACTCCATTCCGGCTCCA              |
| sequenom | SEQ014 | sf005420_01CG | sf005420_01CG_GA_F | ACGTTGGATGTTGAAGATGGTGTGTTCTC   | sf005420_01CG_GA_R | ACGTTGGATGGATGCCATCAAGGCCAAAAC   | sf005420_01CG_GA_Pa | ACACTTTAGTGTTTAAAGCA           |
| sequenom | SEQ015 | sf000020_CT   | sf000020_CT_CT_F   | ACGTTGGATGGGCGATCTCTGTTCTTAATG  | sf000020_CT_CT_R   | ACGTTGGATGGGTAAAGTGGTAGAGGTAGC   | sf000020_CT_CT_P    | AGATCAGATTATTCTTTGTGAGAG       |
| sequenom | SEQ015 | sf000382_AG   | sf000382_AG_GA_F   | ACGTTGGATGTGGCAAAATCAAAGCCAGAC  | sf000382_AG_GA_R   | ACGTTGGATGGTTTGTAGACTGGCTACATC   | sf000382_AG_GA_Pa   | GGCTACATCTTATATCATCATCT        |
| sequenom | SEQ015 | sf000508_CT   | sf000508_CT_TC_F   | ACGTTGGATGGTGTGTGACATATTCTCCCC  | sf000508_CT_TC_R   | ACGTTGGATGTTGCTCAGAGAGCCAGAGAG   | sf000508_CT_TC_Pa   | GAGTTACACAGAGACGTGTCATC        |
| sequenom | SEQ015 | sf000559_AG   | sf000559_AG_GA_F   | ACGTTGGATGGGTGATAGTGGGACTGATAG  | sf000559_AG_GA_R   | ACGTTGGATGAAGAAGAGCAGTTGCCAG     | sf000559_AG_GA_Pa   | GGGTGTCCTTCTCCTTCATAGGAC       |
| sequenom | SEQ015 | sf000681_AT   | sf000681_AT_AT_F   | ACGTTGGATGGATACTCCACACAAAACCC   | sf000681_AT_AT_R   | ACGTTGGATGGAGGTATGAGGTATTGGAGG   | sf000681_AT_AT_P    | GCAAGGTAAAGTATGTAGTAT          |
| sequenom | SEQ015 | sf000684_CT   | sf000684_CT_TC_F   | ACGTTGGATGTGTATAATGAGTAGGCCCCC  | sf000684_CT_TC_R   | ACGTTGGATGGCATGCTCCACTTTTGAACC   | sf000684_CT_TC_Pa   | CCCCTCTTTGTATAACCTATGCATACAC   |
| sequenom | SEQ015 | sf000744_AT   | sf000744_AT_AT_F   | ACGTTGGATGCAGTGAAGGGAACCTGACCAC | sf000744_AT_AT_R   | ACGTTGGATGCACTCGGTATGTTCTTCTC    | sf000744_AT_AT_P    | CTATGGTCTTCTCTGTATCTTGAGAGCTG  |
| sequenom | SEQ015 | sf001105_AG   | sf001105_AG_AG_F   | ACGTTGGATGTGTCTCTGAAAGCACCAATC  | sf001105_AG_AG_R   | ACGTTGGATGTACCACACATGGCACATGAG   | sf001105_AG_AG_P    | CCTCTTATATTAATAACTCCCCTGTAGT   |
| sequenom | SEQ015 | sf001667_AG   | sf001667_AG_GA_F   | ACGTTGGATGGCCTCTCACACAACTGTAG   | sf001667_AG_GA_R   | ACGTTGGATGAGTCACTGCAATTCACAGCC   | sf001667_AG_GA_Pa   | TGGGCCGGGTTTAGATT              |
| sequenom | SEQ015 | sf001831_AC   | sf001831_AC_CA_F   | ACGTTGGATGCCAGTACATTTCCAGCTGTG  | sf001831_AC_CA_R   | ACGTTGGATGTCATTGGTATCAACTGATGC   | sf001831_AC_CA_Pa   | CTCCTCAACTGATGCCCTACT          |
| sequenom | SEQ015 | sf002145	CG   | sf002145	CG	CG_F   | ACGTTGGATGTCTGACAGGTACACACACAG  | sf002145	CG	CG_R   | ACGTTGGATGGTCATTCTGGACAGGAGTTC   | sf002145	CG	CG_P    | GCAGTCTGGACAGGAGTTCCTACAGTA    |
| sequenom | SEQ015 | sf003455_AG   | sf003455_AG_AG_F   | ACGTTGGATGATAACCAGTAGGGCAACGTC  | sf003455_AG_AG_R   | ACGTTGGATGTATACGAAGTCGCTGACAAC   | sf003455_AG_AG_P    | GGTCGTTGATATAAATGTTAATGAATTAGC |
| sequenom | SEQ015 | sf003520_AG   | sf003520_AG_GA_F   | ACGTTGGATGGATGCAGGGAGACAGATTG   | sf003520_AG_GA_R   | ACGTTGGATGATGAGAGAGGATAGAAAGGG   | sf003520_AG_GA_Pa   | GGCAGAATGAATATCATGTCAATTA      |
| sequenom | SEQ015 | sf003994_GT   | sf003994_GT_GT_F   | ACGTTGGATGCCCCATGTATGTTTCTCAAG  | sf003994_GT_GT_R   | ACGTTGGATGTCAAGCCCCAACAAATATAGG  | sf003994_GT_GT_P    | ACCTCTTAAAGAGCTACACATTTGT      |

|          |        |              |                   |                                 |                   |                                 |                   |                                |
|----------|--------|--------------|-------------------|---------------------------------|-------------------|---------------------------------|-------------------|--------------------------------|
| sequenom | SEQ015 | sf004013_AC  | sf004013_AC_CA_F  | ACGTTGGATGTGTGTTGTGCGTGCATG     | sf004013_AC_CA_R  | ACGTTGGATGGGATTTGGGAAGTGAAGTGC  | sf004013_AC_CA_P  | CCTCACACTGACACCA               |
| sequenom | SEQ015 | sf004038_AG  | sf004038_AG_AG_F  | ACGTTGGATGAACTAGAGCGGATAACCATC  | sf004038_AG_AG_R  | ACGTTGGATGCCGGGTGAAGATAACAATG   | sf004038_AG_AG_P  | CCCCAGGGTTAAACCGTTCC           |
| sequenom | SEQ015 | sf004090_CG  | sf004090_CG_GC_F  | ACGTTGGATGAATAAACCCAGGCCAGAGATG | sf004090_CG_GC_R  | ACGTTGGATGCCGGCCTTTATGGTTTTGC   | sf004090_CG_GC_Pa | CCGCTGTCAACCTCTATT             |
| sequenom | SEQ015 | sf004131_AG  | sf004131_AG_AG_F  | ACGTTGGATGAAAAACCCAAACCAGGAAC   | sf004131_AG_AG_R  | ACGTTGGATGAGATTCTGCGTGTAAACGCC  | sf004131_AG_AG_P  | GGGGTACGTAGAATGATGTGATTAC      |
| sequenom | SEQ015 | sf004357_CT  | sf004357_CT_CT_F  | ACGTTGGATGAACTGCAAACATGGCAACCC  | sf004357_CT_CT_R  | ACGTTGGATGATGTCTAATTCCTCCGCTCC  | sf004357_CT_CT_P  | TGTTGCAGCAATGATAATGTGGA        |
| sequenom | SEQ015 | sf004379_CT  | sf004379_CT_TC_F  | ACGTTGGATGGTGAGGTCAACTCAGAGTTC  | sf004379_CT_TC_R  | ACGTTGGATGGTTTCTAGGTGACCTGGAG   | sf004379_CT_TC_Pa | GACCTGGAGGTGAGCC               |
| sequenom | SEQ015 | sf004475_CT  | sf004475_CT_TC_F  | ACGTTGGATGCCGATGTTGTACTTTGAGC   | sf004475_CT_TC_R  | ACGTTGGATGTTTGTGCCAAATGGCACC    | sf004475_CT_TC_Pa | ATGGCACCTATGTATAATACACTATATA   |
| sequenom | SEQ015 | sf004521_CG  | sf004521_CG_GC_F  | ACGTTGGATGGATCCATGTGATTCGTGCC   | sf004521_CG_GC_R  | ACGTTGGATGGTGTGACAGAGAAACGTTAC  | sf004521_CG_GC_P  | ACATATAGTGATATAAATGATTTTGATA   |
| sequenom | SEQ015 | sf004541_AC  | sf004541_AC_CA_F  | ACGTTGGATGCCCTCTTTTCTCATTCTC    | sf004541_AC_CA_R  | ACGTTGGATGCGCATGACACCACAATTGAG  | sf004541_AC_CA_Pa | CCCATCTAACTAAATCCCAGACGACA     |
| sequenom | SEQ015 | sf004614_AG  | sf004614_AG_AG_F  | ACGTTGGATGGGAACTAGCGCTATCAATGG  | sf004614_AG_AG_R  | ACGTTGGATGCAGGCCTGATTTCCACATA   | sf004614_AG_AG_P  | CCTTTTCCACATAATTCCTTCACTC      |
| sequenom | SEQ015 | sf004897_AT  | sf004897_AT_TA_F  | ACGTTGGATGGTGGCTATGACGGTGATTC   | sf004897_AT_TA_R  | ACGTTGGATGTTTTGCGTCTGTTCCCCC    | sf004897_AT_TA_Pa | GGCATAGTGCCTATTAAG             |
| sequenom | SEQ015 | sf005186_CT  | sf005186_CT_TC_F  | ACGTTGGATGCCTTTCTCCAACCTCCATC   | sf005186_CT_TC_R  | ACGTTGGATGGTTGACAGGGCTTTGTTAG   | sf005186_CT_TC_Pa | CTTGTTAGTAACACTCTAGA           |
| sequenom | SEQ015 | sf005258_AC  | sf005258_AC_CA_F  | ACGTTGGATGTTGGCTTCTGGCTTGTAAC   | sf005258_AC_CA_R  | ACGTTGGATGAGAGCTCCCCATCTGATAG   | sf005258_AC_CA_Pa | CGATAGCAGAGTCGAAGTA            |
| sequenom | SEQ015 | sf005286_CT  | sf005286_CT_CT_F  | ACGTTGGATGAAAAAGTTGACGCGCTCTG   | sf005286_CT_CT_R  | ACGTTGGATGCCACTTTTCCCGATTACC    | sf005286_CT_CT_P  | ACTTGCACGATCTACAC              |
| sequenom | SEQ015 | sf005443_CG  | sf005443_CG_GC_F  | ACGTTGGATGGCAATCACAAACCAATTGAGC | sf005443_CG_GC_R  | ACGTTGGATGTCCATCTTGCCATCCATTC   | sf005443_CG_GC_Pa | TCAAGCGTTGAAGTCAATATCT         |
| sequenom | SEQ015 | sf005501_AG  | sf005501_AG_GA_F  | ACGTTGGATGAGACACATCCTGCCATTTGC  | sf005501_AG_GA_R  | ACGTTGGATGTTTTCCAAGTACCAAAGCTG  | sf005501_AG_GA_Pa | ATGTTCTTACTCTGTGG              |
| sequenom | SEQ015 | sf005540_CT  | sf005540_CT_TC_F  | ACGTTGGATGCAGAGCATTTATCCCACAAC  | sf005540_CT_TC_R  | ACGTTGGATGTGGACATCTCAATTTCTCCC  | sf005540_CT_TC_Pa | ACTTATGCAAACACTTGCACATGACCT    |
| sequenom | SEQ015 | sf005590_CT  | sf005590_CT_TC_F  | ACGTTGGATGTGCAGTGTGTGACTGAAAGC  | sf005590_CT_TC_R  | ACGTTGGATGATGTGACATGTGACGGTGAG  | sf005590_CT_TC_Pa | AGGGGAGACAGTGATAGTGGTAT        |
| sequenom | SEQ015 | sf005652_AG  | sf005652_AG_GA_F  | ACGTTGGATGGAGCGGAGCATGAATATGA   | sf005652_AG_GA_R  | ACGTTGGATGTGATTTAGGCTGTCGCTG    | sf005652_AG_GA_Pa | GACACCATTTCACTGTTGT            |
| sequenom | SEQ015 | sf005654_CT  | sf005654_CT_CT_F  | ACGTTGGATGATCTACCGCACAACTCTCAC  | sf005654_CT_CT_R  | ACGTTGGATGTAATGACGTTTCTGGCGGG   | sf005654_CT_CT_P  | CTCACTATAGCCTTTGCATCACACTGTTGT |
| sequenom | SEQ015 | sf005769_CTb | sf005769_CTb_CT_F | ACGTTGGATGGCCGCTGAAAAGAATCCTTG  | sf005769_CTb_CT_R | ACGTTGGATGTGTATCTGGACCACACTG    | sf005769_CTb_CT_P | TTTCTCTGAGAGCA                 |
| sequenom | SEQ015 | sf006000_AG  | sf006000_AG_GA_F  | ACGTTGGATGATTGACACACCATAAGTAGC  | sf006000_AG_GA_R  | ACGTTGGATGACGTTGGCAGATGCAGTGGA  | sf006000_AG_GA_Pa | GATGCAGTGGATTGAGA              |
| sequenom | SEQ015 | sf006410_AG  | sf006410_AG_GA_F  | ACGTTGGATGCTGTTGAAAAGGCAGTCATC  | sf006410_AG_GA_R  | ACGTTGGATGACTCAAGACCCTCACATAAG  | sf006410_AG_GA_Pa | AACCATGTTCTATGATTTCTAATATTT    |
| sequenom | SEQ016 | sf000518_GT  | sf000518_GT_GT_F  | ACGTTGGATGCCACTTCACTGTTATGCTGG  | sf000518_GT_GT_R  | ACGTTGGATGGGCTAGTGGAAAGAAGACATC | sf000518_GT_GT_P  | GCTGAGAAACCATTGAGCTCAGAAATAT   |
| sequenom | SEQ016 | sf000554_CT  | sf000554_CT_TC_F  | ACGTTGGATGCAGTTGACTGTGTCTCTAC   | sf000554_CT_TC_R  | ACGTTGGATGCTAGCCAGGTCTCTAGACAG  | sf000554_CT_TC_Pa | GAGGGGAGAGACAGCATGCATGTA       |
| sequenom | SEQ016 | sf000656_AG  | sf000656_AG_GA_F  | ACGTTGGATGCCGACTGCATATGAATAGAG  | sf000656_AG_GA_R  | ACGTTGGATGTACGCGTATTGGATTCTCTG  | sf000656_AG_GA_Pa | ATCCAATAAATTTCTCCAATCA         |
| sequenom | SEQ016 | sf001196_AG  | sf001196_AG_GA_F  | ACGTTGGATGAATGGGATACGCTGTCTGAG  | sf001196_AG_GA_R  | ACGTTGGATGTACAGTCACTTTGCCATCC   | sf001196_AG_GA_Pa | GCTTGCGTTAATGACCT              |
| sequenom | SEQ016 | sf001288_CT  | sf001288_CT_CT_F  | ACGTTGGATGAGACCAGACACAAACATGAG  | sf001288_CT_CT_R  | ACGTTGGATGTCCAGTACCAGATGGATTG   | sf001288_CT_CT_P  | AGCTTATTCATCTGCCACA            |

|          |        |             |                  |                                 |                  |                                 |                   |                                |
|----------|--------|-------------|------------------|---------------------------------|------------------|---------------------------------|-------------------|--------------------------------|
| sequenom | SEQ016 | sf001359_AG | sf001359_AG_GA_F | ACGTTGGATGCCGGAGTGCTTATAGTACAG  | sf001359_AG_GA_R | ACGTTGGATGCATCCCTTTCCTTTGAATAC  | sf001359_AG_GA_Pa | GGCGTTGAATACACATTGTCATTTATATCA |
| sequenom | SEQ016 | sf001812_AG | sf001812_AG_AG_F | ACGTTGGATGTGTGCAACTGCAGCTTTACG  | sf001812_AG_AG_R | ACGTTGGATGCCCATCTGCTGGAACCAAC   | sf001812_AG_AG_P  | TGGAACCAACCCCTTTC              |
| sequenom | SEQ016 | sf001916_AG | sf001916_AG_GA_F | ACGTTGGATGAAGAACAGTGTACCGGAAAG  | sf001916_AG_GA_R | ACGTTGGATGCGGCAAGTTAGCTAATGTTT  | sf001916_AG_GA_Pa | GTTCCGAATATGAGGCAATC           |
| sequenom | SEQ016 | sf002018_AC | sf002018_AC_CA_F | ACGTTGGATGGATTGAGGTGGAGCTGATTG  | sf002018_AC_CA_R | ACGTTGGATGCCAGGAAGGTTTTATAACTG  | sf002018_AC_CA_P  | ACAGGAAGGTTTTATAACTGTAATAA     |
| sequenom | SEQ016 | sf002131_AG | sf002131_AG_GA_F | ACGTTGGATGGTCATCAGTATCACATTGGC  | sf002131_AG_GA_R | ACGTTGGATGCTGACACTGCTATCTTTGCC  | sf002131_AG_GA_Pa | GGGGAGTCTATTAACATGGAGTCATGTA   |
| sequenom | SEQ016 | sf002439_CT | sf002439_CT_CT_F | ACGTTGGATGTTCCACGGCCTGTAAGTAAC  | sf002439_CT_CT_R | ACGTTGGATGGATAACACGCTGAGTCAACC  | sf002439_CT_CT_P  | CGCTGAGTCAACCTAAAGAT           |
| sequenom | SEQ016 | sf002640_AG | sf002640_AG_AG_F | ACGTTGGATGCCCTTACACAATCAGTTTGC  | sf002640_AG_AG_R | ACGTTGGATGCTTGAGATGATCCACAGG    | sf002640_AG_AG_P  | TGTCAACTCTCCCTCC               |
| sequenom | SEQ016 | sf003633_AG | sf003633_AG_GA_F | ACGTTGGATGGAAGGTATTGTGAGAGACGC  | sf003633_AG_GA_R | ACGTTGGATGTACACACTCCACATGGAAC   | sf003633_AG_GA_Pa | CACATGGAACATTAAGAACAAG         |
| sequenom | SEQ016 | sf003647_CG | sf003647_CG_GC_F | ACGTTGGATGGCAATCACAACCAATTGAGC  | sf003647_CG_GC_R | ACGTTGGATGCCATCTTGCCATCCATTC    | sf003647_CG_GC_Pa | CTCTGTCAAGCGTTGAAGTCAATATCT    |
| sequenom | SEQ016 | sf003788_GT | sf003788_GT_GT_F | ACGTTGGATGTTATTGCAGTCCATTTGTG   | sf003788_GT_GT_R | ACGTTGGATGCTCCATCAAGAAGTCATGGG  | sf003788_GT_GT_Pa | GAATCTTGAGCTATCAGTTATCCTGTAT   |
| sequenom | SEQ016 | sf004056_CT | sf004056_CT_TC_F | ACGTTGGATGGAAGGATGTCATTGGACCAG  | sf004056_CT_TC_R | ACGTTGGATGAACCTCTGGATTGCAAGGG   | sf004056_CT_TC_Pa | CTTAATCAAATCTCCCTTGAATCTATC    |
| sequenom | SEQ016 | sf004192_AG | sf004192_AG_GA_F | ACGTTGGATGGTGTGAGAATAGCCTAGATG  | sf004192_AG_GA_R | ACGTTGGATGTGGGAGTCTGCTGAATAGTC  | sf004192_AG_GA_Pa | AGAAAATCTTAGGATTTTGATACCATTATA |
| sequenom | SEQ016 | sf004214_AG | sf004214_AG_GA_F | ACGTTGGATGAACTACCTGTACCCTTTGTC  | sf004214_AG_GA_R | ACGTTGGATGGGGTGTGATTTATCAGTATG  | sf004214_AG_GA_Pa | CCCTTACTCTTCAAATTCTACTGTATGA   |
| sequenom | SEQ016 | sf004288_AG | sf004288_AG_GA_F | ACGTTGGATGGAAGCATAGTGAATTAAC    | sf004288_AG_GA_R | ACGTTGGATGCCTAACCCACTACAATATG   | sf004288_AG_GA_Pa | TTCACCCAAAAGGCATT              |
| sequenom | SEQ016 | sf004416_AC | sf004416_AC_CA_F | ACGTTGGATGTCCCGTTGTTGATGCTTGG   | sf004416_AC_CA_R | ACGTTGGATGTCTCCATATGTATCAGCAG   | sf004416_AC_CA_P  | GGGGAGCAGAAATAAGACCGAT         |
| sequenom | SEQ016 | sf004423_AG | sf004423_AG_AG_F | ACGTTGGATGACACAGCAGTGAATCTTTCC  | sf004423_AG_AG_R | ACGTTGGATGGGCCACCTAATCAACATTTT  | sf004423_AG_AG_P  | TTCCACAAGGTCTTCCCTG            |
| sequenom | SEQ016 | sf004714_CT | sf004714_CT_CT_F | ACGTTGGATGCAGATGCAGACTCAGATTTT  | sf004714_CT_CT_R | ACGTTGGATGACACATTGGCTGTGTACAGG  | sf004714_CT_CT_P  | ATACTGGTGCATAGAGTTGTA          |
| sequenom | SEQ016 | sf004795_CT | sf004795_CT_CT_F | ACGTTGGATGGGGATCTTTCAAGAAGCTTAG | sf004795_CT_CT_R | ACGTTGGATGCCAGCAGTTATGTCATGCAG  | sf004795_CT_CT_P  | AGAAATAAGGCATAACTGTTAAGAA      |
| sequenom | SEQ016 | sf004811_AT | sf004811_AT_TA_F | ACGTTGGATGCATGAAGAAAATCAAGGTCTC | sf004811_AT_TA_R | ACGTTGGATGCTCTTCAAACAACCTGTGTC  | sf004811_AT_TA_Pa | AATACCCGTTATAGCATAATCGTTA      |
| sequenom | SEQ016 | sf004890_AC | sf004890_AC_CA_F | ACGTTGGATGGAACAGAGCAATACTCAGTC  | sf004890_AC_CA_R | ACGTTGGATGAGGTTTCTACCCTACATTTCC | sf004890_AC_CA_P  | TCTATAGAATTTCTTAATATTATGTAGTT  |
| sequenom | SEQ016 | sf004917_CT | sf004917_CT_TC_F | ACGTTGGATGAGCAATAAGATATGTTGGGG  | sf004917_CT_TC_R | ACGTTGGATGAATCTGTTTCTGCCGTCTG   | sf004917_CT_TC_Pa | AGGGGTAGGGGACTTGCCTGAAC        |
| sequenom | SEQ016 | sf004984_AG | sf004984_AG_GA_F | ACGTTGGATGGGGATGTGCAGACATTATTC  | sf004984_AG_GA_R | ACGTTGGATGTGCACCCATAGTTATGTCAC  | sf004984_AG_GA_Pa | CATAGTTATGTCATGCTTTTC          |
| sequenom | SEQ016 | sf005052_AG | sf005052_AG_GA_F | ACGTTGGATGTAGAACCGATCTGGGACTC   | sf005052_AG_GA_R | ACGTTGGATGATTACACATACCCGAGACCC  | sf005052_AG_GA_Pa | TACCCGTGACAATCAGATCAGA         |
| sequenom | SEQ016 | sf005168_AC | sf005168_AC_CA_F | ACGTTGGATGGGCCAGTGGAAATGAATAG   | sf005168_AC_CA_R | ACGTTGGATGTGAGTGTACTTCTCCCGTG   | sf005168_AC_CA_Pa | AATGTGGTGGATTATTGAAG           |
| sequenom | SEQ016 | sf005344_AT | sf005344_AT_TA_F | ACGTTGGATGCACAAGCGTCATGTCTTC    | sf005344_AT_TA_R | ACGTTGGATGATTAACCCCTTTTGGGTAG   | sf005344_AT_TA_Pa | TTTGGGTAGGCACAAA               |
| sequenom | SEQ016 | sf005440_CT | sf005440_CT_TC_F | ACGTTGGATGGATACAAGGAAAAAGATTGG  | sf005440_CT_TC_R | ACGTTGGATGTCCACAACATGAACAGACAC  | sf005440_CT_TC_Pa | CCAATGAACAGACACAATATCAC        |
| sequenom | SEQ016 | sf005459_AC | sf005459_AC_CA_F | ACGTTGGATGAAGCATAATGGAGTCCCTG   | sf005459_AC_CA_R | ACGTTGGATGGTCTGATTACCTCATGCAG   | sf005459_AC_CA_Pa | TAAACAGACATGTTAAAAAATG         |
| sequenom | SEQ016 | sf005663_CT | sf005663_CT_TC_F | ACGTTGGATGACAACCTGTTGATCGAGGAC  | sf005663_CT_TC_R | ACGTTGGATGTACAGAGCTGACTGATCAC   | sf005663_CT_TC_Pa | TGGGTGTATGTGTGCGCGA            |



|          |        |              |                   |                                |                   |                                 |                   |                                |
|----------|--------|--------------|-------------------|--------------------------------|-------------------|---------------------------------|-------------------|--------------------------------|
| sequenom | SEQ016 | sf005769_Cta | sf005769_CTa_CT_F | ACGTTGGATGGAGAGCTATCATCCAGATCG | sf005769_CTa_CT_R | ACGTTGGATGGCAAACGTTCTTAGTTGG    | sf005769_CTa_CT_P | AAAGTTGGGCTTCCATAG             |
| sequenom | SEQ016 | sf006000_CT  | sf006000_CT_CT_F  | ACGTTGGATGTTGGCAGATGCAGTGGATTG | sf006000_CT_CT_R  | ACGTTGGATGATTGACACACCATAAGTAGC  | sf006000_CT_CT_P  | AGAGATTTTTGCATGGGC             |
| sequenom | SEQ017 | sf000132_AG  | sf000132_AG_GA_F  | ACGTTGGATGAGTAACACAGATCCGCCTTG | sf000132_AG_GA_R  | ACGTTGGATGATGCTTTATACACCCCGTGC  | sf000132_AG_GA_Pa | GGGAAATTGGGGATTGTGTTTACTTTG    |
| sequenom | SEQ017 | sf000364_AG  | sf000364_AG_GA_F  | ACGTTGGATGCTTGCTCTTGATGAGATG   | sf000364_AG_GA_R  | ACGTTGGATGTCTGCTTCTAGCTCCTATGC  | sf000364_AG_GA_Pa | CCACTACTAGCTCTTCTCTA           |
| sequenom | SEQ017 | sf000505_CT  | sf000505_CT_CT_F  | ACGTTGGATGAACCGACGATTCCATTAG   | sf000505_CT_CT_R  | ACGTTGGATGTGTTTCACTCCACGCTGTTG  | sf000505_CT_CT_P  | CTTTCAGGATTGTCGTCTA            |
| sequenom | SEQ017 | sf000612_AT  | sf000612_AT_AT_F  | ACGTTGGATGCCGACAGACTTCTCAAAC   | sf000612_AT_AT_R  | ACGTTGGATGGCAAATGTCTAGTTGTAATG  | sf000612_AT_AT_P  | AAAATGTCTAGTTGTAATGACGTCA      |
| sequenom | SEQ017 | sf000754_AC  | sf000754_AC_CA_F  | ACGTTGGATGCAGGTTTGTGTGTTTACCG  | sf000754_AC_CA_R  | ACGTTGGATGGAGGGAATAACTCTCATTCTG | sf000754_AC_CA_Pa | AACTCTCATTCTGACATTTTAC         |
| sequenom | SEQ017 | sf000899_CT  | sf000899_CT_CT_F  | ACGTTGGATGACCCTGATGTGCCTTATTGC | sf000899_CT_CT_R  | ACGTTGGATGTGGCTGTGCTTGAATGCTG   | sf000899_CT_CT_P  | ACATGATATACCACGGGTA            |
| sequenom | SEQ017 | sf000991_AT  | sf000991_AT_TA_F  | ACGTTGGATGGGGAATAGTCTATAATAGGC | sf000991_AT_TA_R  | ACGTTGGATGGACTCTTACGAATAGAAC    | sf000991_AT_TA_Pa | TGGATATTACATGACTATTACATGACTATT |
| sequenom | SEQ017 | sf001353_GT  | sf001353_GT_GT_F  | ACGTTGGATGGAGAGTCTGAGGAAGTGTG  | sf001353_GT_GT_R  | ACGTTGGATGATGGACCATAGAGCATGGAG  | sf001353_GT_GT_Pa | GGCATGGAGACTCTCCTC             |
| sequenom | SEQ017 | sf003142_AG  | sf003142_AG_GA_F  | ACGTTGGATGTCTCTGATCAAATCTTCTC  | sf003142_AG_GA_R  | ACGTTGGATGCGAACTTCCATTTAGCATAG  | sf003142_AG_GA_Pa | CAATTTTATATGTACATACTATCTGAT    |
| sequenom | SEQ017 | sf003899_CT  | sf003899_CT_TC_F  | ACGTTGGATGGCACAATGTCCAACAATTCC | sf003899_CT_TC_R  | ACGTTGGATGATGTCACCCTATGACTTTGG  | sf003899_CT_TC_Pa | ACCCTATGACTTTGGAAACAT          |
| sequenom | SEQ017 | sf004211_GT  | sf004211_GT_GT_F  | ACGTTGGATGGCCACTAGCACCAATTATAC | sf004211_GT_GT_R  | ACGTTGGATGCTGGTTCAGAATGCTAAGCC  | sf004211_GT_GT_Pa | CCTAAAATGCTAATATACGCTAACA      |
| sequenom | SEQ017 | sf004254_CT  | sf004254_CT_CT_F  | ACGTTGGATGCGTTTCTCACTTGGAAACAG | sf004254_CT_CT_R  | ACGTTGGATGAGCTCAAGTTGCTCAACTG   | sf004254_CT_CT_P  | TAGGGAAGAGAGATGTACT            |
| sequenom | SEQ017 | sf004319_GT  | sf004319_GT_GT_F  | ACGTTGGATGTATGGGACAGGAAGTCACAG | sf004319_GT_GT_R  | ACGTTGGATGGGCTTGCAAATCCTAAGTGG  | sf004319_GT_GT_Pa | AAGTTTGGTTAAATGGAAATAAACAT     |
| sequenom | SEQ017 | sf004353_AG  | sf004353_AG_GA_F  | ACGTTGGATGGGCTCAATAGCAACACACAG | sf004353_AG_GA_R  | ACGTTGGATGCCTGATTAATGCCAGATCTT  | sf004353_AG_GA_Pa | ACAAAACATGAGCAGC               |
| sequenom | SEQ017 | sf004373_AG  | sf004373_AG_GA_F  | ACGTTGGATGACGCTTAGATAAGTCCCTG  | sf004373_AG_GA_R  | ACGTTGGATGTGAGGTGACAAGGGATACAG  | sf004373_AG_GA_Pa | CCTATTGATTTTTATGGGTGACCTAAC    |
| sequenom | SEQ017 | sf004560_GT  | sf004560_GT_GT_F  | ACGTTGGATGGTGCTGAATCCTGAAGAAC  | sf004560_GT_GT_R  | ACGTTGGATGAGATGGGTGAGGGATATTTG  | sf004560_GT_GT_P  | GAATTGAGCATGGCAGC              |
| sequenom | SEQ017 | sf004583_AC  | sf004583_AC_CA_F  | ACGTTGGATGAGCAGTGGGCTAATCCAAAG | sf004583_AC_CA_R  | ACGTTGGATGGAGTAAGGAAACCCATAGCC  | sf004583_AC_CA_Pa | GCTAACGTTACTTACTTTTAAAT        |
| sequenom | SEQ017 | sf004624_CT  | sf004624_CT_CT_F  | ACGTTGGATGGAACCAGTTTGCTACAGCAC | sf004624_CT_CT_R  | ACGTTGGATGCACTAAGGTCACTTGCAAAC  | sf004624_CT_CT_P  | TCCTGTTGTTGCATGAT              |
| sequenom | SEQ017 | sf004651_AG  | sf004651_AG_AG_F  | ACGTTGGATGAAAGGGTCTCTGTGATGGTG | sf004651_AG_AG_R  | ACGTTGGATGCGAGAGAGAGAAAACAACACG | sf004651_AG_AG_P  | CGTTATACAAGAAAACAACAGATC       |
| sequenom | SEQ017 | sf004685_AGa | sf004685_AGa_AG_F | ACGTTGGATGCTCAGACAGATCCACTGAAC | sf004685_AGa_AG_R | ACGTTGGATGCACTAACAAAGCCAGTGTGC  | sf004685_AGa_AG_P | GTGTGCAGTAGGGCGG               |
| sequenom | SEQ017 | sf004685_CG  | sf004685_CG_GC_F  | ACGTTGGATGCACTAACAAAGCCAGTGTGC | sf004685_CG_GC_R  | ACGTTGGATGCTCAGACAGATCCACTGAAC  | sf004685_CG_GC_Pa | GGGGTACTAGCCGATGATGCAT         |
| sequenom | SEQ017 | sf004839_CT  | sf004839_CT_CT_F  | ACGTTGGATGCGTGCTTTTTCTCAAACCC  | sf004839_CT_CT_R  | ACGTTGGATGTGTCCAAAAGTGCTTGGCAG  | sf004839_CT_CT_P  | GGCTTGGCAGGTCATATTTGATAA       |
| sequenom | SEQ017 | sf004938_CT  | sf004938_CT_TC_F  | ACGTTGGATGCCAATTATGCTTTGCTTTTG | sf004938_CT_TC_R  | ACGTTGGATGCTCAACTGTGAATGGTCTG   | sf004938_CT_TC_Pa | AGTTTGGATTTGGCTTACGTTAATCGT    |
| sequenom | SEQ017 | sf005311_CG  | sf005311_CG.CG_F  | ACGTTGGATGGTTACTTGTGTAGTGGAGTC | sf005311_CG.CG_R  | ACGTTGGATGTGGTTAGCTTACCTACCTG   | sf005311_CG.CG_P  | GCATGGTAGTAACATGAGTTG          |
| sequenom | SEQ017 | sf005440_AG  | sf005440_AG_GA_F  | ACGTTGGATGTGTGCTGTTTATGTTGTGG  | sf005440_AG_GA_R  | ACGTTGGATGAGCTGTAACTTCTCAGCTAC  | sf005440_AG_GA_Pa | TCTGTAACCTTCTCAGCTACATATTG     |
| sequenom | SEQ018 | sf000020_CT  | sf000020_CT_TC_F  | ACGTTGGATGGAGAAGGCCCTAATGCAATG | sf000020_CT_TC_R  | ACGTTGGATGGCGATCTCTGTTCTAATGC   | sf000020_CT_TC_Pa | AGGATGCAACTGACCTGGC            |

|          |        |             |                    |                                 |                    |                                 |                    |                               |
|----------|--------|-------------|--------------------|---------------------------------|--------------------|---------------------------------|--------------------|-------------------------------|
| sequenom | SEQ018 | sf000062_CG | sf000062_CG_CG_F   | ACGTTGGATGGGGTAGTAGTCTGGGTAAAG  | sf000062_CG_CG_R   | ACGTTGGATGCCTTGGAACAAGGATGGAAC  | sf000062_CG_CG_P   | ACGCCACTGAAACACACA            |
| sequenom | SEQ018 | sf000151_AT | sf000151_AT_TA_F   | ACGTTGGATGTTATCATGTGAGGCTCAGGG  | sf000151_AT_TA_R   | ACGTTGGATGGACCTAATAGTCAACGGGAG  | sf000151_AT_TA_Pa  | GACGGGAGTACTCATGATGGCACA      |
| sequenom | SEQ018 | sf000310_AC | sf000310_AC_CA_F   | ACGTTGGATGCTGTGGCTAAACATGTTAAGT | sf000310_AC_CA_R   | ACGTTGGATGGGGAAGAGTACAAACAGAGC  | sf000310_AC_CA_P   | CCTGAAGAGTACAAACAGAGCTGGGAC   |
| sequenom | SEQ018 | sf000364_GT | sf000364_GT_GT_F   | ACGTTGGATGTTGTAATAATGGCGTCGACAG | sf000364_GT_GT_R   | ACGTTGGATGGGAAAAGATCTGTTCTTGCTC | sf000364_GT_GT_P   | AGGAAAGAGCTAGTAATGG           |
| sequenom | SEQ018 | sf001287_CT | sf001287_CT_TC_F   | ACGTTGGATGCTGTCTATATATCGACCAGG  | sf001287_CT_TC_R   | ACGTTGGATGGAGACTTTAAAATCTCAAG   | sf001287_CT_TC_Pa  | GCTCGATATTCAATTAAGAAGCG       |
| sequenom | SEQ018 | sf001394_AT | sf001394_AT_TA_F   | ACGTTGGATGAATGGGATGGGCTCTTAGTG  | sf001394_AT_TA_R   | ACGTTGGATGGCTATGACCTTCATGCAATG  | sf001394_AT_TA_Pa  | AGAGTAAATGAGGTGAGAGATTA       |
| sequenom | SEQ018 | sf001546_AC | sf001546_AC_CA_F   | ACGTTGGATGTACGAGGTGTAGCTGTGATG  | sf001546_AC_CA_R   | ACGTTGGATGGGCTGTCAACAGACAAGTAG  | sf001546_AC_CA_P   | AAGTAGTCACAAACGCAACCACACACA   |
| sequenom | SEQ018 | sf001846_AG | sf001846_AG_AG_F   | ACGTTGGATGCACACTAGATATGGATCACG  | sf001846_AG_AG_R   | ACGTTGGATGATGCTTATCGTTCACCACC   | sf001846_AG_AG_P   | CCGTCGGCTTTAATATTTGACTT       |
| sequenom | SEQ018 | sf002055_AG | sf002055_AG_GA_F   | ACGTTGGATGGACTGATGCATTGTCACCTG  | sf002055_AG_GA_R   | ACGTTGGATGTAAACCCAGTTTGCTGTGC   | sf002055_AG_GA_Pa  | CCACCACTGAATCAGACAGTG         |
| sequenom | SEQ018 | sf002721_GT | sf002721_GT_GT_F   | ACGTTGGATGATTAGTGATGATGGGACTGC  | sf002721_GT_GT_R   | ACGTTGGATGGCCTCTGAAAAACACACTG   | sf002721_GT_GT_Pa  | ACTCTGAAAAACACACTGACTATATGAA  |
| sequenom | SEQ018 | sf003016_AG | sf003016_AG_GA_F   | ACGTTGGATGCCTCTATTTACAGAGGGAAG  | sf003016_AG_GA_R   | ACGTTGGATGGACCAAAGTCCCACAAACAC  | sf003016_AG_GA_Pa  | CCCCCAGCACATAACTACAGATCTTTGTC |
| sequenom | SEQ018 | sf003382_AG | sf003382_AG_GA_F   | ACGTTGGATGGCACTACTTTTGACCAGAGC  | sf003382_AG_GA_R   | ACGTTGGATGTCTAGCACAAACGTCATAAGC | sf003382_AG_GA_Pa  | AACCCATCCCTGTATAGTG           |
| sequenom | SEQ018 | sf003611_AC | sf003611_AC_CA_F   | ACGTTGGATGGACATAGCTCAACATGTCTG  | sf003611_AC_CA_R   | ACGTTGGATGGCTGCAGGAGAATCTAAATG  | sf003611_AC_CA_P   | TGTCGATGTACCTTTATCCAGATAA     |
| sequenom | SEQ018 | sf003639_CT | sf003639_CT_CT_F   | ACGTTGGATGCCGTTGTTATTTTCGAGCGTG | sf003639_CT_CT_R   | ACGTTGGATGAACAAACCTTTAATCCACC   | sf003639_CT_CT_P   | ACAAACCTTTAATCCACCATGTAACC    |
| sequenom | SEQ018 | sf003755_CT | sf003755_CT_TC_F   | ACGTTGGATGGCAGGAGACTTTAAATTGTG  | sf003755_CT_TC_R   | ACGTTGGATGTGTCAGCAACAGAACATGTG  | sf003755_CT_TC_Pa  | TGTGAATTAAGTGGATTATAATTAATAAC |
| sequenom | SEQ018 | sf003922_GT | sf003922_GT_GT_F   | ACGTTGGATGCCACAATGTAAGACATGCAC  | sf003922_GT_GT_R   | ACGTTGGATGCCTTTCCTGGGTAGCTTATC  | sf003922_GT_GT_P   | CAAGGATTTGTGATCACATTCTCA      |
| sequenom | SEQ018 | sf003974_GT | sf003974_GT_GT_F   | ACGTTGGATGTCTTTGTTCCCTACCCTTGC  | sf003974_GT_GT_R   | ACGTTGGATGGGTAGTCACTCTGCTCTTTC  | sf003974_GT_GT_Pa  | ATCTTTCCTGAAGTCCATGATC        |
| sequenom | SEQ018 | sf004008_AG | sf004008_AG_AG_F   | ACGTTGGATGTCTTCAGTTCCAGTTTAGC   | sf004008_AG_AG_R   | ACGTTGGATGCTAGCTGGATAAAACATGGC  | sf004008_AG_AG_P   | AGGATTGAATCCATGAGACTTCTT      |
| sequenom | SEQ018 | sf004045_CT | sf004045_CT_CT_F   | ACGTTGGATGTGTCTCTGTGTGATGCTGTG  | sf004045_CT_CT_R   | ACGTTGGATGCGGATGACATTTTCCACCTG  | sf004045_CT_CT_P   | GAGGAAAAACACCAACGAAAAACAC     |
| sequenom | SEQ018 | sf004434_AT | sf004434_AT_CG_F   | ACGTTGGATGTGCAAGATATGGGCTACTAC  | sf004434_AT_CG_R   | ACGTTGGATGCGAGTGGAAATCCAATAGCC  | sf004434_AT_CG_P   | GGTCTTTGCTTTTTAGACC           |
| sequenom | SEQ018 | sf004471_AG | sf004471_AG_GA_F   | ACGTTGGATGGATTGCCAGTGACATTGTG   | sf004471_AG_GA_R   | ACGTTGGATGGACTCCATCTTCTGGTTGGC  | sf004471_AG_GA_Pa  | TGGTTGGCTCTCTCCGC             |
| sequenom | SEQ018 | sf004521_CG | sf004521_CG_CG02_F | ACGTTGGATGTCACTTAATGGACTCCAGGC  | sf004521_CG_CG02_R | ACGTTGGATGGTGTGAGGAGAAACGTTAC   | sf004521_CG_CG02_P | ACATATAGTGATATAAATGATTTTGTATA |
| sequenom | SEQ018 | sf004656_AC | sf004656_AC_CA_F   | ACGTTGGATGATGTTTCGAAAGCAGGCTCC  | sf004656_AC_CA_R   | ACGTTGGATGTATCTACTGCCGAGAAGTG   | sf004656_AC_CA_Pa  | GGGTTTGCTTATTAAGAGACATAAA     |
| sequenom | SEQ018 | sf004668_AC | sf004668_AC_CA_F   | ACGTTGGATGTCACTGAGATAGCCAAGGAG  | sf004668_AC_CA_R   | ACGTTGGATGTCCAGAAGTGGTTAGATTC   | sf004668_AC_CA_P   | AGTTAGCTGGTTTCTGACGT          |
| sequenom | SEQ018 | sf004712_CT | sf004712_CT_CT_F   | ACGTTGGATGTCCACCTTGCTTATTGCAC   | sf004712_CT_CT_R   | ACGTTGGATGTGAGTATCTTAGCCAGCC    | sf004712_CT_CT_P   | TTGAGCTAACAATTAGCTAAATGACAT   |
| sequenom | SEQ018 | sf004715_AC | sf004715_AC_CA_F   | ACGTTGGATGACTGTACTAGTGCACGTGAC  | sf004715_AC_CA_R   | ACGTTGGATGGGTTTGGTAATGTCCCAC    | sf004715_AC_CA_Pa  | TGTCCACACCCAACC               |
| sequenom | SEQ018 | sf004741_CG | sf004741_CG_CG_F   | ACGTTGGATGAGATGACAGGAAATGGAGCG  | sf004741_CG_CG_R   | ACGTTGGATGCAGTCAATTTGACAGAGCAGG | sf004741_CG_CG_P   | GTTGTTCTAGATGAAGGC            |
| sequenom | SEQ018 | sf004774_AG | sf004774_AG_AG_F   | ACGTTGGATGAACCTGCAGCCTGATCAAAG  | sf004774_AG_AG_R   | ACGTTGGATGTGGCAATGGTATGGCACATC  | sf004774_AG_AG_P   | TTGGGTACGTAGCACAAAGCATCTAGA   |

---

|          |        |             |                    |                                |                    |                                |                     |                             |
|----------|--------|-------------|--------------------|--------------------------------|--------------------|--------------------------------|---------------------|-----------------------------|
| sequenom | SEQ018 | sf005157_CT | sf005157_CT_CT_F   | ACGTTGGATGGAACATCATTGTTGGAGCAG | sf005157_CT_CT_R   | ACGTTGGATGCTTTTAAAATGGGCCTTTGC | sf005157_CT_CT_P    | GATTAGAGAACTCATGAAACA       |
| sequenom | SEQ018 | sf005160_AC | sf005160_AC_CA_F   | ACGTTGGATGCTTGAAGGCTCTTACGTTGG | sf005160_AC_CA_R   | ACGTTGGATGGTTGAGGTCAGAAGTAGAAG | sf005160_AC_CA_Pa   | ATCAGATGGAGTTGAAGACGA       |
| sequenom | SEQ018 | sf006410_AG | sf006410_AG_GA02_F | ACGTTGGATGGCTTCAATTGGCTCCATATC | sf006410_AG_GA02_R | ACGTTGGATGTGTAACTCAAGACCCTCAC  | sf006410_AG_GA02_Pa | AAACCATGTTCTATGATTTCTAATATT |

---
