# Supplementary material for: Coding Gene Single Nucleotide Polymorphism Mapping and Quantitative Trait Loci Detection for Physiological Reproductive Traits in Brook Charr,Salvelinus fontinalis
Source: Oxford University Press journal article supplement (doi:10.1534/g3.111.001867), 2012-03-01
Supplement: 379_tables3.pdf [file 379_tables3.pdf]

**Table S3 Description and annotation of the 281 SNP (single nucleotide-polymorphism) markers used to build the linkage map in the Brook charr, *Salvelinus fontinalis*.**

**Ts: transition; Tv: transversion; C: coding region; NC: non coding region; S: synonymous; NS: non synonymous; LG: linkage group.**

|             |                  | GenInfo          |           |       |      |      |    |  |
|-------------|------------------|------------------|-----------|-------|------|------|----|--|
| SNP Name    | Accession number | Identifiers (GI) | Variation | Ts/Tv | C/NC | S/NS | LG |  |
| 1 sf000002  | BT050259         | GI:209738381     | A/G       | Ts    | NC   | -    | 22 |  |
| 2 sf000017  | XP_691985.3      | GI:189515371     | C/G       | Tv    | C    | -    | 31 |  |
| 3 sf000020  |                  |                  | C/T       | Ts    | C    | NS   | 35 |  |
| 4 sf000021  | BT044685.1       | GI:209148638     | A/C       | Tv    | C    | -    | 14 |  |
| 5 sf000023  |                  |                  | C/T       | Ts    | NC   | -    | -  |  |
| 6 sf000032  |                  |                  | A/G       | Ts    | C    | -    | 15 |  |
| 7 sf000062  |                  |                  | C/G       | Tv    | NC   | -    | -  |  |
| 8 sf000071  |                  |                  | A/C       | Tv    | NC   | -    | 3  |  |
| 9 sf000078  |                  |                  | A/T       | Tv    | NC   | -    | 27 |  |
| 10 sf000086 | XM_001921499.1   | GI:189516301     | C/T       | Ts    | NC   | -    | -  |  |
| 11 sf000088 | XP_002609992.1   | GI:260830085     | A/G       | Ts    | NC   | -    | -  |  |
| 12 sf000119 |                  |                  | A/G       | Ts    | NC   | -    | 12 |  |
| 13 sf000124 |                  |                  | A/G       | Ts    | C    | -    | 17 |  |
| 14 sf000132 |                  |                  | A/G       | Ts    | NC   | -    | 13 |  |
| 15 sf000137 | NM_200955        | GI:41055673      | A/T       | Tv    | C    | NS   | -  |  |
| 16 sf000139 |                  |                  | G/T       | Tv    | NC   | -    | 4  |  |
| 17 sf000151 |                  |                  | A/T       | Tv    | NC   | -    | 15 |  |
| 18 sf000157 | NP_775368        | GI:27545272      | A/C       | Tv    | C    | NS   | 25 |  |
| 19 sf000175 | XP_001054847     | GI:109498064     | G/T       | Tv    | NC   | -    | -  |  |
| 20 sf000178 |                  |                  | A/G       | Ts    | C    | -    | 19 |  |
| 21 sf000179 |                  |                  | C/T       | Ts    | NC   | -    | 3  |  |
| 22 sf000191 |                  |                  | C/G       | Tv    | NC   | -    | -  |  |

|    |          |                |              |     |    |    |    |    |
|----|----------|----------------|--------------|-----|----|----|----|----|
| 23 | sf000209 |                |              | C/T | Ts | NC | -  | -  |
| 24 | sf000228 |                |              | A/T | Tv | NC | -  | -  |
| 25 | sf000310 |                |              | A/T | Tv | NC | -  | 10 |
| 26 | sf000324 |                |              | A/C | Tv | NC | -  | 8  |
| 27 | sf000327 |                |              | A/G | Ts | NC | -  | -  |
| 28 | sf000364 |                |              | A/G | Ts | C  | NS | 31 |
| 29 | sf000364 |                |              | G/T | Tv | C  | NS | 31 |
| 30 | sf000382 |                |              | A/G | Ts | NC | -  | -  |
| 31 | sf000390 | BT057320       | GI:221221062 | C/T | Ts | NC | -  | -  |
| 32 | sf000392 | CAAE01015004.1 | GI:47226310  | C/T | Ts | C  | -  | 23 |
| 33 | sf000397 |                |              | C/G | Tv | NC | -  | 20 |
| 34 | sf000428 |                |              | A/T | Tv | NC | -  | 3  |
| 35 | sf000505 |                |              | C/T | Ts | C  | -  | 1  |
| 36 | sf000508 |                |              | C/T | Ts | NC | -  | 4  |
| 37 | sf000518 |                |              | G/T | Tv | NC | -  | -  |
| 38 | sf000554 | BT059059.1     | GI:223648027 | C/T | Ts | C  | NS | 2  |
| 39 | sf000559 | XM_001502487   | GI:149728067 | A/G | Ts | NC | -  | -  |
| 40 | sf000583 | EF467299.1     | GI:154795566 | C/T | Ts | NC | -  | 8  |
| 41 | sf000584 | EU025714       | GI:158702319 | A/G | Ts | C  | -  | 10 |
| 42 | sf000612 | NM_001020538   | GI:66472671  | A/T | Tv | NC | -  | 37 |
| 43 | sf000633 |                |              | G/T | Tv | C  | -  | -  |
| 44 | sf000656 |                |              | A/G | Ts | NC | -  | 20 |
| 45 | sf000657 |                |              | C/T | Ts | NC | -  | 2  |
| 46 | sf000679 | BT060419       | GI:223673194 | C/T | Ts | NC | -  | -  |
| 47 | sf000684 | GU129140       | GI:213512874 | C/T | Ts | C  | -  | 34 |
| 48 | sf000706 | NP_001117688   | GI:185135493 | A/G | Ts | NC | -  | 6  |
| 49 | sf000717 |                |              | C/T | Ts | NC | -  | 18 |
| 50 | sf000719 |                |              | A/T | Tv | NC | -  | 16 |

|    |          |              |              |     |    |    |    |    |
|----|----------|--------------|--------------|-----|----|----|----|----|
| 51 | sf000744 |              |              | A/T | Tv | C  | NS | 5  |
| 52 | sf000747 |              |              | C/T | Ts | NC | -  | -  |
| 53 | sf000754 |              |              | A/C | Tv | NC | -  | 8  |
| 54 | sf000810 | BT045174     | GI:209154407 | C/T | Ts | NC | -  | 2  |
| 55 | sf000854 |              |              | G/T | Tv | NC | -  | -  |
| 56 | sf000878 |              |              | C/T | Ts | NC | -  | -  |
| 57 | sf000891 |              |              | A/C | Tv | C  | NS | 6  |
| 58 | sf000899 | EU025705     | GI:158702261 | C/T | Ts | NC | -  | 12 |
| 59 | sf000905 |              |              | A/T | Tv | C  | -  | 31 |
| 60 | sf000961 |              |              | C/T | Ts | NC | -  | 5  |
| 61 | sf000966 |              |              | A/G | Ts | NC | -  | 13 |
| 62 | sf000970 |              |              | A/G | Ts | C  | -  | 9  |
| 63 | sf000978 |              |              | A/G | Ts | NC | -  | 1  |
| 64 | sf000991 |              |              | A/T | Tv | C  | -  | -  |
| 65 | sf001069 |              |              | G/T | Tv | NC | -  | -  |
| 66 | sf001086 | NM_001141083 | GI:213513628 | C/T | Ts | NC | -  | -  |
| 67 | sf001105 |              |              | A/G | Ts | NC | -  | 17 |
| 68 | sf001164 |              |              | C/T | Ts | NC | -  | -  |
| 69 | sf001181 |              |              | A/G | Ts | C  | -  | -  |
| 70 | sf001184 | CR391965     | GI:167908776 | C/T | Ts | NC | -  | 1  |
| 71 | sf001196 |              |              | A/G | Ts | NC | -  | -  |
| 72 | sf001284 |              |              | G/T | Tv | NC | -  | 33 |
| 73 | sf001287 |              |              | C/T | Ts | C  | -  | -  |
| 74 | sf001288 |              |              | C/T | Ts | C  | NS | 2  |
| 75 | sf001353 |              |              | G/T | Tv | C  | -  | 5  |
| 76 | sf001359 | GQ505860     | GI:260182183 | A/G | Ts | NC | -  | -  |
| 77 | sf001394 |              |              | A/T | Tv | NC | -  | 6  |
| 78 | sf001437 |              |              | A/G | Ts | NC | -  | -  |

|     |          |              |              |     |    |    |    |    |
|-----|----------|--------------|--------------|-----|----|----|----|----|
| 79  | sf001546 |              |              | A/C | Tv | C  | NS | 28 |
| 80  | sf001601 |              |              | C/T | Ts | NC | -  | 8  |
| 81  | sf001644 |              |              | G/T | Tv | C  | -  | 2  |
| 82  | sf001661 |              |              | G/T | Tv | C  | -  | -  |
| 83  | sf001667 |              |              | A/G | Ts | C  | NS | 17 |
| 84  | sf001686 |              |              | A/G | Ts | NC | -  | -  |
| 85  | sf001692 |              |              | C/T | Ts | NC | -  | 12 |
| 86  | sf001740 |              |              | A/G | Ts | NC | -  | 7  |
| 87  | sf001770 |              |              | A/G | Ts | NC | -  | 21 |
| 88  | sf001812 | AC203446     | GI:163955243 | A/G | Ts | NC | -  | 9  |
| 89  | sf001831 |              |              | A/C | Tv | NC | -  | 40 |
| 90  | sf001846 |              |              | A/G | Ts | NC | -  | 30 |
| 91  | sf001880 | EF467300     | GI:154795567 | C/T | Ts | NC | -  | -  |
| 92  | sf001996 | DQ246664     | GI:80971723  | A/G | Ts | NC | -  | 28 |
| 93  | sf002018 |              |              | A/C | Tv | NC | -  | 25 |
| 94  | sf002024 |              |              | A/G | Ts | NC | -  | 3  |
| 95  | sf002033 | AJ311906     | GI:20873289  | A/T | Tv | C  | -  | 2  |
| 96  | sf002055 |              |              | A/G | Ts | C  | NS | 31 |
| 97  | sf002131 |              |              | A/G | Ts | C  | -  | 1  |
| 98  | sf002145 | XM_683887    | GI:292622326 | C/G | Tv | C  | NS | 31 |
| 99  | sf002155 |              |              | A/G | Ts | NC | -  | -  |
| 100 | sf002175 |              |              | C/T | Ts | NC | -  | 34 |
| 101 | sf002203 |              |              | A/G | Ts | C  | -  | 7  |
| 102 | sf002250 | XM_001920907 | GI:189520811 | A/C | Tv | C  | -  | 28 |
| 103 | sf002333 |              |              | A/G | Ts | NC | -  | -  |
| 104 | sf002353 | NM_001141843 | GI:213513502 | C/T | Ts | NC | -  | 20 |
| 105 | sf002439 |              |              | C/T | Ts | NC | -  | 31 |
| 106 | sf002633 | BT072804     | GI:224587929 | A/C | Tv | C  | -  | -  |

|     |          |              |              |     |    |    |    |    |
|-----|----------|--------------|--------------|-----|----|----|----|----|
| 107 | sf002640 |              |              | A/G | Ts | NC | -  | 21 |
| 109 | sf002721 |              |              | A/G | Ts | C  | -  | 32 |
| 110 | sf002948 | CAAE01015039 | GI:47222189  | G/T | Tv | C  | S  | 7  |
| 111 | sf003018 |              |              | A/G | Ts | NC | -  | 26 |
| 112 | sf003063 |              |              | A/C | Tv | NC | -  | 1  |
| 113 | sf003076 | EU025709     | GI:158702304 | A/G | Ts | NC | -  | 23 |
| 114 | sf003084 |              |              | A/G | Ts | C  | -  | 4  |
| 115 | sf003092 |              |              | C/T | Ts | C  | -  | 9  |
| 116 | sf003105 |              |              | C/T | Ts | NC | -  | 3  |
| 117 | sf003118 |              |              | A/G | Ts | NC | -  | 6  |
| 118 | sf003141 | BT056462     | GI:221219345 | A/T | Tv | NC | -  | 11 |
| 119 | sf003142 | CU062627     | GI:150171078 | A/G | Ts | NC | -  | -  |
| 120 | sf003197 |              |              | A/G | Ts | NC | -  | -  |
| 121 | sf003208 |              |              | C/T | Ts | NC | -  | -  |
| 122 | sf003334 |              |              | A/G | Ts | NC | -  | 24 |
| 123 | sf003382 |              |              | A/G | Ts | C  | NS | 14 |
| 124 | sf003407 |              |              | C/T | Ts | NC | -  | 10 |
| 125 | sf003442 |              |              | A/G | Ts | C  | -  | 24 |
| 126 | sf003455 |              |              | A/G | Ts | NC | -  | 11 |
| 127 | sf003500 | BT049606.1   | GI:209737075 | C/T | Ts | NC | -  | 1  |
| 128 | sf003520 |              |              | A/G | Ts | C  | S  | 2  |
| 129 | sf003538 | AL840630     | GI:41322894  | G/T | Tv | NC | -  | 9  |
| 130 | sf003560 |              |              | C/T | Ts | C  | S  | -  |
| 131 | sf003589 |              |              | C/T | Ts | C  | -  | -  |
| 132 | sf003595 |              |              | A/T | Tv | NC | -  | -  |
| 133 | sf003601 |              |              | C/T | Ts | NC | -  | -  |
| 134 | sf003610 |              |              | A/T | Tv | C  | -  | 1  |
| 135 | sf003611 |              |              | A/C | Tv | NC | -  | -  |

|     |          |              |              |     |    |    |    |    |
|-----|----------|--------------|--------------|-----|----|----|----|----|
| 136 | sf003614 | CAAE01014563 | GI:47223303  | G/T | Tv | NC | -  | 8  |
| 137 | sf003621 | BT059052     | GI:223648013 | C/T | Ts | NC | -  | -  |
| 138 | sf003633 |              |              | A/G | Ts | C  | S  | 21 |
| 139 | sf003639 | EF427381     | GI:148362130 | C/T | Ts | NC | -  | 30 |
| 140 | sf003647 |              |              | C/G | Tv | NC | -  | 40 |
| 141 | sf003697 |              |              | A/C | Tv | NC | -  | 37 |
| 142 | sf003698 |              |              | G/T | Tv | C  | -  | -  |
| 143 | sf003700 |              |              | C/T | Ts | NC | -  | 9  |
| 144 | sf003713 | XM_686639.3  | GI:189530935 | A/T | Tv | NC | -  | 25 |
| 145 | sf003715 | EU816603     | GI:209962458 | C/T | Ts | NC | -  | 11 |
| 146 | sf003724 |              |              | C/T | Ts | NC | -  | -  |
| 147 | sf003728 |              |              | C/T | Ts | C  | -  | 31 |
| 148 | sf003755 |              |              | G/T | Tv | NC | -  | 7  |
| 149 | sf003788 | XM_002660927 | GI:292611089 | G/T | Tv | NC | -  | -  |
| 150 | sf003813 | EU621898     | GI:187936476 | A/G | Ts | NC | -  | 8  |
| 151 | sf003836 |              |              | A/T | Tv | NC | -  | 15 |
| 152 | sf003897 |              |              | A/G | Ts | NC | -  | 10 |
| 153 | sf003899 |              |              | C/T | Ts | NC | -  | 11 |
| 154 | sf003919 | GQ505860     | GI:260182183 | C/T | Ts | NC | -  | 1  |
| 155 | sf003977 | EU481821     | GI:171474994 | C/G | Tv | NC | -  | -  |
| 156 | sf003994 |              |              | G/T | Tv | NC | -  | -  |
| 157 | sf004008 |              |              | A/G | Ts | C  | NS | -  |
| 158 | sf004013 | EU221180     | GI:159033051 | A/C | Tv | C  | NS | 38 |
| 159 | sf004016 |              |              | A/G | Ts | NC | -  | 2  |
| 160 | sf004030 | XM_689729    | GI:189528958 | A/T | Tv | NC | -  | 19 |
| 161 | sf004038 | NM_001165151 | GI:259089170 | A/G | Ts | NC | -  | 34 |
| 162 | sf004055 | XP_001921123 | GI:189530039 | A/T | Tv | C  | NS | 22 |
| 163 | sf004056 | EF467297     | GI:154795564 | C/T | Ts | C  | NS | -  |

|     |          |              |              |     |    |    |    |    |
|-----|----------|--------------|--------------|-----|----|----|----|----|
| 164 | sf004064 |              |              | A/C | Tv | NC | -  | 28 |
| 165 | sf004070 |              |              | A/G | Ts | NC | -  | 24 |
| 166 | sf004090 |              |              | C/G | Tv | C  | NS | -  |
| 167 | sf004099 |              |              | A/T | Tv | NC | -  | -  |
| 168 | sf004112 |              |              | A/G | Ts | NC | -  | -  |
| 169 | sf004131 | NM_001173900 | GI:291190431 | A/G | Ts | NC | -  | 40 |
| 170 | sf004149 | FJ969490     | GI:262189352 | C/G | Tv | NC | -  | 6  |
| 171 | sf004155 | EU025709     | GI:158702304 | G/T | Tv | NC | -  | -  |
| 172 | sf004192 |              |              | A/G | Ts | C  | -  | -  |
| 173 | sf004209 |              |              | A/T | Tv | NC | -  | -  |
| 174 | sf004211 |              |              | G/T | Tv | NC | -  | 3  |
| 175 | sf004214 |              |              | A/G | Ts | NC | -  | 6  |
| 176 | sf004240 | EU621900     | GI:187936480 | A/G | Ts | NC | -  | 6  |
| 177 | sf004252 | NM_001140784 | GI:213515209 | G/T | Tv | NC | -  | 5  |
| 178 | sf004254 | BT071904     | GI:224613219 | C/T | Ts | C  | -  | 13 |
| 179 | sf004257 | AB294121     | GI:149773365 | A/G | Ts | NC | -  | 3  |
| 180 | sf004260 |              |              | C/T | Ts | C  | -  | -  |
| 181 | sf004288 |              |              | A/G | Ts | C  | -  | -  |
| 182 | sf004299 | XM_001922165 | GI:189531595 | C/T | Ts | NC | -  | 10 |
| 183 | sf004319 | BT058994     | GI:223647897 | G/T | Tv | C  | -  | 23 |
| 184 | sf004353 | NM_001124574 | GI:185135642 | A/G | Ts | C  | S  | 40 |
| 185 | sf004357 | EU025708     | GI:158702285 | C/T | Ts | C  | NS | 4  |
| 186 | sf004373 |              |              | A/G | Ts | C  | -  | 5  |
| 187 | sf004379 |              |              | C/T | Ts | NC | -  | 15 |
| 188 | sf004387 |              |              | C/T | Ts | C  | -  | -  |
| 189 | sf004416 | GU129140     | GI:290760588 | A/C | Tv | NC | -  | 31 |
| 190 | sf004423 |              |              | A/G | Ts | C  | -  | -  |
| 191 | sf004426 |              |              | C/T | Ts | NC | -  | 24 |

|     |          |              |              |     |    |    |    |    |
|-----|----------|--------------|--------------|-----|----|----|----|----|
| 192 | sf004438 | BT045405     | GI:209154869 | C/T | Ts | C  | NS | 31 |
| 193 | sf004475 | EU621899     | GI:187936478 | C/T | Ts | C  | S  | 25 |
| 194 | sf004521 |              |              | C/G | Tv | NC | -  | 1  |
| 195 | sf004529 |              |              | A/T | Tv | NC | -  | 38 |
| 196 | sf004541 |              |              | A/C | Tv | NC | -  | 2  |
| 197 | sf004545 | EF427379     | GI:148362119 | A/C | Tv | NC | -  | -  |
| 198 | sf004560 |              |              | G/T | Tv | NC | -  | 3  |
| 199 | sf004562 |              |              | A/C | Tv | NC | -  | 7  |
| 200 | sf004583 | NM_001013274 | GI:61651703  | A/C | Tv | NC | -  | -  |
| 201 | sf004602 | XM_001922165 | GI:189531595 | A/G | Ts | NC | -  | -  |
| 202 | sf004614 |              |              | A/G | Ts | C  | -  | 13 |
| 203 | sf004624 | EU816603     | GI:209962458 | C/T | Ts | NC | -  | 10 |
| 204 | sf004632 | EU025707     | GI:158702273 | C/T | Ts | NC | -  | -  |
| 205 | sf004642 |              |              | A/G | Ts | NC | -  | 6  |
| 206 | sf004651 |              |              | A/G | Ts | C  | NS | 6  |
| 207 | sf004656 |              |              | A/C | Tv | NC | -  | 21 |
| 208 | sf004668 | FJ969489     | GI:262189345 | A/C | Tv | C  | -  | 38 |
| 209 | sf004684 |              |              | A/T | Tv | NC | -  | -  |
| 210 | sf004685 |              |              | A/G | Ts | NC | -  | 39 |
| 211 | sf004685 |              |              | A/G | Ts | C  | NS | 39 |
| 212 | sf004685 |              |              | C/G | Tv | C  | NS | -  |
| 213 | sf004714 | EU025714     | GI:158702319 | C/T | Ts | C  | -  | 27 |
| 214 | sf004715 |              |              | C/T | Ts | C  | -  | 10 |
| 215 | sf004732 | AB258536     | GI:118596560 | C/T | Ts | NC | -  | 29 |
| 216 | sf004741 |              |              | C/G | Tv | NC | -  | 31 |
| 217 | sf004762 |              |              | C/T | Ts | NC | -  | 18 |
| 218 | sf004765 |              |              | C/T | Ts | C  | NS | 4  |
| 219 | sf004774 |              |              | A/G | Ts | C  | -  | 3  |



|     |          |              |              |     |    |    |    |    |
|-----|----------|--------------|--------------|-----|----|----|----|----|
| 220 | sf004795 | BT057087     | GI:221220595 | C/T | Ts | NC | -  | 10 |
| 221 | sf004811 | EU025709     | GI:158702304 | A/T | Tv | C  | NS | 15 |
| 222 | sf004817 | EU025714     | GI:158702319 | C/G | Tv | NC | -  | -  |
| 223 | sf004818 | EU481821     | GI:171474994 | A/C | Tv | NC | -  | 2  |
| 224 | sf004828 | AJ716203     | GI:52673235  | A/T | Tv | NC | -  | -  |
| 225 | sf004839 |              |              | C/T | Ts | C  | -  | 39 |
| 226 | sf004848 | BT058155.1   | GI:223646219 | A/T | Tv | NC | -  | 17 |
| 227 | sf004870 |              |              | A/G | Ts | NC | -  | 7  |
| 228 | sf004890 | FJ969489     | GI:262189345 | A/C | Tv | NC | -  | -  |
| 229 | sf004897 |              |              | A/T | Tv | NC | -  | -  |
| 230 | sf004904 |              |              | C/G | Tv | NC | -  | -  |
| 231 | sf004909 | EU481821     | GI:171474994 | A/T | Tv | C  | NS | 13 |
| 232 | sf004913 | BT059404     | GI:223648717 | A/C | Tv | NC | -  | 4  |
| 233 | sf004917 | BT072749     | GI:224587877 | C/T | Ts | NC | -  | 12 |
| 234 | sf004938 | EU025708     | GI:158702285 | C/T | Ts | NC | -  | 9  |
| 235 | sf004975 | EU221176     | GI:159147122 | C/T | Ts | NC | -  | 31 |
| 236 | sf004977 | EU025707     | GI:158702273 | C/T | Ts | NC | -  | -  |
| 237 | sf004984 | NM_001140391 | GI:213511551 | A/G | Ts | C  | NS | 5  |
| 238 | sf005000 | DQ246664     | GI:80971723  | C/T | Ts | C  | NS | -  |
| 239 | sf005052 | BT058930     | GI:223647769 | A/G | Ts | C  | -  | -  |
| 240 | sf005054 | BT059612     | GI:223649133 | A/G | Ts | NC | -  | 3  |
| 241 | sf005079 |              |              | A/C | Tv | NC | -  | -  |
| 242 | sf005104 | EU025714     | GI:158702319 | A/C | Tv | NC | -  | -  |
| 243 | sf005138 | NM_001145584 | GI:224496041 | A/C | Tv | NC | -  | -  |
| 244 | sf005160 |              |              | A/C | Tv | C  | -  | 31 |
| 245 | sf005168 | BX537340     | GI:51592271  | A/C | Tv | C  | -  | 2  |
| 246 | sf005182 | SSSAT48S1    | GI:501083    | A/G | Ts | NC | -  | -  |
| 247 | sf005182 | SSSAT48S1    | GI:501083    | A/G | Ts | NC | -  | -  |

|     |          |              |              |     |    |    |    |    |
|-----|----------|--------------|--------------|-----|----|----|----|----|
| 248 | sf005186 |              |              | C/T | Ts | NC | -  | 39 |
| 249 | sf005248 | EU481821     | GI:171474994 | C/T | Ts | NC | -  | 9  |
| 250 | sf005258 | EU221180     | GI:159033051 | A/C | Tv | NC | -  | -  |
| 251 | sf005272 | EF467298     | GI:154795565 | C/G | Tv | NC | -  | -  |
| 252 | sf005286 |              |              | C/T | Ts | NC | -  | -  |
| 253 | sf005311 | GQ505859     | GI:260182171 | C/G | Tv | NC | -  | -  |
| 254 | sf005344 | GU129140     | GI:290760588 | A/T | Tv | C  | NS | 32 |
| 255 | sf005399 | AM748538     | GI:242098051 | A/T | Tv | C  | NS | -  |
| 256 | sf005409 | CR847272     | GI:55058237  | A/C | Tv | C  | NS | 8  |
| 257 | sf005410 | FJ969489     | GI:262189345 | A/C | Tv | NC | -  | -  |
| 258 | sf005420 |              |              | A/G | Ts | NC | -  | 38 |
| 259 | sf005440 |              |              | C/T | Ts | NC | -  | 21 |
| 260 | sf005440 |              |              | A/G | Ts | C  | S  | -  |
| 261 | sf005443 |              |              | C/G | Tv | C  | -  | 37 |
| 262 | sf005459 |              |              | A/C | Tv | NC | -  | 1  |
| 263 | sf005501 | BT072704     | GI:224587835 | A/G | Ts | NC | -  | 9  |
| 264 | sf005540 | EU816603     | GI:209962458 | C/T | Ts | C  | -  | 19 |
| 265 | sf005590 |              |              | C/T | Ts | C  | NS | 35 |
| 266 | sf005652 |              |              | A/G | Ts | NC | -  | 8  |
| 267 | sf005654 | NM_001165392 | GI:259155245 | C/T | Ts | C  | -  | -  |
| 268 | sf005663 |              |              | A/G | Ts | NC | -  | 1  |
| 269 | sf005695 |              |              | C/T | Ts | C  | -  | -  |
| 270 | sf005769 | NM_001140223 | GI:213511597 | A/G | Ts | NC | -  | 14 |
| 271 | sf005769 | NM_001140223 | GI:213511597 | C/T | Ts | NC | -  | 14 |
| 272 | sf005917 | EU221180     | GI:159033051 | C/T | Ts | NC | -  | -  |
| 273 | sf006000 | EU621898     | GI:187936476 | C/T | Ts | C  | -  | 35 |
| 274 | sf006000 | EU621898     | GI:187936476 | A/G | Ts | NC | -  | -  |
| 275 | sf006057 | XM_001919059 | GI:189519277 | A/G | Ts | C  | S  | -  |

|     |          |              |              |     |    |    |    |    |
|-----|----------|--------------|--------------|-----|----|----|----|----|
| 276 | sf006073 | BX927363     | GI:112183280 | A/G | Ts | C  | NS | 39 |
| 277 | sf006078 | BT059612     | GI:223649133 | A/T | Tv | NC | -  | -  |
| 278 | sf006081 | FJ969488     | GI:262189341 | G/T | Tv | NC | -  | 33 |
| 279 | sf006102 | GU129139     | GI:290760560 | A/C | Tv | C  | NS | -  |
| 280 | sf006197 | NM_001140134 | GI:213511349 | A/T | Tv | NC | -  | -  |
| 281 | sf006410 | XM_002663717 | GI:292618742 | A/G | Ts | NC | -  | 9  |

---
