# Supplementary material for: Coding Gene Single Nucleotide Polymorphism Mapping and Quantitative Trait Loci Detection for Physiological Reproductive Traits in Brook Charr,Salvelinus fontinalis
Source: Oxford University Press journal article supplement (doi:10.1534/g3.111.001867), 2012-03-01
Supplement: 379_tables5.pdf [file 379_tables5.pdf]

**Table S5** Description of the consensus and sex-specific linkage maps build using Crimap in brook charr, *Salvelinus fontinalis*. SNP: single nucleotide polymorphism; Msats: microsatellites

| Map | Consensus     |                               |                   | Female                      |                               |                   | Male                        |                               |                   |
|-----|---------------|-------------------------------|-------------------|-----------------------------|-------------------------------|-------------------|-----------------------------|-------------------------------|-------------------|
|     | Linkage group | Number of markers (SNP/Msats) | Total length (cM) | Average marker spacing (cM) | Number of markers (SNP/Msats) | Total length (cM) | Average marker spacing (cM) | Number of markers (SNP/Msats) | Total length (cM) |
| 1   | 16 (11/5)     | 132.2                         | 8.26              | 16 (11/5)                   | 187                           | 11.6              | 16 (11/5)                   | 77.8                          | 4.23              |
| 2   | 16 (11/5)     | 130.2                         | 8.14              | 16 (11/5)                   | 169.3                         | 10.5              | 16 (11/5)                   | 65.4                          | 4.08              |
| 3   | 15 (10/5)     | 95.7                          | 6.38              | 15 (10/5)                   | 101.1                         | 6.74              | 15 (10/5)                   | 33.3                          | 2.22              |
| 4   | 8 (6/2)       | 73.2                          | 9.15              | 8 (6/2)                     | 65.4                          | 8.2               | 8 (6/2)                     | 24.1                          | 3.01              |
| 5   | 11 (6/5)      | 95.2                          | 8.65              | 11 (6/5)                    | 70.3                          | 6.39              | 11 (6/5)                    | 28.3                          | 2.57              |
| 6   | 11 (9/2)      | 77.5                          | 7.04              | 11 (9/2)                    | 67.8                          | 6.2               | 11 (9/2)                    | 25.9                          | 2.35              |
| 7   | 9 (6/3)       | 46.6                          | 5.17              | 9 (6/3)                     | 34.5                          | 3.8               | 9 (6/3)                     | 12.3                          | 1.36              |
| 8   | 11 (8/3)      | 81.2                          | 7.38              | 10 (7/3)                    | 129.3                         | 12.9              | 10 (7/3)                    | 44.2                          | 4.42              |
| 9   | 10 (9/1)      | 82.3                          | 8.23              | 10 (9/1)                    | 45.4                          | 4.5               | 10 (9/1)                    | 26.5                          | 2.65              |
| 10  | 9 (8/1)       | 63.6                          | 7.06              | 9 (8/1)                     | 43.6                          | 4.8               | 8 (7/1)                     | 17.8                          | 2.22              |
| 11  | 8 (4/4)       | 70.1                          | 8.76              | 8 (4/4)                     | 64.4                          | 8.1               | 8 (4/4)                     | 25.9                          | 3.23              |
| 12  | 6 (4/2)       | 78.4                          | 13.06             | 6 (4/2)                     | 58.1                          | 9.7               | 6 (4/2)                     | 24.8                          | 4.13              |
| 13  | 7 (5/2)       | 74                            | 10.57             | 7 (5/2)                     | 67.9                          | 9.7               | 7 (5/2)                     | 26.9                          | 3.84              |
| 14  | 6 (4/2)       | 68.5                          | 11.41             | 6 (4/2)                     | 52.1                          | 8.7               | 6 (4/2)                     | 21.3                          | 3.55              |
| 15  | 6 (5/1)       | 52.6                          | 8.76              | 6 (5/1)                     | 42.6                          | 7.1               | 6 (5/1)                     | 17.4                          | 2.9               |
| 16  | 4 (1/3)       | 42.8                          | 10.7              | 4 (1/3)                     | 29.9                          | 7.4               | 4 (1/3)                     | 11.9                          | 2.97              |
| 17  | 6 (4/2)       | 30.3                          | 5.05              | 6 (4/2)                     | 27.5                          | 4.6               | 6 (4/2)                     | 21.3                          | 1.83              |
| 18  | 5 (2/3)       | 24.9                          | 4.98              | 5 (2/3)                     | 34.5                          | 6.9               | 5 (2/3)                     | 6.9                           | 1.38              |
| 19  | 4 (3/1)       | 61.1                          | 15.27             | 4 (3/1)                     | 66.8                          | 16.7              | 4 (3/1)                     | 22.4                          | 5.6               |
| 20  | 5 (3/2)       | 67.2                          | 13.44             | 5 (3/2)                     | 71.2                          | 14.2              | 5 (3/2)                     | 21.9                          | 4.38              |
| 21  | 6 (5/1)       | 60.7                          | 10.11             | 6 (5/1)                     | 61.2                          | 10.2              | 6 (5/1)                     | 20.4                          | 3.4               |

|              |            |               |             |            |               |             |            |              |            |
|--------------|------------|---------------|-------------|------------|---------------|-------------|------------|--------------|------------|
| 22           | 5 (2/3)    | 45.8          | 9.16        | 5 (2/3)    | 77.8          | 15.6        | 5 (2/3)    | 27.1         | 5.42       |
| 23           | 4 (3/1)    | 29.2          | 7.3         | 4 (3/1)    | 33.9          | 8.5         | 4 (3/1)    | 11.4         | 2.85       |
| 24           | 5 (4/1)    | 49.3          | 9.86        | 5 (4/1)    | 66.1          | 13.2        | 5 (4/1)    | 20.3         | 4.06       |
| 25           | 4 (4/0)    | 29.8          | 7.45        | 4 (4/0)    | 35.6          | 8.9         | 4 (4/0)    | 11.2         | 2.8        |
| 26           | 3 (2/1)    | 11.5          | 3.83        | 3 (2/1)    | 34.1          | 11.4        | 3 (2/1)    | 4.5          | 1.5        |
| 27           | 3 (2/1)    | 27.8          | 9.26        | 3 (2/1)    | 43.5          | 14.5        | 3 (2/1)    | 11.5         | 3.83       |
| 28           | 4 (4/0)    | 3.9           | 0.975       | 4 (4/0)    | 23.1          | 5.7         | 4 (4/0)    | 2.8          | 0.7        |
| 29           | 2 (1/1)    | 42.3          | 21.15       | 2 (1/1)    | 44.4          | 22.2        | 2 (1/1)    | 24.5         | 12.25      |
| 30           | 3 (2/1)    | 63.9          | 21.3        | 3 (2/1)    | 22.4          | 7.5         | 3 (2/1)    | 32.3         | 10.76      |
| 31           | 17 (13/4)  | 72.3          | 4.25        | 16 (12/4)  | 121.2         | 7.5         | 15 (11/4)  | 41.9         | 2.79       |
| 32           | 3 (2/1)    | 59.1          | 19.7        | 3 (2/1)    | 78.5          | 26.2        | 3 (2/1)    | 32.5         | 10.83      |
| 33           | 2 (2/0)    | 1.4           | 0.7         | 2 (2/0)    | 3.6           | 1.8         | 2 (2/0)    | 1.1          | 0.55       |
| 34           | 3 (3/0)    | 41.8          | 13.93       | 3 (3/0)    | 66.1          | 22.1        | 3 (3/0)    | 24.5         | 8.16       |
| 35           | 3 (3/0)    | 2.4           | 0.8         | 3 (3/0)    | 11.5          | 3.8         | 3 (3/0)    | 3.8          | 1.26       |
| 36           | 3 (2/1)    | 29.1          | 9.7         | 2 (1/1)    | 48.7          | 24.3        | 3 (2/1)    | 20.3         | 6.76       |
| 37           | 3 (3/0)    | 6.5           | 2.16        | 3 (3/0)    | 12.7          | 4.2         | 3 (3/0)    | 4.5          | 1.5        |
| 38           | 11 (5/6)   | 12.9          | 1.17        | 11 (5/6)   | 24.1          | 2.2         | 10 (4/6)   | 5.9          | 0.59       |
| 39           | 5 (5/0)    | 4.5           | 0.9         | 5 (5/0)    | 5.2           | 1.1         | 5 (5/0)    | 2.1          | 0.42       |
| 40           | 4 (4/0)    | 5.6           | 1.4         | 4 (4/0)    | 5.9           | 1.4         | 4 (4/0)    | 2.4          | 0.6        |
| <b>Total</b> | <b>266</b> | <b>2047.4</b> | <b>8.31</b> | <b>263</b> | <b>2248.3</b> | <b>9.53</b> | <b>261</b> | <b>861.3</b> | <b>3.6</b> |
