# Supplementary material for: Coding Gene Single Nucleotide Polymorphism Mapping and Quantitative Trait Loci Detection for Physiological Reproductive Traits in Brook Charr, Salvelinus fontinalis
Source: G3 (Bethesda). 2012 Mar 1;2(3):379–92. doi: 10.1534/g3.111.001867 (PMC3291508; doi:10.1534/g3.111.001867)
Supplement: Supporting Information [file supp_2.3.379_FileS2.xlsx]

## Sheet: Genotyping_data
Individuals	sf001184_01CT	sf005459_AC	OGO-4UW	sf003994_GT	sf000978_02CT	sf003610_01AT	OMM-1195	sf005663_CT	D100	CA-345149	sf002131_AG	sf003063_01AC	sf004521_CG	SAL-9UoGiii	sf000505_CT	sf003500_02CT	OMI-30TUFii	sf004541_AC	sf000657_01CT	sf000554_CT	sf000810_03CT	sf004818_06CT	sf003520_AG	sf005168_AC	sf002033_01AG	OMY-RGT2TUFii	sf004016_01AT	OMM-1197i	BX-318599	OMM-1197ii	sf001288_CT	sf001644_01AG	sf002024_02AC	sf004560_GT	OMM5008	sf004774_AG	sf000179_01AC	sf004211_GT	D75	OMM-5007	sf000071_02CT	sf003105_01CT	sf000428_01AT	sfo262	BX-311224	sf004257_02CG	sf005054_02AC	sf004765_01CG	OMM-1220
	1	1	1	1	1	1	1	1	1	1	1	1	1	1	1	1	2	2	2	2	2	2	2	2	2	2	2	2	2	2	2	2	3	3	3	3	3	3	3	3	3	3	3	3	3	3	3	4	4
	0.000	4.570	36.766	53.258	55.887	68.507	70.547	83.011	90.854	91.594	92.107	103.134	118.629	125.706	130.778	132.256	0.000	16.909	26.750	40.090	40.184	40.184	62.669	64.218	72.215	78.199	87.518	97.857	112.425	128.232	130.231	130.231	0.000	8.059	10.072	30.924	31.636	34.666	38.512	44.814	49.174	69.648	70.649	74.236	95.775	95.775	95.775	0.000	10.757
7	AA	AB	4	NA	BB	BB	1	AB	2	2	AB	AB	AB	2	NA	AB	3	AA	BB	AA	BB	AA	AB	AB	AB	AB	AB	4	4	AB	AA	BB	AB	AA	4	AB	AA	NA	4	3	BB	AA	AB	1	BB	AA	BB	BB	BB
8	AB	AB	2	AA	AA	AA	1	AB	4	3	AA	AA	AB	1	AA	AB	2	AB	AB	AB	AB	AB	AA	BB	BB	AA	AB	2	3	BB	AA	BB	BB	BB	2	AA	AB	AA	1	1	AA	AB	AB	4	AB	AA	AB	BB	AB
9	AB	AA	2	AA	AA	AA	1	AA	4	3	AA	AA	AA	NA	AA	AB	3	AA	BB	AA	BB	AA	AB	AB	AB	AB	AB	4	4	AB	AA	BB	AB	AB	1	AB	BB	AB	2	1	AB	AB	AB	4	AB	AA	AB	AA	AA
10	AB	AB	2	AA	AA	AA	1	AA	4	3	AA	AA	AA	1	AA	AB	2	AB	AB	AB	AB	AB	AA	BB	BB	AA	AB	4	3	AB	AA	BB	AA	AA	2	AB	AB	NA	1	1	AB	AB	AB	4	AB	AB	BB	AB	BB
11	AB	AB	NA	AB	AB	AB	4	AA	1	1	AA	AB	AA	1	AA	AB	4	AA	BB	AA	BB	AA	BB	AA	AB	AB	AA	3	NA	AA	AA	BB	AA	AB	NA	AB	AB	AB	3	3	BB	AA	AB	2	BB	AA	AB	AB	AB
12	AA	AA	1	BB	BB	BB	4	AA	1	1	AB	AB	AA	2	AA	AA	4	AA	AB	AA	BB	AA	AB	AB	AB	AB	AB	4	NA	BB	AA	BB	BB	AB	NA	AA	BB	AB	2	1	AA	AB	AB	4	AB	AB	BB	AA	AB
13	AB	AA	4	BB	AB	AB	1	AA	2	2	AA	AB	AB	2	AB	AA	3	AA	BB	AA	BB	AA	AB	AB	AB	AB	AA	4	NA	BB	AA	BB	AB	AB	2	AB	AA	AB	4	1	AB	AA	BB	1	AB	AA	AB	AB	AB
14	AB	AA	4	AA	AA	AA	1	AB	3	4	AA	BB	AB	2	BB	AB	3	AB	BB	AA	BB	AA	AB	AB	AB	AB	AB	4	NA	BB	AA	BB	AB	AB	1	AA	BB	AB	2	1	AA	AB	AB	4	AB	AB	BB	AB	AA
15	AB	AB	2	AA	AA	AA	1	AB	3	4	AA	BB	AB	2	BB	AB	4	AB	AB	AA	BB	AA	BB	AA	AB	AB	AA	1	3	NA	AB	AB	AB	BB	1	AA	BB	AA	2	1	AA	AB	BB	4	AB	AA	AB	AA	AA
16	AB	AB	4	AB	AB	AB	1	AA	1	1	AA	AA	AA	1	AA	AB	1	AB	AB	AB	AB	AB	AA	BB	BB	AB	AB	4	4	AB	AA	BB	AB	BB	2	AA	AB	AA	3	3	AB	AA	BB	2	AB	AA	AB	AB	AB
17	AB	AB	2	AA	AA	AA	1	AB	4	3	AA	AB	AB	1	AA	BB	4	AA	AB	AA	BB	AA	AB	AB	AB	AB	AB	2	4	AB	AA	BB	AB	BB	1	AA	BB	AB	2	2	AA	AB	BB	4	AA	AB	AB	AB	BB
18	AB	AB	2	AA	AA	AA	1	AB	3	4	AA	AB	AB	2	NA	AA	4	AB	AB	AA	BB	AA	AB	AB	AB	AB	AB	4	4	BB	AB	AB	AB	AB	1	AA	BB	AB	2	1	AA	AB	BB	4	AA	AB	BB	BB	BB
19	AA	AA	4	BB	BB	AB	1	AB	2	2	AA	AB	AB	NA	AB	AA	3	AB	BB	AA	BB	AA	AB	AB	AB	AB	AA	4	4	BB	AB	AB	AA	AB	1	AB	AB	AB	1	1	AB	AB	AB	4	AB	AB	AB	AA	AA
20	AA	AA	4	AB	AB	AB	1	AB	3	4	AB	AB	AB	2	BB	BB	3	AA	BB	AA	BB	AA	BB	AA	AB	AB	AA	1	1	NA	AA	BB	AB	BB	4	AA	AB	AA	3	3	AB	AA	BB	2	AB	AA	AB	BB	BB
21	AB	AB	4	AB	AB	AB	1	AB	2	NA	AA	BB	AB	2	BB	AB	1	AB	AB	AB	AB	AB	AB	AB	BB	AB	AA	3	3	AA	AA	BB	AA	AB	4	AB	AA	NA	4	NA	BB	AA	AB	2	AB	AB	BB	BB	BB
22	AB	AB	2	AA	AA	AB	1	AA	4	3	AB	AA	AA	1	AA	AB	1	AB	BB	AB	AB	AB	AA	BB	BB	AA	AB	2	4	AB	AA	BB	AA	AB	4	AB	AB	AB	1	1	AB	AB	AB	4	AB	AA	AB	AA	AA
23	AB	AB	4	AB	AB	AB	1	AB	2	2	AA	AB	AB	2	AB	AB	2	BB	AB	AB	AB	AB	AB	AB	BB	AB	AA	3	3	AA	AB	AB	AB	BB	4	AA	AB	AA	1	1	AA	AB	AB	4	AB	AA	AB	AA	AA
24	AA	AA	4	AB	AB	AB	1	AB	4	3	AB	AB	AA	NA	AA	AB	4	AB	AB	AA	BB	AA	BB	AA	AB	AB	AA	1	1	NA	AB	AB	BB	BB	2	AA	AB	AA	1	1	AA	AB	AB	4	AA	AA	AB	BB	AB
25	AB	AB	NA	AB	AB	AB	4	AB	1	1	AA	AB	AA	NA	AA	AB	1	BB	BB	AB	AB	AB	AB	AB	BB	AB	AA	1	3	NA	AB	AB	AA	AB	4	AB	AB	AB	NA	3	BB	AA	BB	2	BB	AA	AB	NA	AB
26	AA	AB	2	NA	AB	AB	1	AA	4	3	AB	AA	AA	1	AA	AB	1	BB	BB	AB	AB	AB	AB	AB	BB	AA	AA	1	NA	NA	AB	AB	AA	AA	4	AB	AB	NA	3	3	BB	AA	BB	2	AB	AB	BB	BB	AB
27	AB	AB	2	AA	AA	AA	1	AB	3	4	AA	AB	AB	2	BB	BB	1	AB	BB	AB	AB	AB	AA	BB	BB	AB	AB	4	4	BB	AA	BB	AB	BB	1	AA	AB	AA	3	3	AB	AA	BB	2	AB	AA	AB	AA	AB
28	AB	AB	2	AA	AA	AA	1	AA	4	3	AA	AB	AA	1	AA	AA	4	AA	AB	AA	BB	AA	AB	AB	AB	AB	AB	4	4	BB	AA	BB	AB	AB	2	AA	AB	AB	2	1	AA	AB	BB	4	AA	AB	BB	AA	AA
29	AB	AB	4	AB	AB	AB	1	AB	2	2	AA	AB	AB	1	AA	BB	2	BB	AB	AB	AB	AB	AB	AB	BB	AA	AA	3	3	AA	AB	AB	AB	AA	2	AB	AB	NA	1	NA	AB	AB	AB	3	AB	AB	BB	AB	BB
30	AB	AA	4	AB	AA	AA	1	AA	3	4	AA	AB	AB	NA	BB	BB	2	AB	AB	AB	AB	AB	AA	BB	BB	AA	AB	2	4	BB	AA	BB	AB	BB	2	AA	AB	AA	1	1	AA	AB	BB	4	AA	AA	AB	AB	AA
31	AB	AB	4	AB	AB	AB	4	AB	1	1	AA	AB	NA	1	AA	AB	2	BB	AB	AB	AB	AB	AA	BB	BB	AA	AB	2	4	AB	AB	AB	AA	AA	1	NA	BB	AB	2	1	AB	AB	BB	4	AB	AA	AB	BB	BB
32	AA	AA	1	BB	BB	BB	4	AA	1	1	AB	AB	AA	1	AA	AA	3	AA	BB	AA	BB	AA	AB	AB	AB	AB	AB	4	4	AB	AA	BB	AA	AA	1	AB	AB	NA	3	3	BB	AA	BB	2	AB	AB	BB	AB	AB
33	AB	AB	2	AA	AA	AA	1	AA	4	3	AA	AA	AA	1	AA	AB	1	AA	BB	AA	BB	AA	BB	AA	AB	AB	AA	3	1	NA	AA	BB	AB	AB	4	AB	BB	AB	2	1	AB	AB	BB	4	AA	AA	AB	AB	AA
34	AA	AA	2	AB	AB	AB	1	AB	3	4	AB	BB	AB	NA	BB	AB	1	BB	BB	AB	AB	AB	AA	BB	BB	AB	AB	4	4	BB	AB	AB	AB	BB	1	AA	BB	AA	2	1	AA	AB	BB	4	AA	AB	AB	AB	AB
35	AA	AA	NA	BB	BB	AB	1	AB	2	2	AA	AB	AB	1	AA	AB	3	AA	BB	AA	BB	AA	AB	AB	AB	AB	AB	4	4	AB	AA	BB	BB	AB	1	AA	BB	AA	2	1	AA	AB	BB	3	AB	AA	AB	AB	AB
36	AA	AA	NA	BB	BB	AB	1	AA	2	2	AA	AB	AB	2	NA	AA	2	BB	AB	AB	AB	AB	AA	BB	BB	NA	AB	2	NA	BB	AB	AB	AA	AB	NA	AB	AB	AB	3	3	BB	AA	BB	2	AB	AA	AB	AB	BB
37	AB	AB	4	AA	AA	AA	NA	AB	3	4	AA	BB	AB	2	BB	AB	3	AB	BB	AA	BB	AA	BB	AA	AB	AB	AA	3	3	AA	AB	AB	AA	AB	1	AB	BB	AB	2	2	AB	AB	BB	4	NA	AB	AB	AB	BB
38	AB	AB	4	AB	AB	AB	1	AB	2	2	AA	AB	AB	2	BB	BB	3	AB	BB	AA	BB	AA	AB	AB	AB	AB	AB	4	4	AB	AB	AB	AB	AB	2	AB	AB	AB	3	3	BB	AA	BB	1	AB	AB	AB	AA	AA
39	AB	AB	4	AB	AB	AB	4	AB	1	1	AA	AB	AA	1	AA	AB	3	AB	BB	AA	BB	AA	AB	AB	AB	AB	AB	4	4	BB	AB	AB	AA	AB	4	AB	BB	AB	2	1	AB	AB	BB	4	AA	AA	AB	BB	BB
40	AA	AA	NA	BB	BB	BB	4	AB	2	2	AB	AB	AB	2	AB	AA	1	AB	BB	AB	AB	AB	AA	BB	BB	AA	AB	2	NA	AB	AA	BB	AB	BB	2	AA	AB	AA	1	1	AA	AB	AB	4	AB	AA	AB	AA	AA
41	AA	AA	NA	BB	BB	BB	4	AB	1	1	AB	AB	AA	1	AA	BB	4	AB	AB	AA	BB	AA	AB	AB	AB	AB	AB	4	4	AB	AB	AB	AB	AB	2	AB	BB	AB	2	1	AB	AB	BB	4	AA	AA	AB	BB	BB
42	AA	AA	1	AB	AB	AA	1	AB	3	4	AA	AB	AB	1	AA	BB	4	AA	AB	AA	BB	AA	BB	AA	AB	AB	AB	1	3	AA	AA	BB	AB	AB	4	AB	AA	AB	4	1	BB	AA	BB	1	AB	AA	AB	AB	BB
43	AB	AB	4	AB	AB	AB	4	AA	1	1	AA	AA	AA	1	AA	AB	3	AA	BB	AA	BB	AA	AB	AB	AB	AB	AB	4	4	AB	AA	BB	AB	AB	4	AA	BB	AB	2	2	AA	AB	AB	4	AB	AB	BB	AB	BB
44	AB	AB	2	AA	AA	AA	1	AA	4	3	AA	AA	AB	2	AA	AB	2	AB	AB	AB	AB	AB	AA	BB	BB	AA	AB	4	4	AB	AB	AB	AA	AB	1	AB	BB	AB	2	1	AB	AB	BB	4	AA	AA	AB	BB	BB
45	AB	AB	2	AA	AA	AA	1	AA	3	4	AA	AB	AB	2	AB	AB	1	AB	BB	AB	AB	AB	AB	AB	BB	AA	AA	3	3	NA	AA	BB	BB	BB	4	AA	AA	AA	4	3	AB	AA	AB	1	BB	AA	AB	AB	AA
46	AA	AA	NA	AB	AB	AB	NA	AA	3	NA	AB	AB	AB	1	AB	AB	NA	BB	BB	AB	AB	AB	AA	AB	BB	NA	AA	NA	NA	NA	AB	AB	BB	AB	2	AA	AB	AB	1	NA	AA	AB	AB	4	NA	AB	BB	AB	NA
47	AB	AB	4	AB	AB	BB	4	AA	1	1	AB	AB	AA	1	AA	AA	3	AB	BB	AA	BB	AA	BB	AA	AB	AB	AA	3	3	AA	AB	AB	AB	BB	4	AA	AA	AA	4	3	AB	AA	AB	2	AB	AA	AB	BB	AB
48	AA	AB	2	AB	AB	AB	1	AA	4	3	AB	AA	AA	2	AB	AB	1	AB	BB	AB	AB	AB	AB	AB	BB	AA	AA	1	3	NA	AA	BB	AA	AB	2	AB	AA	AB	4	3	BB	AA	AB	2	BB	AB	AB	BB	AB
49	AB	AB	4	AB	AB	AB	1	AB	2	2	AA	BB	AB	2	BB	AB	1	AB	BB	AB	AB	AB	AB	AB	BB	AB	AA	3	3	AA	AA	BB	AB	BB	1	AA	BB	AA	2	2	AA	AB	BB	4	AB	AB	AB	AB	BB
50	AA	AA	4	AB	AB	AB	1	AB	3	4	AB	BB	AB	2	BB	AB	2	BB	AB	AB	AB	AB	AA	BB	BB	AA	AB	2	3	AB	AB	AB	AB	BB	4	AA	BB	AA	2	2	AA	AB	BB	4	AA	AA	AB	AA	AA
51	AB	AA	4	BB	BB	AB	4	AA	1	1	AA	AB	AA	NA	AA	AA	1	AB	BB	AB	AB	AB	AB	AB	BB	AB	AA	3	3	AA	AA	BB	AB	AB	1	AB	AB	AB	3	3	BB	AA	BB	1	BB	AA	AB	BB	AB
52	AB	AA	4	BB	AB	AB	1	AA	1	1	AA	AB	AB	1	AA	AB	4	AA	AB	AA	BB	AA	AB	AB	AB	AB	AB	4	4	BB	AA	BB	AB	AA	4	AB	AA	NA	4	NA	BB	AA	AB	1	AB	AB	BB	AA	AB
53	AB	AA	1	AA	AA	AA	1	AB	3	4	AA	AB	AB	2	BB	BB	2	AB	AB	AB	AB	AB	AB	AB	BB	AA	AA	3	3	NA	AA	BB	AB	BB	1	AA	BB	AA	2	2	AA	AB	BB	4	AA	AB	AB	BB	BB
54	AB	AA	1	AB	AB	AA	1	AB	4	3	AA	AA	AA	1	AA	AB	1	AB	BB	AA	BB	AA	AB	AB	AB	AB	AB	4	4	AB	AB	AB	BB	BB	1	AA	BB	AA	2	2	AA	AB	BB	4	AA	AA	AB	BB	AB
55	AA	AA	4	BB	BB	BB	1	AB	2	2	AB	AB	AB	2	BB	BB	4	AB	AB	AA	BB	AA	AB	AB	AB	AB	AB	2	4	AB	AB	AB	AB	BB	4	AA	AB	AA	3	3	AB	AA	AB	2	BB	AB	AB	AA	AB
56	AA	AA	2	AB	AB	AB	1	AB	4	3	AB	AB	AA	1	AA	BB	2	AB	AB	AB	AB	AB	AA	BB	BB	AA	AB	2	NA	AB	AA	BB	AB	AA	1	AB	BB	NA	2	1	AB	AB	BB	4	AB	AA	BB	AB	BB
57	AA	AA	4	BB	BB	BB	4	AB	1	1	AB	AB	AA	1	AA	AA	4	AA	AB	AA	BB	AA	BB	AA	AB	AB	AA	1	3	AA	AA	BB	AB	AB	1	AA	BB	AA	2	1	AA	AB	BB	4	AA	AA	BB	AB	BB
58	AA	AA	2	AB	AB	AB	1	AA	4	3	AB	AA	AA	1	AA	AB	4	AB	AB	AB	AB	AB	AB	AB	BB	AB	AA	1	NA	NA	AA	BB	AA	AB	4	AB	AA	NA	4	4	BB	AA	AB	2	BB	AB	BB	BB	BB
59	AA	AA	4	AB	AB	AA	1	AA	3	4	AA	AB	AB	2	AB	AB	1	AA	BB	AA	BB	AA	BB	AA	AB	AB	AA	3	1	NA	AA	BB	BB	AB	1	AA	BB	AB	2	2	AA	AB	BB	4	AB	AB	BB	BB	BB
60	AA	AB	2	AA	AA	AB	1	AB	4	3	AB	AB	AA	1	AA	AB	1	AB	BB	AA	BB	AA	BB	AA	AB	AB	AA	1	1	NA	AB	AB	AB	AA	4	AB	AB	NA	3	3	BB	AA	BB	1	AB	AA	BB	AA	AB
61	AA	AA	1	AB	AB	AB	1	AB	4	3	AB	AB	AA	1	AA	BB	2	BB	AB	AB	AB	AB	AB	AB	BB	AB	AA	1	3	NA	AB	AB	AA	AA	1	AB	AB	NA	3	3	BB	AA	BB	2	AB	AB	BB	AB	BB
62	AA	AA	4	AB	AB	AB	1	AB	4	3	AB	AA	NA	1	AA	AB	3	AA	BB	AA	BB	AA	AB	AB	AB	AB	AB	4	4	BB	AA	BB	AB	AB	4	NA	AB	AB	3	3	BB	AA	BB	4	AB	AA	AB	AB	AB
63	AB	AB	4	AB	AB	AB	1	AB	1	1	AA	AB	AA	1	AA	BB	1	AB	BB	AB	AB	AB	AA	BB	BB	AB	AB	2	4	AB	AA	BB	AB	AB	4	AB	AB	AB	1	1	AB	AB	AB	4	AB	AA	AB	BB	BB
64	AA	AA	1	BB	BB	BB	NA	AA	2	2	AB	AB	AB	2	AB	AA	2	BB	AB	AB	AB	AB	AB	AB	BB	AA	AA	1	3	NA	AB	AB	BB	AB	2	AA	AB	AB	1	1	AA	AB	AB	4	NA	AB	BB	AB	AB
65	AA	AA	4	AB	AB	AB	1	AB	4	3	AB	AB	AA	1	AA	AB	4	AB	AB	AA	BB	AA	BB	AA	AB	AB	AA	3	1	AA	AB	AB	AB	BB	2	AA	AB	AB	1	1	AA	AB	AB	4	AA	AB	BB	AB	BB
66	AA	AB	4	AB	AB	BB	4	AA	1	1	AB	AB	AA	2	AB	AA	4	AB	AB	AA	BB	AA	AB	AB	AB	AB	AB	2	4	AB	AB	AB	AB	AB	2	AB	AB	AB	1	4	AB	AB	AB	4	AA	AB	AB	AB	AA
67	AA	AB	2	AB	AB	AB	1	AA	3	4	AB	AB	AB	2	AB	AB	1	AB	AB	AA	BB	AA	BB	AA	AB	AB	AA	1	1	NA	AB	AB	AB	AB	1	AB	AB	AB	3	3	BB	AA	BB	1	BB	AB	AB	AA	AB
68	AB	AA	4	AB	AA	AA	1	AB	3	4	AA	BB	NA	2	BB	AB	3	AB	BB	AA	BB	AA	AB	AB	AB	AB	AA	4	4	AB	AB	AB	AB	BB	4	NA	BB	AB	2	1	AA	AB	BB	4	AA	AB	BB	AA	AB
69	AB	AA	4	AB	AB	AA	1	AB	3	4	AA	AB	AB	2	BB	BB	2	BB	AB	AB	AB	AB	AA	BB	BB	AB	AB	4	3	AB	AB	AB	BB	BB	4	AA	AB	AA	1	1	AA	AB	AB	4	AB	AA	AB	AB	BB
70	AA	AA	1	BB	BB	AB	1	AB	2	2	AA	BB	AB	NA	BB	AB	1	BB	BB	AB	AB	AB	AA	BB	BB	AB	AB	2	3	AB	AB	AB	AB	AB	1	AA	BB	AA	2	2	AA	AB	BB	4	AA	AA	AB	AB	BB
71	AA	AA	4	AB	AB	AB	1	AA	4	3	AB	AB	AA	NA	AA	AA	3	AB	BB	AA	BB	AA	AB	AB	AB	NA	AA	4	3	BB	AA	BB	BB	BB	NA	AA	AB	AB	1	1	AA	AB	AB	4	AA	AB	AB	AA	AB
72	AB	AA	2	AA	AA	AA	1	AB	3	4	AA	AB	AB	NA	BB	BB	2	BB	AB	AB	AB	AB	AA	BB	BB	AA	AB	4	4	BB	AB	AB	AB	BB	2	AA	AB	AA	1	1	AA	AB	BB	4	AA	AA	AB	AB	BB
73	AA	AA	1	AB	AB	AA	4	AA	4	3	AA	AA	AA	1	AA	AB	1	AB	AB	AB	AB	AB	AA	BB	BB	AB	AB	2	4	AB	AA	BB	AB	AB	2	AA	AA	AB	4	4	AB	AA	AB	2	BB	AB	BB	AA	AA
74	AA	AA	1	BB	BB	BB	4	AA	1	1	AB	AB	AA	2	AB	AA	2	AB	AB	AB	AB	AB	AB	AB	BB	AB	AA	1	3	AA	AA	BB	AB	BB	2	AA	AB	AA	1	1	AA	AB	AB	4	AB	AB	AB	AB	AA
75	AB	AA	NA	AB	AB	AA	1	AB	4	3	AA	AB	AA	1	AA	BB	1	BB	BB	AB	AB	AB	AB	AB	BB	AB	AA	3	NA	NA	AB	AB	AA	AA	NA	AB	AB	AB	1	NA	AB	AB	AB	4	AB	AA	BB	AB	AB
76	AA	AB	NA	AA	AB	AB	1	AB	3	4	AB	AB	AB	NA	BB	BB	3	AA	BB	AA	BB	AA	AB	AB	AB	AB	AB	2	2	AB	AA	BB	BB	BB	NA	AA	AA	AA	4	NA	AB	AA	AB	1	AB	AA	AB	BB	AB
77	AB	AB	2	AA	AA	AA	1	AA	3	4	AA	AB	NA	1	AA	BB	3	AB	BB	AA	BB	AA	BB	AA	AB	AB	AA	3	1	AA	AB	AB	AA	AA	1	NA	AB	NA	3	3	BB	AA	AB	2	BB	AB	BB	BB	BB
78	AA	AA	NA	BB	BB	BB	NA	AA	1	NA	AB	AB	AA	NA	AA	AA	NA	BB	AB	AB	AB	AB	AB	AB	BB	NA	AA	NA	NA	NA	AB	AB	AA	AA	2	AB	AB	NA	1	NA	BB	AB	BB	4	NA	AB	BB	AA	NA
79	AB	AA	4	AB	AB	AA	1	AB	3	4	AA	AB	AB	2	BB	BB	3	AA	BB	AA	BB	AA	AB	AB	AB	AB	AA	4	4	BB	AA	BB	BB	BB	4	AA	AB	AA	1	1	AA	AB	AB	4	AB	AA	AB	AB	BB
80	AB	AB	4	AB	AB	AB	1	AA	2	2	AA	AB	AB	2	AB	AA	3	AA	BB	AA	BB	AA	BB	AA	AB	AB	AA	3	1	AA	AA	BB	BB	AB	4	AA	AB	AB	3	3	AB	AA	BB	1	AB	AA	BB	BB	BB
81	AB	AA	1	AA	AA	AA	1	AA	4	3	AA	AA	NA	1	AA	AB	2	AB	AB	AB	AB	AB	AB	AB	BB	NA	AA	1	3	NA	AA	BB	AA	AA	NA	AB	BB	AB	2	1	AB	AB	BB	4	AA	AA	AB	AB	AB
82	AB	AB	NA	AB	AB	AB	4	AB	1	1	AA	AB	AA	1	AA	AB	2	AB	AB	AB	AB	AB	AA	BB	BB	AA	AB	2	4	AB	AA	BB	AB	AA	1	AB	BB	NA	2	1	AB	AB	BB	4	AB	AB	BB	AB	BB
83	AA	AA	NA	BB	BB	BB	4	AA	1	1	AB	AB	AA	NA	AA	AB	2	BB	AB	AB	AB	AB	AB	AB	BB	AB	AB	1	4	AA	AB	AB	BB	AB	NA	AA	AB	AB	3	3	AB	AA	BB	1	AB	AB	BB	AA	NA
84	AB	AA	NA	AA	AA	AA	1	AA	3	4	AA	BB	AB	NA	BB	AB	NA	AB	AB	AB	AB	AB	AA	BB	BB	AB	AB	4	3	AB	AA	BB	AB	BB	NA	AA	AB	AA	3	3	AB	AA	BB	2	AB	AB	AB	BB	NA
85	AA	AA	4	AB	AB	AA	1	AB	3	4	AA	AB	AB	2	AB	AB	2	AB	AB	AB	AB	AB	AB	BB	BB	AB	AB	1	1	AA	AA	BB	BB	AB	1	AA	BB	AA	2	1	AA	AB	AB	4	AB	AA	AB	AB	BB
86	AB	AB	4	AB	AB	BB	4	AB	1	1	AB	AB	AA	1	AA	BB	3	AB	BB	AA	BB	AA	AB	AB	AB	AB	AB	4	4	BB	AB	AB	AB	AB	4	AA	BB	AB	2	2	AA	AB	BB	4	AA	AA	BB	BB	AB
87	NA	AA	1	AB	AB	NA	1	AA	4	3	AB	AB	AA	NA	AA	AA	1	AB	AB	AA	BB	AA	BB	AB	NA	AB	AB	3	1	NA	AB	AB	NA	BB	4	AA	AA	AA	4	NA	NA	AA	NA	2	AB	AA	AB	AA	AA
88	AB	AB	1	AB	AB	AB	1	AB	2	2	AA	BB	AB	NA	BB	AB	3	AB	BB	AA	BB	AA	AB	AB	AB	AB	AB	4	4	AB	AB	AB	AB	AB	2	AB	AB	AB	1	NA	AB	AB	AB	3	AB	AB	AB	BB	BB
89	AB	AB	4	AB	AB	BB	4	AB	1	1	AB	AB	AA	NA	AA	AB	4	AA	BB	AA	BB	AA	BB	AA	AB	NA	AA	1	3	AA	AA	BB	BB	AA	2	AA	AA	AB	4	3	BB	AA	AB	1	AB	AB	BB	BB	BB
90	AB	AB	NA	AA	AA	AB	1	AB	4	3	AB	AB	AA	1	AA	AB	3	AA	BB	AA	BB	AA	BB	AA	AB	AB	AA	3	3	AA	AA	BB	AB	AA	1	AB	AB	NA	3	3	BB	AA	BB	1	AB	AB	BB	AB	AB
91	AA	AB	NA	AA	AA	AB	1	AB	4	3	AB	AA	AA	NA	AA	AB	3	AB	BB	AA	BB	AA	BB	AA	AB	AB	AA	3	3	NA	AB	AB	AB	AB	NA	AA	BB	AB	2	1	AA	AB	BB	4	AA	AA	BB	BB	NA
92	AB	AB	NA	AA	AA	AA	1	AB	3	4	AA	BB	AB	2	BB	AB	NA	AB	BB	AA	BB	AA	AB	AB	AB	AB	AB	4	4	AB	AB	AB	AB	BB	NA	AA	BB	AA	2	1	AA	AB	AB	4	AB	AA	AB	AB	NA
93	AB	AB	NA	NA	AA	AA	1	AB	3	4	AA	AB	AB	1	AA	BB	4	AB	AB	AA	BB	AA	NA	AB	AB	AB	AB	4	4	BB	AB	AB	AB	BB	NA	AA	AA	AA	4	3	AB	AA	AB	2	BB	AA	AB	BB	NA
94	NA	NA	NA	NA	NA	NA	1	NA	4	3	NA	NA	NA	NA	NA	NA	1	NA	NA	NA	NA	NA	NA	NA	NA	AB	NA	4	3	AB	NA	NA	NA	NA	1	NA	NA	NA	2	1	NA	NA	NA	4	AA	NA	NA	NA	AA
95	AA	AA	NA	AB	AB	AB	1	AA	3	4	AB	AB	AB	2	AB	AB	3	AA	BB	AA	BB	AA	BB	NA	AB	NA	AA	3	2	AA	AA	BB	BB	AB	NA	AA	AA	AB	4	3	AB	AA	AB	1	BB	AA	BB	AB	BB
96	AB	AB	NA	NA	AA	AB	1	AB	3	4	AB	AB	AA	2	BB	BB	3	AB	BB	AA	BB	AA	NA	AB	AB	BB	NA	4	1	BB	AB	AB	AB	AA	NA	AB	AA	AA	4	NA	BB	AA	AB	1	BB	AA	BB	BB	BB
97	AB	AA	1	AB	AB	AA	1	AA	3	4	AA	AA	AB	1	AA	AB	3	AB	BB	AA	BB	AA	BB	AA	AB	BB	AA	1	3	AA	AB	AB	AA	AB	2	AB	AA	AB	4	3	BB	AA	AB	2	BB	AA	AB	AA	AA
98	AA	NA	1	NA	BB	BB	4	NA	1	1	NA	AB	AA	1	NA	AB	3	NA	BB	NA	BB	AA	NA	NA	AB	AB	NA	3	4	NA	NA	BB	AA	NA	4	AB	AB	NA	3	3	BB	AA	BB	4	BB	AA	NA	BB	BB
99	AA	AA	NA	BB	BB	BB	4	AA	2	1	AB	AB	AB	2	AB	AA	3	AA	BB	AA	BB	AA	BB	AA	AB	BB	AA	1	NA	NA	AA	BB	AA	AA	NA	AB	AB	AB	3	3	BB	AA	BB	2	AB	AA	AB	AB	NA
100	AA	AB	NA	AB	BB	BB	4	AB	1	NA	AB	AB	AA	2	BB	AB	NA	AB	AB	AA	BB	AA	BB	AA	AB	BB	AA	1	NA	NA	AB	AB	BB	BB	NA	AA	BB	AA	3	1	AA	AB	BB	4	AA	AA	AB	AA	NA
101	AA	AB	NA	AA	AA	AB	NA	AA	4	NA	AB	AA	AA	NA	AA	AB	NA	AB	AB	AB	AB	AB	AA	BB	BB	NA	AB	NA	NA	NA	AA	BB	AA	AB	NA	AB	AB	AA	1	NA	AB	AB	AB	4	NA	AB	AB	AB	NA
102	AA	AB	NA	NA	AB	AB	NA	AB	4	NA	AB	AB	AA	NA	AA	BB	NA	AB	BB	AA	BB	AA	NA	AB	AB	NA	AB	NA	NA	NA	AB	AB	BB	BB	NA	AA	AB	AA	1	NA	AA	AB	AB	4	NA	AA	NA	AA	NA
103	AA	AA	NA	AB	AB	AB	NA	AA	4	NA	AB	AA	AA	NA	AA	AB	NA	AB	BB	AB	AB	AB	AB	AB	BB	NA	AA	NA	NA	NA	AA	BB	AB	BB	NA	AA	AB	AA	1	NA	AA	AB	AB	4	NA	AA	AB	AB	NA
104	AA	AB	NA	AB	AB	AB	NA	AA	3	NA	AB	AB	AB	NA	AB	AB	NA	AB	AB	AA	BB	AA	AB	AB	AB	NA	AB	NA	NA	NA	AB	AB	AB	AA	NA	AB	BB	AA	2	NA	AB	AB	BB	4	NA	AB	BB	BB	NA
105	AB	AB	NA	NA	AB	AB	NA	AB	1	NA	AA	AB	AB	NA	AA	BB	NA	BB	AB	AB	AB	AB	NA	AB	BB	NA	AB	NA	NA	NA	AB	AB	AA	AB	NA	AB	AB	AB	1	NA	AB	AB	AB	4	NA	AA	AB	AB	NA
106	NA	AB	NA	AA	NA	NA	NA	AA	4	NA	AA	NA	AA	NA	AA	NA	NA	BB	NA	AB	NA	NA	AA	BB	NA	NA	NA	NA	NA	NA	AB	NA	NA	AB	NA	AA	NA	AB	2	NA	NA	NA	NA	4	NA	NA	NA	NA	NA
107	AA	AA	NA	AB	AB	AB	NA	AA	3	NA	AB	AB	AA	NA	AB	AB	NA	AB	AB	AB	AB	AB	AB	AB	BB	NA	AA	NA	NA	NA	AA	BB	BB	AB	NA	AA	AB	AA	1	NA	AA	AB	AB	4	NA	AA	AB	AB	NA
108	AA	AA	NA	BB	BB	BB	NA	AB	1	NA	AB	AA	AA	NA	AA	AB	NA	AB	BB	AB	AB	AB	AB	AB	BB	NA	AA	NA	NA	NA	AA	BB	BB	AB	NA	AA	AB	AA	1	NA	AA	AB	BB	4	NA	AA	AB	AB	NA
109	AA	AA	NA	NA	AB	AB	NA	AA	4	NA	AB	AB	AA	NA	AA	AA	NA	AB	AB	AB	AB	AB	NA	AB	BB	NA	AA	NA	NA	NA	AA	BB	AB	AB	NA	AB	AB	AB	3	NA	BB	AA	AB	1	NA	AA	AB	AB	NA
110	AB	AB	NA	AA	AA	AA	NA	AA	3	NA	AA	AB	AB	NA	BB	BB	NA	AA	AB	AA	BB	AA	BB	AB	AB	NA	AB	NA	NA	NA	AA	BB	AB	BB	NA	AA	BB	AA	2	NA	AA	AB	BB	4	NA	AA	AB	AB	NA
111	AA	AA	NA	BB	BB	BB	NA	AA	NA	NA	AB	BB	AA	NA	BB	AB	NA	AB	AB	AB	AB	AB	AA	BB	BB	NA	AB	NA	NA	NA	AA	BB	BB	AB	NA	AA	AB	AB	NA	NA	AB	AA	AB	1	NA	AB	BB	AA	NA
112	AB	AB	NA	AA	AA	AB	NA	AA	4	NA	AB	AA	AA	NA	AA	AB	NA	AB	BB	AA	BB	AA	AB	AB	AB	NA	AA	NA	NA	NA	AB	AB	AB	BB	NA	AA	AB	AA	3	NA	AB	AA	AB	2	NA	AA	AB	AB	NA
113	AA	AB	NA	AB	AB	BB	NA	AA	1	NA	AB	AB	AA	NA	AA	AA	NA	AB	BB	AB	AB	AB	AA	BB	BB	NA	AB	NA	NA	NA	AA	BB	BB	AB	NA	AA	AB	AA	1	NA	AA	AA	AB	4	NA	AA	AB	BB	NA
114	AB	AB	NA	AA	AA	AA	NA	AB	3	NA	AA	AB	AB	NA	AA	BB	NA	AB	BB	AB	AB	AB	AB	AB	BB	NA	AA	NA	NA	NA	AA	BB	AB	AA	NA	AB	AB	AA	3	NA	BB	AA	BB	4	NA	AB	BB	AB	NA
115	AB	AB	NA	AA	AA	AA	NA	AA	4	NA	AA	AB	AA	NA	AA	AA	NA	AA	AB	AA	BB	AA	AB	AB	AB	NA	AB	NA	NA	NA	AA	BB	AB	AA	NA	AB	AB	AA	1	NA	AB	AB	AB	4	NA	AB	BB	AB	NA
116	AB	AA	NA	BB	BB	AB	NA	AB	2	NA	AA	AB	AB	NA	AA	AB	NA	AA	AB	AB	AB	AB	AB	AB	BB	NA	AA	NA	NA	NA	AA	BB	AB	BB	NA	AA	AA	AA	4	NA	AB	AA	AB	2	NA	AB	AB	AA	NA
117	AA	AA	NA	BB	BB	AB	NA	AB	1	NA	AA	AB	AA	NA	AA	AA	NA	AA	BB	AA	BB	AA	BB	AA	AB	NA	AA	NA	NA	NA	AA	BB	AB	AB	NA	AA	AB	AB	1	NA	AA	AB	AB	4	NA	AB	BB	AA	NA
118	AB	AB	NA	AB	AB	AB	NA	AB	2	NA	AA	AB	AB	NA	AB	AA	NA	AB	AB	AB	AB	AB	AB	AB	BB	NA	AA	NA	NA	NA	AA	BB	BB	AB	NA	AA	AB	AB	1	NA	AA	AB	AB	4	NA	AB	BB	AA	NA
119	AA	AA	NA	AB	AB	AB	NA	AB	NA	NA	AB	AB	AA	NA	BB	BB	NA	AA	AB	AA	BB	AA	AB	AB	AB	NA	AB	NA	NA	NA	AA	BB	AB	AB	NA	AA	AA	AB	4	NA	AB	AA	AB	2	NA	AB	BB	AB	NA
120	AB	AB	NA	AA	AA	AB	NA	AA	4	NA	AB	AA	AA	NA	AA	AB	NA	AB	AB	AA	BB	AA	AB	AB	AB	NA	AB	NA	NA	NA	AB	AB	AB	AB	NA	AA	AB	AA	1	NA	AA	AB	AB	4	NA	AA	AB	AA	NA
121	AB	AB	NA	AB	AB	AB	NA	AA	1	NA	AA	AA	AA	NA	AA	AB	NA	AB	BB	AA	BB	AA	BB	AA	AB	NA	AA	NA	NA	NA	AB	AB	AA	AA	NA	AB	AB	AA	1	NA	AB	AB	BB	4	NA	AA	BB	AB	NA
122	AB	AB	NA	AA	AA	NA	NA	AB	4	NA	AB	AB	AA	NA	AA	BB	NA	AA	AB	AA	BB	AA	BB	AA	AB	NA	AB	NA	NA	NA	AA	BB	AA	AA	NA	AB	AA	AA	4	NA	BB	AA	AB	2	NA	AA	BB	BB	NA
123	AA	AA	NA	AB	AB	AB	NA	AA	3	NA	AB	AB	AB	NA	AB	AB	NA	AA	AB	AA	BB	AA	BB	AA	AB	NA	AA	NA	NA	NA	AA	BB	AB	BB	NA	AA	AB	AA	3	NA	AB	AA	BB	2	NA	AA	AB	AA	NA
124	AA	AA	NA	BB	BB	BB	NA	AB	1	NA	AB	AB	AA	NA	AA	AB	NA	AA	AB	AA	BB	AA	AB	AB	AB	NA	AB	NA	NA	NA	AA	BB	AA	AA	NA	AB	BB	AA	2	NA	AB	AB	BB	4	NA	AB	BB	BB	NA
125	AB	AB	NA	AA	AA	AA	NA	AB	4	NA	AA	AB	AA	NA	AA	BB	NA	AB	AB	AB	AB	AB	AB	AB	BB	NA	AA	NA	NA	NA	AA	BB	AB	BB	NA	AA	AA	AA	3	NA	AB	AA	BB	2	NA	AA	AB	AB	NA
126	AB	AB	NA	AB	AB	BB	NA	AB	2	NA	AB	AB	AB	NA	BB	BB	NA	AA	AB	AA	BB	AA	BB	AA	AB	NA	AB	NA	NA	NA	AA	BB	AB	BB	NA	AA	AA	AB	4	NA	AB	AA	BB	NA	NA	AB	BB	AB	NA
127	AB	AB	NA	AB	AB	AB	NA	AA	4	NA	AA	BB	AB	NA	AA	AB	NA	AB	AB	AA	BB	AA	AB	AB	AB	NA	AB	NA	NA	NA	AB	AB	AB	BB	NA	AA	AA	AB	4	NA	AB	AA	AB	2	NA	AB	AB	AB	NA
128	AB	AB	NA	AA	AA	AA	NA	AB	2	NA	AA	AB	AA	NA	AA	BB	NA	BB	AB	AB	AB	AB	AA	BB	BB	NA	AB	NA	NA	NA	AB	AB	AA	AB	NA	AB	AA	AB	3	NA	BB	AA	AB	2	NA	AA	AB	AB	NA
129	AB	AB	NA	AB	AB	AB	NA	AB	2	NA	AA	BB	AB	NA	BB	AB	NA	BB	AB	AB	AB	AB	AB	AB	BB	NA	AA	NA	NA	NA	AB	AB	AA	AA	NA	AB	AB	AA	2	NA	BB	AA	BB	4	NA	AB	BB	AB	NA
130	AB	AB	NA	AB	AB	NA	NA	AB	4	NA	AA	BB	AB	NA	BB	AB	NA	AA	BB	AA	BB	AA	AB	AB	AB	NA	AB	NA	NA	NA	AA	BB	AB	AB	NA	AA	BB	AB	3	NA	AA	AB	BB	1	NA	AB	BB	AB	NA
131	AA	AA	NA	NA	AB	AB	NA	AB	4	NA	AB	AB	AA	NA	BB	BB	NA	AA	BB	AA	BB	AA	AB	AB	AB	NA	AB	NA	NA	NA	AA	BB	BB	BB	NA	AA	AB	AB	4	NA	AB	AA	BB	1	NA	AB	BB	AA	NA
132	AA	NA	NA	NA	AB	AB	NA	NA	4	NA	NA	AA	AA	NA	NA	AB	NA	NA	BB	NA	BB	AA	NA	NA	AB	NA	AA	NA	NA	NA	NA	BB	AB	NA	NA	AB	AA	NA	1	NA	BB	AB	AB	4	NA	NA	AB	AB	NA
133	AB	AB	NA	AA	AA	AA	NA	AB	2	NA	AA	AB	AA	NA	AA	BB	NA	AB	BB	AA	BB	AA	AB	AB	AB	NA	AB	NA	NA	NA	AB	AB	AB	AA	NA	AB	AB	AA	4	NA	AB	AB	AB	2	NA	AA	BB	BB	NA
134	AB	AB	NA	AB	AB	AB	NA	AA	4	NA	AA	AB	AB	NA	AB	AB	NA	AA	BB	AA	BB	AA	BB	AA	AB	NA	AA	NA	NA	NA	AA	BB	AB	BB	NA	AA	AA	AA	4	NA	AB	AA	BB	NA	NA	NA	AB	AB	NA
135	AA	AB	NA	AA	AA	AB	NA	AB	1	NA	AB	AB	AA	NA	AB	AB	NA	BB	BB	AB	AB	AB	AB	AB	BB	NA	AA	NA	NA	NA	AB	AB	AA	AB	NA	AB	AA	AB	4	NA	BB	AA	AB	2	NA	AA	AB	BB	NA
136	AB	AB	NA	AB	AB	BB	NA	AA	2	NA	AB	AB	AA	NA	AA	AA	NA	AB	AB	AB	AB	AB	AB	AB	BB	NA	AA	NA	NA	NA	AA	BB	AA	AB	NA	AB	AA	AB	3	NA	BB	AA	AB	2	NA	AB	AB	AA	NA
137	AB	AB	NA	AB	AB	BB	NA	AA	2	NA	AB	AB	AB	NA	AB	AA	NA	BB	AB	AB	AB	AB	AA	BB	BB	NA	AB	NA	NA	NA	AB	AB	AA	AB	NA	AB	AB	AB	3	NA	BB	AA	AB	1	NA	AA	AB	AA	NA
138	AB	AB	NA	AB	AB	NA	NA	AA	1	NA	AA	AB	AB	NA	AB	AA	NA	BB	AB	AB	AB	AB	AB	AB	BB	NA	AA	NA	NA	NA	AB	AB	AB	AB	NA	AB	AB	AB	4	NA	BB	AA	AB	1	NA	AA	AB	AA	NA
139	AA	AB	NA	BB	BB	BB	NA	AA	1	NA	AB	AA	AA	NA	AA	AB	NA	AB	BB	AA	BB	AA	AB	AB	AB	NA	AB	NA	NA	NA	AB	AB	AB	AA	NA	AB	AA	AB	4	NA	BB	AA	AB	1	NA	AA	AB	AB	NA
140	AA	AB	NA	AA	AA	AB	NA	AA	3	NA	AB	AB	AB	NA	AB	AB	NA	AA	BB	AA	BB	AA	BB	AA	AB	NA	AA	NA	NA	NA	AA	BB	BB	AB	NA	AA	AB	AB	1	NA	AA	AB	AB	4	NA	AB	BB	BB	NA
141	AB	AB	NA	AA	AA	AA	NA	AB	3	NA	AA	AB	AB	NA	BB	BB	NA	AB	BB	AA	BB	AA	AB	AB	AB	NA	AB	NA	NA	NA	AB	AB	BB	BB	NA	AA	BB	AA	2	NA	AA	AB	BB	4	NA	AB	AB	AB	NA
142	AB	AB	NA	AB	AB	AB	NA	AB	1	NA	AA	AB	AA	NA	AA	AA	NA	AB	AB	AB	AB	AB	AB	AB	BB	NA	AA	NA	NA	NA	AA	BB	AB	AA	NA	AB	BB	AA	2	NA	AB	AB	BB	4	NA	AA	BB	AB	NA
143	AB	AB	NA	NA	AA	AA	NA	AB	4	NA	AA	AB	AA	NA	AA	BB	NA	AB	AB	AA	BB	AA	NA	AA	AB	NA	AA	NA	NA	NA	AB	AB	AA	AA	NA	AB	BB	AA	2	NA	AB	AB	BB	4	NA	NA	NA	AB	NA
144	AB	AB	NA	AB	AB	BB	NA	AB	1	NA	AB	AB	AA	NA	AA	AB	NA	AB	AB	AA	BB	AA	AB	AB	AB	NA	AB	NA	NA	NA	AB	AB	AB	AB	NA	AA	AB	AB	1	NA	AA	AB	AB	4	NA	AB	BB	AB	NA
145	AA	AB	NA	AA	AA	AB	NA	AA	4	NA	AB	AA	AA	NA	AA	AB	NA	AB	BB	AB	AB	AB	AA	BB	BB	NA	AA	NA	NA	NA	AA	BB	BB	BB	NA	AA	AB	AA	3	NA	AB	AA	BB	1	NA	AB	AB	AA	NA
146	NA	AA	NA	NA	NA	NA	NA	AA	3	NA	AB	NA	AB	NA	NA	NA	NA	AA	NA	AA	NA	NA	AB	AB	NA	NA	NA	NA	NA	NA	AA	NA	NA	AA	NA	AB	NA	AA	2	NA	NA	NA	NA	4	NA	NA	NA	NA	NA
147	AB	AB	NA	AA	AA	AA	NA	AA	3	NA	AA	AB	NA	NA	NA	AB	NA	BB	AB	AB	AB	AB	AB	AB	BB	NA	AA	NA	NA	NA	AB	AB	AA	AA	NA	NA	AA	AB	3	NA	BB	AA	BB	2	NA	AA	AB	AA	NA
148	AB	AB	NA	AA	AA	AA	NA	AB	3	NA	AA	AB	AB	NA	AB	AB	NA	AA	BB	AA	BB	AA	AB	AB	AB	NA	AA	NA	NA	NA	AA	BB	AB	AA	NA	AB	AB	AA	3	NA	BB	AA	BB	1	NA	AA	BB	AB	NA
149	AB	AB	NA	AB	AB	AB	NA	AB	1	NA	AA	AB	AA	NA	AA	BB	NA	BB	BB	AB	AB	AB	AB	AB	BB	NA	AA	NA	NA	NA	AB	AB	AB	NA	NA	NA	AB	NA	1	NA	AB	AB	AB	4	NA	AA	AB	BB	NA
150	AB	AB	NA	AA	AA	AA	NA	AA	3	NA	AA	AB	AB	NA	AB	AA	NA	AA	BB	AA	BB	AA	AB	AB	AB	NA	AA	NA	NA	NA	AA	BB	BB	AB	NA	AA	BB	AB	1	NA	AA	AB	AB	4	NA	AB	BB	BB	NA
151	AB	AB	NA	NA	AB	AB	NA	AA	1	NA	AA	AB	AA	NA	AA	AA	NA	BB	BB	AB	AB	AB	AB	AB	BB	NA	AA	NA	NA	NA	AB	AB	BB	BB	NA	AA	BB	AA	2	NA	AA	AB	AB	4	NA	AA	AB	AB	NA
152	AA	AA	NA	AB	AB	AA	NA	AA	4	NA	AA	AB	AA	NA	AA	AA	NA	AB	AB	AA	BB	AA	BB	AA	AB	NA	AA	NA	NA	NA	AB	AB	AA	AA	NA	AB	BB	AA	2	NA	AB	AB	BB	4	NA	AA	BB	AA	NA
153	AB	AB	NA	NA	AA	AA	NA	AB	4	NA	AA	AB	AA	NA	AA	BB	NA	AB	BB	AB	AB	AB	AA	BB	BB	NA	AA	NA	NA	NA	AA	BB	AB	BB	NA	AA	AB	AA	1	NA	AA	AB	BB	4	NA	AA	AB	AB	NA
154	AA	AA	NA	NA	AB	AB	NA	AB	4	NA	AB	AB	AA	NA	AA	BB	NA	AB	AB	AA	BB	AA	BB	AA	AB	NA	AA	NA	NA	NA	AB	AB	AA	AB	NA	AB	AB	AB	3	NA	BB	AA	AB	2	NA	AB	AB	AB	NA
155	AB	AB	NA	NA	AA	AA	NA	AA	4	NA	AA	AB	AA	NA	AA	AA	NA	AB	BB	AA	BB	AA	NA	AB	AB	NA	AA	NA	NA	NA	AB	AB	AB	AB	NA	AB	AB	AB	3	NA	BB	AA	BB	1	NA	AA	AB	BB	NA
156	AA	AA	NA	BB	BB	BB	NA	AB	1	NA	AB	AB	AA	NA	AA	AA	NA	AA	BB	AA	BB	AA	BB	AA	AB	NA	AA	NA	NA	NA	AA	BB	AB	AA	NA	AB	AB	AA	2	NA	AB	AB	BB	4	NA	AB	BB	AB	NA
157	AA	AB	NA	NA	AB	AB	NA	AB	4	NA	AB	AB	AA	NA	AA	BB	NA	BB	AB	AB	AB	AB	AA	BB	BB	NA	AB	NA	NA	NA	AB	AB	AA	AA	NA	AB	BB	AA	2	NA	AB	AB	BB	4	NA	AB	BB	BB	NA
158	AB	AB	NA	AA	AA	AA	NA	AA	4	NA	AA	AB	AA	NA	AA	BB	NA	AA	AB	AA	BB	AA	BB	AA	AB	NA	AA	NA	NA	NA	AA	BB	BB	AB	NA	AA	AB	AB	1	NA	AA	AB	AB	4	NA	AA	BB	BB	NA
159	AA	AA	NA	AB	AB	AA	NA	AA	3	NA	AA	AB	AB	NA	NA	AB	NA	AB	BB	AA	BB	AA	BB	AA	AB	NA	AA	NA	NA	NA	AB	AB	BB	BB	NA	AA	AB	AB	3	NA	AB	AA	BB	1	NA	AB	AB	AB	NA
160	AA	AA	NA	AB	AB	AB	NA	AB	4	NA	AB	AA	AA	NA	AA	AB	NA	BB	AB	AB	AB	AB	AB	BB	BB	NA	AB	NA	NA	NA	AB	AB	BB	BB	NA	AA	BB	AA	2	NA	AA	AB	BB	4	NA	AA	AB	AA	NA
161	AA	AB	NA	AA	AB	AB	NA	AA	3	NA	AB	AB	AA	NA	AB	AB	NA	AB	AB	AA	BB	AA	AB	AB	AB	NA	AB	NA	NA	NA	AB	AB	BB	AB	NA	AA	AB	AB	3	NA	AB	AA	BB	1	NA	AB	BB	BB	NA
162	AB	AA	NA	NA	BB	AB	NA	AA	2	NA	AA	BB	AB	NA	AA	AB	NA	BB	BB	AB	AB	AB	AB	AB	BB	NA	AA	NA	NA	NA	AB	AB	AB	AB	NA	AA	AB	AA	1	NA	AA	AB	AB	4	NA	AA	AB	AB	NA
163	AB	AA	NA	NA	AA	AA	NA	AA	3	NA	AA	AB	NA	NA	AB	AB	NA	AA	AB	AA	BB	AA	NA	AB	AB	NA	NA	NA	NA	NA	AA	BB	AB	AB	NA	AA	BB	AB	2	NA	AA	AB	BB	4	NA	AB	BB	AB	NA
164	AB	AA	NA	AA	AA	AA	NA	AB	3	NA	AA	AB	AB	NA	BB	AB	NA	AB	AB	AB	AB	AB	AA	BB	BB	NA	AB	NA	NA	NA	AA	BB	BB	BB	NA	AA	AB	AA	4	NA	AB	AA	AB	1	NA	AA	AB	AB	NA
165	AB	AB	NA	NA	AA	AB	NA	AB	NA	NA	AB	AB	AA	NA	AA	AB	NA	AB	AB	AA	BB	AA	NA	AB	AB	NA	AB	NA	NA	NA	AB	AB	BB	AB	NA	AA	AA	AB	NA	NA	AB	AA	BB	1	NA	AB	BB	AA	NA
166	AB	AB	NA	AB	AB	AB	NA	AA	2	NA	AA	AB	AB	NA	AB	AA	NA	BB	AB	AB	AB	AB	AB	AB	BB	NA	AA	NA	NA	NA	AB	AB	AB	AB	NA	AA	BB	AB	2	NA	AA	AB	AB	4	NA	AB	BB	AB	NA
167	AB	AA	NA	NA	AB	AA	NA	AA	4	NA	AA	AA	AA	NA	AA	AB	NA	AB	AB	AA	BB	AA	AB	AB	AB	NA	AB	NA	NA	NA	AB	AB	AA	AA	NA	AB	BB	AB	2	NA	AB	AB	AB	4	NA	AA	AB	AB	NA
168	AB	AB	NA	AA	AA	AB	NA	AA	4	NA	AB	AB	AA	NA	AA	AA	NA	AB	AB	AA	BB	AA	AB	AB	AB	NA	AB	NA	NA	NA	AB	AB	AA	AB	NA	AB	AB	AB	3	NA	BB	AA	BB	2	NA	AA	AB	AB	NA
169	AA	AA	NA	NA	BB	BB	NA	AB	1	NA	AB	AB	AA	NA	AA	AB	NA	AA	AB	AA	BB	AA	BB	AA	AB	NA	AA	NA	NA	NA	AA	BB	AB	BB	NA	AA	AA	AA	4	NA	AB	AA	AB	2	NA	AA	AB	BB	NA
170	AB	AB	NA	NA	AA	AB	NA	AB	3	NA	AB	AB	AB	NA	AA	AB	NA	AA	BB	AB	AB	AB	NA	AB	BB	NA	NA	NA	NA	NA	AB	BB	BB	AA	NA	AA	BB	AA	2	NA	AA	AB	BB	4	NA	AA	BB	AB	NA
172	AA	AA	NA	NA	AB	AB	NA	AA	4	NA	AB	AA	AA	NA	AA	AB	NA	AB	AB	AB	AB	AB	AB	AB	BB	NA	AA	NA	NA	NA	AA	BB	BB	BB	NA	AA	BB	AA	2	NA	AA	AB	BB	4	NA	AA	AB	AB	NA
173	AA	AA	NA	BB	BB	AB	NA	AB	1	NA	AA	AB	NA	NA	AA	BB	NA	BB	AB	AB	AB	AB	AB	AB	BB	NA	AA	NA	NA	NA	AB	AB	BB	AB	NA	AA	AB	AB	3	NA	AB	AA	BB	1	NA	AB	BB	AB	NA
174	AA	AB	NA	AA	AA	AB	NA	AB	4	NA	AB	AA	AA	NA	AB	AB	NA	BB	BB	AB	AB	AB	AB	AB	BB	NA	AA	NA	NA	NA	AB	AB	BB	BB	NA	AA	BB	AA	2	NA	AA	AB	BB	4	NA	AB	AB	AB	NA
175	AB	AB	NA	AA	AA	AA	NA	AB	3	NA	AA	AA	AB	NA	AA	AB	NA	AB	BB	AA	BB	AA	BB	AA	AB	NA	AA	NA	NA	NA	AB	AB	BB	AB	NA	AA	AB	AA	1	NA	AA	AB	BB	4	NA	AA	BB	AB	NA
176	AB	AB	NA	AA	AA	AA	NA	AA	3	NA	AA	AB	AB	NA	AB	AB	NA	BB	AB	AB	AB	AB	AA	BB	BB	NA	AB	NA	NA	NA	AB	AB	AB	BB	NA	AA	AB	AB	NA	NA	AA	AB	AB	4	NA	AB	BB	AA	NA
177	AA	AA	NA	AA	AB	AB	NA	AA	3	NA	AB	AB	AB	NA	AB	AB	NA	BB	BB	AB	AB	AB	AB	AB	BB	NA	AA	NA	NA	NA	AB	AB	AB	AB	NA	AA	AB	AB	3	NA	AB	AA	BB	2	NA	AB	BB	AB	NA
178	AA	AB	NA	AA	AA	AB	NA	AA	3	NA	AB	AB	AB	NA	AB	AA	NA	AA	BB	AA	BB	AA	BB	AA	AB	NA	AA	NA	NA	NA	AA	BB	AB	AB	NA	AB	BB	AA	2	NA	AB	AB	BB	4	NA	AB	AB	AB	NA
[truncated: 217 more columns]

## Sheet: _RQTL_inputfile_individuals92to
EggDiameter	SPzConcentration	SPzHeadDiameter	Oestradiol	Testosterone		sf001184_01CT	sf005459_AC	OGO-4UW	sf003994_GT	sf000978_02CT	sf003610_01AT	OMM-1195	sf005663_CT	D100	CA-345149	sf002131_AG	sf003063_01AC	sf004521_CG	SAL-9UoGiii	sf000505_CT	sf003500_02CT	OMI-30TUFii	sf004541_AC	sf000657_01CT	sf000554_CT	sf000810_03CT	sf004818_06CT	sf003520_AG	sf005168_AC	sf002033_01AG	OMY-RGT2TUFii	sf004016_01AT	OMM-1197i	BX-318599	OMM-1197ii	sf001288_CT	sf001644_01AG	sf002024_02AC	sf004560_GT	OMM5008	sf004774_AG	sf000179_01AC	sf004211_GT	D75	OMM-5007	sf000071_02CT	sf003105_01CT	sf000428_01AT	sfo262
						1	1	1	1	1	1	1	1	1	1	1	1	1	1	1	1	2	2	2	2	2	2	2	2	2	2	2	2	2	2	2	2	3	3	3	3	3	3	3	3	3	3	3	3
						0.000	4.570	36.766	53.258	55.887	68.507	70.547	83.011	90.854	91.594	92.107	103.134	118.629	125.706	130.778	132.256	0.000	16.909	26.750	40.090	40.184	40.184	62.669	64.218	72.215	78.199	87.518	97.857	112.425	128.232	130.231	130.231	0.000	8.059	10.072	30.924	31.636	34.666	38.512	44.814	49.174	69.648	70.649	74.236
4.88	NA	NA	81793.6	26.69	92	AB	AB	NA	AA	AA	AA	1	AB	3	4	AA	BB	AB	2	BB	AB	NA	AB	BB	AA	BB	AA	AB	AB	AB	AB	AB	4	4	AB	AB	AB	AB	BB	NA	AA	BB	AA	2	1	AA	AB	AB	4
3.35	NA	NA	232.17	13.49	93	AB	AB	NA	NA	AA	AA	1	AB	3	4	AA	AB	AB	1	AA	BB	4	AB	AB	AA	BB	AA	NA	AB	AB	AB	AB	4	4	BB	AB	AB	AB	BB	NA	AA	AA	AA	4	3	AB	AA	AB	2
NA	NA	2.87	NA	35.29	94	NA	NA	NA	NA	NA	NA	1	NA	4	3	NA	NA	NA	NA	NA	NA	1	NA	NA	NA	NA	NA	NA	NA	NA	AB	NA	4	3	AB	NA	NA	NA	NA	1	NA	NA	NA	2	1	NA	NA	NA	4
NA	22636.67	2.87	NA	22.24	95	AA	AA	NA	AB	AB	AB	1	AA	3	4	AB	AB	AB	2	AB	AB	3	AA	BB	AA	BB	AA	BB	NA	AB	NA	AA	3	2	AA	AA	BB	BB	AB	NA	AA	AA	AB	4	3	AB	AA	AB	1
NA	NA	2.92	NA	0.99	96	AB	AB	NA	NA	AA	AB	1	AB	3	4	AB	AB	AA	2	BB	BB	3	AB	BB	AA	BB	AA	NA	AB	AB	BB	NA	4	1	BB	AB	AB	AB	AA	NA	AB	AA	AA	4	NA	BB	AA	AB	1
NA	22460	2.89	NA	30.77	97	AB	AA	1	AB	AB	AA	1	AA	3	4	AA	AA	AB	1	AA	AB	3	AB	BB	AA	BB	AA	BB	AA	AB	BB	AA	1	3	AA	AB	AB	AA	AB	2	AB	AA	AB	4	3	BB	AA	AB	2
NA	68186.67	3.89	NA	22.09	98	AA	NA	1	NA	BB	BB	4	NA	1	1	NA	AB	AA	1	NA	AB	3	NA	BB	NA	BB	AA	NA	NA	AB	AB	NA	3	4	NA	NA	BB	AA	NA	4	AB	AB	NA	3	3	BB	AA	BB	4
NA	76426.67	3.84	NA	10.63	99	AA	AA	NA	BB	BB	BB	4	AA	2	1	AB	AB	AB	2	AB	AA	3	AA	BB	AA	BB	AA	BB	AA	AB	BB	AA	1	NA	NA	AA	BB	AA	AA	NA	AB	AB	AB	3	3	BB	AA	BB	2
3.9	NA	NA	8138.77	30	100	AA	AB	NA	AB	BB	BB	4	AB	1	NA	AB	AB	AA	2	BB	AB	NA	AB	AB	AA	BB	AA	BB	AA	AB	BB	AA	1	NA	NA	AB	AB	BB	BB	NA	AA	BB	AA	3	1	AA	AB	BB	4
5.89	NA	NA	330.71	9.43	101	AA	AB	NA	AA	AA	AB	NA	AA	4	NA	AB	AA	AA	NA	AA	AB	NA	AB	AB	AB	AB	AB	AA	BB	BB	NA	AB	NA	NA	NA	AA	BB	AA	AB	NA	AB	AB	AA	1	NA	AB	AB	AB	4
NA	16600	2.87	NA	23.07	102	AA	AB	NA	NA	AB	AB	NA	AB	4	NA	AB	AB	AA	NA	AA	BB	NA	AB	BB	AA	BB	AA	NA	AB	AB	NA	AB	NA	NA	NA	AB	AB	BB	BB	NA	AA	AB	AA	1	NA	AA	AB	AB	4
NA	71016.67	3.9	NA	38.22	103	AA	AA	NA	AB	AB	AB	NA	AA	4	NA	AB	AA	AA	NA	AA	AB	NA	AB	BB	AB	AB	AB	AB	AB	BB	NA	AA	NA	NA	NA	AA	BB	AB	BB	NA	AA	AB	AA	1	NA	AA	AB	AB	4
3.98	NA	NA	3504.39	8.45	104	AA	AB	NA	AB	AB	AB	NA	AA	3	NA	AB	AB	AB	NA	AB	AB	NA	AB	AB	AA	BB	AA	AB	AB	AB	NA	AB	NA	NA	NA	AB	AB	AB	AA	NA	AB	BB	AA	2	NA	AB	AB	BB	4
3.94	NA	NA	481.18	10.84	105	AB	AB	NA	NA	AB	AB	NA	AB	1	NA	AA	AB	AB	NA	AA	BB	NA	BB	AB	AB	AB	AB	NA	AB	BB	NA	AB	NA	NA	NA	AB	AB	AA	AB	NA	AB	AB	AB	1	NA	AB	AB	AB	4
3.88	NA	NA	231.02	12.26	106	NA	AB	NA	AA	NA	NA	NA	AA	4	NA	AA	NA	AA	NA	AA	NA	NA	BB	NA	AB	NA	NA	AA	BB	NA	NA	NA	NA	NA	NA	AB	NA	NA	AB	NA	AA	NA	AB	2	NA	NA	NA	NA	4
NA	74626.67	3.9	NA	56.42	107	AA	AA	NA	AB	AB	AB	NA	AA	3	NA	AB	AB	AA	NA	AB	AB	NA	AB	AB	AB	AB	AB	AB	AB	BB	NA	AA	NA	NA	NA	AA	BB	BB	AB	NA	AA	AB	AA	1	NA	AA	AB	AB	4
NA	25533.33	2.88	NA	9.13	108	AA	AA	NA	BB	BB	BB	NA	AB	1	NA	AB	AA	AA	NA	AA	AB	NA	AB	BB	AB	AB	AB	AB	AB	BB	NA	AA	NA	NA	NA	AA	BB	BB	AB	NA	AA	AB	AA	1	NA	AA	AB	BB	4
NA	39833.33	3.91	NA	50.06	109	AA	AA	NA	NA	AB	AB	NA	AA	4	NA	AB	AB	AA	NA	AA	AA	NA	AB	AB	AB	AB	AB	NA	AB	BB	NA	AA	NA	NA	NA	AA	BB	AB	AB	NA	AB	AB	AB	3	NA	BB	AA	AB	1
NA	20853.33	2.88	NA	10.31	110	AB	AB	NA	AA	AA	AA	NA	AA	3	NA	AA	AB	AB	NA	BB	BB	NA	AA	AB	AA	BB	AA	BB	AB	AB	NA	AB	NA	NA	NA	AA	BB	AB	BB	NA	AA	BB	AA	2	NA	AA	AB	BB	4
3.93	NA	NA	369.46	16.78	111	AA	AA	NA	BB	BB	BB	NA	AA	NA	NA	AB	BB	AA	NA	BB	AB	NA	AB	AB	AB	AB	AB	AA	BB	BB	NA	AB	NA	NA	NA	AA	BB	BB	AB	NA	AA	AB	AB	NA	NA	AB	AA	AB	1
NA	NA	NA	21077.9	34.44	112	AB	AB	NA	AA	AA	AB	NA	AA	4	NA	AB	AA	AA	NA	AA	AB	NA	AB	BB	AA	BB	AA	AB	AB	AB	NA	AA	NA	NA	NA	AB	AB	AB	BB	NA	AA	AB	AA	3	NA	AB	AA	AB	2
3.91	NA	NA	282.29	15.28	113	AA	AB	NA	AB	AB	BB	NA	AA	1	NA	AB	AB	AA	NA	AA	AA	NA	AB	BB	AB	AB	AB	AA	BB	BB	NA	AB	NA	NA	NA	AA	BB	BB	AB	NA	AA	AB	AA	1	NA	AA	AA	AB	4
3.85	NA	NA	239.17	8.37	114	AB	AB	NA	AA	AA	AA	NA	AB	3	NA	AA	AB	AB	NA	AA	BB	NA	AB	BB	AB	AB	AB	AB	AB	BB	NA	AA	NA	NA	NA	AA	BB	AB	AA	NA	AB	AB	AA	3	NA	BB	AA	BB	4
3.96	NA	NA	3071.64	68.89	115	AB	AB	NA	AA	AA	AA	NA	AA	4	NA	AA	AB	AA	NA	AA	AA	NA	AA	AB	AA	BB	AA	AB	AB	AB	NA	AB	NA	NA	NA	AA	BB	AB	AA	NA	AB	AB	AA	1	NA	AB	AB	AB	4
4.3	NA	NA	4287.76	NA	116	AB	AA	NA	BB	BB	AB	NA	AB	2	NA	AA	AB	AB	NA	AA	AB	NA	AA	AB	AB	AB	AB	AB	AB	BB	NA	AA	NA	NA	NA	AA	BB	AB	BB	NA	AA	AA	AA	4	NA	AB	AA	AB	2
NA	68476.67	3.83	NA	NA	117	AA	AA	NA	BB	BB	AB	NA	AB	1	NA	AA	AB	AA	NA	AA	AA	NA	AA	BB	AA	BB	AA	BB	AA	AB	NA	AA	NA	NA	NA	AA	BB	AB	AB	NA	AA	AB	AB	1	NA	AA	AB	AB	4
NA	75103.33	3.86	NA	10.34	118	AB	AB	NA	AB	AB	AB	NA	AB	2	NA	AA	AB	AB	NA	AB	AA	NA	AB	AB	AB	AB	AB	AB	AB	BB	NA	AA	NA	NA	NA	AA	BB	BB	AB	NA	AA	AB	AB	1	NA	AA	AB	AB	4
3.85	NA	NA	710.51	6.21	119	AA	AA	NA	AB	AB	AB	NA	AB	NA	NA	AB	AB	AA	NA	BB	BB	NA	AA	AB	AA	BB	AA	AB	AB	AB	NA	AB	NA	NA	NA	AA	BB	AB	AB	NA	AA	AA	AB	4	NA	AB	AA	AB	2
NA	83133.33	3.87	NA	18.56	120	AB	AB	NA	AA	AA	AB	NA	AA	4	NA	AB	AA	AA	NA	AA	AB	NA	AB	AB	AA	BB	AA	AB	AB	AB	NA	AB	NA	NA	NA	AB	AB	AB	AB	NA	AA	AB	AA	1	NA	AA	AB	AB	4
4.03	NA	NA	194.57	9.27	121	AB	AB	NA	AB	AB	AB	NA	AA	1	NA	AA	AA	AA	NA	AA	AB	NA	AB	BB	AA	BB	AA	BB	AA	AB	NA	AA	NA	NA	NA	AB	AB	AA	AA	NA	AB	AB	AA	1	NA	AB	AB	BB	4
NA	34233.33	2.85	NA	43.97	122	AB	AB	NA	AA	AA	NA	NA	AB	4	NA	AB	AB	AA	NA	AA	BB	NA	AA	AB	AA	BB	AA	BB	AA	AB	NA	AB	NA	NA	NA	AA	BB	AA	AA	NA	AB	AA	AA	4	NA	BB	AA	AB	2
3.94	NA	NA	6059.18	5.95	123	AA	AA	NA	AB	AB	AB	NA	AA	3	NA	AB	AB	AB	NA	AB	AB	NA	AA	AB	AA	BB	AA	BB	AA	AB	NA	AA	NA	NA	NA	AA	BB	AB	BB	NA	AA	AB	AA	3	NA	AB	AA	BB	2
4.14	NA	NA	6081.54	3.04	124	AA	AA	NA	BB	BB	BB	NA	AB	1	NA	AB	AB	AA	NA	AA	AB	NA	AA	AB	AA	BB	AA	AB	AB	AB	NA	AB	NA	NA	NA	AA	BB	AA	AA	NA	AB	BB	AA	2	NA	AB	AB	BB	4
3.92	NA	NA	334.53	9.97	125	AB	AB	NA	AA	AA	AA	NA	AB	4	NA	AA	AB	AA	NA	AA	BB	NA	AB	AB	AB	AB	AB	AB	AB	BB	NA	AA	NA	NA	NA	AA	BB	AB	BB	NA	AA	AA	AA	3	NA	AB	AA	BB	2
NA	21333.33	2.84	NA	20.45	126	AB	AB	NA	AB	AB	BB	NA	AB	2	NA	AB	AB	AB	NA	BB	BB	NA	AA	AB	AA	BB	AA	BB	AA	AB	NA	AB	NA	NA	NA	AA	BB	AB	BB	NA	AA	AA	AB	4	NA	AB	AA	BB	NA
NA	51270	2.85	NA	7.61	127	AB	AB	NA	AB	AB	AB	NA	AA	4	NA	AA	BB	AB	NA	AA	AB	NA	AB	AB	AA	BB	AA	AB	AB	AB	NA	AB	NA	NA	NA	AB	AB	AB	BB	NA	AA	AA	AB	4	NA	AB	AA	AB	2
NA	74650	3.87	NA	5.53	128	AB	AB	NA	AA	AA	AA	NA	AB	2	NA	AA	AB	AA	NA	AA	BB	NA	BB	AB	AB	AB	AB	AA	BB	BB	NA	AB	NA	NA	NA	AB	AB	AA	AB	NA	AB	AA	AB	3	NA	BB	AA	AB	2
6.16	NA	NA	NA	NA	129	AB	AB	NA	AB	AB	AB	NA	AB	2	NA	AA	BB	AB	NA	BB	AB	NA	BB	AB	AB	AB	AB	AB	AB	BB	NA	AA	NA	NA	NA	AB	AB	AA	AA	NA	AB	AB	AA	2	NA	BB	AA	BB	4
4.16	NA	NA	8859.97	2.88	130	AB	AB	NA	AB	AB	NA	NA	AB	4	NA	AA	BB	AB	NA	BB	AB	NA	AA	BB	AA	BB	AA	AB	AB	AB	NA	AB	NA	NA	NA	AA	BB	AB	AB	NA	AA	BB	AB	3	NA	AA	AB	BB	1
NA	65356.67	2.85	NA	3.23	131	AA	AA	NA	NA	AB	AB	NA	AB	4	NA	AB	AB	AA	NA	BB	BB	NA	AA	BB	AA	BB	AA	AB	AB	AB	NA	AB	NA	NA	NA	AA	BB	BB	BB	NA	AA	AB	AB	4	NA	AB	AA	BB	1
NA	88760	3.9	NA	8.17	132	AA	NA	NA	NA	AB	AB	NA	NA	4	NA	NA	AA	AA	NA	NA	AB	NA	NA	BB	NA	BB	AA	NA	NA	AB	NA	AA	NA	NA	NA	NA	BB	AB	NA	NA	AB	AA	NA	1	NA	BB	AB	AB	4
NA	28890	2.87	NA	15.61	133	AB	AB	NA	AA	AA	AA	NA	AB	2	NA	AA	AB	AA	NA	AA	BB	NA	AB	BB	AA	BB	AA	AB	AB	AB	NA	AB	NA	NA	NA	AB	AB	AB	AA	NA	AB	AB	AA	4	NA	AB	AB	AB	2
NA	70930	2.89	NA	11.79	134	AB	AB	NA	AB	AB	AB	NA	AA	4	NA	AA	AB	AB	NA	AB	AB	NA	AA	BB	AA	BB	AA	BB	AA	AB	NA	AA	NA	NA	NA	AA	BB	AB	BB	NA	AA	AA	AA	4	NA	AB	AA	BB	NA
3.9	NA	NA	85933.8	33.89	135	AA	AB	NA	AA	AA	AB	NA	AB	1	NA	AB	AB	AA	NA	AB	AB	NA	BB	BB	AB	AB	AB	AB	AB	BB	NA	AA	NA	NA	NA	AB	AB	AA	AB	NA	AB	AA	AB	4	NA	BB	AA	AB	2
NA	85676.67	2.85	NA	13.64	136	AB	AB	NA	AB	AB	BB	NA	AA	2	NA	AB	AB	AA	NA	AA	AA	NA	AB	AB	AB	AB	AB	AB	AB	BB	NA	AA	NA	NA	NA	AA	BB	AA	AB	NA	AB	AA	AB	3	NA	BB	AA	AB	2
4.19	NA	NA	336.77	NA	137	AB	AB	NA	AB	AB	BB	NA	AA	2	NA	AB	AB	AB	NA	AB	AA	NA	BB	AB	AB	AB	AB	AA	BB	BB	NA	AB	NA	NA	NA	AB	AB	AA	AB	NA	AB	AB	AB	3	NA	BB	AA	AB	1
NA	74253.33	3.87	NA	8.45	138	AB	AB	NA	AB	AB	NA	NA	AA	1	NA	AA	AB	AB	NA	AB	AA	NA	BB	AB	AB	AB	AB	AB	AB	BB	NA	AA	NA	NA	NA	AB	AB	AB	AB	NA	AB	AB	AB	4	NA	BB	AA	AB	1
NA	31590	2.84	NA	18.05	139	AA	AB	NA	BB	BB	BB	NA	AA	1	NA	AB	AA	AA	NA	AA	AB	NA	AB	BB	AA	BB	AA	AB	AB	AB	NA	AB	NA	NA	NA	AB	AB	AB	AA	NA	AB	AA	AB	4	NA	BB	AA	AB	1
3.69	NA	NA	185.8	NA	140	AA	AB	NA	AA	AA	AB	NA	AA	3	NA	AB	AB	AB	NA	AB	AB	NA	AA	BB	AA	BB	AA	BB	AA	AB	NA	AA	NA	NA	NA	AA	BB	BB	AB	NA	AA	AB	AB	1	NA	AA	AB	AB	4
3.87	NA	NA	178.95	9.33	141	AB	AB	NA	AA	AA	AA	NA	AB	3	NA	AA	AB	AB	NA	BB	BB	NA	AB	BB	AA	BB	AA	AB	AB	AB	NA	AB	NA	NA	NA	AB	AB	BB	BB	NA	AA	BB	AA	2	NA	AA	AB	BB	4
6.23	NA	NA	230.62	9.76	142	AB	AB	NA	AB	AB	AB	NA	AB	1	NA	AA	AB	AA	NA	AA	AA	NA	AB	AB	AB	AB	AB	AB	AB	BB	NA	AA	NA	NA	NA	AA	BB	AB	AA	NA	AB	BB	AA	2	NA	AB	AB	BB	4
3.97	NA	NA	451.18	13.34	143	AB	AB	NA	NA	AA	AA	NA	AB	4	NA	AA	AB	AA	NA	AA	BB	NA	AB	AB	AA	BB	AA	NA	AA	AB	NA	AA	NA	NA	NA	AB	AB	AA	AA	NA	AB	BB	AA	2	NA	AB	AB	BB	4
4.1	NA	NA	9822.49	1.09	144	AB	AB	NA	AB	AB	BB	NA	AB	1	NA	AB	AB	AA	NA	AA	AB	NA	AB	AB	AA	BB	AA	AB	AB	AB	NA	AB	NA	NA	NA	AB	AB	AB	AB	NA	AA	AB	AB	1	NA	AA	AB	AB	4
NA	35836.67	2.87	NA	24.32	145	AA	AB	NA	AA	AA	AB	NA	AA	4	NA	AB	AA	AA	NA	AA	AB	NA	AB	BB	AB	AB	AB	AA	BB	BB	NA	AA	NA	NA	NA	AA	BB	BB	BB	NA	AA	AB	AA	3	NA	AB	AA	BB	1
NA	74320	3.87	NA	3.22	146	NA	AA	NA	NA	NA	NA	NA	AA	3	NA	AB	NA	AB	NA	NA	NA	NA	AA	NA	AA	NA	NA	AB	AB	NA	NA	NA	NA	NA	NA	AA	NA	NA	AA	NA	AB	NA	AA	2	NA	NA	NA	NA	4
NA	59716.67	2.85	3705.28	2.33	147	AB	AB	NA	AA	AA	AA	NA	AA	3	NA	AA	AB	NA	NA	NA	AB	NA	BB	AB	AB	AB	AB	AB	AB	BB	NA	AA	NA	NA	NA	AB	AB	AA	AA	NA	NA	AA	AB	3	NA	BB	AA	BB	2
NA	30856.67	2.87	NA	5.98	148	AB	AB	NA	AA	AA	AA	NA	AB	3	NA	AA	AB	AB	NA	AB	AB	NA	AA	BB	AA	BB	AA	AB	AB	AB	NA	AA	NA	NA	NA	AA	BB	AB	AA	NA	AB	AB	AA	3	NA	BB	AA	BB	1
4.07	NA	NA	239.24	13.65	149	AB	AB	NA	AB	AB	AB	NA	AB	1	NA	AA	AB	AA	NA	AA	BB	NA	BB	BB	AB	AB	AB	AB	AB	BB	NA	AA	NA	NA	NA	AB	AB	AB	NA	NA	NA	AB	NA	1	NA	AB	AB	AB	4
NA	30290	2.85	NA	22.72	150	AB	AB	NA	AA	AA	AA	NA	AA	3	NA	AA	AB	AB	NA	AB	AA	NA	AA	BB	AA	BB	AA	AB	AB	AB	NA	AA	NA	NA	NA	AA	BB	BB	AB	NA	AA	BB	AB	1	NA	AA	AB	AB	4
NA	73866.67	3.86	NA	38.64	151	AB	AB	NA	NA	AB	AB	NA	AA	1	NA	AA	AB	AA	NA	AA	AA	NA	BB	BB	AB	AB	AB	AB	AB	BB	NA	AA	NA	NA	NA	AB	AB	BB	BB	NA	AA	BB	AA	2	NA	AA	AB	AB	4
NA	36246.67	2.91	NA	25.5	152	AA	AA	NA	AB	AB	AA	NA	AA	4	NA	AA	AB	AA	NA	AA	AA	NA	AB	AB	AA	BB	AA	BB	AA	AB	NA	AA	NA	NA	NA	AB	AB	AA	AA	NA	AB	BB	AA	2	NA	AB	AB	BB	4
3.95	NA	NA	8555.53	3.48	153	AB	AB	NA	NA	AA	AA	NA	AB	4	NA	AA	AB	AA	NA	AA	BB	NA	AB	BB	AB	AB	AB	AA	BB	BB	NA	AA	NA	NA	NA	AA	BB	AB	BB	NA	AA	AB	AA	1	NA	AA	AB	BB	4
4.12	NA	NA	274.94	16.86	154	AA	AA	NA	NA	AB	AB	NA	AB	4	NA	AB	AB	AA	NA	AA	BB	NA	AB	AB	AA	BB	AA	BB	AA	AB	NA	AA	NA	NA	NA	AB	AB	AA	AB	NA	AB	AB	AB	3	NA	BB	AA	AB	2
3.95	NA	NA	6464.25	1.6	155	AB	AB	NA	NA	AA	AA	NA	AA	4	NA	AA	AB	AA	NA	AA	AA	NA	AB	BB	AA	BB	AA	NA	AB	AB	NA	AA	NA	NA	NA	AB	AB	AB	AB	NA	AB	AB	AB	3	NA	BB	AA	BB	1
4.23	NA	NA	258.33	NA	156	AA	AA	NA	BB	BB	BB	NA	AB	1	NA	AB	AB	AA	NA	AA	AA	NA	AA	BB	AA	BB	AA	BB	AA	AB	NA	AA	NA	NA	NA	AA	BB	AB	AA	NA	AB	AB	AA	2	NA	AB	AB	BB	4
NA	80356.67	2.86	NA	22.78	157	AA	AB	NA	NA	AB	AB	NA	AB	4	NA	AB	AB	AA	NA	AA	BB	NA	BB	AB	AB	AB	AB	AA	BB	BB	NA	AB	NA	NA	NA	AB	AB	AA	AA	NA	AB	BB	AA	2	NA	AB	AB	BB	4
NA	42926.67	2.87	NA	48.66	158	AB	AB	NA	AA	AA	AA	NA	AA	4	NA	AA	AB	AA	NA	AA	BB	NA	AA	AB	AA	BB	AA	BB	AA	AB	NA	AA	NA	NA	NA	AA	BB	BB	AB	NA	AA	AB	AB	1	NA	AA	AB	AB	4
NA	73033.33	2.86	NA	23.3	159	AA	AA	NA	AB	AB	AA	NA	AA	3	NA	AA	AB	AB	NA	NA	AB	NA	AB	BB	AA	BB	AA	BB	AA	AB	NA	AA	NA	NA	NA	AB	AB	BB	BB	NA	AA	AB	AB	3	NA	AB	AA	BB	1
NA	76956.67	2.89	NA	43.43	160	AA	AA	NA	AB	AB	AB	NA	AB	4	NA	AB	AA	AA	NA	AA	AB	NA	BB	AB	AB	AB	AB	AB	BB	BB	NA	AB	NA	NA	NA	AB	AB	BB	BB	NA	AA	BB	AA	2	NA	AA	AB	BB	4
NA	32140	2.83	NA	14.92	161	AA	AB	NA	AA	AB	AB	NA	AA	3	NA	AB	AB	AA	NA	AB	AB	NA	AB	AB	AA	BB	AA	AB	AB	AB	NA	AB	NA	NA	NA	AB	AB	BB	AB	NA	AA	AB	AB	3	NA	AB	AA	BB	1
6.02	NA	NA	NA	44.73	162	AB	AA	NA	NA	BB	AB	NA	AA	2	NA	AA	BB	AB	NA	AA	AB	NA	BB	BB	AB	AB	AB	AB	AB	BB	NA	AA	NA	NA	NA	AB	AB	AB	AB	NA	AA	AB	AA	1	NA	AA	AB	AB	4
3.92	NA	NA	386.67	9.41	163	AB	AA	NA	NA	AA	AA	NA	AA	3	NA	AA	AB	NA	NA	AB	AB	NA	AA	AB	AA	BB	AA	NA	AB	AB	NA	NA	NA	NA	NA	AA	BB	AB	AB	NA	AA	BB	AB	2	NA	AA	AB	BB	4
NA	24116.67	2.9	NA	3.41	164	AB	AA	NA	AA	AA	AA	NA	AB	3	NA	AA	AB	AB	NA	BB	AB	NA	AB	AB	AB	AB	AB	AA	BB	BB	NA	AB	NA	NA	NA	AA	BB	BB	BB	NA	AA	AB	AA	4	NA	AB	AA	AB	1
NA	29373.33	3.87	NA	4.74	165	AB	AB	NA	NA	AA	AB	NA	AB	NA	NA	AB	AB	AA	NA	AA	AB	NA	AB	AB	AA	BB	AA	NA	AB	AB	NA	AB	NA	NA	NA	AB	AB	BB	AB	NA	AA	AA	AB	NA	NA	AB	AA	BB	1
NA	NA	NA	2940.27	2.08	166	AB	AB	NA	AB	AB	AB	NA	AA	2	NA	AA	AB	AB	NA	AB	AA	NA	BB	AB	AB	AB	AB	AB	AB	BB	NA	AA	NA	NA	NA	AB	AB	AB	AB	NA	AA	BB	AB	2	NA	AA	AB	AB	4
NA	64853.33	2.84	NA	17.52	167	AB	AA	NA	NA	AB	AA	NA	AA	4	NA	AA	AA	AA	NA	AA	AB	NA	AB	AB	AA	BB	AA	AB	AB	AB	NA	AB	NA	NA	NA	AB	AB	AA	AA	NA	AB	BB	AB	2	NA	AB	AB	AB	4
NA	100646.67	4.57	NA	36.62	168	AB	AB	NA	AA	AA	AB	NA	AA	4	NA	AB	AB	AA	NA	AA	AA	NA	AB	AB	AA	BB	AA	AB	AB	AB	NA	AB	NA	NA	NA	AB	AB	AA	AB	NA	AB	AB	AB	3	NA	BB	AA	BB	2
3.95	NA	NA	154.35	12.63	169	AA	AA	NA	NA	BB	BB	NA	AB	1	NA	AB	AB	AA	NA	AA	AB	NA	AA	AB	AA	BB	AA	BB	AA	AB	NA	AA	NA	NA	NA	AA	BB	AB	BB	NA	AA	AA	AA	4	NA	AB	AA	AB	2
NA	NA	NA	3652.19	21.32	170	AB	AB	NA	NA	AA	AB	NA	AB	3	NA	AB	AB	AB	NA	AA	AB	NA	AA	BB	AB	AB	AB	NA	AB	BB	NA	NA	NA	NA	NA	AB	BB	BB	AA	NA	AA	BB	AA	2	NA	AA	AB	BB	4
4	NA	NA	NA	NA	172	AA	AA	NA	NA	AB	AB	NA	AA	4	NA	AB	AA	AA	NA	AA	AB	NA	AB	AB	AB	AB	AB	AB	AB	BB	NA	AA	NA	NA	NA	AA	BB	BB	BB	NA	AA	BB	AA	2	NA	AA	AB	BB	4
3.8	NA	NA	362.21	20.66	173	AA	AA	NA	BB	BB	AB	NA	AB	1	NA	AA	AB	NA	NA	AA	BB	NA	BB	AB	AB	AB	AB	AB	AB	BB	NA	AA	NA	NA	NA	AB	AB	BB	AB	NA	AA	AB	AB	3	NA	AB	AA	BB	1
6.05	NA	NA	388.53	14.59	174	AA	AB	NA	AA	AA	AB	NA	AB	4	NA	AB	AA	AA	NA	AB	AB	NA	BB	BB	AB	AB	AB	AB	AB	BB	NA	AA	NA	NA	NA	AB	AB	BB	BB	NA	AA	BB	AA	2	NA	AA	AB	BB	4
NA	83483.33	2.81	345.52	12.15	175	AB	AB	NA	AA	AA	AA	NA	AB	3	NA	AA	AA	AB	NA	AA	AB	NA	AB	BB	AA	BB	AA	BB	AA	AB	NA	AA	NA	NA	NA	AB	AB	BB	AB	NA	AA	AB	AA	1	NA	AA	AB	BB	4
3.65	NA	NA	NA	0.56	176	AB	AB	NA	AA	AA	AA	NA	AA	3	NA	AA	AB	AB	NA	AB	AB	NA	BB	AB	AB	AB	AB	AA	BB	BB	NA	AB	NA	NA	NA	AB	AB	AB	BB	NA	AA	AB	AB	NA	NA	AA	AB	AB	4
NA	75800	2.85	5342.89	0.85	177	AA	AA	NA	AA	AB	AB	NA	AA	3	NA	AB	AB	AB	NA	AB	AB	NA	BB	BB	AB	AB	AB	AB	AB	BB	NA	AA	NA	NA	NA	AB	AB	AB	AB	NA	AA	AB	AB	3	NA	AB	AA	BB	2
NA	89366.67	2.85	NA	17.43	178	AA	AB	NA	AA	AA	AB	NA	AA	3	NA	AB	AB	AB	NA	AB	AA	NA	AA	BB	AA	BB	AA	BB	AA	AB	NA	AA	NA	NA	NA	AA	BB	AB	AB	NA	AB	BB	AA	2	NA	AB	AB	BB	4
[truncated: 222 more columns]
