# Supplementary material for: Coding Gene Single Nucleotide Polymorphism Mapping and Quantitative Trait Loci Detection for Physiological Reproductive Traits in Brook Charr, Salvelinus fontinalis
Source: G3 (Bethesda). 2012 Mar 1;2(3):379–92. doi: 10.1534/g3.111.001867 (PMC3291508; doi:10.1534/g3.111.001867)
Supplement: Supporting Information [file supp_2.3.379_TableS4.xlsx]

## Sheet: Sheet1
TABLE S 4. Sequences of the contig build from the assembly of the 454 raw data
	SNP name	Total sequence of the Contig
1	sf000002_01AG	GGGGCACTGTAGCCCACAAGGCCTTCGTGGAAGTGAACGAGAGAGGCACAGAGGCAGGTGCGTCCACAGTGGCAGACGGCATAATGTACGGTTTAAGTAACAAGCATTACTTCACGGCAGACCACCCCTTTATTTTCTTCATTAGACACAACCAGACCCAATCCATTCTGTTTCTGGGCAGGTTCTCCTCACCTGAGGAGGGTGACAGGGAGGGAAGATCTCTGTAGGAAGGGAAAATAATGTTTTGAAAAACATGTTATGTAATGCAAGAGAGCCCTTCACAGTTTAGTTGATTATTGTTGATCTTGTGTACCGAGTCTGTATTTGACCTTTGCTACGTGGATAGTGCTGTTATGTATTGTTATGTAATATAGCTCTCTTGTGCTTATAGTTTGTGAA…
2	sf000017_01CT	ACATCAATAAAGAAGATGAGGACGAGAGAAATGTATCTGTTGCTACTGACAACATTCAGTGATGAATTGAAAAAGCTTACAGAGGAACAGGCATATTCAGAGATGTTGAAATTGCAAAGGGATTCATAGGAATTGCCAATCGACATTTGTTGCTTCAGTTGTGTGCTGTAGGAAACGGTAAGGAAAAATACATTATTAGTTTACAAATGATACCTTGTGTGTCTCAATGTCTTACAACCTGCACTGTGCAAGACAGCACTGAACCCACCTGTTAAATCCAGCACAAAGTTGTTTCTCTGCAAAAGAGAACATAAAAACAATAGTTCTTCAGACACAAATCCTAAATTGCCAATCTGATTCAAGAAAATGTCAATTGCACAGCTAGCATCAACTTACCAT…
3	sf000021_01AG	TATGCCTCTGTCAGCCTGGTTATCACAACACTTTTTCATCTTTACTGCCTTGTGTCAGGTCTGTCCATCCAGTAGGAGACACTGCTTGTCTGAACACCACTAGTTTATGACCCGGTGTGAACAGTGTCCACGCGCTGGTCGTTATCGCTTCATAAAACTCTTATTACCAGCTCCGCTTGTTTCTTGCCAGTCCTCTAAGCAAAGTAAAAACACTCACACTGCTCTCCATCGAAAACAATGCTCTAAGTAAACTCTGGCTCAGGTTATGGCCAGATGCATCTATCGATATCAAATAACTGTCTTAGTAGCCAGACAGAATAAAAGTTTGATGAAACAATTCAGTAAATTGTGGCAAATTCTATTGAATTTGCCATAATGACCTCTAGCCACCTCGGAGTT…
4	sf000023_02AC	GAAATCTACAAAGCATATGATACAATACACAGCAGAGTCTGCTATAGCTCTGTACTACCGTATCAAAACATTGCCTTCTAGCGCCAGATTCAGAACGGCTTGAATAACAACCTCCTCACATCCTTTCATCTTGGCTTCTTTCATTAGCAGTAAAATATGCAACCAATCCGATTGATTGGTTAATAGATGTATATGTCTGCCATATAGCAAAATATGAAACTGGAACAATTTAAGATTCCCAACAAACTTCTGACAGGCTGGATATTTTATGAGACACTCTGACAAAGTTGAGAGGGTTCCAGTGCCTATTGCTGGGCTTTGAGGCCATTTTGAGTGACAGCATGTTTACTGGAAGGTATCTGTTCCATAATCCTCTCTGTGGTCATTGATCTTTCTCTT…
5	sf000032_01CT	CATGTTTTCCCTTTCATATTGGTAATCGTATTTGAATGCATAAATTATGATTATGACTTTAATTTTAGCACCCAACAACCTTATAAAGATTTAGCTCTATGCTATATTATGTAAGGCGTCCCTGTTGAATTATCAATCGGAAGAAATGAACCACAAAATTGAAACAATGTGCAATACATACTGTATTTGCATTGTTACATACAGTAATACAGTAATAGTGTGTGTGATAAAGAAGGGTGTGCCACCCTGAGCCCAGACTCACATCACAGTGTTCAGTCAGGCAGAGCTCAATAATGGTGCCACCCTGTCTCGCCTTCCTATAATATACTCTCCACACGCTCTATTGAGAGGAAGGGCTGGGCGGCCTGCCATGTGATCTATTCCACTACTGCCCATTCA…
6	sf000071_02CT	CTTTTTTGGTTTTTAAACATAGGCTATGCTGTTTTAGCAGAATCAACATGTAGAACAGTTAGAAAAGTAACAGAACGTCAGCCGATATTCTTGTCAGAGGCACTTGGTTGCAATCTGCTGTCCATCATTCAGTGTTGTACTTTAGGCCTACACCCAAGCTACACCACAGATTAGGCCTAGACAACGTTTTTGTGTGAGGAAGCTCTATGTCAGTTGTTCAGCATATATGTTGAAAGAAAATTGGAAAGCAATTTCAGCACACTCTTAGTACCTGTGATTTGGTGTTTTCTAAAATACGCCAAACTTGGCTAGGCTTATTTCCAAGTTGAATACAGTGCCGCTGTGGTCTATTGAATCGATATTGTGTCGAGAGCCGCAGTGGGACTCGGAGGAGAGCGA…
7	sf000078_02AG	ATATGAAATATGAAATGTGGTGGCTGTGTTTAGTCTAGACTAGAGGGTAGCTCCGGGTAACTCATCACTTTGATTCAGGTGGCATTTTCCTTTTTTCACATCATATTGTATGACCTATTTTCGAAATGAAGAAACCAAAATAGGATGAATTATACAATGGGCCACATTAACATACACCTGTGTAAACTTTTCACCTGTTATTAGACCTACAGAAGAAAATAAAATAAGCAAGTAACTAAAATAAATAGGCTACCGCTTAAAACCCTTTCCCTAATATGTATTCCCTATTTAATCGTTTTTTTTCTACCTTCCATGATAATAATCCGTAAAAATGTTGCATTGAGCTACTGGGTTGAAAACTAATGGACTTGGCTCGAGGTCGGTGCTGTGTTTGTCATA…
8	sf000086_01CT	TTTTTTACCGAGCTCCGCACCAAACTTCACAAAGATTGTGAAAAAACAAGTTTACAGTCATTACTATTACTGTTTTTATTTGTTCAAGATATAAGAACTTTCCTGTGACTGGAAAAATAATTGGATCATTTATTTCGGCATGTCCATGCGAAGTCGTGACACAAAAGAAAGGAAAAAGCTAGCCGTTCTATTGCTAATCAACAAGAGAGAAACGTGCTTATAGACAACTGCCATAACTACGCTTGCCCTATGGATAATATCATGCTTTCGAATGCTGTTGAAGATGACGAATTCCCCTCTTTACCGGTTACTCCGCGCAAACCTCTACCCTCCAAAAAAACCAACATGAACTCTGACATTGTGGCAACCCTCTCCTTACTCATCAACTCCAGGTCTGAC…
9	sf000088_01AC	GGGGAGGTATGTAACCATACAAAACACAAAATGTTGGAGACAAATGCATCAATTCATTTCATAACAGTTTCATAACAGAGTGGTTTTCTGTAAGCCTGTATCAAGGCCTGGTTTGAATGCAGGTGCACAGATCTCATTTCCCACAATGAGATTGACTACAGACGTATCTAGAATACCTCTGAATAACGACAATAACGGTCAGTTATCAAGGCATATCATGGGAGGAGAGAGAGAGACTTGATTATGGCATAATGTATGTTTATGCAGGATGGTGCATTGAAGAGAGGAAGGAGGGAGAAGCGTGAGAACAGAAAGAGAGAGCAAGAGCGAGAGCGAGAATGTAAATCTAATACGGCCAGAACAGAACAGAGAGGGTGGAAAAGACAGAGCAGAGCGCCA…
10	sf000119_01AG	GACAGTTACCAGGCTACACTGAACATTAGAGACCTCAGACATCAAAGCTGAACAGTGTGGTTACAGACAGTACTCTTCACCCCGTGTCATGTTGAACTCGTCATTGTCCCCACAAACAGTGTCCTAGGGAGAAACCGTGGCACTCCTGAAATGGTAATTAATTACAGCAGACTGAATACAGTAAAAGTACTGAATCTGTTCATTTGCATAGCAATGTACAGTAGATAGCAACAATAGCTGCTGTAAACAGAGCCAATTTTTCCAATGTCCCTTCTGGAACTTACTCCAAAGGATCCAAGTCCAACACAATCTGTAACAATCTGGTACCAGGTACCAAATGGTGCCAAGAGGAGTTTATGCTTTTTGTGTTCCTAAGCAGTGTTGGTAGACCGGTCTTCA…
11	sf000124_02CT	CGATTCTATTGATTCAGAGAACAGACGAGATTCAAACCACATCCAAGTAATGCATAATGAAGAGTGTCTTACAAGTGTAAATTCCCCTCCCTGGAATATTCGCGACTGATAATGGCCTGTGTGTATTATGAATTATAAGACAAAGGAATATGCCGATTGCTGTGCTTTATTCTATTCCTCACAGCTCTATTCAAGTTCATGAAGGGACAGGTGCTGTGTTTGGTCCCACAGGGACTCTAGAACATTTGAAAACACTATAATCATACAAATTCCTCTTCTTCCTACCTGTTCATGCCTTTTCACATTCACAGGTGCTACATGTCTCCCTTATTCCCTTTGCACCAGTTTGTTAGGCTGTGTAATCAACAACACAGTAACTTGCGAAGTGAAGGAAGAATC…
12	sf000137_01AG	AAACACTTCCAATGTGGTCCTTGACGGTAAAAACCATATCATTGATTGATATCATTATCAAACTTAGGCCTATAGGTCACCCAATATTCACAATTGCTCTCTTTGTAACTAATTTGGGTTTGGTTGTACATAGCCCATGCATTGAGGTATAGGCTACTGGAAAACATACCATAACATACCTTATGTCACCAATACAATTTATCCATCGAACATCATCTAATCAAACTGAAGAAAATGTACCGTATGACATAATGGTTAAATAAGACTAAACATAATTTGTTAAAAGGCTAACCATTTTTGATCATGTTAGCTGTCATTTAGTTAGATTAGTTCGAAACGCAATCACCGAGCAGAACAGAGTCATATAGTATAGGACTCCATGTCTCGTAATATGTGACT…
13	sf000139_01CG	TCAAATCCTCTTGCAGAGTCACATGCAGGTAAGATGCGTTGATGTTCTAGATATTATCGGACAGAGCAGATTCCCGAAGTTTCCAAAACACTGACCTTTGACAATAACTCTCAAGATTGAAGAGATGAGCTCTATTTCAAAATGTCACTTTTTTCAGAGAATAACCCCTGTTCCATACACTGGACATAATGAGCATGCGGCAGCAGACAGCCTACAATAACTTAATGAAAATGCCATTGTGTTCTTTTAAATGTTGTATTCATTTGTCCTAATGTTACGAAATACCCTTCATAAACACAACCAACTAGCATATATTAAATGTGTCTATTAGGCTTATACTTGAATGTTGCAGTCAAAAGGACCGCTCATTGGCTCAAAGCGGGGTCCCTCGAGGCCCTG…
14	sf000157_01AT	TTTCCCCAGATGGAGTCCATGAAGGTGGAGACGGCGTCATTCTTCAGTGGCCATGCCCAGGACCTGGCTACCCTGAGGGAGACCGCAACAGAAGGTCTCGGCTCCCTAAAGACTGAGCACGACAACCTGAAGGAACAGATCAGCAGAGCAGACAAGGAGCACCAAACGGTACAGCCTGGGATCTGCTTGGAGTTGTGTAGTCTAACGCAGTGGTGTCAGGCCATGGGAAAATATCGATATACTTTAAAATTACTAAAACGTAATTGAAACTGTCAAAATAATGGACTTAAGTTCAGTTTCTTCACTGTCCAGTTCGCTAATCATCATCACAAATGAAACCTAGACAGCGAGGGAGTATGAAATTACATAAACAATGGACTATTCTTTTTGGGCAAATGT…
15	sf000175_01CT	GGCAGCACCACTTTTCTGGTTGCAGTAGCTAAGGGAGGCTAAGGATGACAGACCCAGCACTTTTTTCTTTGTCAGAACTAGTAAAGAACACCATTATAAACCCATTAATTGAATTGGAAATTAGATAGAAGATCCTCTGGACCACAATATGCATAAAGGTATTGTTTGTGACTAAATCATACATTCCAGACGATTGGGCCAATTTCCCAAAGCAGCAACTGCATATACATTTTCAACCATTCAACTGATCTTCAACACCTTGATTAGAGTAATCTGTGTTTCTGTTGGGACAAACACCTGCAGTACTGCTGTGGCTCTCTTGGAGCAGGACTAAGGATCCCTGACAAAAACTAATTGAAAAAAAATGTCTCACCTATCTGGGGACTCTGGATCGAAGCA…
16	sf000178_01CT	CTCAACTCACGTCTCTGTAAGAGAACCATAAAACTCCCGTCCTGTCTGTCCCAGAGCCAATGCTGTACCTTGCCACTTTTCCTGGTAGAATTTACAGTTTTGCTTTACATTCCCCTGCAAGAATTAATTTACTGTTTAATTGTGTTGTTGTCAAGGCCCAGCATCGTATCTCAGTTTGTCCCAGACAAGCCTGAGATGAACTTGTGAGTGTCAATCCTTCAAGTCCACTTCAATTCCCATTCAAGCCCCTCTGGCTTGGTCACCATTGTGATTCCAGTATGTGGCGGCAGACTGAAGCAAGTCTAAGCTTGTGCATTCAATTCGACTTGATGACACAAATATGCCGAAGGAGGTTTTAGGCACAGCTGCATTGATCCACAGCTTAATTCGATTACACTC…
17	sf000179_01AC	GGGGGGAGGAGGAGGAAGGAAGAGGTTAGCTGGCCAACCTGAAAGGGTAGAGGGGACAGCAGTCAGCACTTGATTTTACTTCACCATATACTGTTAATTTGCACACACAAAGAAACAACAGGGATTTAAATAAAGCCTGTAATTTTGAAATAGACCATTGTGCTGATTCTTCTGAAGATCAGTGTTTTGTTTCTAGGCCTTCCAGTAGAGTTTGACAGGGCATTTTCTTATACCCTCATCAGCAAAAATAACCGCTGGGGAAAACCTTTCAAATACCTGTCTGCACAACCTGCATTGACACAGATGGAGAATGTCTAACTGCTGTCACTATAGCCCAATCTAAACAGACGACTGGGAGCCTCCATGACAAGAGGGAACAAATCTCCTCCGCTGTCTATC…
18	sf000191_01AG	ACACAGTGTGTACAGACAGGTCACACAGTGTGTACAGACAGGTCACACAGTGTGTACAGACAGGTCACACAGTGTGTACAGACAGGTCACACAGTGTGTACAGACAGGTCATACCAATAATGTGATGGTTCCATGTGATTCTGCTTAACCTCTTATCTGGCCTAACAGAAAACAAGACCTCTGTTTTACCGTGAGATTACTGGCATACTGGCTGCCTATCAAGTATCAGAAGTCATACTTCAAAATGTCTCTGTTCAAACCACAATACAAAGAAGTGCCAATCAAACGAACATGGATTCATGTCTCTTGACCTCACAGTGAAAGGTCACCTCCGTAATGTCATGTTGTAATTGAATTACTGTTAAGCAGAACAGATAACTATATGGCAGATAGAGGACA…
19	sf000209_01AG	TTCCCACGGTTCGACTGGTTTTGGAAACAGACCGGTCATGTTGATGGCAAACACAGCCTAAGTACTGGCACCATTTAACAAGAAAACTAAAAGCTTTTTCAAAAGCACAACAAACAACCGACCTGAGTCTTTTATCTTGGAGAATCTGAATACTGGCCCTTGGAGACATCTTAGTCAATGTCCTTTAGAGTGACCCATAAGGCAAATCTCTGTTCATTAGCCAGAGCCATTGTGACTTAAATGTCTCTGCTTGCGTAATCGTGATGACTCATTGAAATGTGGCGGGTTGAGAGAAAAACTGATCGGACCGACTCGTATCTCGCAGAGCCCAGCTAATGAATGCAGATGTGTCTATCTGTAATATGGAACTGCCGTTGATGTGTTTACGTCAACATTTTA…
20	sf000228_01AC	GGGGCTCAGTGTTAGCCACTGCAAAACAACATAAGGATTTGGACTTGTTGTATTATAATTTGGGCCAGGAGTTTCTTCTGTTCAGGTCACGTGGTCACTTGGTCAGGAAAATTATAATTGACCAGTTCCCTTTCTCTCGTAGCATTTAAGCTCGTAGAATAAAAAATCCACCTCTATCACAGTTAACACATTAACTATTTATTCCAAAAACGTAACACCATACAACAATTGTTCCCACCCTAAAAGTATTTTGTCATCAGAAAATAGGAAATATACTGTACCTGTGATTGGAGCATGTCATTCGAACAACAGTGGTTGATTGTGGGAACTTAACCATATATAATAGACTACCGTGTTGTTGGTAAGGAAACCTGACTCGACTGCTATGGTTGAATAAGT…
21	sf000230_01CG	TCCAGATTGTGTCAGAAACAGTTTTGAGAATCTGTCACGGAGTTTACCATTTGAAAAGGTGAGAGAAACTCATGGCTAGCAGACACCTTATTATATAATGTACATTGAAAGTAGCCTGGGTTGTGATATTTACGTTGTACTTATTTGATGGGAACCCTGTATTGCTGTATGGAAGGCTACTCTTGAATGCTGACTTTTCATTGGTTGGTGACGCTCATGGGAGTCAACACTACTTGAAAACTTTCAATCGTTGAAAGATAGGCTCGTCCCTTCCTTTCTAACTAAGAAGAAATCCATCAACGTGGATTCATCAATCCACCCATGCCACTTTGTAAATCACTCAAAACAACTACACGTGCACAATTGACATCCAATATGTTGCAAAATGCTGTTATTGAC…
22	sf000324_05AC	CTCATACCTCATCTTGGATATGATATTCATCCCATTGTGCCTCTCTGTGTGTCCCCAACGGCACCTTATTCCCTATATAGTGCACTTATTTTGACCAGAACCCTATATAGGGAAAAGGGTTCAATTTGGGATGCACCCACTCTGTGTTCTTCGGTCCTTCTTCCCTGTCTGTCAGTATGACCATGACACTTATGGCTGTCTTTCCTTCCTCTCTTCCTCCTCTTGTCTGGAAACTGCGTTCTACCATGGAACATTCCATCAACTATCCTAGGTAGTAAAGGTACTCTCCACACTTTACTTCCTCAAACTCCATGTAGTCACGACTGTCTCAAATCCGCTGTCTGTGGCCTTATATGGTAGTCACATGACAGTCTCAAGTTCACTGTCTGTGGCGTTATA…
23	sf000327_02AC	GAGGTGGAGGGAAATTCAGTGTACCATATCATCAGCGTGCGTAACATTGTTCAACTGAATGCAACTCGTAATTGCACCCAATTCAGTGTGCTTATGTGTGTGTAACATTCTTCAAGTGAACACCACTCACGATTATCTTAAGACACAAACAAGACAAAACATAAACGCATGTCATGTCATGATGTCATGCCCTCCATCCCACACAGTATCCACTGGCTGTCAATCATCCTGTCATCATCTTCAGGCTCCAGGGAATGTTACCAGCAGCCATTCTGATAGCATGTCCTCACAGAACCGTTTTAAAACATATATTATGATCTGTGTTGCCTCATTCGTAACTTGTTTGCCTTGGTAGTCTATTCTCTATTCTTTATTATGTCTTGGATTGACGCATGGTAA…
24	sf000390_01AC	TTTATGATAAATGTGCACAAAGTGCTCCCTCCTTTCCCCCTAGTGCACATAAAGGATGTGCTAGGTAAAGTCATAACTCTCTCATACACAGCTTATCACAACATCTCTGCTCAGCCAAACAGAAGCACCACTCTGAAGCTATCTTTCAAGAGACAGCCGTTCAGAATAATCCAGTATCCACACAGGTATACTGTTGGTCGAGGTGCTTTGCTGTCATTGTTGAAAGTGTAAGGCTATGTCAAAGCCCTCCAGGCCCAGTCATGAGTACCATGGTAATAACAAGTCTTATAATAGTATGTCTCCGTTTGTATAGCATATTCTGTTTCATTTACAGGGTCTTGTGTGCCTCAATTGGAAGACTTACAGACTTACAGATCAAGCAAAGCCAGGGTTGTGGGT…
25	sf000392_01AC	ACGGGGTTTCTGGAAAGAAGATGGGAAAAGTCTGAAGATGGATTGGAATGAGTCCCTGAAATTGAATGTCATCGCCCCATTGTATGCTGACCTTCTCAATTACATCCGTTGTGACCTAAAGAAAGTGAAAGTCAATTCCATACATCTTGATTCAGTCCTTGATAGCTCATACTTGTGTTTCTTCCCCACCATCACCAAAGACACTGGCCAAGATTGGCATGAAATGATTCATGAAGTGTACAGGTCAGTCAATGACAGAAAACTTGACCTTATTCCAGTGCTACACGGCTCAACTCGACAAGTTCAACACAGGTCAATAATAGAGTACACTGTTGAGTGGTCTAGTGTGAGCAAGACGGAACCAAGTGATGCACCTCATTTGAGCAAAGAAATAAATCT…
26	sf000397_07CG	TAGAAGATGAGAGAACAGCCTTTGCCTTAATTGTCTAAGAAAAGTGAGGAGAGAGGAAATCACAACTGAATTAGGTCTATAATCAATAGCCGTTATAATAAGCTTTAGAAATCATCCATATATATTTGCAAAAATAATACAGATCCTGCTTATATTGCCTGTTTGAGTGTTTGGTTAATAGCATACTGATTCTGTGAGCACCAAGCCTTCGTGAGCACCAACCACAACCTGTCGGTTAAATCATTTCACAAATTGGGCTGTTGTTTAGTCTTTGCTTTGCTGTAATAAAGGCTTCACACTTTGTATCTCGTTAAACCGCCTCTCTGGTATTATTGATCATTTATTGAGTGTTGTTTACACTGTTCCAAATGATCAGACAAATTATATTTGTAGTAATAA…
27	sf000428_01AT	AGGTGAACGGATGATCTCTACATGTATGCTTCCCACTGTGAAGCATGGAGTGTATGCAGCAAAGTTCAATGATGATTTCTCAAATCTCTTTTTGTACGGCTGATTCTATTGATCATAGATCTAAGGAGGTATCTGGGAAGGTATTGGCATCAATCACCTACTATAACCAATTGCATTGAACTGAATGTCAGAGCCACCTTGATGCACCTGTTTGTGGTTATTTTATGGTTAAATAATGACTGCAACGTCCTATAACTAATCCTGATTATAATTAAGATTTGTGATGAGACAATTGATGCACCGTATGTTATGCAGCCAGGTAAAATGCATTAAGCATGGTAGGCTATATAATGACTAATTACCCAGTGCTTAGATTGTCCAGACAATTGGCTAAAGATT…
28	sf000583_02CT	TATGGGACTCCCAATCACAGCCGGTTGTGATACAGCCTGGAATCAAACCAGGGTCTGTAGTGACGCCTCTAGCACTGAGATGCAGTGCCTTAGACTTCTGCACCACTCGGGAGCCCCCAAATGCCATAATAATCTGGACAAGACTGCCGAATCGAGGCAACGGTAAGAATCTTGATTAACTATCTAATGTTAGCTAATTTTAGTAATAAATAAATTAGCTACATTTAAATTTAAATGGACAATTCTGTGAAATGTCTTGCGCAAGGTTTAAATTGACATTGATACCTGTTAACAAAGGTGTCAGCTGGAGAGAACGTGCAGGAGCTTGCAGGGATTTGTAGTCATGATATCTACTTTGATGCTAATTAGCATTTTCGAATCCGAAAGTAAATAAAGCCG…
29	sf000584_01GT	TACAGTGCCTTCGGAAAGTATTCAGACCCCTTTTCCACATTTGTTACATTACATCCATATTCTAAAGCTGATTAAATAAAAACAACTCCTCAGCAATCTGCACACAATACCCATAATGTAAAAGCAAAAACAGTTTTTTAGACATTTTTGCAAATGCATTAAACATGAAAAAATGAAATATCACATTTACATAAGTATTCAGGCCCTTTGTTATGACACTCGAAATTGAGTTCAGTTGCATCTTGTTTCCATTGATCATCCTTGAGATGTTTGAGAGACAGTGATGCATTCAGTCAGGATGCTCTCGATGGTGCAGCTGTAGAACTTTTTGAAGATCTGAGGACCAATGCCAAATCTTTTCAGTCTCCTGAGGGGGAATAGGTTTTGTTGTGCCCTCTT…
30	sf000633_01AT	GGTGAGTACCTTTGACATTAATCCCACAGTGTGTTTGGCAGGTCTCTCATTCCAAGACTCTGTCAAGGACTCAACAGAGGGCTTACCGGATGTGTTACGTGATGTTAAACCATGTAACAAAAGCTTAGATATTTGAATTGAATTGGGAGAGTTTGTTTAGCTTGCATAACAAGTATCAGATGAGATTTCCACTCCTTCACCTCCTTGAGCTCTCCAGACAATTTAAAAACCACGACCGACAAACACTTGGCAAGAAAGTTACCGTTCTATCAACGGCATCTCTTTGTCTTGTGGAACCAGATCAAGCAGGGCTACTGGTGTTCAGTCTTGGAGTGCCCACTACATGTCTGGGCCGAGCCAAAGCATGAATCAGTAAGCCTAATTAAAGCAGAGGTAATC…
31	sf000657_01CT	ATATGCATGGCATGGCAGACAGCTAGAGTTTAGAGTTTCTGACCTGTGAGTTTCATGTTTTGTTTACTTTAAAACATACTGTAAGTCGCTTTAGAGGCAACTTTACATTGTTATTTCAGTCACCATTGCCACCTTTTACTTACGCAAAGACAAGGCCATATCTTTCCATAGTTCTCCTACAAATATATTATGGAGATTCACATTGTTATCTGGTAGCTGTAGAAGTAACATTACTTGAAATTCCTGAGCGGTTTTGAACCGATGAAGCAAACAGAATTACTGATCAGAACATAATTTGTTTTGCCTGATGCTATACTTGTACAACACCACCATATTATTTCTTTACTTCATAGAAACCCTCGAACAGTGTGTGAAAGTGTAGGAGTAGAAGGTTTTAGT…
32	sf000679_01CT	GGGGTATTACGCGCCGTCCTCCTCTCAGCAGCCTCCACTGATGTATATTTTCCTTGTGGATTTTCAGTACATATCAATCAGTATTGACTGTACATATTTGATTTACAAACATTTTGTGCAGAGATTGAAACATCTATGTTTGATTAAATAAAGTTAAATGAATCTATACAGTGCTGTTGTCTCTTAGTCTGGTGAGTTTGAGATGCCAAATATGTATTTCAAAGACACCTGTTGCAATATTTTACACCAACAATTACAGTATCTGTTATCCACCCAGAAGCCCTCAACTCTTACCCAGCACTCAGCCACATTAAAACACTGATATAACAATACATATTTAATGAATCTGTTAAACATCAACACAAAAACTAGTTGTGACTTAAAATGTCATTAAATATT…
33	sf000706_01CT	AGAGAGAAATGTGTAAAAATCTCTGAAGAATCCACTCACATGCTACAGTGAATATGATACCAGCCAATTAAATAACTACAAAATACTGAATATCAGCACTAATGTGTCGTTTTGACATTGTGCTCACCGGTTCAGTTCAAACAAAGGAGAATTAAGCGTCCATCCCGATACAATTGCTATGGGCTGGACAATGGCAGAGGTGTCCAATTGCAGGACACTGGCACATATCTACCAATATACATCTAAACAAAGTCCTAAAAACGAAAATGTATCACGAGGATGCATTCATTGACCAAGTCTCAAAGTAGAAAACCTCTGCAGCGCGCCTTATGGTAATACCTGTGTTCCCAAGCGTGTTCCAGCTATTCTATTGGCCATATCGATGGCAAAAGAACGTAT…
34	sf000717_02AG	TTTCTTTCTTGCGTAAATTATAGACAGAGAGCTCCTCGAGGACCCAAGCAAAAACCGAGGAGGTGGAGGATGGTGGGAGAGAAAGAAAGCGAGAAAGTTTTGTTTAGCATGACCCTATTTGCACTATTTGTTTCACGTTCACTTTGTTGTTGTTTTGTGATATCTTCTGTTTTTGGCGTGTGTTTCTACCTTGTGATTGGTGTCTCCAGATGGCCACAATGTGAGCAAGGCTTAGTCATGGTGAACACTGTCTGCCAACTCCCACCGCAAATTACACACATACATGCGCACGAACACGCGCATGCACACATATGCACTCACAACACACGCACACACACACGCACACACAACATACATAGATGCACAAATCTTCAAGCTGGATATTCACTTAATACTGTA…
35	sf000719_01CT	AGAGTAGACCAGTCCCATGTCCCCCTTTCATTATTTGTCTTTTCATATTCTTACTGAGACCCTTCATGGCCTGCCTGGCTGACTCATTTATTTATTCAACCCTTATTAACAGGTTCTTCTCGTTGAGATTAAATCTATTTTTACAAGAGAGACCAGTTCAATGGTCATGATGCCTCTTGACAGGGCAATGATTCACTGAGTCACATTATGGTTTCTCCACCAACCATACCATCCACTGTGAATATTTCAAACTTTTTTAAATGCATGTTGTTCATTCGGTTTGAGCTAACTTTGTCGTTCACGTGGGGGAGAAAAAGAAAGAAAAAGACAATCAACAGCCCTGAATGAAACCTCGTGATGAGGCCATGTGCACATGGGAAAAACCATGTCCTATTCAGA…
36	sf000747_02CT	CAGAGACACCGGTGGATTCTGCCTTCCCTGCTGAATGACTGATGGTGGCCTATTTTTAATGCATTGTTAAATGTGTAATGCATGGAGACACTTTATAAAAGACCTGCGAGTGGAAAAGAAGGAAAACGGAGATGGCAGAATGGGGTCAGAAAGAGGGGGGGGTGAGCACCTGATGGGTCCTGTCACAGGACAAGGCAAGCGCAGATAGGAAGGATTTCTTCTATTCAATACCTTATCAATCTACAGAACTATTTCAGGAGAAATTCTATTGCTCCCCATAGTGTATGGAAAGTTCCCTTCTGGAGCGAGAAGCTGACTTTCAACCTGTTATGAAAAGATCGTAACTAGCTGTCAGGGCCAGATCATTTTAATGCAATATAATAATGTTCTGAACGAGAG…
37	sf000810_03CT	GATAATTCATATTAAAACACAAGGCAAGAGATAGGCTGTAAGGAAGAGGCAGAGATGCTTCTCTCCTTCCACAGAAAGCAACTTCACTCCAACTCAAACCACACTTCTCATCTCAATTGTTAATAAGCTACAGCGAGAGGTAAATAGTATGTCCAATGAGCTAGCACTGTCAAAGGCAAACACAAAGACAGTCCCTTACAAAAAAACAGATTTAGCCCTTCAGATTCACAAGGCCTCTTTAAGCAGATACAGACATAAACATTTAGAAAAGGTAAAAGGAATATGAAGTATGCAAGGAGGGAGTTTATCACAGATATTTGGGTTACTAAATACACAAAACACCCTTGTTTCTGTGTTTAGGTAAACAGCAATCATTTTCTGGAGTAATTGACAAGTGAT…
38	sf000854_01CT	TCCCTTTGAACATTTGGGAGGCAGGGACATAGATACAATATAGAAGCAAGGAATAACATAATGGGTTTGGATGGGGCACCCTTCAGAAAGACCGAGGGGCACCCCTTAGATGTGGCGACCCGAACCATAGATGGGCGGTGTCTGCGATGATTTAGCGCTAGCTGTCCCATTGCGTCGGCTCAGCATCAGAGAGAGCGAGCGAGGGAAGATTGAGAGGAGGGAGAGGGAAGGTCAGGAGACTGGGACAGATTTATGGAGTGGCACTCCACTATTTAAAAGCTTGCCCCCCATTACATTAACTCTGCGATTATGGGGGAGCAGGGAAGCCGCGGAGGTAAATCATGTCCACTTTCATACAGTGCTGCTGTGGCCAATAGGGTCTGGCTTAAGCAGATCCCT…
39	sf000878_01AG	TGTAAATGTGTAACTGCTGTACCCAGCTAACTAGTTTGTTACGTGGACCACCAACTTTGAGGGCATGCAGCTGATTTGACTACAACAGTCGTGCTAAAAGCTAGCTAACGTTAACTGGCACAGCGAGCCAACAAACGGAGCTTGTCAACATAGCTAACTACTAGAGTTCGTTAGCTAGCTAGCTAGTTTGTATAGCCAAATCAGAACTGATCCAGGCAGCACGGTTTCCCACTAGCTAGCTCCTTTAATGTATGTTGGTGGATGTTTAACATGCTAAATAACTAAAGCGCTAACTAGCTACTGATGAAGGCCTCAGTTACAGGGCCTCGTTCAAGGCTACTTTGATGACAGTGCATTCACAACCTGTGACGTTAGCTAGGAAGGTTTGCTAGCTTGAAG…
40	sf000891_02AC	CACTGCCTATCTCAGTTTATTCTCAGTTAAACCACCTATTGGAACTCTTGTACATATCCTGAACCAACTAGAAACGTCCTCAGTAGGTAAAAGACATGGATAGCCTTCCAGCCATCCAAACATTGAGCCGGGATTTGGGACAGATACAGAAATCCTACACTCGTCCTCCTCTTCCGAATCTTCCGTCTCTCCGTGCTTTGAATAACAGATAGATTTGTTTTCCTGCCTCTTTAAAGAAGGATATCCTTAATTTATTTCAAATAGTGCCCCTCAGAACCGGCAGATGATAACAGATAGAGTCTGGGTTTAGAAGTATTAATAAATCCTCTAGTCAGACAGCGTCTATAGAAAACAAAGTAGCTTGGTCTTGAAGGTCCTCAACTTCTTAACCCAATGAAT…
41	sf000905_02CT	AAAATACATAATCAAAAGATACTATATGCAAATTACATAATTTATCATATGTCTGACTTCATAATCGATGTATTTTTGTCTGCTGTCAGAGACATAGGAAAAGTGTGACGCAAATGTTCTTGTTATGGGCGTCTCTTCATTTTTATGCCTTGGATTGACAGTATAACTAACCAATACACTTTCGAGTTTGTACATTTCCAGCAGGCTGGATTCCCCAACTTGACCAATTGCAGGCCCAGATTTGGTGCTCGTATTGTTTTGACCTCTGAAACCGCATCACCGCCTACCTCGTGCCCATGGCGGAGGAAAGCTATAAATATAGGCGCATGACAGCCGACTGGGACGAAGTTGTAAAACTCCCAGGTAGAAGGGAAACATTCTGCAAGCCTGCTGAAAGGG…
42	sf000961_01AC	GTCAAAAATACTTCTAATTATTCAGTGAGACAGTGAGAGCTTGTTGGGTATATAGGTAGGTAGGTGTGGGCAAGGAAGAGGCATAGGATAATGAGCGTGTAAAGCTTTCTGTCTGTCTGTCTGTCTGTCTGTCCGTCCGTGACCATATGAAGCCAGTTTACTATAATTGTGCAAATAACTCACTAATTAGCAAGGAATATGCAACAAATGTGCACACGTGGCTACACTGGTTATAACTGGTTATTACTAGGTATGAGCGTATACAAAATCCAAATTACAATTGATTTAGTTGCAGTCAAATCACCTTTTATAAAAGTCTGTCAGTGGTATGAATACTTGGTAGAACTGTAATACAGAAACCAGCTATTCTCTGAATGTACAATTCATATGGTCTGTCCG…
43	sf000966_03CT	TTCAGTTGGGCAGTGTTACTTTAAGACACGTTCCTATTCACTCCCATTCACTCCCTGTATCTGGTAGTCCTAACCTTGATGGCCTTGAATATACTATGAACCATGAGTCATTTCTGATCACCGGAGTTGAAATGAGACCCCAATTCCTCTGATCATTACAAGACCGTTGGTTGTATTTTTTCTCTCTCTTTTCACGGTTGAGTGGTTTAGCATAGATCTCATAATACTGACAGCTCTGACCTTCACTCCAGCTTTAACACTTGTTAAAATGTCAAATCTTATTAGCTGGCTCTTTAGGAAAAAGTAATGTGGTTTATCTACCTAAGTTCTCTTCTCCCTGATGTGAGGAAAGCCTTCAACCTCTGGTTGGCTCAGTCTTGGGGCTTCGCTTTTAGGGCA…
44	sf000970_01AC	GAGTGGAAAAACACCACAGCCATGCCTGTACGAGACCTTAGATTACACAAATTACAATGGGGCAACATAATGAGCTGAACTCTACTGTGTGAATTGTTGACACGGAGTTATTTAGTGTTTTAAATGCATTCTAATATCAGTCTGCATTATGCAAACGCAGTAACGCCTTTATAAGTACCTCCAGATGAACATTTTGTGTTGAACTTGTTGATTCTCCAAGACTCTTTCTCAATAGCCTTCCATGGTGTCCTTTCTCCATGCCCTCTCGGAACACATTGGGAAGAACACCCATGGCTCCTCCCTCCTGACCTCCTTCAATGCATTTTGAGTAGGAAGCGATGAGTTAGGACTTGAGAAATCGAGCAAAGATCATTGAGAAATGGCTTACATGTACATTCG…
45	sf000978_02CT	GTTTTGTGGGTGTTTGTTCCTGTGTCCACACATGAACGGTTGAAGGTTAGTCACGTTTGTTGTTTTGTAGTTTTGTAGTGTCTTGTTTGCTGTTTTCATTAATAGATGGCTTATTTCCCTCAATCCGCATCTTGGTCCTATCCATGCTCCTCCTCGTTTGAGGAGGAGAACAACATTGACTGCCTTTACAGACATGTTAAATAGCTCAAAGGGATTTTTCTTTTATGCCTCAGGCCCAACACATGTTGACAGTTATCGTTGTATGAAAAGATCGGAATGCCCCACATAGCGAACCGTCTTGCATTAACTAGTTAATGTCTGCTGGTTGGAGCATGGTTGTGGCAATGTTCTAGCAACATTCTGGCAACTAGAGACGTTTCTAGGATTTGTACACATTCA…
46	sf001069_01AG	GGGAGAGTCATGGGCAGTGTTAAGTTATAAGTGACATGACAACTGCTACTATCCCTTTGATAGTATTGATACAAAATGACTGCTAGATTTCTTTGATTTATTCAAGACCGTACATACAGCAATAGAAGACTGACATCCTTGCAAAGGGACAAACCTGCATGTTTCTTCTCATGGGCTTTTCGAGCGACATTGGTGTCAAACATGACTCCACATCCTCTCTTCGAACATCTGAGGAGAAAACCAGGGACAGAATAATTTAACCATTAATCTGAGACATGCATTCACTTGCATTTTAAATAGAGAGTATGCATCAGCTTGTGCATCAGCGTAGGCCTTGCAGTATTCAAAGGATGTAAGGCCTACAGCACCATTAAAAGATTGTGACTTACTTGAAACTAG…
47	sf001086_01CT	TTGTTTACTACTAGAGGATGATGTCTCATGGACTATTGAGCTGATGCAAGATATCTAAGGAAAAGGCAGGCGGATTAAAAAAGCCATGTAAGAATTCAGAAAATTCGCCCCAAATACATGCCAACATAATGTAGAAACTCATAAAATCAATCTTAAATACACATCTAGAATATGCTTCAGAATGAAATGGAATAGTACTGTCACGACCAACACTCCAAGGTCTAAACTCAAATAAGAGGCAAAAACTAACCACACCTGTTTAGGTTTGAGATAAAGCTATTAGGTATGTTAGACCTGGGGTGTAAATTGTACACTGAACAACAGTATAAAGGCAACATGTAAAGTGTTGGTCTCATGTTTCATGAGCTGAAATAAAAGATCCCAGAAATGTTCCATTTG…
48	sf001164_02GT	GAACTAAGTCCCCCTCCTCCTGTGTAGTGTAACTGAACTAAGTCCCCCTCCTCCTGCGTAGTGTAACTGAACTAAGTCCCCCTCCTCCACCTGACTGTCAAACTACATGTAAGCCTACAGGCTGTCTTCGGGCCACATATTGTCACTTTCTTACCATTGAGGCTGGTTCTGTATGACAGTGAAGTACAGTATGTCTTCACAGAGCCAAAGTCTTGAAATGTCATCAGCTACTGACCAAATGAGTGTTTTCTCTCCTTTTTCTATCTCAACCTCCCACAACCCCTTTCTTTAAACTTCGGTTCCAAATGGCAATGATTTGTTCCTCAGAGATTTCGCAAACCTCTGACGTCAGTAGCTATGGTTCCTTAAACTTGTCCAGTGATTTTTTTTCTCGACATT…
49	sf001181_01CT	GTAAAACTGTTCACCATGGATACATAACACCCCCGAACACTGATCATCACTCCACAAAGCTCATTATAGCAGTTAGATCCACTTAAATTTGTTAATCACAAACACACACACAAACCCCATTAATTCCATAAGAGGGATCTTATTAACGGAGGTTGGTAATTAACAAGGATGGACACAATGCTCCAACAGAACTGTGGATCACTGCACAGCAACATGGCAGATTCACCACGCAGATCCACTAGGCAGAATAATCTTCTCTCCCTGTGTCACCAAATCTCATCCTACTGCCTAACCCACTGAACACTGAACCAGGGATATATCATTATCATCTGAACCAGGGATATATCATTATCATCTGAACCAGGGATATAT
50	sf001184_01CT	GAAAATGAACACATTCTGCAGTGGAAATTGGATGGAAATGTGTCAGGCGATTGCCCTGGCTGGTTGTTCTACTTTCTGTGCAGAGGGACTGAAGGTGTGGCTGCTGCTGTGAATGAGGCCCACGGACTGACTCCATTTCCAAAGTAAAGACAAACCCACCGTGGCCTCTGAGTATTCTCAAGGCCATTGTTGTCCAGCTCCTGCAAATGCATTCTTACCTAGGTGAAATGCATTTGTCCACCACATTCTATCTCTCCTGTGTTTTCCATAAAGCATGGCACGAAGAATGGGAAATCTTAAAATAAAGCAGGGACTTTTTTCTTCTCTCAACAGCAAGAAGGGGGAAATGCAATATTGATGAGCAAGTAATGTGTTTGTCATCACAAATAACATATTTTC…
51	sf001284_01AG	GCCAACAACCGGAAGTTACGGTTTTCAGGGGAAATGATAGAGAGCCTGTGACGCAGCTTCCACTTTTGGACGTTAACCCTTTAGAAACAATAGCGGACGTCAACGGCCGTTCTTTAAATTACCATAGCGGCCTTTATATTGTAAAATTAACTTACTAACAACCTGTTGTCTTATTTTTGTGGCTTTGAGGAAACTTGGGGAATAGCTCTCAGATAAGCCAGTCCTGTCATGATCACCGGGTTGATATAGGCGAGCACATCATCGGTGAAGCCCTGTTTAGCTATAGGTCCTGTATAGTCATAACTATATATTTGATTGTTTTGTTTCTACCTAAGTAATTCATGTGGAAACGACCCAAGCTGTTTGCTATAGATAGTCCCAGCTTTGTAACTAATCAGC…
52	sf001437_01AT	AGCATTGCACTGTTATGAAGTCATTCAGTGCTCACAACCTAGCTTGACACGTCAAACTGGAAGTGTGCACCGTTTTAAAGAGAGAAAGAACCATCTGTCTAAAGTGTTTATTGAAGTGTGTCATTCTAGCCCCATGCTTTGCCCAGATCCACGCTGCCAGCCTCGGAGGGGGATGGGCATCTGTCGACCAGGGTGAGGTTTGTCACAACCGCACTGTGTTGGTTTTCCATTATGAGTTGTGCAATTGGATCATTCACTCGCCTGGAACAAGAGAAAGGGAAAGATACTGAACCAAGAATACAAAGTGCACCTCGGTGGACCCAAGTGTCCTGTTAGAGTGCTCTTCAGGCTGACCTACAACCTTTCCTAAAGTGGAG
53	sf001601_01AC	ACAATTTTTCATTTGGAGAATGATGCTGCTCTTTATTTTTGGATTTGACCTGCATTTCTCCAGATTGGCAGGATTGCAGGGATGTGCAGTAGGTGAAATAAAGACACAATGAGTTACAAGAGTTTTACATAAATACCAACTGTCTGACCAATACTGTCCTATCGCGGCAACTCTCATCCATGGTCTTGGACGATCAATCATCAACTGATGTTTCTGCTATTTTTAACTTTGAAAACCACACAGATAGAGTCAATGTTGAGGAGGAGAGAGGAAAAACTATTTTAAACTCTTCAACAGAGAAACAAACTTCCTTCAGTTTGCTTTTACGGATCACGGCTTTTGCAGAGTCAGCAAAAGAAGTGGATCGTTCATTGTACCTTCTCCTC
54	sf001644_01AG	GTAGCAGTGACTAACCTCCCTTTATTTCTCACTAAGACAGAGGGCCTGGGCTACCCAAACAAACAAGGTTAAACACTGCTGATACCAGAGTAGAATCACGGGGGCTTTACACAACCTAATGATGATATTATATTCCTTTCCGGTCCTTATTGTGGAATGTAGCATAACAATTATTTTATTGTCTTATTGTTTATGATGAAAAAGATCAACCCTTAACTACCTATATTTTGGTATGATATGATAAGATATATGATATGATCTGACTCTATAAAGCAGCTAAAAATGGCAATGTATGACAACAAACAGACATGTCATCACGTGTAAATTGTTGTAACACATTGTTTGTGGAAATTCTTTGCTCGGTATCTCAAAGTGGAGCATCTGGTGCATGTAATTGGG…
55	sf001661_01AC	GTACAGTGTAATACTCCATACAGTATACTGTAAACACTACATGTGAAATACTGTACAGTATATTACTACATACAGTATACTGTAAACCCTACATGTGTAATACTGTATAGTTGACTATCTTACTCCAGTCGTCTTCACCTGGGGTACCAGGACCCCTGGGGGGTACCTGGCCTATCCACAGGAAGTAGGAAGATTCATCAGAACATAGTCCTAGTGGTCAGCGGCAGGCGAGAGGGTACTTCAGAGCCAAATGTTGGGGTTTTAGTGTGTTGGGTTCAGAGAATGATTAAAACGACTGGAATTTTCCATATTATAAACTGGGTGGTTCAAGCCCTGGATTCTGATTGGATGAAAGCTGTGGTATATCAGACCGTCTACCACAGGTATGACGCAACATAT…
56	sf001686_01CT	GGGCAGGATAATCCATTTCAGATATCTCATTCTTGTTTCCGTGGGAGTTCTGAGAAAGGCTGGGTTACCATCATTACATAGAACATTTCTCTCTTTTTTACCTTACTGTTGTGTCGTTTAAAGTGTATTTATTTTGTCTGTGTACTTTTTTTGTGTACACGATAAATGAGTCATCATTCATTGCCCTAGTAGTTTAAGTTTGTCTTTATATTTCCATTTAACACGCAATGAGTTGAAATATGCTATGAGCTATGGGCCATGGGAGTTGAGCCGTTCTGTATCTCAGAAGCCCAGACTGTCACCACGTTGCCCGATAAACAAGCGAGGGCACCTGGACTGTCTGACAGAGAGCCCACTCCACTCCGCTGCGTTAGCGGCCCTAAATCTGTTTCAGACTGA…
57	sf001692_03CG	TTTCAAAATGTGTAAACACCATTATGAAGCATAGCTTTCTCATCAGTTGGATAATCAACCTAAAGGCCAAAGTTGCTAGATGCCCCCCACTCTCTCCATCCACCACCCAATAGCAGTAAAGTAACTCACATATGATTTAGAGTTACTGAACCACATTGAAACATGCTGTCGAGACAGTTTGACCAAAAGCTCAAAGTAGTCAGATTATTGGGAGCATTAAGATAATCTTGGCTAAGTAGGAAGAACAAAGGACGCTAACAAAGAGAAACGCTGATCGCAGCCCTGTCAGATTACAGAACTAGAATGGAGTTCAATACGGAAACAGAAGGCCACAGGAATTTAGGCCCACCTTCGTAATAATCATTAGTGGATATACAGTATGTACAGTAATGATAAAGT…
58	sf001740_01GT	GGAACTGATTCTGTGCGACTGTGATCCACACAGAGTGGAACTGACAATGATTGCAAGTGGGATCGTGCCACCAACCAGCTATTGACTCCCTGAAATATTTGATACTGTACACATTGCAACTTGACAGGCTAACATGTTAAATGTTAATCCTGGTTGTAGATATCTTCCCGTGAAAATTGCTATGTCAGGAGCTAAATCTCTCCAAAGCCCAACAAAAAAGGTTTCTAAACAGATGACATTTCTATCAAACGGTCAAACATGGTAGCTATTACTCACTCTTACCACTTACTAGAGTCTAATGTGAACTTTCAGGAAACTCTAACATGTTCTCTGTAAATTTCTGTTACAAATTCATGGAAGGAAGAAAAACATTTACTAACACTTTATTTTAATGGTCCG…
59	sf001770_01AG	ATCGGAAAAAGAAAGTAGATGCTTTTTCCACTTGGAACCAGCAAGTTCACTCCACCTTATTCATGGTTTCGCTTAAAGGTGGTGGAATTATCAGGGCATTAAGTCAAGGTCAGCACACGCTGTATCTGTAGACACCTCTGGCACACCTTCATTTCTTAGAACTCCACCACAAACGAATAGCATGCTATTCTCATGTTTCAGTTCAAGGTCAGAATACGCATAGAGAGAAAATTGCATAAAAAGGAATTACGTTTTATTTACTCACGCTTAACTAAGGTCGGCCCCTATGTTATATAAGCAATTTAACCATTTCCCTCTGTGTGACTGTTGTCTGGACTGATATGGAATCATTGAACAAAGACACCAGTGCCTGCTCTGTCTTTGAGAGGGGTATTCACA…
60	sf001996_02CG	TTTATCATTATTAGCAGCTCGTCGTGTTGATTTAATATGAAGGAATATTTCACTTTCTCTGGTCATAGGAACAACATGAATTTGTGCCTGAGGCAGATGCGGTGCGTCTCGAGTTTGGCCATCAGGTGGAAGGCGGTGATCGTTTTGAACGGGCATCCAAGTACGGGATTCCAAGTCGGAAACTCAGGCATCTTTCTAGAACTCTGACTTTTCGATCTGAAGATCACTAACGTCGTGATTTGACCTCGTTGACCATCAAATGCAGGTACCATCAATCCAGGAAAATAAAAAAGCTAATTATTTAAATTCATTCTCCACAGTGCCTCACAAGTGCTAAACCAACTGATCTATTTTGTCACATCACACAACACAATACAATGCATTTTACAGTGCTTTACA…
61	sf002024_02AC	GCGGGAAAACAACCTTCATTCCCCTCTGCTCTGCTCTCTCTAATATAACTAATGATGTTAGTGTCTGGCAGCCAGGCCGTCTGGAGGACAGAGAGATAATGATATGATCCTCTAGGATAATACAAGGGTAGAGGACAGACTGCTGATAAAGCAGCTATCTCTGGATAGAGAGGCAAATGCTATGACAAAGATGCTGTGATAAAAAGCTTCCAGTTATACTACCACGTATAAACGCATGTACAAACACACAGGCAAAAAGCGTACTTGCCTACAATACTGTGGTCGCACACACGCATGCACCACACATACTTACTGTTGTGTACTCAAAGTAGTACAGGCAGTTGTCTGTCAGGATGAACCACCTTCTCTTCCAGGTCTTCACTCTTCCCCCTGAGACAG…
62	sf002033_01AG	GGGGGAAAAACCAGTGGATGTCATATGCCAAGCAGTGCGATATCCAGGGGTCCCATTGTCTGAATTAGGACAGAAGGTAGAATGTAATACGAAGGTTGGATTAATATGCCAGAACAAAGATCAAGGTATTCCTCCAATATGCCTTGACTATGAAATTAAGGTCAAATGTTGTAAGACTGTGAAATGTCACACTACAACACAAGAAACTACACCTACTGTCACAACTACAACAATGTCAACATCCACTTTAACTACAATAACAAGTAAACCAATGACAATCACTACTCCTCCAACCTCAACTCAACCTCTGACCACAACTACAACTCCTACCACCACTACAACACCCACTACTACAATGTTGACATCGACTGCTCCAGCTACCATATCAACAACAGTTCC…
63	sf002155_01CT	AACGACAGAGTGTAGAATAACACGGTGGTTGAGGGAGGCAGTGGGTGAAACGACAGAGTACAACACGGCAAAATGTGTGTGATCATGTGCAATGGATTGTCTGTGATCCTCGTACTTTTGACGTGACTCATTCTAAAGCTGCGAACGTTGTGACTCGGAAAGCTGGTGTGTCAACTTCAGTGATGATACCAGTACCAACGTTTGTACCACCTTGATTGTCACGAAAACATTATTTATGAGTTAGATCAATCCTAAGAAGTGTTGCCTGTCTTTTTAATCAAACATTCCATTTGCAAAATGCAGTTGGAATATCAGGCTTCATTGTTATTCAGTTCATATAAATTCTCGTCTTGCTCGCACACATTTCAATAAAAGCTATTTTTGTGTTGAGTGAAGCTG…
64	sf002175_02GT	GGGGGCTGCGCCACAAACGTGAGTGTTTCTAATGAAACAACAATGCATGGAAATGACTATTGACAATCAATAGCTAAAATATTTATGATTGAGATCACAATAAAAAATAACTAAATTAAATGAGTGGGTGAAATCCTTCCTCATTGATTTGGCTGTTCAGTATCATTATCAGTCATTGTTTGGAGATTGCCTTTTTCCCTGCCTGACATCTGAACTCTGGGCTCTTATTTTCCCACCTTAATTGGACCTGTGAACGATTAATCAATTTACTTCATTGGCCCGTTCCGCCACTGTGAAAAAACAAGGTATAAATGATGAATGCAAAAATGTTTAGGTCTTCTTGTTGAATGCCTAGGATTTATTTGTGAGGGAACACCTGCATTGGTCAAGTTGAATAGA…
65	sf002203_01CT	GGACACACTGATTGTAACACATACGTTACAGTATATTCCAGGGGTAATACCTTCCCTGCATGCCAAGATAAAAATCAGATAATTGCTAGATGTCGGCAACTCCTCTTCGCTTTGTGCACGTATACAACATGCCTCTGCAGAGGTAGAAAAACAATCAATTCTTATAAGGGTTCAACCAATCAGCAATTGCGCTGTTGGTGACTAACTGAGCCGACAAGCTCACAGAACTGTTTTCATAGTGTTTAGTAATATGATATGCAGCACTCTAACAATATGGCAAACAATGTGGATACCGGTCTAACTCGTCACCTCAGTGTCCTCAATAAAGCATGCAGAGGAGTGAAACTAAGCATCTCATTATGCAGTAAACTGATTTTGTGCATCACCTTCAGAGCTGGT…
66	sf002250_01AG	GGGGCCACGTATGGCTATGAAGCAACGCAGACCATTAATGAAGGCATCTGTTTACATGTCATCTTACATTTCAATATGAATGGCACAAGAGCAAAAGCAGGTTAAGAGAAGACCATACCTTTTGTGCACTTTTCGTCCTTGCTTAATGACAAATGGGCCAAAACAATCCATACTGCAGTATGTAAAGGTGAGGTGATGAGTCCACACGCTCTGGAGGGAGATCAGCCATCTTTTGCTTTTCTGTGGTTTTCCTGAGCTTTCTACAAGTCGCACATTGGCGAAGATAAGGGTGTTTGACTGGGTTAGGAAGAGACGAGTCACAAAGTCTTCCTCCCACCATGAGCACACCATTTTTTGTCTAGGAAGGCATTGAGGCGGTACATCTCATTTTGGAGTGTC…
67	sf002333_01AC	GTGTACTTTATACAATTATTAATAACCATTATATTATTTTGAATAACGACATTACGATGAAGCAATCAGATGCATCACATTCACCTGGTGTAACGATAATAACAACAACAACAAGATCTTGTTAATACATTGTCAGGTACAGATACAAAACTTTACCGAGTCAAAACACAGTGCATCACACTACTGTACACATTTCATACAGTAAATGTGGGCAAAAAAATAAATAATGGATGTATACAATGCAAGAAACTGGAAATTGAAGTGCGCCATTCATTGTGATGAGCGTATACAGATAAGGCAATGAGACTGACAGCCATTGCAGCTGATGCTGTCGTTTCTACAAGGCAAGCACTGATTATTTCATTATCAAGCCAGGCATTGAGATAGCATTCTAAAGCG…
68	sf002353_02AT	AGCAGGGTGTTCTGGTTCTGCCTGCCTCTGCCCTTGCCTCTGCCCCGGCCCCTGCCCCTCTTTCTGGCTCCTACTCCTCCATCTTGGCTCTGCTGCTGTTGGGTTGCTTTAGCTTCCTTATCCATAGCCATCTTATCCATATTCTCCCCGGGAGCGCAGTTGTTGCCACTCACCCTGCAGTTGCAGCCCAGCTGGTAGCGGTGGTTGATGCCCTTTTTCTGGGCCAGCGAGAGGCGCTCCCATGGCTGGTTGAAATTACACAGCCCGGTGTAGACCTTGCCGTCAAACACGCGGCCTGAGGGAGAGAGAGGTTTGGTTACAGATCAGCTTTTGTCATGCATTACATAATTCGTGAATTATTTCATGACTTACAAAACATTCATTGCAATGGTTTGTTTG…
69	sf002792_01AG	GGTGATCTGGCGCCACATATCCATATCAGAAATGGAATAAAGATCCTAGGTCCACCAGTGTCCACTGAATCTGTCACGCTAATAAGAGTTTCAGTAGCCCTGCAGGGGAACACATTGGGTGTAAATCTCTTTACTGCAAGCCTCTGTAGAACAATGGATCTACAGTGCATCACACCTGCGTCCGTTCACCACAATGAACCTACTCTGGAGAGCTGCACAGCTGAGACGAGCTCTACTCCACGACACACTCAGCAAAGCTAACAATAGGAAAATTGGGAGAAGGATCAAGGAGAGTGTGTGTTTTGTATACATATCACATTTTATTTGATGCGCCGAATAGAGCAAGTGTAGACATTACCGACAGTGCAGTTCAAGAAGA
70	sf002948_01CG	CAATATGCAGTGATAATGTATTGGGGCTATAGTCTACTGCAAAAACCTCAGTTTTACAGAAATAACTGTTTTTAAATTGGTTAATGTTGCATAGGCTTACGTTTAAGCCATGATAAAAAATAAAATCTGAGCGGTAGATCTAGGTTTGTATTTTGACTCAGAAAGTGATCTTGACTCAGAAACGTTGGTTACCACTGGTATTGGGGAAACACTGCTCTGACCTTGTTGAGGTTATCCAGCTGTCCCTCTAGGTCTCTAGTCCGGGTCTCAGACTGTCCCAGGGAGTCTCTCAGTACCTGGACCTCCTGGGCTGAGGCCTGCTGGACCTCCTGCTCCTGGGCTGGTGTGGATGCTGCCTCTGACACCATCTGTAAAGGAGATCAGTCCAACACTCAATAC…
71	sf003018_09CT	GAACATCAGCGCAGTACCTTTTGCGCATGCGTTTGTGTACTGTCCTTCTGACAGTAATCCAAAATCGGCACACTCGCTGACCGTCGAGTCAGAAATTTCAGCGAACTATTTGGAAAAGTTGACCGCTATAACTTACTCCTTCCAGAATCATCTTGAAGGATAGAATATGCTTGATAGAACTTTCCAACAACACGTTCCGTTGGTGGGACTCATATTTTTTAAAACATTTATTTACGTGTGTTGGTAAATTCATATTGTATGCTTCTCTTTGGATCCTGTTTCTCTACGAAATCAGATTATTAAAAAATGATGTTGACCCATCCAATATTATTTATTTATTGAAAATCAATAGTGTAATCAAAGATGGTAAAGAAATTCTGTGGTATGACGTTCACTCTG…
72	sf003063_01AC	GGTGTTAGTTACATAATGGTATCATGACTCGGTGGTCTGCCTGTAATATTGCCATTGGTGTTAGTTACATAATGGGAACATGACTCGTGGTATGTCTGTAATATTGTCATTGGTGTTAGTTACATTACATAGTGGTCTGTAAGAGCAGTGGGAGCAGTTTCCCATTATACTGACTTCTAGTTTCATACAGGGCTATTCCCCTGTAGCTAAATTCAAGGAGCAATAACCTTACCCCTAACATTAACCATACACTCTAACCCTCAGCCTATCATATCCTAACCTTAACAACTTCTTCTAGGTTAGCAAATGTTGCTACAGCAACAATGAGCCAATGCAATTCAAGCTAGGACACAATGTAGGTACTGCCAACCAATCAAAACACAGAATCATAGGTGATCA…
73	sf003076_01CT	AGGTAACATTAAATGCTATATAGTGATACTATAAAAATGACTATCAAAGATTCTAGATAAAGTTAATCCAGGATATTATTCAAGGTAAACCTATTGAAACACAAATGATCATTGGTGGCACAGTAACACTGCAGAGGTTAATTTCAATATTCATCTCAACCTGTGTTGTTTAGACTGGTTGACTGCTCTTTGTGGGCACCAAAATGTCATATTGTGCCTTGCCATGGCAGTTCCATTTTAAAGATACAATATCTAACTTTTTGGACTACCTGACCAAATTCACATAGAAATGTGAGTTATAGGTCTTTCATTCCTGTTGAAAGCAACTCTAAGAAGAGGTAGATCTGTTTGTGTGTCATTTCTATGCTTCCCGTTTAGAAGTTTCATTTTTGCGTCTTT…
74	sf003084_01AG	TACAACACTAATTGTGAGACATTTAAAGATATCATAAGTTAAAACTCTTTATTTATTTTTCTATTTATTTAAATATGTGTATATTTATGAACGGATAAATATGATTTTGATACAACTGAAATAAAAAGGTTTTTGATACAACTTAAAGATTCAACGTTCTCTTAATCACAACACTCCATTTGTTATGAATGCTTATACCAAGTCTTATAATGCAATATGGGGTAACACAAGCATTATTACTGGTACAATTAATGCATAGGGCCCAATACTCATGGTCTATAGAGAGAGCCATGGGAACAGCTCTTTTAACATTTGGTTACAGCCTATGACACACTCTGGAGAGAGAGAGGGTCCCATGTATGGCAACCCGTGATCATGACTTAAACACAGCTGGTCTCA…
75	sf003092_01CT	GAACTAGGTCGGCTGAAGTTCCAATTTAAAGTTAGATTTATCTGTAACAAGGTGAACCAGTTTAGCCAAGTTTTACATGCTGCTACTTAAAGGAGGATAGTGTGTGTTTGCTGTGCATCATTTATCTTGTAGTGTTGCAGGTCCCTAAGTATCTCCCTCTGCCTCATTCTGTCAGACTGCTGCCCTGTCCTGTATGAAGAAAGGATGAGTGCTCCACTCTCTCTGTTTCTTTGTCCCTCGGTCTGTCTCTCTCTCTCTCTCCTGTGGTCTCACAGATTCATGCTCTCTTTCCAAGCCCTAGATTTGCCAAGATCCACATACACCGATACTATAGGCACTTGCTGTAATGATATAGAATTATGAATTTGGCCCTCCAGTCAGTTGATATGTGTTAGTTTT…
76	sf003105_01CT	GGAGTGTTGAAGATGCTTCATGTACTGTAGGTAGGAGGCCCTTTTTTTAATATGTCCTGGGTCACGTACTGTAAGAGGTTTGGCAGCAATGTTATGTGATGTGTGGTGATGTCTCTTATGGGCGATTTACCACGGTAATAGTGACCCTGAGACATGAAAATGCTAAGTTTGGTAACAGAATGACGATTTGCGCTGTTTGTGCCGTCATTCGTTTATCTAACTTTGCATCCGCACTGTTCTTCAAGTAAATGTGTTCTGGTAAAATGTTCCGTGAAAATTGTACTAAAGTAGTCCTTGTGCATGGAGTTGTATGGTTTGTTTAACTTTGCTATCATTGGTATTTGTTTGACATGCATTTTAAAGTGAAAAAATCTGAGTCTTGGGGGTGTTCCTCAAAAT…
77	sf003118_01GT	AAAAGAAGTAGAGAGGACCCTAGAACACTTTGAATGCCCCAGAACAGCTCGGCTAATATGCCTTCTCTACGACGACAACAAAAAAATCCATCGAACGGTTTGAAAGTCATGACCTGTAGTTTTTTTTTGAACATTGACGTTCCAATGCACTTATTGGGAACCAGGTGGGTTCTGGGAACGCAGCGGTAGAAATGCGGCAGCGGTAGAAATGCGGCTGCACAGATCCCGTACAGTCTCTATGAGGAGTGGTGTGTTCTATAGAGCACAGGAAGGATATTTATTTATGAGGATCATTATGATGCTGTGTAGCTGAGCCGCCATACACTACAGAGGGTTTTGTATGGAAACCAGCCTGACCTCTCTGTGCCTCCTACTCTGGGGCTTTCTCACAAACTAGCT…
78	sf003141_03AC	TCTGCACGCGTGAGAAGCAGGCCTCCCATATCGGAGGGCAGCAAATTGGATTCTAAACGTTTGCGAAATACCAGTACGTAATCCACGTGCAAAGTAAAGCTGAAACATTCTAAAATAATAAAGTTAAGCCGCCTTGGCTAGCTTCTTTGCTAACTATCTAGCTAGCTAGCTAACTGAAACTAGCATACACAACAGAAGCCTACAAACCCAACCCACTTTCTTATTCTGTGGGAAAGGCTATACCGACACGGGACCATAGAAACCCCTAGTGGCCAGAAGGCCGCACCATTTTAATGTAGTCAACTGGGTGGGACTTCCAACTTCATTGGCTATCCCTCCTGGTGACCCTCATGTCCAACCGGGTCATCAGAAGAGATCAGGCGATCGTGATTAAGAAAA…
79	sf003197_01AG	GCAGACCTGTGGCGAAGCTTGTCTGAGACGTGTGAGCTGAAATGAGGTATGTTTTAATGAATTACTAAGCAACTACAGGCACACACTGGAGCAGTGACTAATAATGACACTACAGAGCACCTATGATGTGACACGCTTGTGTTTTGAATCAGGGTTGAGCTTTTGGTAACGGAATCAGACGGACAATGGGGAGGTAACTCGTAAAGGAGGCTGCAGATATGATATATAAGGGACAGAACTACTGTAACTGTACCCAAAGGAACTGTGCACGGTTCAGGAGCATGACATGCCATCAACTAGTTTCACATTTGATTGAATATAGCTATTGTATGGCTAAGTTCATCATTGTCTGCAAAAATGACAAACAGCAACGGAGTATGGAAAATAACTGCAATTTGA…
80	sf003208_01CT	GGGGGAACCATCAGATCTGGTTGCCTAGTGACATGAGTTTCACACTGGCCAATTTAGCCGCTCACCGTCGCTCGCTACCTGTGTTCTGTGAAAGGATGGTGTGTGGTGTGTGTGATTACACAAACCTTAGCTCCCCCCGGCCAATCGACTGGACTCTAATGGCGCGAGGAGCAATACAAATTAAGATGGCCGCCGCATCCTCTCTTTGTACATCTCATCAAATCATATAAAAGTTAATGTCCCCGGAACAATGACATTCAAAAGGCAGTTTAGGCTTGGAGAATGCTCGGCTGTAAACCAGGGGGAGCACCAAGGTATGTAGAATGTTCATCTCCAATGTGCACTGCACAATCAAAGTGCACTTAACAGTGTCATATTGATTATGGTGGCTTAACCTCC…
81	sf003334_01CT	ACCTGCCACAAACATTTTATATGGAAGCTCATACCTGCCACAAACATTTTATATGGAAGCTCATACCTGCCACAAACATTTTATATGGAAGCTCATACCTGCCACAAACATTTATACAATGACTCATGATTTGTCATTGTGCACAATTAGTCTGATCAACTGTAGCCTAATGTTAACCACAGCTGCAGGTAGTCTAGAGAAACCATCTGGACCTGACCAGGGCAAACGTAACATATTTGTATAGCCTAAGCTATGTATTTATAGCTTCAAATAGGCCCATTTATTTGTGTTCTGGAAAATGTGAACGTGATCAAATTTGGTTTATATTCAAACTTCGGCTGGCTAGGTTACATAGGCCTTTTAAATCCAAAATGATTGATTGACTGTATGAGTATATTT…
82	sf003407_01AG	GGGAGGATTCGTTTGTCAATATGATTGTCAATATTGAGCTAGTTGCTACTTATCTATAGTGTTGACTTGTTCTTATCTCTGTGTCCTCATTACAGAACATGGGTCCAGAAGGAAAGGTTTGAAGGAGGTACCTGTGATTTCTAGGAAGGTAAAGCATCTTGGCTTTTCATTGTATCATTTTGCTTTTCATTGACAAAGTGATCACAGTTCCAAATGCTATGTTGTATGTGTGCGCGTGTGTGAGTGATCATGCCATTATTATTATGTGCGTCACCTGCTTTGCTATACCTACATCTTACTTTTCAGACTGAAGGGTGGAACTTGCCAGGATGGATGCCACCAACATACTGCCCATTCTGAAGAAACGCCTAGCCTTCTTGTCAGGTAATAACATGCTCC…
83	sf003442_01CG	GTAACACCATGATGGATTTAATAATGGGCATGGAAATTCAACAATCAGGGGACATTTTATAAAAAATAGAGTGTGGGTATTGTTGTTACTATTTCAGTAGTACCAGCCTCCCTGTGGTCCTGTATTTAGCCATGTTCAGTAAACAGCGCCCAGACACGGACATTAGCACCCCATTAGCACTTCGGCTCCCAGAGCCATGGAGCACAGCCAACCACTTTACATTATGCAGGGCATCACCACGGAGACCGACCCACTGAACGCCTGCCTGGCCAGGCAAGCCCTTAAGCCCAGGAGACAGCTTCTCATGTGGTCCTGTCAATCAAATGCTGGCCCTGACTGTTGATTATAATGCTAGATTGACCTTTGACATGGAACGAGAGCAGATAAGCTACGAGAGTA…
84	sf003500_02CT	GGGGCAGTCCCGCCCCCACTGCGTCGCCTGGCGAGCGGTATCCCTTTCTGTCTCATGACCTGAAGGTTGCACTCTTGCCATGGGTTCTGATGTCTCCCTATCACCCCCGCTGGGTCATTACTCCATAAGAAGAGCATACTCCGGTTTTGGAGGTCAACATGATCGTGTATCCAGTCCTCCAATGCTAAGTTTCAAATATGTCTGTTGATAAAGATTTGAGGGTAAATCCTGATTTACCAGTCTCGTCAATGACAGCTGACAATGTGCTCTTGGCTCGAGCCGATCGAAAACATGCTTGGTATTGTGCGAACAAATTCGAGAATGTTCTTAAATTCATCGCGCCTCTATCTGTCGTTTCTTCTGTGCATCTGAAAATAGTTTATCACTTTTGTGGAATGA…
85	sf003538_01AG	GTGATAACAATGGTTGATTTTTGATTTTCCCATTTTAAATTATAGAGAGAGGCTAGATTCTGATTAGTCTCCATTGAAAGTGTTGATGAGGTTTAACTGGAAAAATTAATTAAAAGTTTGTTAAGATTAGAATCATGACGTTTTGAGTATTTAATCAAAATACATTTTAGCAATTAATTAAACCTAATTTGCATACATTTGTTAATTTATAGATGGGGATATGATTTCAATCAAATGTTTACAGTTTAGACAAATGTCATATACAAATCAAGCACTTCAAATGAACATGTTTGTCTTGCATATGTAGCCTATACGTCTTTGCCGGTAACCCTCTGTTGCACGCTCTCCATGTGAAGTAGCACCAGCAATGGATACCATGGTTATGCATTAAATCATCAT…
86	sf003589_01AC	GCTAATCAAATGGATACCCGGACTACTTGCATTGACCCTTTTTTGCACTAACTCTCTTGTGCGGACTCTGAACACACACTAGACCCTACCCACACACTCACACATACTTACACTGAAACCGCAGCAATACATACGCCCACACATAGAATGCACACACATGCATACTGACACCACACATACACACGTTCACACTCACCACGTATGCTGCTGCTACTGTCTATTATCTACCGCGTTGCCTAGTCACTTTAACCCTACCTATATGTGCATAGCTACTTCAAATAACTCGTGTCCCTGCACATCAACTCAGTGCTGGTGCTCCCTCTATATATCCGTGTTATTTTTTACTCGTTGTTGTTATTCATAATTCACTGTGTGTTTCTTCCTCATGTCACTATTTAC…
87	sf003595_01CT	GGAGTGGTGATCTAGGATTAGTTTGGGGTTTTAGATTTTAATGAATGGACTGGAGGGACCTGATCTTAGATCAGTACTTCTAGTCGGAGATGCCTTATGATACAGGTCCAGATGCATTCTCTTCATCACACCACAATAAGGAAAGCTCTGACTCTAGCATGTGTGTTATTGTAACAGAAAGGCATTAAAGTCAGATACGTTCAAGGAAAATGATTCATAAGAACGGCAAGTAATAGGCCTAGTCACAGCATTTACGACTGTTTTGATTGTAAGTTTAAGACAACAATAAAGTGTGTACAGTACAGCTTGCTGCACACTTTGCATTGGAAAAGTGTACACATTTGGTATAAAACACAATGAAAATGTGGATTTACCATATTTACATTGCAAATATATACA…
88	sf003601_01GT	TTTAGTTGTCAACACAACCAAATATCAACATTTGAAGGAGATGTGTCTTCTGCTTGGATAGTTCCATCTGAGCCATTGACTTAGTCTGGCTTTAATTCATTTAGACTAGCCTATATCTCAAATCATTATTAAGATTCATTCTCATGTGTGCAATCACTGCCTATCATTGGGGAGCATTTTTTATTACTGTAATGTTGTTATTTGTATAAGAAAATTAATCAAGGGTGCAGAGAGAAGTGGATTGTTTATTTTTTAAATTAACGAGATTAAATAGTGCTGTATCCCAAACCAAAAATATATTTTTTCTTTAGAAACCTGAGACAGGGCTTTACCCAGCGGACCACCATGTCAGTCTATTTTCACCAATTTATCTCCTCGCTCTCTTTCTAAATATTACTA…
89	sf003610_01AT	TCAAACCAACTAGATGTACTAACGAGCAGACCCCCATCGGTTATCGTCCTGCACAACGATCCAGGACTATTAATGACCAACTGTAGAGTACACACTTGTCCACTAATCTCTAGAGAGTGTACGTCTGCCTGGACTCTGAGAACGTATACCGTAAACCCATTCCCCCCTGTGCACACCTGAGTTGGTTCCGGGTCTGATTGGATCGGCCAGGCAGTTAAGCACGCCCAGCTAGACACTGCTCACATGTTGGCCCAACTCCAAAAATTCTCCAAGAATTACCAGAGCCCAGACGGCAGAAGCGATTCATTGGAGCCTTACTCTCAGTAGCAAGAGCTGTAGGGTCAC
90	sf003614_01CT	TTTTTATGGCTCTCGTGTTCGATGAGTACAGCAAGTCAGGCTGATCTTCAGCTAAATTTAGGTCAAAACGGATGGACTAAATATTATTTTGGGGTGAAACAACGGCTCTGACTGACGGAACTGATGTCTCCCATAATTCGACATTGTGTGCTGAGTGGGTACCTGTAAGGTTTAAAGATGTACCTACTGCTGAACTTCAGGTCAAAATAATAATTCTGGCTATGCAGGGCCTGAAGATCTAATGTGTGATTTCTGCCCTGAGAGAAAGCAGAAAGCTGTCAAATCCTGTCTGGTGAGTCTGGCCTCTTACTGGGGAATTCCATCCAGGTTTGGCCCAAAGATAGATCAGTGGCGATTTTAGTATGTATATCTTGGTGGG
91	sf003621_01AC	TAGGACATGCTGTAGTCTAGGTGTAACAGGCCTAGGTGTCAGGTTGGGGGCTATTAAGTAGAAGGAGTTCCATTGCATATAGTTGCATTGGGATTAGAGATATAGGTATGCACTAGAACATTCTAAATGTGCATTCCTACCGGAGTGTAACGTTCTTGGAACATTTGGTGCCATTTTAAATTCGACATCTCAAACAGAGTTGGACTAAATCTGGACATTACCTATGGCTCTGAATGGGGATGAGACAGACAGGTCGGTAAGAAGAGGTATATCTGGGTCGGAGGGGTTGGGTGGTCTACTTCTTGAACGGCGGAGGGATCTTGATGTCCTGACCCTTCTCCAGCTTCTTCTCACAGTCGATCAGGTAGTTGACGCCGTCCACCACCGTCTGCACTAGCT…
92	sf003697_01CT	GTTAGGGCAGAGTGTTAGGGCAGAGTGTTAGGGCAGAGTGTTAGGGCAGAGTGTTAGGGCAGAGTGTTGGCGCAGGGCTACATCAAAAATGTGTGTCGTTGGGGGAGTTATCCTATCCAATTACAGGATAATCATGTTCAATAATATTGTTAATTTTAGAATAGCCCTCTTTGCCCATTCCCGGCTAAACAAACATCTTAAGTAACTTTCTCCATGAAGTCCCTAAAGCTGAAAAATGATTTTCCTCTTGATCTAAGATGTTGGTTTCTCCCGTGGGAAACCCGGGTTCACATCCTGTATGCCCAATATGGGGAGGAGGTCAAAGGGGCGGGACATGTAGCGGACATGAGTCGGTCATGGTCATGTGATGAGGTAGCCTCCCCTCGTGCTCCGTGGCTG…
93	sf003698_01AT	GGGGAATCCCAGACATACCATTGAAAGGGAGGGAAATGTGCTATCCTACCTGGACAGTTTCTGATAAACAGGCTCCTCTGGTCGTTTTGGTTGAAGGGAAAGGCTGTGTTCAAATAGTAGCTGTACAGTGCTGTATGTGCAAATTCACTGTATTTGTTTTAGGGTGAGTGAGAAGGCACTGTGTTTGCAAGACAACCTATGACGATTAAAGCTACATGTCTTTTAACATTGTGTCATGGAGTGTCATCTCAAAATTGATAAGTTGATGGAGTTGCTTGGATGGGCCTCTTGACTGCAAGCCAAGGGTAAGAGGAGAACACTACTTTGGACACATCACATGAATGTAATCTGCACATACAGATTCTAACCAGCCACCATACAAGGTAGACTACATTCATA…
94	sf003700_02GT	GGGAAGGGCACTATTTATTTTCCCCTTCTAATCGTTGTTCACCTGAACAGGAAAAAAACAAAGTCCTTCATTCTAGCTTAGTGTAATTAAAAACCAGTGGTTGGACATCATTATGATCTGTGAAACAGCGTGGGTGGAAAGAAATGAATATCCACAGTCCCCACGTATCCATGACCATGTACGAGGTTGCGGTGACTATACTGTTGTGTAATAAAAACACATCTTGATAGAATCCCACAGAGAATCCAAGCTGCATTCAACCCCGTATAAATGAGATGCTCTCGGTCGATTGTATATATTTCTGTGAGTGATCACATTGTTTAACACAAGGGAAGGTGAATGCAACAAATAGGCACCAAATAGGTTAAAAGGCCTTGAATGAAAAATGATCAAAGAGAA…
95	sf003713_01AG	TAGAGAGAGAGATTACCGTCACCGCTGGTGGAGATGCTAATGCCCACGCTTGTCTTTAGCCCAATTCCAAACCAATCACTTACTTTCATTACTGGGATCAGTTGAATTGGGCCTCTTACGAAGTACATTAAGTAGAATAGATAGCAGATCTCGGAAGATATGCTTTCCATTCAATAATTAACATCACATGTGGAGTACTATGTTTTCAATATGACTCTTTCTCTATTCCATAGATGTGTCTGAATCGTCAGTGCCAGAATGTCAGTGTGTTTGGAGTGCACCAGTGTTCAGGGAAATGCAGCGGACGAGGGGTGAGTACTCTGAGTTGGAGGGTATCATCTTATGTT
96	sf003715_01AT	TGTGTAGATTGATGAGGAAAAATGTGTATTTAATCCATTTTAGAATAAGGCTGTAATGTAACAAACTATGGAAAAAGTCAAGGGGTCTGAATACTTTCCAAATGCACTGTAGCCTAGGCCTACTCCACTATGCACTGCATCGAACAGTCTTTTTTGCGAACAGTGATTGAGTTATATTATTAGCCTACATTATGACTATCCAATTTACTCATCACTTTAGTAATAGTACGATATCTTACTTACAAGTCTGGAAATGTGATAATGCATGGAATGCCTTATTATAAAGGTACATTTTTATGGTGACTCACGCGCGGTCTTGGCCTGAACATCTATAACACACAACAAGGCTGTTCAGTTCCATCAGAGAGGACAGAACAGTCAACATCACATCTGACAGAT…
97	sf003724_01CG	GGGGTCTGCTAGTAAGCAAACTATTTAATGTGATATTCTTCCATAGCAGGTATACATCTTGCACTGCCTTACTTTTGGTCAATTTAATATTAATTGTACAGTAAGTCTAATGGAAAGAGCAACAAGATAAGTAGCCATGTTTTTGGTCGTCTCGCCCATTAGCGACAACAACTTTCATTTCCTCTGTTTATGAATGGTGTTCCAATGAACAAAAAAGCTAACTATTGCAAACTATTATAAAGTATGCAATCAAAAGTACAACAAAGTATACAGCTCATAACTCAACACACAAGTGTTACTTTTCATATAATTTCACAGTATTTGGAAAAATCTGCATGGTTTACCCATTGGAGGCATGCTGATAACAAAACAACAAAAACAACTGGCAATTTGTATTTT…
98	sf003726_01CT	AATCAATGAAGATGTTACTGTGTTCGGTTGCAATCACATTAGCCTCTGGCTCCTTTACATCAGCAATAGTTCAGAGATGCTAAACTGCCACTGTTCCATGTCATTCATAAACACTGGATCAAATCAAGTTGCTGATATTTTGTCAACTGACCTTCAAATAAGTGTTTGTAATCGGAGAGACTGTGGCCTTGAATCCATTCTTCAATCTGAATTTCTTTGCCTTTCTTCCAGCGCACTTCCCAGAAGAAGATCCACGAGACTGAGCAGAAGAGGAAAGTCAGCAAAAAGCGGAGGTCCATCAGACCATCTTCAGCTCTGACTCAGACTCTTCTGCTCCCCACAAAGGCTGGGCCAGGTCCAAAATACTGCACGATAAAATAAAGTCGCAAATTATGTCCA…
99	sf003728_02AT	TTGATAACCCTTGCGAAATTATGACTGTGCCAAGTCCATATCTGGTCAAAGTTTGTTTCCCTTGTCATGCTCCTTATCGCAGTTCTTAAGTACCCTATGCGCCAGCTGAGTTTCAATAATAATTTTGGAAATTCCGCTAAACCAAACCATCATATTGATACAAAGTGTTAGATGAAGTGGAATGAAACCAATTTGCAAGGAAGGCGGGAGTTCCCAGAAATCTTCGCTCACAGTGACGTAAGCTCTACCAAAAATGTCCCTATATGGACACGCTGTGCGTAAAGGAAAGGTAACGCAACGCGCTGACGTTATGGACATGAAGGCGCTGAATGTAGTCTAATGGCATCGATTGCTTAGAATTTATCACTGTAAAGTAGCATGATCTAAACCTATCTTCAA…
100	sf003813_11CT	GGGGTCCTGCATTTTCGGTGGAGCAGAGCTCCCTTGAAGAAGAGACTTTGGTCTCAATGAGACTTCCCTTCATAAAATGTTTTAAAAAGTGAAATAAATAAAAGTGTTTGAATAAAGAGTCAGTATAATTAGTACAGTATCACTAACCAACCTTTATTTGAGGAAAAGTCTGACCGTCTACTGTTTTCTCTCTCTCCCAGCCAACCCCAACGAGGAGCTACGTCTGACCTTCCCGGTGAGGGACGGGGTGGTCCTAGAGCCCTTCAGACTGGAGCACAACCTGGCCGTCAGTAACCATGTCTTCCACCTCCGCCCCTCCGTACACCAGACCCTCGTGTGGAGGTAAGGCTTTCCTCCTCATCTCTCAATGCAACTCTGGACCTCAAGGTCAGTTCC
101	sf003836_01CT	AAAAAAAATGTTCTCCAAAACGGCCTGAGTAAACTATCTTATTTATCCACCATCTTTGTGATCCTGCAGAAGAGATTGTGTAGAGGTTTCTACTGTCACCTGACTGTTAACACCGCCATGTCAAAACTACAAATACACAAACAGCAAACATGCATGCCCATGTTGCTTTCAGTTGCAGTCGTTTGGACCCTAGTCAGAGCTATTTGGACCCTAGTCAGAGCTATTTGGACAACAAAGTGTCATGACATTGTTAAGAGTCCATTTTATCGCAGATATGGACTCGACCACATGAATGCCCGGCCGTCCTGTCATCAGTCAGCTGTTCATAAATCAACAATGTTTTTTTATGACAGTCTTCATCCATAGTGGTCGCTTGTACTGTAATTGTGTCAGCCCCTA…
102	sf003897_01CT	GCTCAGCAATGGCAGGATTGGGCCTGTCTATCTTTGTAAATATGGACAGTACATGGTTTAGCAAGCAGACAAACTCGTGCAGCTAACTCTGTGTGTGACCATATGTTTAATTCATATCGCTGTGCTACATTTCTTTTAAGGAGATACAAGGCTGAGTGATCACAGTAACTGTAATGGGAATCATAGGCAATGAGGAGAAAACAGAAATAAGATTCAAAGATAAGGAGAGGGCATATAGAGTCAAGCTGGAGGTATAATCTGTCATAAAGTACCGACTACGCCACCTGGTGGAGGGTTTGAGCACCAGGACTAGAGCAGCGTTTCCAAACTTGGTCCTGGGGACCCCAAGGGGTGCACATTTCCCCCCCTAGCACTACACAGCTGATTCAAATAACTAAC…
103	sf003919_01CT	GGGGGTCAAGTTAAGGACGACTCTCCCCGTCTCCCCGCCCTCCCCCACGTATCTGCTGCTGCAGCCTGAGGTCCTTGAGCACTGCGTCGGCCTACATTTCAAATGCCTGGCTGCCTGCTCCCATGTTGCGACACGCTGCAAATAAAGCATTCCCAACGTCTGTCGCACAACGGTCTACAGTGCAAACCATTTTTTTATCCAGTTAATCCCCAATAAGCCCACCTGCGATAATGCCCCCACATGACTATGTAGCCTATATGGGACGAATAGAGAACACAGAGTTCTTTACTGGGCTGAATCAACCCACAACGTGAGCGACTGCTTTGACGCAGCTACGGCAGTGTCCAGAGATGCACCTCCCATGAACTTGTCCTTACATTACCCTGACTCGCAAGGCAA…
104	sf004016_01AT	AAAAAAGGTTTGGGAACCATTGCTGCTGTATGCAACCCTACTTTACTTGTTCCCTTATCTTACCAACAGAATCAATTCACCTCCAGCAAACACTCATAGAATTCTCTGGAAATGCCAATTGGAGGACAGCCTTAGATTTCCACATCTGCAATGATGCCACCTACTGGCTATGGGATTGCATAGCATGCTTCAGCACTCTCCTTATTAACAATAAGATTAAAGGACACGTCAGTCCCTGTGGTTCAGGGGAGAAGTCAAACTCAAAGAGCAAAGAGAGGCTTCAAGCAATGTCTCTAACCTCAAGGTCTGTACCAGAACAAGATAGGGTCGTGTGGGTAGAGAGGATAGAACACAGAGACAATGGAGGAAATCAAGAGTAAAGTGAATTAAAAAAAACAA…
105	sf004030_01AG	TCCTGTCGTACTTGGTCACTGGGACTGCATACTGAGGAGTGTGAAGGGGACATGATTAGTGGGGGTTGTAATATATCTTGAAGGATTTTGTATTTTATTGGACAGAGGAAAGACAGTGGGAAAGATACACAGAAGGTGTGTCAAAGGCAGTGGGCTGGATTCAAACATGTGAGCAGTAGGCAGCAGCACTAAATAGGCTAGACCAGCCATGATCAGAGTTAAGAATCAATAACACATTAAGATACTGTATTGACTATATATTAAGACATATCCAACCTTACATCAATCCCAAGTAGAGAATTGAATGGCCACATTAACACTCTAGTACTGTACTAACCTTCATCTTCTCACTGCCAAGTGACTGCAACACCTTGGGGTTAATCTCCTCTCCATCTGAGA…
106	sf004055_02CT	TTATTTAGCCATAATTAAAATAGCTGTTAAAAGTTCATATAGCTGTTAGAGTTATACATAAACATGAGGTTCGTAATATCAATGTATGAGCATGTCATAATGACAAATAATCTGTGTACATTCCTCACACGGAAGCATGTAATGTGATACCTTGTCATGTGTACCTGTTGAATGTATTGTAGCTAGTCCGCTCTAAAAGCTTTTTTTCTGACCAGTGTCAGTGTCCTAATGTATATTATGCTCTCTTGGGGCATTACTGAGGGATGGTGACTGCAGGGAGACTTGTAATTCAGCAATCCAGATGGTCGTAAAATCCTGCGCTATTAAGTGCCATATAATGCATGCGTAATAGCCGTTTTTCCATTAAATTATGGAATTACCACTCTGCACATATCGCAC…
107	sf004064_01AT	GGGGGGAGGTGAGTGCCTGAACAAATCCGTCCTGCTTCCAACCCCCACTCTCTTAAAGCTTCAAAGCTATGTGGGAAGATGAAATGCAGAGTGGTTTAATCGGCTATAACTCATCCCACTATGAGAAATTAGGGCCACTTCATGGTCTATGAAAGTGAATGGGATCCAGTAAAGCAATGGATGATAATTGGGCATTCGGAACACAGTGGTCTCCATAGCCAAACTCAAGGACTTAAAAGCCATTATATCTCCTAGTCTATTAGTCCTAGTTTATTATACTCATATTGGGTGGCATGTGCTAAAACATACCTCTTTAAATCCCCAGTGTTTAATACTAAATCACCAGAAAATCTTTGAAGAGAACATGACTCATTGATAGATGCAACGTAATACATTTTT…
108	sf004070_25AC	GGGGCACGCACTCAAGCACACAAAACAATGTGTCTATCTAACTGCAGTACTAACCCCATGAAGTGTCACTGATCAATCACAGGATTTGGCAGGATGCATGCAGCCCAAACACTCGTAAACATGTTCTCAGGTTCCCGTGTCCGACGGGCTCAGAAATCATTTCCTGTGGCAGGCTAAGCTGTTAGCAGAAAGCTGGAGGTAGAAAGTGAGTGTGATTGATTGATAATCTCACGCCTCCTCAGCCCGTCACCCCAGTCCCAGACCCAGAAATTTGTGTCAGAGGCAGCAGCAGAGCTCAGCTCAGAGAGAGGCAGTAGAAACAGCCCAATAGTTAAGCTATGATTTAGTGCCAGCTGTAACTCAGCCATGGAGTTGTTGCTGGCATGATAGGAGCGCTGC…
109	sf004099_01CG	GGAGAACAGACAGACTGTGTTCCAAATGGCACCCTCATCCATATGACGTGCACTACATTTGACCAGGGCCCATAGTGATGAGTAGTGCCGTTTGGAATGTACTGTATCTGCGAACTCTCTTCACCAGCTCCTCCGTCGTCCCGTCTCCCAATCCCAATTGATGATTAAGGCCAATCAGTGCCATCTCGGCCCGCATGTCTGCTTTCCGTAGACAGTGACCCATTTCCTTTGTATTAACCCTGTGCTCATAATACAAAACTGAATCTTTGCACCATTTTGCACCCATTCTGCACCCATTCACTTTGCACCCATTCTAATTACCTATTGCTCAATCATGTGGAGAGTTCATCATTAGCTAGGTTTCCATCCAATTGGCAACAGATCTTCTATATGAACATT…
110	sf004112_01AC	GAAGTGAAAAATGAGGATGACGATGGTTATTAAGATTTTGGCGTTAACCATGGTGATGGCGCTGTGTATGACGATGATAAGATATTTTTTTCCGTCTCTGTGAGCTGTCCCAGTTCTAACTAAATCCCATTAAAAAGGGTTTTCATCTCACTGCACTTCATTAACGACATAAAGAGTGTGACTCACCCCAGAGAGCGGCAGTAACAGACAGGATTAGGAACGACTAACTCATCTAAACGCTCCGCTCTCAACACCAACCAGGCTTTTCAGTAAGGAACCCACTTCAACAGGCCATATTAGATTAGCCAAATCCCGCCTCCTTGCGGAATATGATGATGAGGAGGGAGGAAGGTCATTTTGTGTGCTGTACCAATAAGCTCGTTTTATCCAGCTGTATAT…
111	sf004149_01AG	CACATTAATGTAGAAGTGTGTAGAAACATATCCTATCGTTATTTACAGTAAAAGTGACTCCAAAACTGACACGATACATTATTTACCGTTCATTTCTATTGGGCACAAAATAATCTGAAACAACCAGAACAAACTGCAAAAGCATCCAACACATTTGTAGAGTCACAAACCTGATGTAATAATTGGGTGCTATGAATATAGAACTAGATACTTCACTTTTTACTAATTTAATACACATAAGTGAATTTGTCCCAAAACTTTTTGGTCCCCTAAAATGGGTGGACTATGTACAACAAGTGGTGTAATTTATAAACGGTTCATCCGATATGGATGAAAATACCCTCAAAATAAATCTGACAGTCTGCACTTTAACCTCATAGTCATGCCATCATTTCAAAT…
112	sf004155_01AG	AACATTTTAGTAGTACAAACCTAGCTCTTACAAAGTAGGAATCAATACACATTGAAGATCAGAGTATCAAACATCAACATTTTGCACACAACTTACTGTTAATGAGTATGGATATAAGGAGTGGTGGTACTGCAGTTTTTACAGCATTTTACAGTAGTGAAGTTTTGAAAGGCTATCTTGTGTTATTGTGCATGTTTATCTTAGATGCTGGTAGCCTAGAATAAATGTTATGGAAGTGAATGTGCACTTTTCAATTGAGTGTTCTGCAACTACAAAAAACAATGCCGTAGTAAAAGCAAAAGCAGATATAGCATCGGAGATTCTCAAAATTAGGGACCATCTCTGATAGCTATAAGACCGCGGAGACTCACAATGACCTAGCAAATTGACTTAGCAAAT…
113	sf004209_01GT	GTCATCAGAAGCCAAATAGGGCCATGATAATAGTATGAGGAAGAGCCTTCCCTTCATAGATATAGCAACAGAACCACAGCAGAACCACAGACAAAGCTGAAACTCTACATTTGGACCATAGCAGAGCATAAAAACATCACCATCATCCTCACAGCAGGCATCAACACAATTATCATTCCGAAATGCCAGAGGGGTCTATTTGTGGCTGACTGAATGGGGCACCAGAGTTCCCCAATCCCCAACACTCCTTTGTCGTACTATAGGCACATTCATTCATTATTCAGGACCTAGTCGTCAGTGGAGCTATGGGGGTAATTGTTAGCGTGAGGTGTGTGGTGTGTCTGTGTTCCTGTGTGTGCGTGTGTAATTGTTAGTGTTGTGTGACTTGTCGAATATCAG…
114	sf004240_01AG	GGGTACATTCCCTATACCTACGCAACATTTTTTGTGACAAAACCATCAGCAGGCCTAGAGTTGAAAATGCCATGGAAACTCATTTAACTTTTATTTTTTTTATTCAGTATGGGAATTTAATACCAAAATACATTTTTTATGTGCACTATGTATTTATGCCCAGACTTTTATCCACAACAAGTCAATTTGACGGAAACAACTCTGATGGGAATTTCTTTAACATTCACATGAAAATCAATTGGATGGAAACCTAGCTATATACACCCTAAAGACTCTGGCAAGTGCGCTAGCCCAGTTTCATTGATAATGCCTGCACATCATGGTTCACCAGCAGCCCCAAACATCTAAAGACCAAGCAAAACAAGAATTGTACTTAAACTCCCCCCTCATACTCATCTG…
115	sf004252_02GT	ATATACCAGTCTATTCCAATACTGAAAGGCTGAATAAAGGCTAGGGGGGCGTAAACACCTGTCAGAACCTTAAAAAACAACAACAGTGTAACCCCAAATTGGACCCAGTTGACACTGTTAGATAACAGTCCCTGCGATGTTTCTTCATTTCCCAAGTACTGTTGGCTTCCCCAATGTGAAATATAGAAGGCCACTGATCACAGTAGACTACATTCATTCTGAGGAGGTATTAAGTCCAGAATGAAGGCTGCTGTGGCTCTGCTGGTGTTGCTGTTCTGTCGGTCTGGGGCATGGGCTCCAGTGTCTGAGACATGAACAGTGCTGATGTCTCCCTGCGTCTCCTATGATGCAGGTATCTTCACAGCACCAGTGAGAGGGATCTACTTCTTCAGATTCACT…
116	sf004257_02CG	ATGTCTATGAAATATAACCATTTGGACATGTGTTGCTTTTATTAGTCATGGGTATATACATCTGGAGTGAACATGTAATTTAAACAATAAATAGTGGAGAGAAGTAGAAACAGAGAGAAGTACTGCAACAAAAAGTGCAAGTTAGACACTATTGAACTACTGGTATACTTTGAGTGTATGTCAAGTTTTATGAATAATTAAAACATGTTATATATACGTTATTGGAAAATACAATCAAAGACGTTCCTTTATAGTTCAGTTACTGGCTTTATGTTCCACAAGTGGCCCAGCGTCGTCCGGGTTTGGCCGGTGTAGGCCGTCGTTGTAAATAAGAATTTGTTCTGTCTTGCCATGTTAAATAAATAAATACATAAAACATGTCTGTAATGTTTTTGCAAG…
117	sf004260_01AT	TCTTTTCAGAAAGGGATGTGCAAGCACAGACACACTCCATTGAGTTGTATGGAAATGATCATGGATGTCAAAGCTGCAACTGGACCATGTGTATGCGTTTCTAAGTTTAGTTTAATTTAGAGGCAGAAGTAGCCTAGAGGTTAGAGAGGCAGACCAGCAGCTGGAAGTTTGCTTGTTCAAGCCCTGGGCAGGGCCACACACAAATTGGAATGGAACAGAACTGGCAGATGGAAAGCTGCTGGTGTCTGATCCCATGTACAATTGCTCTCCTTCCGCTGAGGCTGACTTGTGGGCATTGGGAACGGCAGAAGACAAATTTCCGTTCTAACTAATGAACAATAAAGTTATATTTTGTATTACATTCTAGTTTAGAGAGAGTGGGGAACTGGATGTAACACC…
118	sf004299_15GT	AGTGTGAATGATTGAGATATTCATACATTCGTGTCATGTGTGAATTTATGATATATATTTATCACGAGGTGAAGTAATCCATTATAATTCCTTGTCTTATTTATCGGCAAAGTGCAATATGTACTGTTGCTGAACTTGAAACAGTGCAGGTTGAGGGCAAATATTTCAATTGAGTTCAGTTGAATTACTGTAATTATATATCATATCTTCTGAGGCAAAAACTTTTTAAAATAATAATTTCTAACAGTTCCAGGATATAACAGGGGGATTCCAATATTCTCAAACTGTACTTTTTACTGATTAAATCAACTGTACATCTATGTACTGTTTAACTAACAGTTAGCATGGTGTTCTATCACTTCACTGATAAAAGCTGAACAAAGTAATTTTCTACCACTT…
119	sf004387_01AG	GGGGGAGGCTAATTTATCATCCTCTCTTAATTGAGTCTTGTATTTAATTCCACATTAAAGCCCCCCCTTTTCCTGGCACGTTTTCTAGTTTACATCTTCTTTAATTAAACTCACGATCCCAACAAAGAGCGGAGGATGTTGAGCGCCGCTCCGAAGAGTGTTTTGTTTGCATCATTAGTGCTGCATCTGCGAGAGCCAACATGGTGTCCGTTAAATCCCAAATGGCATTCCCGTGTACTGGGAATGTTGCCTGTATCTAACACGTAGGAAAGGATAAGGATTATTGCTGTTTCCTGGAATCTGAACACCAAGGCCATTAGGGTACACTGTTGCAAAACATTTTGAATGGGAAAATGAAAACGGGTTTCTTACTGGACAAGTTCAGTTAGTACCTAGGGG…
120	sf004426_01AG	GGTGCTTGAAAAAACATTGTTTCGTTTGTTATTGCATTTTCGTCTGCAGAGTTGCATCAGGTAGTGGTTAGAAGTGTCGTGCTTGGGAAAGGATGATTCTAAAACACAGCGTGAGGCAAGGATTCTGTGGAAATATATCCAGCGTTGAAGGGTAGTGTTTAGAATGGGAATGCCTCGTTGTTTTCATCTCATTCACATTACTCAACTTCATCAATTCAGCAGCAAACTCTCAAGTTACTCTCAGCAAAGCCCTACATCTCTGATTTGAGTTGCACTGAATATAGATGAATACAGGCAGCCTACACATTACACACACAACACCCCGTAACAAAGCAGTGCTTCAGTAGGAGACTGATATACTGCATCAGACAGTACATGGGGGATTTAGACTGCTCAGGG…
121	sf004438_02CT	GGTGGGTCGGCATGAAGAGCTCGAGTTAGATAAGAAGTTTCTGGAAAATCCACAGTATGACTTTCTATCACGGTGATCTTCATAATCGCTGTCATAAAAGTCTTCACCCGTGTAATATTCATGGGTTACAAAATCCAAACCTTTGTGAAAAGAATGGAAATTGTTAGTAGCCTAATTCACAGTAAACAATAGAGCTAGATGTTGGGAACAGCATAGATTCAAACAAATTTTTTCCGTCACATCTTGTTTAAATATGACCAATCTTTCCAGGTCCAGTGACATTTATTAATTTTGAAACAAGGCGACTGACGTGATACAAACATGTTATTCATCTAATACATATTCTGATAAGTCATCTCGGTATAAAAATCCTAATAAACACACCTTCAATCCCCGCA
122	sf004529_01CT	CAGAGATGGAGCTTAAAAAGAGCTTGGTTTTGCTTTCTTAATCGAGATCGTATGGCTGCACGATTTGGACAAAATATCTAATTGCGATAATATGGCCAGATATTGCAATTGCGATTATGAATTGAGATTTTCAAGCACTTGGGGAAAACCTGGTAATTCCATCAGACAAGTGACTGGTTAGATAACGTCGCTGCTAAAATGAGATCATATGAATGAATAGATACTGTGCTAACTGAATACAAAACCAATTGAAACAACATATGCTAATAGATAGGATTATTACACCTGCATATTAACGAAACAAACATACATTTTTAACTCGATCATCAAAATATCGTGTGCTATAAGAGCAGCACTTAGGTTATTAATGTTAGTAATTAATTAAGTTAATTATTTAGT…
123	sf004545_01AC	TATTTCATATCTGCACAAGTACAATGTAATTACCAGGTGTTACACAGGATTTGGCCGGTGATAATGAAGTCTATCTTGAGGGGTACTTACTTGTAATTACAGTGAACCAATAGCCACTGGTGATAAAAGTACCCAGTTGTTATACTTCAGTAAAAGTAAAGACACCTTAATAATAAAAGTGAAAGTCACCCAGTAAAATACTTGAGTAAAAGTATAAGGGTTTTAAATATACTTTAGTATCAAAAGTAAAAAATATTATTCACATTCCTTATATTAAACAAACCAGATGGCACAATTGTAAACAAAATAAATTACAATAAAAATAAATAAAAAACATGATTAATAGCCAGGGGCACACCAACACTAAGACATAATTTACAAACAAAGCATTTATGTTTA…
124	sf004562_01AG	GGGGGAGCTCTGTGGCCCCTCCCACTCCCAGGCTCCTGCCTGCCATACCTGTCACAGGAGAGCTCTGTGGTCATGCACCCTCCACTGCTGTGCAATGCAACTTCCCCGGGAACACCTGCATCTCTAGAGAGAGATAGAGGGATAAGAAGGGAGCAGTGGAAGAGAGAGGGACTATGACCACTACACTAACAAATGTACTATTTTGGATTTACTAAAGAGAAGGGTCTCAAGGGATAACATGCAAAGCAAAACAATGCATGGAAAACTCTAGGTATTACATTGGTTACAGTATGCGTCAAGACAATGATTCATTGCAGCAGATGCTGCACTTTAGGCAGATAAATGTTGAAGGTTAATAACAGAATGCACAGAATCCACATGTTCACAAACATACAGCAT…
125	sf004602_04AG	GGAATGACCCAGCTTTCCTCATTTTCTTTGTGACCTGTGACCACTATCCTGGAGTGGTAAGCATTGATAGATGTAAGCCAGTGGTCATTGGAACTATTTTCACTGAGTCATGGATTCCAAAGTGTGTCATTTTAATATGTCGTTGTTTGGTTTCCAGGTGTTTAAGGATGAACTGGAAGGACTGATCCAGGATCAGATGACAAAGGGCAATAATCCAACAGGGCTGCTGGCTCTGAGGCAGATCGCTGATCTGATCATGGCCAGTTCTATGGGAGGGCCAGGCTCCTTCACATCTCCTCTCAGTAAGTAGCTGTGTGCGTGTAGGTCTGCACATTCTGCATAGTCTTTCAGTGATGCATCCTCATTCTCTCTGCATTGTCAACGTTTTGGGACATGGAA…
126	sf004632_01AG	GGATGTTGTGAAATCAGTCTCCAGAGAATTCTCTCTTTCTTTCTTTTGTCTCTTTTTTCTTTCTTCTGTACTTTTTTCTCTCTCCATTTTAGTCTGTAATTCTGTAGATGTTGTAGACTTTTTTTGTCTGGTGATACCGGCTCTCTTTGAACCAGACTTGTTTTTCTCAGAGTAGGTGTATAACGTGGAATGTTTTTGATAATGAAATAATGCTTTTGATGCTGTCACTCTTTTGTTTCTGTGTAATTGAACAACGATAACTAAGAAGTAGAATTATAAATCTATCGAAAGAAACATTTGTCTTTCAAGAAATAAGTATTTTGCTATTCTTTGTCATTTGATGCTGCTGTAACAGTAAATATATGCTGACTTTCTAGAATCGTATGGCTGTTTTATTGT…
127	sf004642_07AG	GGGGAGGGCGCGCTGAGTGAGAGAACTGGGAGTCATTGGTGTTGTACTTTCTCCCCGCTCCTCTTATTTGTACCTATCTGTGTGTTTTGCTGAAGGACCTTGCCGTTCCTAAGGACTCTGATACCATTCTTCTCACTGACGTAAGTGACTGAAATGATTGGATTTTTTAAAAAAATGACTTTCTACTGATACTCTATTGCTAACAATGTGGTGAACCTGTGTCTGGGGTCTAGGAGGGAGTCTGTCTACAAGTTCAGAGACTTCCGAGATACAGTATTTGGCTATTGAGTAAAACCTGATCAAAGTCTAATTGACCTCCAGCATCTCAATTATCTTAAACACAATAAAGCACTGTATCCAAGTGTATTTCTGGTACAATGAAGGAAGTAGAGATGTCCA…
128	sf004684_01AG	TTAGTCGTATGTATGGGATACGCATGTTATACGCATGGTATAAATCGTCCAAGGAAATGCTTACTAACACTTTCTGTAGAATGTTGTAGTATACAGTATACAACAGACCACAAAAACATTACAGTAAATACTTAATTTGCATATACCCTAACAATTCCCCTCCCATTTATCCCAATTTGTGTCACCCATAAGTGAGAAACTGACATGCCAAGGATCGACCATATATTGTGTTCCCTACAAGTTATAGAAAGAGTAAAAGCTCTAAACTGTCGGATTTGACTCCAGTCTTACCAACCTACAGTTTATGGAAAATGTGATTTCCTCAAAGACAAAGCCCTCATTGCTATGTCAAATATAATACATTTTAAAAACACTATAGTAACGTCACGAAAACCCTAG…
129	sf004732_01CG	TATCGTCTCTACCTCGTGTTGAGATTCAGAGTTCAAACCACTTTAAACGTGCAGCTGCAGCTTCACAGCTTTCTGGTCTGGAGTGTACTTTCTTAACCCATCATTTATACAGTTTGCAGGAAAGGGGCGGTTCTGGCAGGCTGACACGCTCTCTGAACTCACTCAGGGCGGTAACTATTCACTGTGCAAAGTCCATGGTTAACAATTATCTCTTATAACTTCTCAAATCACATCCGCCTCTTAACAAAAACACTTTCATAATTTTTTATATTACATGCAAAACTCATAGTATGGAAACTTCATATATGTAGTGGGTATACTTTCCAAGTTACAGTATTTCCTATTTCCTAAATTATAAAATTTTTAATGACATCACAAAATTACAAACAATATGACATT…
130	sf004762_01AT	GTCACAGATGAGGTGGAGTATCTGGTTCAGTAACAGTTAACGCGTTAGCAAGGTAACCTTAGCTGGTAAAAGTTTGTAGCTATCTAGTTTGCTAGCCAGCCACGTTTTCACCAGCAAACTCGTTTTTCGGCCCAAATGTGTAGTCACTGTCTTGGTTTTGGTCACACGAAGTTAATTCTTCAGCAAACTAATTTCCTTATTCAGCTGAACCAACATCAGACTCATAACAGCAGCAGAGGAGTCTTCTCATCGGCAACTAATATCTAGACAATGGTGGATAATTGTGTCTGAAAAGTCTCGTTACTCAACATTGCTGCAAGCGAAAACAATTATATTCATGATATATGAAATCACGCTTCTCAAAAAGTATTGAATATAATTTCGATTACTGTTAAGTAT…
131	sf004765_01CG	TGACTCCTCATACTGCTACAGTGTTACTACAGTATAGTACTGTCAGCTGAGTCCTCATTCTGCTACAGTATTACTACAGTATAGTACTGTCAGCTGACTCCTCATACTGCTACAGTGTTACTACAGTATAGTACTGTCAGCTGACTCCTCATACTGCTACAGTATTACTACAGTATAGTACTGTCAGCTGACTCCTCATACTGCTACAGTGTTACTACAGTATAGTACTGTGTACAACCCTTTATAGTGCTGGCCTTAGATTCAGCCCTCATTTATTTCTTAACATTGGTTGTGTGACTCACATGCTGAAAATGTAGTCAAAACCACAAGGGATGACAACAACAAAGGAAAAAGGAAGCTTCACTTGGGTCCATGTCATTCACTCATTACAGGTGCATT…
132	sf004817_02GT	CCTCCCCTTCATCTACACTGATGAAGTGGATTTAACAAGTGACATCAATAAGGGATCATAGCTTTCACCTGTATTCACCTGGTCTGTCTATGTCATGGAAAGAGCAAGTGTCCTTAATGTTTTGTACATTCAGTGTTTAATTAATTTATACGTGCAAAATGGATGTTGCAATTAAGGATTCTAACTTTAAGCTGAGAAGTTCATGACTATGCATCTAAAACATGACTAACTGTCCCTATTCCTGTTAGAACATTCCTACATGACTTTACCATGTTGGCCAGATCACAACGACTACCACTGTATTTCAAATACACAGACTTCCCCTTTCTTTATGACACCCAAAAGACCGGAGATGTCACTATTTTCCCCAGTGATGGTTACTATGGCAACGGTCCGTTT…
133	sf004818_06CT	ACCCTTGAGGAGAAACATTTTAAAAAGTTCTGTTCTTAATTAAATGAGAATTAGTATTTTGCTGTTTCGTATCTCTAATACATACTATGGGACAATGATCATTGATATCATATGTAAATACCCGCTAGACAAATACTTATGCGGGTTAGTAAGAATTAAATCAATCAAGGAGGAGTTAACAGGGTTTTTCACATTTAGCCATGTGGGTTTGAGATCAATTGAGTGAGTTTAAAATCAATGCATATACTCTTAAATTGATCTGAGGCCAGGGATAGCCAATCCAGATTCAAATCCCCCAAAATGACCAACTCCGAAGACAGAAAAGGTGTTAAACACTCAGATATTGTTTTACAAGACGTATATTGGTGCTATGTGGCCTTAATGGCCACACAAGTACTC…
134	sf004848_01CT	TAACTACATCACACCTGCCCAGACCCACTAGAACACACCTCCATCTCCATTAACTACATCACACCTGCCCAGACCCACTAGAACACACCTCCATCTCCATCAAATACATCACACCTGCCCGACCCACTAGCACACACCCGCATCTCCAGCGCCCCATCACTCTGTTTCTCTCCATAGCCCACTCACTTTCAATTTTTAGATAGTAAAGCGTTTGACCTTTCCATTGTGTTAACGACGAACGATTGCTTGATTTACAGTTTTTACGTATATGTTTTTTAAAAGATGATTGATGAGTAAAGTATCGTCCAACCCTTCGGGTATCTCACTGCACCCCCTCTTATGCCATGTCTTGAAATATGCAGATTTACAGATTAAAAGTACATTTACATTGTAATACTT…
135	sf004870_01CG	ATCATTCATAACACAGATGAATACAACATACACTTCACGTATCAAACGCAGACTATATCCATGTGGACCACCTATATTGCCCTGAAGTTCCAAGTCATATCAGAAACAAGAGTTTACAAGCATTAAATATTCACAGGGCACACGCCTTACAACAGAATAGATGTTCGCTTGTACAGTATAATTATTAATCCTCAGATGTGTGGGTTGGGACACATCTGAAAATCTTTTGACTGGGCAGACTTCATGAAAATCATGACAGTTTCGAACAATACCAAAGGGCTTTCAACAATGAAATACCACATCGTTTCAGAGTGCAGTGAGTAGCGCACCAAAACATGATGTTATGTGAGAATGTGTTTTGAACCAATGACAGACACTTTAATCGATGGATGCTGCATT…
136	sf004904_09CT	CAGAAACATTTCCAAAATTTAGTTTTGGGTTTGGATTACAAGTACGTCATGCAAAACAAACTCGCCCACTGGAATGTCTCCCCCAGACAAGACGTGTGGTTAGTACATGACATTGCTCGGGAAATTCTACTCTATTCTAAAATTGGCTTCAAAAATCTTGGGCAGATGGCAAGGATACGGATTACCTTCTACTCTGACTTCTACTCAGAACCTCACACAGAGAGGTGTGCATGTCAACGTGTTAGGCAGCAAAATCCTTAGATTTGGGCAAATAAGACCATAGACATAAATTACATTCGAGTTCTGGTTAGACAGCTGAAGTTGTACGCGAAACACAAATGATTTGTTAGGTAAAGTGTAGGCCTACTGTATTTATATTTATAAGCACATCAATATTAT…
137	sf004909_01GT	TGTAGATGTGTCCATAAACCAGAATACACATTTCTTTGTTGCTGGGATTTACCGCCGCCCTGCTGCCACGGCCGTTGCTATTGGTGGTATATGTGGTCATTTTAGGCGATTTGAATCTGGGTTGGCTATCCTTGGCCTCAGATCAATTTAAGAGTATATGGATTGATTTTAATCTGACTCAATTGATCTCAAAACCCACACGGCTAAGTGTGAAAAGCCCTGTTAACTCCTTAGTGATTGATTTAATTCTTACTAATAACCTCCATAAATATTTGCCTAGTGGAGTATTTGCATATGATCTCAGTGATCATTGTCCCATTGAATATATTAGAGATATGAAACAGCAAAATACTAATCCTCGTTTAATTAAGAAGATAAATGTTTTCTCTCCTCAAGGGT…
138	sf004913_01GT	TGGGAAAAACAGCACTTCTTACCTCAAATCACCAAACTATTCATGTAGAATAAATGAGTCTATTAATTTGAACTAAGCAATACGCTAAATCGTTCAGTTTACATTTAGCCTATTCTACTGTAGACTATCTGAAATTAGATGTAGGCCTATAGGCTACCTGCACCTATCTAAGCAAACCATGGCAAAGTTGAATTACAATCATAACCCCAGATTTGAGTCTGTAGCCTATGCCTATTAAAATGACAAGGCAATCTCACAAATGGTCAATGTATAACAGTTTGTCATCTTAACATCTGGCTTCATAATAACAGCAAAATTGACAGAAAATAGCCAAACATTCGTTTTTTTGTTGTCCAAGTGTTTCTTGCTCAGAGATTTGTAGATCCTCCGTCCCTGAAC…
139	sf004975_01CG	AAGGAATTTGGGACATGTCATTCCAAGCTCTCTCTTTTGACCCATTTCACCTCTCACAGCCTGTTGACATCTAGTGGAAGGCGTATGAAGTGCATGCATATCGATAAATACAAGCAATTGAATAGGCAGGCCCTGAAACAGAGCCTCGTTTTCAGATTTTTCACTTCCTGTATGGAAGTTTGCTGCAAATGAGTTCTGTTTTACTCACAGATATAATTCAAACAGTTTTTAGAAACTTGAGTGTTTTCTATCCAATAGTAATAATACTATGCATATTGTATGATCTAGAATAGAGTACGAGGCCGTTTAAATTGGGCACGATTTTTTTCCAAAGTGAAAACAGCGCCCCCCTATTAACAAGACAAGAAGTTAACAGTATTTAGACACTGGTTCCAAGTT…
140	sf004977_01AT	GAGATGTTAGCATGTTCCAGAGATTTCTGTAAGTCTTTAGCTGACACTCTATGATTCTTCTAACCTCCTTGAGCATTCTGCACTGTGCTCTTGCAGTCATCTTTCCCTTCCAGCCACTCCTAGGGAGAGTAGCAACAGTGCTGAACTTTCTCCATTTATAGACAATTTGTCTTACCATGGACTGATGAACATCAAGGCTTTTAGAGATACTTTTCTAACCCTTTCAAGCTTTATCAAGTCAACAATTCTTAATCTTAGGTCTTCTGAGATCTCTTTGGTTCGAGGCATGGTTCACATCAGGCAATGCTTCTTGTGAATAGCAAACTCACATTTTGTAAGTGTTTTTTATAGGGCAAGGCAGCTCTAACCAACATCTCCAATCTCGTCTCACTCATTGGA…
141	sf005000_09CT	ACTTTAAACTATGCCACTTTTATAATGTTTACATACCCTACATTACTCATCTCATATGTATATACTGTACTCTATACCATCTACTGCATCTTGCCTATGCCGTTCTGTACCATCACTCATTCATATATCTTTATGTACATATTCTTTATCCCTTTACACTTGTGTGTATAAGGTAGTAGTTGTGGAATTGTTAGGTTAGATTACTTGTTGGTTATTACTGCATTGTCGGAACTAGAAGCACAAGCATTTCGCTACACTCGCATTAACATCTGCTAACCATGTGTATGTGACAAATAAAATTTGATTTGATTTGAGAGATGCCTTTAAAGTTGAGAAGACAATAACTAACCATGACATATTGGGTAAATCCTCAAGGATATAAGGTCACACATCCTGCTG…
142	sf005054_02AC	GGGGCAGCTCCCTCAGTGAAGAGGTGGCCCAGCTAAAGAAGCTGTTCTCAGAGCAGCTGCTGGCTAAAGTGAACTGAGCCCAGGACTGTGTCAGTGGATGCTCGGTGAACTGTCCCATCCCAGAAGAGGAAGCTCAATCTGAGCTAGCATACTAATATAAGCACACACACATGGTGAAAATGAGATAGAGGGGAACAGAGACTCTAAACACCACAGTACCTTGGCACACTGAGCTGCTACGGTGACAAACCAATGCCCTGGGCCAACTGGACTATGATCCACCCAACTACTCAATTCCAACTATTTACCTTTATGTTTAGGAGTGTGTGTATTTTTACCCTCTAATTTTGAGTTGTCCTGATTTTCTACTCTTAAATCCTAAACGCTTATCTGCGCCTC…
143	sf005079_01AG	CTTGGCCAAGATTCCGATGGAAGCTCGTCGAAAAGTAAGAGCTATTTATGATGTTATTCCGTTTTTATGTGGAAAAATGTAAACTCAATAATGGTGAATAGTGACGCCGTTATTGCGTCACTAGTCTGGCTGTAACGCACACTGTATGTCTAGTAACGTTAATTTTAAAAATCTAACACAGCGATTGCATTAAGAACTAATACATCTTTCATTTCATGTCCAACCTATATGTTTTAGTAAAGTTTATGATTAGTTATTCATTACGCGAGATCACTGTCCAAAATGGCGCCCGACATTTTCAGCCCAGGTTGGCTACTATTCTCATTGTATAACCACGTTTTTTGTGGCTAAATATGCACATTTTCGAACAAACTCTATATGTATGTTGTAATATGATGT…
144	sf005138_03AG	GCATGACCACAAATCCTTCTCCCATCAGTCTGGGCGGCCTATGGAGGACAATAGAGGTTGTATTCTTTTGGATTAAGAGGCTAGGGTTTAGGGTCGATGGTCAGCTCACTTATCGTTCAGCGGGCCCATGTAATGGGGGTTAGGATTTAGGGTCAAAGGTCAACTTACTCGTCGTTCTGCATGCCCAGGTAGCGTGGGCTGGGTACGAGCATGACGCGGACATTCTCCAGAGAGCCCTTGACGATGTGCATGTATTGGTCCAGGTGGCTGGAGGGGGTTTGGTGGCGTAGGTCAGGAAGGCATCCTCAAAATTCACACATATCGTCTGTGGGAGGTGGTGGTTCCCAAATGCTAAGCGACCCTGGAGAAATGCACACGATACAGTGATGAGAATTAAAC…
145	sf005248_01AG	CAGAGATAGAGCTTAAAAAGTAGCGTGATTTAGCTTTCTTAAATCGAGATGGTAAATCTGTTTCTCCATGTCATGTAAAAACACTTGAGAATAAAACTTTTTTAAATTTCTCTTCTTAATTAAACAAACGTAGTATTTTGCGGTTTCGTATCTCTAATACATACTATGGGACAATGAACACTGAGATCATATGCAAATACTTTTCACATTTAGCCGTGTGGGGTTCGAGATCAATTGAGTCAGATTAAAATCAATGCATATACTCTTAAATTGATCTGAGGCCTGGGGTAGCCAATCCAGATTTCAATACCCTAAAATGACCAACTCAAAGGACATAAAAGGGGTTAAACACTCAGGTATAGCACTAATGGCATCCACCATGGCAGGGGGTGGTGGTAA…
146	sf005272_01CG	AAAGACAACCCCTGGATATGACGCTGAGCACGTGCACTCAACTTCTTTGGTCGACCATGGCGAGGCCTGTTCTGAGTGGAACCTGTCCAGTTAAACCGCTGTATGGTCTTGGCCACCGTGCTGCAGCTCAGTTTCAGGGTCTTGGCAATCTTCATATAGCCCAGGCCATCTTTATGTAGAGCAACAATTCTTTTTTTCAGATCTTTAGAGAGTTCTTTGCCATGAGGTGCCATGTTGATCTTCCAATGACCAGTCAGTATGAGGGAGTGTGAGAGCGATGACACCAAATTTAACACACCTGCTCCCCATTCACACCTGAGACCTTGTAACACTAACCAGTCACATGACACCGGGGAGGAAAAATGGCTAATTGGGCCCAATTTGGACATTTTCACTTAG…
147	sf005409_04AT	GATACAACAGACAACCTAGCCTTCAAGGTGAGTGCAATGGACCAGGGTCTAGAGACCACCACAATTAGACTAGAACAATATAAAGTAGGGATCAAAAACACTTTAGATGTGGGCCAGACCCCATATGCAAGATCATAGAGATGAGAAGCAAAGCTGCCACCATTTCTATCAATGCACTCTCATTCCCCCGGAGCAGCAGTGACAATGTATGAGGAAGGCCTTGATTGTATTGGCTTCTGTCCTACTGAAAACACACAAATATTCATGCTTTCCTCAGGCATTTACAGCCTCACACCACTGCAGGTATGTAACATGGCATCAGACAGAAATAATTTGCAAGGCACTACTCCAATACATCTATGTTGATAGTAATAGGCTACCCATATCCTTTTTCGTTGT…
148	sf005410_01AG	ATCAAATCAAATGTTATTGGTCACATACACGTGTTTAGCAGTTATTGTGGGTGTAGCGAAATGCTTGTGTTTCTAGCTCCGACAGTGCAGTAATATCTAACAAGTAATATCTAACAAGTAATATCTAACAATTCCACAACATATACCCAATGCTCACAAATCTAAGTAAAGGGATGATGAATTAAGACTATGTATTAAGAATATATAATTATATGGATGAGCAATGTCAGAGCGGCCAATATGTCTGATTACACTTACATAATGGAGCCGGAATGGAGGCCAGCTCCAGATAGAAGTTCCCATTGGGCATGGATAGATCTATGATCAGCTTACCATTCCCATATCCAAATGTTAACTGTTGATGGAAACCATGCAAAAGGGACCATAGATCAGAACCTT…
149	sf005420_01CG	ATATCCTTTTTCTTCACTGGTTCTCAGGCCTGCATTTGCTACTCTACTTTCTCTCCACAAGTAGCAAAGGGGCTTCATGTTTCATGTATGTTAATTTGTTGTCTTACTTTGTTAGTTGCCAATACATACCCATAATAGTGTACCCATAGTATACAACTTTTCTTTTTACAAAGATAGATTTGTTGAAGATGGTGATGGTCTCAAATAATATGGATTCATGAAAAGTATTTATAATTTATGCTTTAAAACACTAAAGTGTCTGTTTTGGCCTTGATGGCATCAAACAAGCAATGCATGCAATTGTGCATTACAATAACTCCTCCAAAAGTCCTTTACTGCTTGAAGTGCATCTATGGTTTGACAAGATGGATGAGGATTGCCTGTTTTGTTGTACTGTAA…
150	sf006073_01CT	GTGAATCATTGATACGGTGTGTTTTTTATACTTTCTGATATATTTTAGTTATCAGTCACATGCCAACCGGAAGACTTGGACATAAATTGACATGCAACAGGTTCAGGCCGCACCTGGAAACCACCAGTGTCATGTTTGTTTAGTCTATGTTCACACCATTGTCTTTGAAGGACTGATACCAGTCCTTCTCATCGGGAAGAGAGTGGCCGTCGTCAAGTTTGGCCGTCGGCGAGGACTGTCCAGCAGGACCTCGCAGGCCTAGGGGGCTATCACCGCACCTGGACACTAGCAGCAAACAGAAAAAACACTCCAGGCTACGGTGGCAGCGGGACCGCAAGAGCCACACCCACTCCACCAGAACAGCCCGGATGTCCTCCACGCTGCGGTGATTGAGAAAGT…
151	sf006081_01AT	AAGGCTGTTTCATGATGATTATTACGGTCGTGTCAATCATGTTATATACTTATGCTACTGTAACAAGGGATATGCCAGCATTATAGGCCTACTGCCTCTGCCCAGAGGCCTACTAGGCTTTCAGGACAAAGGCTGTTAGAGCTCACTTTGCCACGTATGAGCCCTGGTTAGAGTCCCTGTTGCGGCTTTCACTTTCTTCCGCTACATTGGTGGCAGCGTTGGGTATCACATCCAGCTCACGTCTAGTTATGTGATCTAGTGGTGGGAAGCATTCTGTTTTTCAACATTGTGTTGGGTGTAATTACATTGATATATCTAGTGAACAATGGATAAGAAACAATGGGCGTGGCGGATAGAATTACTCACTACAGGTGTTATCAAGCCTTACATCAAAGTTAC…
152	sf000020_CT	GGATGCACTAGAGAAGGCCCTAATGCAATGATTGATAACATGCTTACACAGAGCCTCACAGAGTCTCACACTAGGTAAAGTGGTAGAGGTAGCGCTAGTGATTGGTGGAAAGGCGCTCTCAGATTATTCTTTGTGAGAGTGCCAGGTCAGTTGCATTAGGAACAGAGATCGCCCGGGAAAGGGAGAGCACACTAAAGCTCTTACCAAAGTTTAATTGAAAGTTCTGTGGGTATCCATCGTGCTCTTAACAAGACTTTAACAGTAGCAGGATGGAGAGGGATTGTCATGAGTTAACGGTTAAATAATAGGAGATGACAGTCAATCCATCAACCTTTCCTCTCAACTGTACTATGTTTCACTGAGTCATATGGGTGTTTAGCCACATAATGTAGCTCTGCT…
153	sf000062_CG	AAAAGAGAAAGAGTGAGGGGATGGGTTGATGAATGAGGATGTGGTTAATTTCTTCTCAGCAGCACTGTAACGCTTACAGCAATCCTATCTAGTCAGGTCTATTGAAAAAGAAAAGAACAAGAACCTTTACTATTGTTGGGTAATGTTTACTTTTGGTATGACACAATGATAATACAGTACATTAATACATTCGGTCGACCATACATTAAAATGTGTTACATTTTAAGCATAAATAGGGTACTATAAGAGGATTACACATTATACAAGCTCTTTCTTTAAATCGATCTTTTCATGCAACTCCCTCTCTCTTTCTCCCACTTATTAAGCTCCCTTGAAAGTATTAAAAGGTTCAGGAATGCAGGCCGTACTATATCTGAATTATACTGTGATAATAATTGA…
154	sf000132_AG	AACAGACACACACACACACACAGAGAAAAGATCATCCAGACAAAAACATAGACACAGTAACACAGATCCGCCTTGCGTTGACCCACAGTACATGCATTGACAAAGTAAACACAATCCCCCATTTCCCAAGGTCAAATTGACTAAAGACTGGCACGGGGTGTATAAAGCATAGAAACGCTATGATCTTGCTGAGCATCCCCTGATTTTGTCAGCTGTCAACACACAAACCCTGCTGAGGCACTGAGAGGATTGGATAGATGAGTGAGTTATGGAAAGCAGAGCAGGAGACACAGCGTAAGGTCATTTATGGGTGAAATATGGAACGTTTTTCATGGATTTGGACTATTCTGGTCATGTTCGTGACAGTGAAGCTGGATCTAGACGTCTGGATGAAAACAT…
155	sf000151_AT	GGGGAAAGATCTATATCTATATTATAAATTATTCGACATATTTCTTTAACAGGTTCAGGCTCAGGGCTGACGTTTGCCCAATTTTGCATCGGGGGAAATTGCGGTGTATTTCGTTAAATTATGAATGGAAAGTGATAGTGTAGTATTAGGCTACCACTACTGTTGAACTGTTATAACGAGACAGTTGTACACGTGCATGAATAATCACCACAGTAACATCAACACATGCACTGGCCATGGCGCAATGGCTGTTCCAGAACTATTATAGCTATTACACTGTTAATGTGAGTGGATATGTCCTGCGTAGTAGATAGGAACAGTATTGACTTCTCTTTATCATGTGAGGCTCAGGGCTATAGTATCACATTATTTCGAGTTTGATCAAAATTGGGGTAAGTG…
156	sf000364_AG	TGTTGCTGGTTTCCACCGCTTCACTCCACACTCTCCTGCTGAGTTAATACATCTGACCTCTGCTTAATTAAAATAACAGACTATCCTCCACTGAGAGAAAAGAGACAATTTGAGAATTATTCCAACTAATCGCTAATTAACATTCTGGAAAACAACAAGAAACCCATCATGAAAGATATATCTATTTTTAGTTATGCAAAGAGGGAGGGAGAGAGGGAGGAACCGTCAGAGAGTTATTCTGGCTAACCTAATAATGAACAAATACACTGTAAAACTCATGAAGGAAAGATCTGTTCTTGCTCTTGTGATGAGATGTTATCAAACACGTAGGAAAGAGCTAGTAATGGGTTCTAAACCAACTGACAATCATAAGGAACTAATTTAGTAGTATGCATAGGA…
157	sf000364_GT	TGTTGCTGGTTTCCACCGCTTCACTCCACACTCTCCTGCTGAGTTAATACATCTGACCTCTGCTTAATTAAAATAACAGACTATCCTCCACTGAGAGAAAAGAGACAATTTGAGAATTATTCCAACTAATCGCTAATTAACATTCTGGAAAACAACAAGAAACCCATCATGAAAGATATATCTATTTTTAGTTATGCAAAGAGGGAGGGAGAGAGGGAGGAACCGTCAGAGAGTTATTCTGGCTAACCTAATAATGAACAAATACACTGTAAAACTCATGAAGGAAAGATCTGTTCTTGCTCTTGTGATGAGATGTTATCAAACACGTAGGAAAGAGCTAGTAATGGGTTCTAAACCAACTGACAATCATAAGGAACTAATTTAGTAGTATGCATAGGA…
158	sf000382_AG	AAGACAAAGATCCTATCCACTCCGCAGTTTATACTTACATGGCAAAATCAAAGCCAGACATTGAAATACAAAAGGCTGCCTATGTCATGGATAGCATAGCCTTGATCAATCCGAGATGATGATATAAGATGTAGCCAGTCTACAAACAGTAAACCACTTGAGATGTGTTCATTAGAAGTGTTTAAGAAGCAGCAACACTGCTATCGGCCTCAGCCAATTACTGTCATATAAATAGGCTACACACACCTCATCACGTCAGACAGCAGCACCATATGGCCAGCTCCTGTTAGCATGGCCACTAATAAACTGGCTCATTAGTGTAACACACAGTGTCCGGGCAGATGTCTGAACCATTGTCAGGAGGCAGGTTGTCAATGCACAGAGCATCTGTGAACTCTG…
159	sf000505_CT	AACGCAAAAACCTTATACGCATCTTTTTGTTGCGGTTGATAGTTTGATGTTAAACTCACATTTGCGAAGATTTAATTCCTTTGCAATGTTGAAAATAAGTTCTGTTTCACTCCACGCTGTTGCAAACGTTCTTTCAGGATTGTCGTCTATGCTCTTCTCACACAAAGCTTGACTGTGGATTTCTGAATGGAATCGTCCGGTTTTCCCTGAAGCAAAAATAGAGGACGCCATAATACACGCCAATTGGTTGTTACACAATGCCATTCAAGTGACTGGCCAATTGACGTTCAGAGAGCTCTTTGGACCCCAGTGACCAATGGTGAGCGAGCTTGTCTTGTTTTTATGAATGACTGCTTTTCATTCACGTCTGACGGCCAGACACTGG
160	sf000508_CT	CCTGAAAGTGGTAGACTGAACCACACAAACAACTTCCCTTTCCAGTTTTTAACCTGCGCCTCCAAGTAAAGTTAGGTAGACAACAAAAAGACTTGGCAGATCATTTTCATCCTTGTCAATGCAACTTCTTCCACCCATGAGAAATGTTACCTACTTTGCCTTGGGAGGCTAAACCAAAATTCTATACTGAACTATGAATGACCTTTGACTCAAATGTGTTGCCATTTGCAGAGGTCACAGGCTCTCAGGCGGTGGTAATTTCAAAAGAAGAATTTGTAAATATGTTTGTGAAATATTAATGCAAGCCCAAATCAATATTCTCAGGTATGCTTATAGCTATGTGTGTGACATATTCTCCCCATTAGTTTTCAGTCAGAGAGAGATGTGATGACACGTCTC…
161	sf000518_GT	TTCCTTGGTTTGGATTGTGCTGGGCCTAGTCTGCCTCTGTAGCAAGCAAACACTTGACTCCAGAAATGACACATTATGTACAACAGAAGATGAACATACCTAAAGTGTATGTTGAAATGGCCTTGAACTTTGGGACATTCAGTTTGAGACCTCACCTTCCGCAGGGCAAGACTTAGAAACTATTCCCATGATTCTCATTAGAACTGTTCTCTGCAGTGAACTCTCCTGTGTGGCACACTATTTAGGTTTAGTACATCCAGAGGATAACTGGGGGCCAAGCTACTGTAGATTCATGAAGTGGCTAGTGGAAGAAGACATCTAAGCCATATTGTACAAGTGAGGAGAAATCAAAAGGATGAGAAACCATTGAGCTCAGAAATATGTAGTCGACCAGCATAA…
162	sf000554_CT	TCCGAGGGCCTGCAGCATGTTTATGTTGGGCAGGTTGACTGTGTCTCTACGGCAGCCACTGGGCTCACGGCACACTGGCTCTCTGTCACTGGCCACTACATGCATGCTGTCTAGAGACCTGGCTAGTCTGGAGTGGCACAGGGAGCTGACGGAGGAGGGAAGGGGTTCATCGATTCATCATAAACCATGTATGGCTACAGCTCATTCTGTCCAGTTTACTTCACACACTTGTGTCAACTCTTTTCTGTATGACTGAGTAAATATAACCTTCAAACATTTGACAGAATATTCGGCTAACAGATATGAGAAATAGTATAAACTAGATTAGCATTACATCTGATAAATCCTAACTTGAGTTACCCACACCGTATACAGACTTT
163	sf000559_AG	GGCTTTTTTTCACATCTGTGGTGAATTAGCCAGATCTTTCTGATTTTGATGTAACTGTTCCTTCCTCTCTGTCCACAGGGTGCGATAGTAGGGTTGGTGGCAGGCCTGGTTATGTCGTTCTGGATTGGCATTGGTCATTTCGTGTCCCGTATGGCGCTGCCCACTACTCTGCCCCCCATCATCAACGGCACCGCTATGCCCCTCCCCGGCAACATGACCACTGCTGTCATGACCACCCTCATTACCTCGATCACCGCCAAACCAAAGTACAGTGACTTCTTGTCCTCGTTAAATTGATAGCATTGGAACCAGAACAGCAGTATCAAACATAAAGCACTTGAATTGTATCCTTCCAAAAATATTAGAACTAGTTTTAAGGATGACTGCATACGCATGGTG…
164	sf000612_AT	GCAAAATGTCTAGTTGTAATGACGTCAAAATGACATCATTATCTGTCAGAGCTGATTCTGTCCTTATCATCCCCTAGGCTAAGGAGAAGTTTGAGAAGTCTCTGTCGGAGTTGAGTGCGGTCACTCCCCCATACCAGGAGAGCATGGAGCAAGTGTTTGACCAGTGCCAGCAGCATGAGGTCAAGAGACTCACCTTCCTTAAAGAGATCCTGCTGGACATTAAACGCCACCTCAATCTCACTGAGAACCAAAGGTCAGTGACTGGTGTTATCCTCTATCGTCCCATACATACTGCAGCCCATCCTCTATTACATAACCTACATCAACCTATCCTCCCACATGGCCTTTGAATGAAAGGGTTATTGAGGAAAACATTTCAGGTGGTACAGGATCAGACTT…
165	sf000656_AG	TTACATCCGACTGCATATGAATAGAGTGTATTTATCTCTGTTATGTAACATTCAGTAGAATATTATCTCGCTGTATTCTTCACTTCATGATTGGGAGAAATAATTTATTGGGCGCAGGAATCCAATCACGCGTAAATCCTTACTTCTCTGGATATCCGACAACTTTTGGATGGGTAGGCGTAAGAATAGATAACAAACAGCTTTTTAATTGGTTTATATTTTTCTTGAATCCAATGGTAACTTGGACAGTAATAAAGAGGTACAGGTCCTCACCCCATAGCATACCTGCGGCATTATTCTAAAAGGAGGGATGAGTCCACGATGTAGTCTACCTATAGCCTACGTCATATTTTGAG
166	sf000684_CT	AAAATCTAGGTGCACTGACTGACTAGGTATATATGTGAAACTTTGTGTAGGCACATCCCAAAGTATCACATTTTAACAATTCCGTCATCCTTGTTTTGTATAATGAGTAGGCCCCCGGTGGTGCGTGTATGCATAGGTTATACAAATAGGTCTAAGTGTAGCAATAGGATAGCCATGTTTTACAGGTTCAAAAGTGGAGCATGCCTCTGTTTTTGTTGACATTTTCTTGGTACTAGGCCCACATTGAACCATTTCCATTCCAAGAAGTGTCCAAGTGTTCATAGCCTATATGATATGAATACACATACACACACACCACTACTAGGGCTCCTTAGTGGCGCAGCGGTCTAAGGCACTGCATCTCAGTGCTTGAGGCGTCACTACAGACAC
167	sf000744_AT	TAGTGTCACTGGGGGGTTGCAGCTATGTCACAGGAAGTCCTACACCATGATGGAGAGGGGGATGTAATACAGTACGTCACATGACCTGGCTGAGATGCCTTGGAGGAAGCCAGAGGGTGGGGGACCGTAGAGAGCTCTGTCTGTCACAGTAGCTTTCCACAAGCGGCCCAAGCAGCAACTCTGCAACAACTCTAGTGCTTCACATTGGTGGAAGGGCTTGGTCAGGGAGTTTTACATGTGCTTTGAACTGAGAAGGTAGGCTCTGTTCTCATTGATTTGCTATTGGTACTCTTAGTCTGTGGAATTCATCATCACCAGTCACTTTTGGTGGTTTATTGTCTTACATGTCAGCATGACACTCGGTATGTTCTTCCTCTGTATCTTGAGAGCTGTGCTAAA…
168	sf000754_AC	CACACCGTAACGGGTATTGATTCGAGGTTGGATGCACACCGTAACGGGTATTGATTCGAGGTTGGATGCACACCGTAACGGGTATTGGATGGTATTGAAATGGTAAAAAGCGTTCAAAGCCGTTGTAAAGAGGATGATAGTTGTTCTCTATTATCCAAGAGGTGACCCTGTTTAAAAAATACTAGCCTAGCATGGTTATTACCATCCTAGGTTTACTGATTTTTCTATAACTGCCCTATACCTGACTGGGTATTGAACCAGGGTCATCTGCATGACTAAAGGCCATGTTAGCCAGCGAGCTAAAGTCTAGATATGAGCTCTAGGTGTTAACACGAATCCAAGGCAGGTTTGTGTGTTTCACCGAACTACCTACAGTACATTTGTAAAGTATTATAACCT…
169	sf000899_CT	GAGAACAGTACCTTATTCTGTACTATATAGCAGAAATTCCAATTCGATTATTGAATTCAATCATGAAGTGAAGAACCTACGTTGAATTCTAATTTCAACAATCTTCAAGTTATGAAATGGGAATAGAATTGGAATGAGACTGTTTATATTTTAATTGAAATTGTTAAAACATTTGATCTTTGGAATTCAATATTTTTACATTTCCCAGTTATTGGAATGACTGCACTTAGTATAAAAACAATTAACTGCAGGATTTGTTTTAAATCATTTCAACATGTATTTCTATATTTCCAATACAGCGAGGATGTCTGAACAGTTCCACGATCAGCCTGAAAGCCTTAAAAAGGAATTTATTTGGAAATTGAATTCTTGGAAATGACCTAACATTGGAGTTGAGGG…
170	sf000991_AT	GGGGTGGGACCCAAAAGTATAATCAGTGCTCTAACTCCCCCTTGCGCTGGTCTGGAGCAATGAAGCAGGGACGCAGGGTACCGTAATAAACCACTAATTACCTCTAAATCCTGCAGCATAATCTCAAAACCTTTAATTGAGGAACCACTGTATGTACTAGCTGTGTGATTATGTAATAGTCATGTAATAGTTGTGTGTAATGAAATAGTTATGGAACAGTCACGCGGTTATGGAATAGAGCCGTAGTAGTCAAGTTACAATCATAAAATAGTCATGTGTTGGTCATGTAATAGTCATTTGCTGGTCATGTGGTTATGGGATAGTCATGTGATATTAATGTGGTCATGTAACAGTTATGTAATTGTTATGTAATACCAATGTAATAGTCATATGGTTTGG…
171	sf001105_AG	GGGGGGGCAAGACTCCCCAATCCTGCTCCCCCTCTCTCTGTGCCACTGTTCAAGACGTCCTGCCCCAGTCTCAAAACCAAGGCTACTTATGTTGACTAACACTTACCACACATGGCACATGAGAGAATACTCATCAAACTGAGCTCAATAAATGTTACATATTTCATTGGCTGTAGCATTATATTAATAACTCCCCTGTAGTGTGTTGATGATTGGTGCTTTCAGAGACATACTTCTGAACAATAACCAAGAATCAAAGGGTTCATCCTTATGGACCTTGTATTTAGCCCCTTGAATCAATTAGA
172	sf001196_AG	GCCCATTCACAATTTGTTATTCTTCAACATCCCTTGAAAAACAATGACAACTGATTATTTATGATCCAATTTTCTGTGTGGAGTGGCAGATCGTTTATCTTTATAAGTTGTTACTTTGCATTTGGCTCATTTAGCCTGAGGATATTCAGATTTTCATAAGGCACCTAATTTGCAAATAGGCAAAAGGGCTTGGCCATTGTTGAGCCTCGCACAAACACCACACTGAAAACCACATTTGCATTTTGGGGTCACGGGCTTGTAATATACAAGATTAAATCCATCATAGATCTATGCCACAGCTTAATTAATGGGATACGCTGTCTGAGGCGAGATGGCGAAAGGTCATTAACGCAAGCAAGAAGCAGAGGGATATCAAAGGGATAGGGATGGCAAAGGTGA…
173	sf001287_CT	CGTGAAATAAAATAAGGGGAGAGGAACTACAAGGAGAAGAGAAAGAGAGAGAACGAGAGAAAGAAAGCTGGGCATCAGAGCAGGGTTGGTGCTCCCCGCTACACCGCAAGTCACGGACATGCTTCAGGGAACTTGTAATTCCATATCGATAAGGTACGTCTAATCACATGAATCAATCATCTCTCTCTGTCTATATATCGACCAGGTTTGTTTAAAATTAAAAACATTTCAGTTTCTGGTTTCATTATTGAGCTACTTTTAATAAATGAATAGTCTCTTCGAAAAACCGTAAGGGATGCGTTTTGAATTCGCTTCTTAATTGAATATCGATATTACTTGAGATTTTAAAGTCTC
174	sf001288_CT	ACACACCCCCCCCCCGTCCATCCACTCCACTGCTGCCAAGGCGACTACGCCCACATTACAATGTGTGATCCTCCCTCTCCAAGAGCCGCTCACGTCATTGTGTTCCCTCTGACTGCACTGTAAGTAAAAAATGGGCAGAAGGAAGGAAAAGTTGGACAAAAGAAAGTTGTCCACACTGCCCCAATACACAACAGATGGGAGACGGGCTTTCCAAGACTGTTAGTTACTCCCGTTCCCATGGAGACAAAGCTGCAACGATAAAATCAGTTTATGATCAAATCTTGAACGGTGTGGTCTTTGTTAAGCGGGGCGGGGGTAGAATAGCTGCTAGACTTAAAACATTATGATCGTTTATGTACAACAACATTGGATGTTTGGGGTGTCAAAATCTAAAGTAAA…
175	sf001353_GT	ACAGCAGTACAGGTATCCACTCAGAGTAACAGCAGTACAGGTATCCACTCAGAGTAACAGCAGTACAGGTATCCACTCAGAGTAACAGCAGTACAGGTATCCAGACAGTAACATAGAACAAGGGTTATAAAACATGCCACAGTGCTTTCATTCAGTCTGATATCATATATGAAGCTCAGGTTCAAGTGGAAGAAGAAATACATACTTATCAATAATAGTCTACACAGCAAGGAGTTGATCATCATAACAGTTCTGAGAGTCTGAGGAAGTGTTGTTCATCATCATAAGACTTCCATACAGTAGGTGTGTTACATAGGCCTGTTCAGATACACTGAGGAGAGTCTCCATGCTCTATGGTCCATAGTAAC
176	sf001359_AG	GGGGGCCTACCCCTTACCGGAGTGCTTATAGTACAGCACCATGGAACTAAGAATACATTGATTTTGGGTGAGCCATGTGTGATATAAATGACAATGTGTATTCAAAGGAAAGGGATGTTTGATTTTTATGATAAGATCAGTGTAACTCTAAGCTATTCTCTCATGCCAGTCAGCTGCACACTTAAATGTCATTTCCAAGCCACCTCTGGAGAAATGAAGGAAATTCAGTTGAGCACGTTGGATGCTATCACAATTTTCGTGAGTTGGCAAACAACTGAAATAAATGAACACTCAATTCTGTATTATCTCCAAGTCTGAGACGACCAAATTTGTTAAAACCAAGCAGAGAGAATCATTAGATCAGTTGTTTTGGTACTGTCCATATGTAGCTTGTTTTTG…
177	sf001394_AT	GACGGACATGAGGCCTTGGCCAATGGGATGGGCTCTTAGTGGGGCGGATGTGGGTGAGTCATTGACCTGAAGCCACTGGATTCTAATACATTAATGTTTCCATCTTAATCTCTCACCTCATTTACTCTCTCCGTTTGGTGAGTTTATCCCTGCTTATTTATGTCATTGCATGAAGGTCATAGCAAGTAGCATGTCAATCAATGATTAACATACAAGTGTTTAATGACAGTAGGTTATAAACTTCTATTTGTTCTGAAGCCCTTGTCATGTCTTGTTTCTGT
178	sf001546_AC	GCAAAGACATGACGACTGACCTATTCCCAACACACATACAATACAGGGGCTGTCAACAGACAAGTAGTCACAAACGCAACCACACACAACCCTCACTCATTAACCCAAGTAACACCACCAGTTACCCAGCAGAAGAATCCAAATGGCATTGTATTGTTGCTACAGCAGAAAGCCTGTTGCGCACCATCACAGCTACACCTCGTACCCCACCATGCAATCTGGCTTACTCACCATTATAGCAGCAGAGTCCACAGAGACTGAGAATATATGTTGAGTGAGTGTGTGACAGCGTGCACTAGAAGTGACAATCTGTGCCTCTCCCTACTTAATAAAAGTGGGTGAATCACTCTCTGCTCCCCC
179	sf001667_AG	TACTTTTCCTAAACCAAGATCAGCCTCTCACACAAACTGTAGTCTTGCTAAACAACAGTTAGCTATGTTGAATCTAAACCCGGCCCTTGCAAGTGCACATGCAAGTGCATTGGCTGTGAATTGCAGTGACTCTGCACATGCCATCTAGCTAGCAAGATCAACACACAAGACAGACCCATTTCTGCTTGAGCATCTAGAACAAATTCCAGCCCTTACCTTATGATGCATTAATTCAATACACCCTCTTCTGTCAATGCCATTTTTTTCAAACCATTTAATCAATGTACTTTAGGGTTTCCTGGAAACCTGAACCCAGTAAGCAAAATTATGTTTAAAATACGTATTTTCCAGAGATTGAAGTTGGGTTCAGTTTAGGTTCTCAATGAAAGGTGAAAATAT…
180	sf001812_AG	AAGTCAGGAAGCCTGCCCCATCTGCTGGAACCAACCCTTTCGAGCAAAAGGTTCGAATGATGGGTGAAGAAAAAACACATTAGACCAAAAAAAGCGTAAAGCTGCAGTTGCACATTTTAAATGGTTTGAACATTGAATCTTATCACGAGGTTGAGATGATAAAATCACCTCCAGGACAATCACTGGTACAGCTGATTAGCTTCCCAAATAAATCATCTTCTAAAGCGAATTGAAGTAGGACCATCCGGTTACTCTGCTCAAACCATGGTATTACGCTACTCTCATCCCCTCACTGGGTAACCATCGATACGGCTGGCTAGCCTATCTTCAAAGAAGCATCTTCAAGAGCGAATGGAAGGAAAATCAACTCTGTAGTTTTGTTCAGGACTACAAGACAAG…
181	sf001831_AC	CAAACTTAGACCAACGGAAATGAGCATTTCCATCGTTTTTTTAAGACACCTTAATCCATTGATGGTATGTTGATGTACAGATAATTTAATATTATAGAAGCTACATTTAATTCAACAAACATTTAAACCTGTGACTTGAAATGAATTTATTGAAATCGCAAGTGCATCTCTGCTTTTTCCCTTGCCTGCAGTAGCTGTAGGAAAGTGTGAGCTACCTGAGAAGCCCCAGTACATTTCCAGCTGTGCAAATAGGATAGAGAATTTAGCATAAATCTTATTTTCTTCATATGCTGTGCTGGAAAGTAGGGCATCAGTTGATACCAATGATTTTTATATAAACTAGATGACTAATAACG
182	sf001846_AG	GGGGCACTCAGCACAGCTGGTTCCTCTTACAGGTATTACAACCCCTTTGTTATAGCCATCACTATCGTTGACTTTCATTTGTGGAGTTAAATGAATACTCCATGTTCAAATGACCTCGCTTCCATTTTCAGATTAAGGATAAATGATGCTTATCGTTCCACCACCCTGGTCTGTATGCAGTTGGTTGAGGTGGCCCATTCTGGATGGTATTTAACACAATTTCTGTTTAATTCACAAAGGTTAAACATAGTTAAACGTCGGCTTTAATATTTGACTTGAATTAAACGTGATCCATATCTAGTGTGTACATTATGAAAATGTATTTTTCCAGAAGAATTCAAAATGTCAATAGGAAGGGAAAATGTACTTTAAGACCTCC
183	sf001916_AG	GTGTAAGTAGTTCGCTAACGTTACATCACAACACTAATGAGTGTTCACTAATAACCATGGAAACTTTAATCCAGTGAAAGCTATGTGAATGCTGTATGATCAACTATGTACAGTGCACTGAATTCCTTCTTTCATGTACTGTCAGTCTGAAGTGTCGCCTCCTCTCCCCAATTCTTCATACAGAGGTGTTGAAGCTAAGCAGCCCAACTCTGCCATTAGGAAGTGTGTCAGGGTCCAACTGATCAAGAATGGCAAGAAGATCACTGCCTTCGTCCCAAATGATGGTTGCTTGAATTTCATTGAGGTAAGAGTCAAACCCAACATTGCATCCATCTTACCAAAGAACAGTGTACCGGAAAGTATTTGTAGGATGTTGGGGATTGCCTCATATTCGGAATA…
184	sf002018_AC	AAAATAACCCAGGAAGGTTTTATAACTGTAATAACGTCATGATCGACAGCACAGCTTCTCACCTGTCATCTAGCTTGGTGTGTATGTGTGTGTACTTTTCAATCAGCTCCACCTCAATCTTAGTACATACATTGCATGTTAGTTACACAGCCATGATTACAGTATGGTTGAGATCTGTGTGCAGGACTTTTACTAGCAGTTCAAGGTGTAATGCTATGCAGCGTCCATCTGTCAGGTTTCTGAATAGCACCAACTGTGAATACATCTAGTTAACATACTC
185	sf002131_AG	GAAAGTATTGCATGTCAAATGCATTTGGAGGATGTCATCAGTATCACATTGGCCTTTATAGTTGTCTGTAAGATACCCAATACATGACTCCATGTTTAATAGCATGGATTAAAAGGCAAAGATAGCAGTGTCAGATGAGCCATTTTGTAGAAATCTCTCTGTTGAAGATAAACCAAAGATTTAACCACCGACAGGCAATTACATATGCAATTAGGTGTAATAGGTCAAGAATAGTGTATATATCATACAGTGCATTTG
186	sf002145_CG	GGGCACTTAATTGTGTTACATTTCACATGGCCTGTCTATGAGGGAAACGTTACATGGTTTACAGGCATACCTTGAAATCCCACCCACCAAAACCCTTTAAAGCAACTGCCAATATGATGTATAGCCAGTAGCCTAAATCCTATTTGCACACAGTAGCCTACAATCCAATACTCAGGTTTAGACAGTTTGATACAGTAGCGTATAGGGCAGTGTTGGGCTTCTTTGGTACACTTTTATATGGTTTCATATTAGGCTACAGATGTGACAAACTGACCAATGATGTACTCTAATTCTATTGGGACAGTACCTCAGTGCAGGAGGGCTGTTGTGAGAGTACAATAGAGAGATAGTGTAGAGGTATAGAGACAGAGAGTGTAGATGTGTAATGTACCTGAGTGC…
187	sf002439_CT	CACCCTAAAGGCTGTTGAATGAGACAGCAGAGATAACACGCTGAGTCAACCTAAAGATCTGCTTGCCACCATGTATGGCTGTACTGTGGTGTTGTGTTTCTGTGTTATATTACGTTACTTACAGGCCGTGGAAATCCTTTCCCATTTCAAGGAGAATAAAGTGTCACGGCTGTATGCATATATGAAGATCTCTGAGCATCAGGCTTCATCACCATAATGCTGATGTTTCTAACAAGTCCAGTCCAGCGCAGGCCTTAAGTGCAGGTGGAGGCCATCGTTAGCCCCT
188	sf002640_AG	GGCCAGGTCCCAGGAATGGCTTGAGATGATTCCCACAGGTGTGGCTCAGCTGTGCATTCCAATACACACTACCTGTCAACTCTCCCTCCGCTCTGCTTCACTAGACAGCAAACTGATTGTGTAAGGGCTTACCTGTTTGAACATGGATGTTGCAAAATTATTTAATATGTAGGAAAATGTGCATTGACAGTTGGCTAAATAGGATATCATGACTATTCTATCAATGCACAACGGCGCACTTATTTTACATTTATTTTGCTTTCACAAAGCAGGGGCCCAAGCAGTGCTTAAAGGCCTGTTGTCAATGTTATATTACCATGGAATGGTGTGCTCCTCATACAAATGAGTCTTTCCTATAGCATAATTTGTATGA
189	sf003142_AG	GGGGGGGTTGATGAGTACTGGTATGGCCGAGACGCATCAATTATAGGACATCTGGTTATTCATATTGCACTCAAATGACTAATTAGCCTACTGGAAACCAACGGCAACGAACATTTATATTTCTGAGAATATCAAATTATGCAAGGATGTATGGAAGAGATAGTCATTTGATTAAGCACAGGATGTTGCGTGCCGTTCCACAAAAGTGAGAACCTTTATGGAGGCGCGGCCGACTCAGGAAAATACGCAGTCCTAATGCATATGCATTTAAGATAATTGGCTAACATTTTTCTCTGATCAAATCTTCTCTTTTAAATTAAAACACACATTAAATCAGATAGTATGTACATATAAAATTGATTGTTGACAAAAATGAACGAATAAAGGATAAAAACTATG…
190	sf003382_AG	GCACTACTTTTGACCAGAGCTGGGCCCTGCACTATACAGGGATTAGGGTTCCATTTAGAGTGCATCATTTTGTGGGGTCCTCATGCCACAGTGGATAGCTACATTTCCCTCATTGCTTATTTGTACAGTAAGCATTAATTGCTTATGACGTTGTGCTAGAGTTACAGTATTTATGAAGGATAAATATATTCCTATAAAAGGTTTATTAGCTTTGAGTTTTACTTCCTGCTTCTTATTAGTCTAGTCAGGACTGGAATCAACAAGCAGCCTATTTAAAAGTTTTC
191	sf003455_AG	AAACCCAGAGATGAAAGCCAAGATTTTAACATTTAGAGGCTAAAGAAGAGGTCATGTCTCCAAATGACAATTAGTTTAATATGTCTGGGTTTGAACTTAAATTCTGCACACACAGCTAAAGCATATACGAAGTCGCTGACAACTTTTCTTTGTGGTATTGACAAGTCGTTGATATAAATGTTAATGAATTAGCATAAATCATTCGACGTTGCCCTACTGGTTATGGTAATGATGATTCATTAATGTACTCACAATCCATACATTTATATTTTATCAGTCACTCATGTTCAAATGTGCCTCGTACAAGACCATGACAGTGAAAGCATATTTACACGAAAAAC
192	sf003520_AG	ATGTGCACAGGGGAACGCTGAGCTTTGGAGGAGAAGAGAAACACAGGCAGTCTAATTCTAGAAGTCACTCGGAGAGGGCTATCACAGTGTACTGTAAAAGGCTGAAGGATAATGGTCATGCAAGCATCATATCAGTTGTTTATGTATAGGCCTGTGCCCAAATTGGTTCTGAGTGGTTTCAATAGCTCTTTAGAAACAACTTCAAACGTGATGCTTTTGATTCAATTAAAAAATATAAATCACAAGTCACGCCAGTTAAAGTCCATTTTTCTCTCAGGAAATGTCTTTGCTCTTTTGATGCAGGGAGACAGTATTGCCTATAGTGTATTTGAGGAATTATAATTGACATGATATTCATTCTGCCATCTATCCCCCATGTTTAATATGTATAATGTTTGT…
193	sf003611_AC	ATTGCTGCAGGAGAATCTAAATGAGATGTGATATTAATATTGAATAAAGGGAATATTAGCACTTTATTTTTCGATGTACCTTTATCCAGATAACCCACAATGTGTTAATTTATCACACAAAGAAAATGTGTTATCACAGACATGTTGAGCTATGTCTTTCAAAATATATAACACAAGTGTGGAGTTTAGTGTCAGTGAGTCAGTCAGAGAACAGGCATTATATTTCAGACCTTATATTTGAACTGCTTCACCATGTTGTCTGTCCAGTCTTTTGAACCCTCACACCGCTTCCTATCCCTCCCTACACTCTGCCTACATTGTGGCCGCTATGAATAATGTAGGACCGGTGAGAGTAATGCAGCTGGACATTGCACTGCCTGGCCTGATAACGTCAAAGTC…
194	sf003633_AG	AAGCAGTGAAGGTATTGTGAGAGACGCAGGTTGACAGTGAATGTCGTTGCTGTTCGCTTGTTCTTTAATGTTCCATGTGGAGGTGTGTACTATAGAGATTGTACAGTACTTGAAACCTAATCATGCATTTCATAGGAGATTATGTATTTATGTAATCCATGGTGTGGAAAAATATGGCCTCCACTTCAGCTACTAGGTGCACCTTTTAAAGCGTATCCGAGGCTGGGCAGAGAGAATTGTGTAGACTAGAGTGTATTTACTACTAGAGCCTGTATGTATTTATTTGTATGCAATTT
195	sf003639_CT	GCACTTAAAATGGCCATAAAACAAACCTTTAATCCACCATGTAACCTTGCAAGGTTTTCATGGTCTAAGAACATTCTTACTTTTGGATGGGATGGATAGGTGTACTTATTTAACTCAGGAATGAAGGCATTGTGTCAAGATCTACCCATCTCCGCAAAACACGCTCGAAATAACAACGGCCTCCAACGTGACCCTTTCATGTGACAGTGCACAAAGAATCAGGATCGAGAAGGTCAGTGTGCAAAATCCAGACATAAGAGATTGTCGCGAAAGAAGCAAAGTGTTGTAGACGAGACAAAAACATCAACACAGCTAGTTAGTTTCTGACTTTGACTAGCTAGTCATAAAGCTGGAAATAGCTATGCTATGGTCGCTACTCCCTAGCTAAGGAGCTAGCTA…
196	sf003647_CG	GGGGTTCTGTCCATGGAGAAAAATAGCAGAGCTACTGAATGTAAGCATATTTTTCTAAGACTAAGGAAGACTTGGTCTGAAGTGCAATTAAATGGTTAAGGGCTAATTACATTGAAATCCTTCAGTGCTAATCAGAATGAGATAATGCTTGAGTCTCTAAAGCGAAATAAGTCAATTATTTTCTTCAATCATTGTCATGTCATTTTATGTCAAAGTATGCATTAAAATGAATGCAATCACAACCAATTGAGCATTCCAGAGATATTGACTTCAACGCTTGACCTCAAGTAACGTTCAATGCAAGCATGTTGAATGTAGCACATGTAATACATGGAATGGATGGCCAAGATGGATGCAAAAGTACGAGGCATCCA
197	sf003788_GT	GTTACAGGATTATTTTATTGCAGTCCATTTGTGATTTATAAAATGATGTATGCAAATTATACAGGATAACTGATAGCTAAAGATGATAACTGAATACCCATGACTTCTTGATGGAGATATCATTGATATCCAGGGCATACACAGCCTCTCGAGCCCCGAGCAGCAGCAGGCCCAAATCCTCTCGAACCAACATGGTGGAGTAGTTACAAATCCCTTCCTCTCTGAACAGCTTCATATTGTCTAAACAGGAAACCATTAGAAAACTCAATGATTGCTCTGTATCACAAACTGTGTGTGTGTGTGTTCATTCCAACTTTTTAGTATTTGAGGAAACAGATGCACTCCACTACACCGTTATGAGAAAACAGGGGACAAGTGAGAGTGAGGAACTTACCCTGG…
198	sf003899_CT	TGGAAATATTACATCTTAACATAGCACAATGTCCAACAATTCCAATCCAAAACATGGGAATTATAAAATAACACTTTGCTCTTCTATCTGCCACCCATGTTTCCAAAGTCATAGGGTGACATTATTGCTGGAATGTTCCGACATCTACAAAATATTCCCTTTTTTCATTTCATAGTGAAACAAGAGAAGGAGATGAAGGAGGGGAGAGGGAGAAACAACCTTGCTGACTCGGCTGGATGGTTGGATGTTATGTTACATTGGATCACTTGGACTGGGAGAGAGCTAACAAAGGCACCATTT
199	sf003994_GT	GATTCTGTTGCTGCATAGCCATACGTGATACTGTCTGGGTTCCTAACTTTATCAAGCCCCAACAATATAGGTTTAAAAAAAAGAAACAGTAGCCTATAGGCTCTTACAAACTCTTTAAGAGCTACACATTTGTGTTCTTTGTACTTGAGAAACATACATGGGGAATTATCCTCTTAAACCACTCAAATTCACAATGTGGAAGATTGTTAAAAAAATTGACAATTTTACCGATTTTTTTGTTGTTGTTGTAGATGACCATTTTTATAATTGTTTTCTAATAATCTGCCATGATTTGTAAAACGTTTTCTGTGCACTTGGACTATCATAACATTTTAAGAAGTCTTTGTTAGGGATTCTGTCAAGTGTTAGCGCTTGCATTACAATATATATTTATTTCCC…
200	sf004008_AG	AACCATCTTTGGTTACAATCTAGCTGGATAAAACATGGCTCAGTCAATATGACAAATTGGAAAAAGCAACTTCAAAATGAAAGTGCAGTCATTGAATTCCATGAGACTTCTTGGCAAGTTCCCGAATCTACTGTTGGCAAACTAGCAGCTAACTAACTAGCTAAACTGGGAACTGAAGATAACTTGGCTAACAAGCAAGCTACCGAAAACGACTTGACTGACAATGCTTTTCCACGTAGCTAGCTACTAACAGTATACCATCATGCATTTTGAAAAGAGTGAATTAGCATATAACAT
201	sf004013_AC	ATTAAGGCAAAGGGTGGCTACTTTGATGAATCAAATATAAAATATATTTTGTTTATATTTGTTTAACACTTTTTTCTTACTACATGATTCCATATGTGTTATTTCATAGTTTTGATGTCTTCACTATTATTCTACAATGTAGAAAATTGTACAAATAAAGAAATACCCTTGAATGAGTAGGTGTCTCCAAACCTTTGACTGGTACTGTATATGGAATAGGGTGCCATTTGGGAGGCAGTTTAAGTCTCATTCAGATGAGTGGCTATCCAACACTACAAGATGATAGAAGAGAAGAGAGCGGATTTGGGAAGTGAACTGCAGATAACAGTCTCCCAGGGACTAGTTCCAGTCAACAGACAGACCCTCACACTGACACCAACAGGGACATGCACGCACAAC…
202	sf004038_AG	GTTACGTCCTCTGTGGCCGGGTGTAAGATAACAATGTTAATACGTAAAGGGTTAAACCGTTCCGTCCTCACACAGATGTTATGTTTACCTACTAGGATGGTTATCCGCTCTAGTTAATGGGAATGTACAGAAATCCAACACTTGACTACAGATTATATTAGGAAGAATCCATATTTAAGCACGTTAAAATATTTAATAGTGAAATTGTATATGTGTGTGTGTGTGTATGCGCTCACGTACGTGCTTGTGTTTCTTTCCCAGATGATACATGCTAATTAACTTTCTAATAGTCCTACTGTCCCACATAAAGCACTTTTGAATCATACAGTCACTGAACTCTGACCTTTTGACTGGAACAATGGACACCGTGATGCGCTGGAGACTCTTT
203	sf004056_CT	GGGGATCCTATGATAGGTATGGAACATTGGCTGTGGACCTCTGTTGTTCTTGCTGCACTTATCTTTGGTAGGAAATGGCTCTCATTATCTTTTTCTCAACACCCTGATGTTACTGGAATCCTGACATTTTTCACAAAGGTATTCTTCTTTGTTTCCAGAGTGCAGAGGAGCAGACAGTGTTACTCAGTCAACAAGAGCAGTGACTGCTTATGAAGGAGAAGACGTGACTCTCAACTGTGAATATAACACCGGTTTATCAGCTCCATCTCTCTTCTGGTACATTCAATCCACAAACAATTACCCTGAATATGTTTTGCGGAAGGATGTCATTGGACCAGGGGATATTGATGATAGATTCAAGGGGAGATTTGATGCCCATCTCAGTTCCATCACCAAATC…
204	sf004090_CG	AAAACCACAGTTTAGTACAAGGTGATCGAAGAAAAATAAACCAGGCCAGAGATGGCGTATCATTTAACAAAAGCAAGAAGACAATAGAGGTTGACAGGCCTGATGCAGAATGGCAAAACCATAAAACGGCCGACACAGAGAAATGTAAACTCTTTAAGTCTCATGACTTCAGGCTTGTCTGAGGAAGCAGGTTAGGGGAGCTGACGTTGACTCCAGAGTCTGGCCCAGGAATAACTCAGCAGCAGCAGATCAAACACAGTTCAAATTAGTATTCAACAC
205	sf004131_AG	GGGGCCCCGTCCAACACCTCCCCCGCTGCAAGGGGAGACGGGGGGATGGGAGGGTTACTCATAATTGTTATCATATAAATCAAATCATAATTTATTTAATCTCTCGGGGACAGATTCTGCGTGTAAACGCCAACAATCTGTCAAGGCTCACGTAGAATGATGTGATTACGAGCAGCAGTAGTTCCTGGTTTGGGGTTTTCATCATTGATTATTTGATAGAATCAGGATTGGGTGAAAAACG
206	sf004192_AG	GATATAGAAGGTCCCACATGGACATGTTAGTGTGAGAATAGCCTAGATGAAAAATAAGACTGCTGAAATGAACTATTTTAGTATAATGGTATCAAAATCCTAAGATTTTATATCAAATCTCTTTTCTCTGGTCAATAAATTGACTATTCAGCAGACTCCCAGCAGTGCTGTTCCTGCTTGTCCAACACAAGAATCCAATGAGCTCGCCTCTGTCCGATTATTTCTTAATTTCTCCATGAGAAAGTTAATCTAATGAGCATTATTGGACTCTAATGAGAAATGTAATTAGTCAGATGGGAAGATTATCTCCGTGTAATTACAGTAGCTGTCTCTGTCTGCTTCAATTAAAATGACGGGAGTGAGAAGCTTATGACGCCTTGGTGGACGAGAGGGGGGAAC…
207	sf004211_GT	GACAGCCAAGATGTGATGGGAAAATATACAGCGACAGAAACGATGCATAATAATATACTGCAATCCATGTCAAACAAAACTAGAATTAGATTCAATAATTTACTGTACTTACGCTCATCTTGTCTGAAAGTAGAAAACAAAAACCCCCCATTACTTATCAAGCAAAACAATTGGTTTAATCTATATCTATTGTTTATCAATTAGTCCAAAAGACAGACCATAATCCGAACAGGTGCCTTGTCACAACAAATGCTTTGATACGTATTAAACTTAACTTTCCTCAGAATTATTTCATATTTTAAATCCTACAATCTTCACTCTCCATCCAACTCATTTCCACATACAGCACAATGCCACTAGCACCAATTATACAAACAGAGTTGCGTGTTAGCGTATATT…
208	sf004214_AG	TTTCTATAGATGAAGGGTGTGAATTACATTTCAGTGTTTCTCACTTTCCACTGTTCTTCAGTGACATGCAACCAGATCGCAGGCATTGAATGTGTTGTGTTAAATTGCTAAACTACCTGTACCCTTTGTCAATGTGTCAGATCATACAGTAGAATTTGAAAGAGTAAGAACATATATTATCTTTACTTTCACATACTGATAAATCACACCCTATAATTTTACAACGCGTAGCTTGTAATGCATTTCTATAATTCTCGGAACCCTAAGACAATTGCCTGAGACTTCAATTATCTGGCATATGAGC
209	sf004254_CT	GCATCAAAAGACTTTCCATGAGCATAAGAGCTCAAGGTTGCTCAACTGTGACCAAAGTTACTGTATAGGGAAGAGAGATGTACTTATTATATGAGAGTATAAAGTCTGTTTCCAAGTGAGAAACGTTATTTTAAACTTGCAGTAGAAAAGTACAGTCAGGGATTGTACAGAAAGGGATTGTGTACATCAAGAGGCATCTATAGTGTCTGCTTTGTGGGGGTGTAGGGAGAAGTTGCCTTTGACGCTGACATTGGTTCAGTTTTGCATGTTCCC
210	sf004288_AG	GAAGCATAGTGAATTAAACACCGCAAAATGCCTTTTGGGTGAATTGCCTTGCATAGGATGAAATGCATTGGTTCTACATATTGTGAGTGGGTTAGGTTAAATTGCGTGTTTGTTAGGTTAAATGCGAGAAGGTTAGGTTAAATGAGAGTGGGTTTGTTTACTGGCGTAGGGTTAGGGTTAAGATTAGTGTTAGGGTTAAGATTAAGATTAAGATTAGCATTAGGGAAAGTTAAAACCACTTGTAAAAAATGATGGTAACAGAAAAACCCAACCGCAAAGTGATAGCAAAAACAAAATCTCTACGTACACCAGTCATGTGGCCAGTGGTCGCTTTGTTAGCGCACAAGAATCTGTTCTGAGAGGATTTATTGAAATAATAAAAGAGGAAGCAGAGATTCA…
211	sf004319_GT	GGAATAGAAAACATGTATTGATTTGAATCAACAAATGGACCATCTTGTTTTCTATTATGGGACAGGAAGTCACAGGATTTAGTCATTCTCTGATGTTTATTTCCATTTAACCAAACTTCCAACTATCCTTACTTGAAAACCACTTAGGATTTGCAAGCCTACCATATTAGGACAATTAAAGTCCGCCATTCCTGCAGTTTGAGTGGAGTTTTTCTTTTTCTGTTTAATTCTTGGTTTGTTGTCTCTCATTGAATGTAAATATTTATTGTAAAATGTTACACTTCTGAATTAAAGCCATTCG
212	sf004353_AG	GGGGACTGTAAAGGTGGGTGTACTCTATTTATGAACTTCTACTGTAACAGAATTTAAATAACTAGAGAAAATACAAATACTGTAGCGTCTTATCAATTTATGTTCCTTTTTGTATTTATATACATTATTATATCACGTATACTACCTTTTCATCCACAGCATGTTATGCCAAGAACTTTGGTCCAAAGGGCTTTGGGTTCGGCCAGGGGGCAGGAGCTCTGGCACATGCTCAGTAGAGCTCAAGCCTCCTCGGACTCCTAAACATTTGACTGCAAATCCCTGGATTCTCCCGTCAACCCGTTTAATCCTGCTGTCTCATTCCAGCTACTGGCAGAGGCTCAATAGCAACACACAGTGCACAGTTTACCTATGTGCTTACCTGACCAGCGGAGTTGGCTG…
213	sf004357_CT	TTATTTTTTATAGTAGAGGTAATGATTTTAGATAGTACACGCACAGATGAATAGGGGAAACCCATAATAATCTTATCTATTGGTATTGGAAATGGAAGGAAATGTCTAATTCCTCCGCTCCGCTAGGTGGCAGCAATGATAATGTGGATGTCTTGAACAAGAGAAGCAGTAACAACTTCCTTTTATCTGTCTGTGCAGGGTTGCCATGTTTGCAGTTTTGCTGTTTGGGCAACTTTGAAATGATGTCACGGGTGAAAATGTATTGGTTGCAGGTTTTTGGGCTACTTCTAAGTTGCACTGTGGTCGCCATGGCATTTCTCTTAAATAATAAACACTGGCTGTTGACAAACATTCAGTTGATATACATATTATTCATTATTTTATCCAATGATTGAAATG…
214	sf004373_AG	AAAGATTGTCATTGCACAGCAGTGAGTGTTCCATTATGTTACTGCCTGACATCTCAAACAACAACTTTCCTAGAGTGAATATTACAGAGATACACATACTTGCACTCCAAACTCAATTTAACATATCTTTCTAACATTTCAAAATCCTCAGTTAACAATTGAGCCCAGAGAACTCCACAAAGTAACATGAACAGGTTCTACTGTAGATATTGTGTGGCAGACCAGCACTAAACAGTCACATTTGATATCACACGCTTAGATAAGTCCCCTGGCCTCGGTTGAGTCTCTCTGTGGTTAGGTCACCCATAAAAATCAATAGGAAGGAACTTAAAGTCTGTGATGTTTTCTGTATCCCTTGTCACCTCACTACTTGCCCTCTCCCTCCCACTTGGTCTTGTC…
215	sf004379_CT	GCAAACGAAGATGGAATGCTTTGGTGCAGTCTGGAACCGGGGTCAAAGGTCAGTGTTAAACTACAGGACAGCCAAATGACAGAGTCCTGGGCGCTGATACAGGAAGTTGGTATCGTTAAAGCTAAACATATCATCTTTTCAACAGTGTGTAAAAAGCTAATTTACTTTCAAGGTAGACATGACCATTTCTGATATTAAATATTCACTATTGTGAGGTCAACTCAGAGTTCGGGAGCCAGTCTGGTCTCCATGTCAACACCACCTGATCAGAGGTCAGCGGCTCACCTCCAGGTCACCTAGGAAACCGGCCAGATCCAGTCCCC
216	sf004416_AC	ACTGCTGCTCTTTAATTACTTGTTATTTTTATCTCTTATTCTTATCTGTATTTGTTTTTAAACTGCATTGTTGGTTTGGGGTTCGTAAGTAAACATTTCACTGTAAGGTTTTACATCAGTTGTATTCGGCCCATGTGACTAATAACATTTGATTTGAATTGTGGCTTTATAAATCCTCCATATGTATCAGCAGAAATAAGACCGATAGTGCTTCATGGTGCCTGTTTGTTTAACAGCCTACGAGCACCAAGCATCAAACAACGGGAAACATATCAGATAAACAAGATTCTGCTGTT
217	sf004423_AG	AACCTCACATGACAGTGAAAATATCATCTGATTGATTGGTGCTGACTTCATCCTTAGGCAGGTTTCAGCACTACAGGACATGGAAAGTCCCACTGTACATTGTCCATGATGGACATTACCATGTCTTCTTCGCTGGTTACATTTTGCCCCAATTCCCTTGAGTACCATTCTGTTTTTAAACATGAATTGGATGTTTGTCTGAGTGGAGAGATGTATATGCTGTGCTGTTTTTTGTGGGTCTTCTGCTTGAGGTATGTAATCTGAAGACATGCATTCTCGTTGACAGAAGTGAATGGCCTGTGGCAGAAATATGTTCTAAATTTAAAGCGCTTTCAGTAATTGGCTCGTATTGGAGCAGAGGGAAGTGGAACATAGACAATGATATCTGATCCAACCACA…
218	sf004475_CT	TACCATTTTTAAGGTAATAATTGGTTATTATGCACATATAATGCCACCGACGCAATGGCGGCACATGGGGCTCTCCGATGTTGTACCTTTGAGCAGCAGACCAAGGTTAAGTCACAAATGGGACCCTATTCCCTATATAGTGTATTATACATAGGGTGCCATTTGGGACACAAAGCCATACATTTTATTTCACCTTTATTTAACCAAGTAGGCCTGTTGAGAACACGTTCTCATTTACAACTGCGACCTGGCCAAGATAAATACATCCCTCACTTTCCACCTACACACCTAGAACATGTCAATAAATGATATGTCAGAAAGGCAGAGGAATACGCCTGTCTACATAGCTAAGGAACATAATAATGAGGCCCCAGAACAAA
219	sf004521_CG	GTGTCAGGAGAAACGTTACGTTTTTCATGAACATATAGTGATATAAATGATTTTGTATACATTTGATGTCAACAAAACTAATGGCACGAAATCACATGGATCCTGCAACTTTCCCACATGGTGTACACATGAAGGCCTGGAGTCCATTAAGTGACAGTAAATAGCTCAAAATTGCTTGCCTTTCTCCATAAACAAATCACTGAGTTTATATCAGACAGAAACAGCTTGGGAAAACGAAACAGG
220	sf004541_AC	ATGGTGTATCTACTGTATAATAGTTATGGTGTATCTACTGTATAGTAGGGTATGGTGTATCTACTGTATAATAGTTTATGGTGTATCTACTGTAAAGCCAGAATTAGACTGGAGATGAAACTGTTTTCCTCAGTCTTTCCCCTCTTTTCTCATTCCTCAGATAGGCCCTTCTGAATGTCGTCTGGGATTTAGTTAGAGACAATATTCATCTTGACACTCAATTGTGGTGTCATGCGCCTGGTGTTTTCTGGTGTCACGTCAGACTGCATTATCCTGTGAACACTGTGAGCATGCTAAACGTTAAAGGGGC
221	sf004560_GT	AAAATTCCAGCTGAAGAACTGTCATTACTAATATATTCATGTTTTAGATGGGTGAGGGATATTTGTATATTTTGTTCATTACTCTGCTGTTAATACAATCCCCAAATTGAGCATGGCAGCGCAGCAGTCATGTTCTTCAGGAATTCAGCACAGAACAAAATGTGTTATGAAGATGCATTTTGAGATTGTATTAACAGTGAAATAATGAATCAAATACACAAATAGTGTAGTTCTCCTTTAATCTGTAATACATG
222	sf004583_AC	GCGGGGAGAGTCACTCAGGCTTTCATCCACAGACCTTCACCACATTCACTGCATACAATAAGGTTGACTAACTAACAGCAGTGGGCTAATCCAAAGATCACAAACAATTGACATTGAAGTAATGAAAAGGAATACTTCATTTAAAAGTAAGTAACGTTAGCCATAACTTACTGTGCTATAAATACATAAGGCTATGGGTTTCCTTACTCACTTTTTAGGTTGGTAGGGTGTCTGTGGGGCTTGGATGAATCCCATCTCTGACACTCCTTCCCGCTATCTGTGTGATCCATCGGCCCTTTGTAGTCTTCCCGTTACACCTCATACACTCCACTGCAAACGCAAAAACACGTTAGCACAACCTTCCACAATGGCATAGAACAT
223	sf004614_AG	CAGAGATAGAACTGGAAAGTAGCTTGATTTATCTTTCTTAATTGAGGAAGTACATCTATTTCTCAATTGCCTGAAATGCTGCCAATCAGCAGTCCATTTTTCTAGCCTTGGCTCAGGCCTGATTTCCCACATAATTCCCTTCACTCATGTACTTACTGACAACCATAAACATCCTGATATACATTCTATGGCACAAACAACAAAATATTCAACTCTTCCATTGATAGCGCTAGTTCCTCCAGAGCTTTCTTCCTACCTTTCTGGCCAATTCCCATTATAAATGTTGGTCTATAAGCCAGTGCTTTGCTCTCAGATGATTGCTTGGGCTAAAACCTCTGTTGATACTCTGTTGTAATGACATTCTACGATTAATACAAATATAGTTTTGAAACAAATGTA…
224	sf004624_CT	GCTATGGGACAATGATCACTAAGGTCACTTGCAAACCACCAAAATACATGTACTTTATATTTTAGTTCAGTGTATAATCCACATAATAATGCACATTTCCTGTTGTTGCATGATTATTATCGTGCTGTAGCAAACTGGTTCAAATTCTACATCTGTATGATGATATTCATAGCATACCCTTCAAAATAGCCCTTTGAAAATGTCACACTTCCACTGTACCACATACAGGTGTCATCTCAAACATGCAGCAC
225	sf004651_AG	GTGTTAAACGAGAGAGAGAAACAACACGTTATACAAGAAAACAACAGATCATCCTGACATAGCTGTTTGTTACAGTGTTATATACAGTGCACGCACCATCACAGAGACCCTTTAACTCACTGCCTACAGCATGTTATAAAAGATCACAACAGGTCAAGGTTGATATGTTAGATTGTTGAATGTGTTGTATACAGTTCACACACCATCATAGGGACTCATTAACACAATGCCTCACACTTACCAACAGCCTCTAAGAATAACCCTGCAATCAGTAGCAACCCACACTGACAGGCATAAGCAGCCTGTTGTATTAGTAACCCTAACGCATGTCTTGTTATCCATGAAGACGAGAGAGGGGAATAGACCAAGCAGATTGTCTGGGAGAGAGGACGCCATAAA…
226	sf004656_AC	TCTCTCTCAGCCTCTACCTATATCTATCTCTACCTCTCTCTCTACCTCTCACTCTACATCTACCTCTCTCTCAGCCTCTATCTCTCTCTAACTCTCTCTCAGCCTCTACCTCCTTCTCTACCTCTCTCTCTGCCTCTACTTCCCTCTCAGACTCTACCTTTCTCTCTGCCTCTACCTCTCTCTCAGCCTCTACCTATCTCTCAGCCTTTACCTCTCTCTCTACCTCTCTCCTTTGTCTACCTCTGTCCCTGCCTCTGTCTCTAAACACTGCTAACTTTCCACCCAAGGAGATTTCTGCTGCACTGCTGTCCAGTGTTTCTCCAAAAAACCTCAACCGGAATGGTTAGGACAGATGAACCAACATTATGTTTCGAAAGCAGGCTCCCAGAAGTAATCCAG…
227	sf004668_AC	CATCTCCATTTTGGATAGATAACTCTTTGTGTTGTTGTTTGTTTAGTGTTTTCCAATTTTCCCAGAAGTGGTTAGATTCTATCGATTTATAAAATTACATTGAGCTGGTTTCTGACGTCTGCTTGACATGTTTAGATTTGATGGGGAAGTTGAAAGGTCAAATATACTGTAGGCTTTCTATTGCCAAGTTTACTCCTTGGCTATCTCAGTGAAACGTTTTCTCCAGGAAGTGATCTAAACGGTATTACATGTGTTGTTGTCTGATTGTTGTTTGGTAGGTGGCTGTACTACTTTCCTTCCATCTGTAGCATTTCAAAAGAGCGTACAGTTTGTTGGGCTTCGATGCCTCATGATTGAGTATTGCTCTGTTCAGGTGGACTGTGATTTTGCTGTGATCTA…
228	sf004685_AGa	TTGTTGGACAAATGTTGAAATGCTTAAATCCATAACTACTGCCTGACGTCATACTCTAGGCTTTCTGAAAGAAATTATAAATAAATTGACCCAATTGTGATTGCTTCAACCCACATGTTGTCAAGCACAGCAGTGACTCTAGTCCATGTACCTGAAGGCTATCGGTTATCAGTTGTTAGGTGTTTGTGTTAACCTAGCGTATCCACTAACAAAGCCAGTGTGCAGTAGGGCGGACCACTATTTGAAGCTGATGCATCATCGCCTAGTACCCGCTGCTTGCATGGTTCAGTGGATCTGTCTGAGGTGGAGCAAGCAAGCCAAAGTTATTTCAATCCCAGTAACCAGGAAGTAAATTAACCGCGACCGTCAGTCCTACCTGGG
229	sf004685_CG	TTGTTGGACAAATGTTGAAATGCTTAAATCCATAACTACTGCCTGACGTCATACTCTAGGCTTTCTGAAAGAAATTATAAATAAATTGACCCAATTGTGATTGCTTCAACCCACATGTTGTCAAGCACAGCAGTGACTCTAGTCCATGTACCTGAAGGCTATCGGTTATCAGTTGTTAGGTGTTTGTGTTAACCTAGCGTATCCACTAACAAAGCCAGTGTGCAGTAGGGCGGACCACTATTTGAAGCTGATGCATCATCGCCTAGTACCCGCTGCTTGCATGGTTCAGTGGATCTGTCTGAGGTGGAGCAAGCAAGCCAAAGTTATTTCAATCCCAGTAACCAGGAAGTAAATTAACCGCGACCGTCAGTCCTACCTGGG
230	sf004712_CT	CCAGCTAACATTAGCTATATGCAGTTATCTTAGCCAGCCAGCTAACATTAGCTATATGCAGTTATCTTAGCCAGCCAGCTAACAATTAGCTAAATGACATTAACTGCAGGTCAAAAGAGCAGCAACATACAGAATGAGGGAAAATCCCCCACATCCAAAATAGATAGATTCCAGAAGTCAGTCAGCGTGCAATAAGCCAAGGTGGAAAATGTTACAAAACTCCCGTAGTCTAATTCACAGAAAACATGCTGAAAAGTAGTGACTATGGTCAGTGAGCTGGAGCCCAACTACCGGAGACCAGTTAGAACCCAACTAAAACATGATGTGTGTTGAACGTGTTTGCATATCAAAAGATTAGGGACGAAGTGAA
231	sf004714_CT	TACACATGGAATAAACAAATGTACAGTCAATAACACAATAGAAAAATCTATGTACAGTGTGGGCAAATGTAGAAGAGTAGGGAGGTAAGGCAATAAATAGGCCATAATGCTAAATTGTAATTATTTTGCCTTTAACACTGGAGTGATAGACGTGCAGATGATGTGCAAGTAGAGATACTGGGGTGCAACAGAGCAAGAGGATAAGTAACAATATGGGGATGAGGTAGTTGAGTGTGCCATTTACACATTGGCTGTGTACAGGTACAGTATAACATAATTATACTGGTGCATAGAGTTGTACGGTTTGTTTAACTTTGCAATCATTCGTTTTTGTTTGGCATACATTTTAAAGTAAAAAATCTGAGTCTGCATCTGTTACAATGGAATTGCCCTAAAGCA…
232	sf004741_CG	GACACAGCTCAACAACTCAGACCTATATATATGATCCTAACAAGTGGATAAAGCCTCATCCCACAACGGAATACATATTTTGGCACAACAACGTCTGTTGTGAGACTCTGCCTCACAGTAGCTCTTAGATGTCTCAGTCAATTTGCAGAGCAGGGAGGATAAAGCCCAGTGCTACAGACGGATACACAGGAATATGGCCTTGTTGTTCTAGATGAAGGCGCTACTGAGCGGCCCTGTCTACCTGATGCCACTTCCACTACCTCCTCGCTCCATTTCCTGTCATCTTATCTTCCCC
233	sf004774_AG	GTTGTATGGAGCGATAACACTCTGTGTCCTTGGCAATGGTATGGCACATCTATGGGTGGCAGCGGTACGTAGCACAAGCATCTAGAGAGGTAGACAGAGTATTAGTGAAAGACGAGCTCTTACTTAATAAAATAACCTGATCAAATATTTTCCAACAGGCTGTGGGCGCTGCCTTTGATCAGGCTGCAGGTTTGGAAGCTAACATGGAACCAGCGCTCACCGCAACGCCACTTTATTACCACTGCTAAATGCATTGGCCTTTTCCTTTTTTTAA
234	sf004795_CT	ACCATTTTTTGTTGTTTCGAAGCATATAGTCACAGCTTTGACTCAATACATTCTGGAACACTTAGTCTATGGCTCAATAATTTATGTATATTAGCACCTGTTAAACCAGGGGCTTTAATATACGCCGTCAAGATGGAGAAACAAAGACAAAGATACAGCTGTGCTCAATATGGCAACTGATCATGCAAATGCCATTCAGAGCCCCAGCAGTTATGTCATGCAGGCTATTGAAAGCCACAACAATCACCAGACATAAGGCATAACTGTTAAGAACACGAGTCTAAGCTTCTTGAAAGATCCCCCC
235	sf004811_AT	TAACTGTTAATGGTAGGATATAGTTGTAAATGTCTAATAACGTTTATTTACATTTCCATTGAAATCTTCAACATGAAGAAAATCAAGGTCTCTAAATTCAGGATAACGATTATGCTATAACGGGTATGCTGTTATAAGTAACCAAAATAGGTCAAACATAAGATTAGACACAGTTGTTTTGAAGAGAAAACAAATGTCGTTTGGTATGGAGACATACAGCTTTATGA
236	sf004839_CT	ATCTACGTCTGCTGCATTTGGTACCCATGAAACAAAGGAACAAAGAACAGCTGAGTCGAAATCGAAATCGAGGTTAGTAACTGTTGATCCGATGTCCAAAAGTGCTTGGCAGGTCATATTTGATAACAGTATGAATTCTTGGTACAAAAAAAGTAAAGAGAAACATGAAAAAAAGTCACTAAATAGCAAAGTGGGTTTGGAGAAAAAGCACGATGCAGCAGCCTTACAGAACACAACAACCGAGATGCTTCCTAAAGTAGAGTGATGGATGACTGAATTGATTCCTTTCC
237	sf004890_AC	CTCCATTTTGGATAGATAATTATTTGTGTTGTTGTTTGTTTAGTGCTTTCCAATTTTCCCAGAAGTGGTTAGAGTCTATGGATTCTTCAATTACATTGAGCTGTTTTCTGATGTGCTGTTCCTTCTTTTTCCGTAGTGTATTCCTGTATTGTTTAAGTGATTCACCATAATGAAGACGTGGGCTCAGGATTTCTGTCTCTATGTTTTTGGTTCGATAGGTTTCCCAATTTATTTCTTAGGTTTTTGAATTATTCGTCAAACCATTTGTCCATGCTTTTAATCTTCTTTGGTTGCTTGCTTGACATTTTTAGATTTTATGGGGAAGCTGAGAGGTCAAATATACTGTTTAAGTTTCTATGCCAAATTGAAACCTTCACAATTACAGTGAAACATTTTGTC…
238	sf004897_AT	ATCTTAGTCCCTTCATGCCAACAAATACTTTGAGAAGGCAGATGACATATAAATGGCATTTTCGTTTGTTTTTCCTTAAAAGCACATCAGTTTTCTGAAGCGCTATATCATGGATTCAGGTACAGAAAGATGTGATAATTGAGAAGAATGCAAAATGACACAGCGCTCATTTCACTTTATGAAGCTGCTTATAGAACTAAATGCTACCCAGTAAAAGTTCAATGGGTAACATTTAAAACTGTTTTCAACAGATTTACTAGTGTATTAAAATCATTTCTGCGTGTCTTGTGAAACACTATGGTAACAATCTTTGATTTGCCATCTAGAACTGGGAACTAACAGCAGTTTCACCCTGTCCCTGCCAAACAATATAAACATCTCTGAATTGTATAACTCTAA…
239	sf004917_CT	GCTAGCAATAAGATATGTTGGGGAAATAAATCAGATTTGACTGTTCAGGCAAGTCCCCTACAAATGTGGCTTGAAATATCTGCTTCTGTGTGCTTTTTTGTCTGTTCAGACGGCAGGAAACAGATTGGATCACTTCAAACTGCCAAGTGGGAACAAGGCTTGAGGTCTAACTTTCCTTACATACTGTTTGTACACAATTGTGCCTTATGGTCTTAATAGCCATTTTCATTCTAAACTCTCTTCTGTGTTTTATGGAGCATTGAAACTATATCAAATGAT
240	sf004938_CT	TTGACACAACGAAATGTAACAATTTAAATTCCAATTATGCTTTGCTTTTGATGTGACACGATTAACGTGAAGCCAAATCCAAACTGGTTTGACACTTTTTTTGGTGCGCCAGGACCATTCACAGTTGAGGTTACTCAGTTTAGCTCAACGCTGACTGACTAGTTGTCCAGCCAATTAACCAAATATACAGACAGAGATTCAATGAAACAAATCGCATTGATTGTTTATCAGACAAGTCACAGGCTTTGGTCGGGAGTAGGACAGGCTGAAGAGCAAATCCAGCTGTATAACATGGAAGCAAAATGTTCTGATCAGCTAATATACGAGCATAACTAGAAAAAAGATGATCATTAGCACTCACCTCAATTTAGCTAATATTTCCCCAGCCTAATTGTTACC…
241	sf004984_AG	TTAACATTTAATTTTTTGGGGATGTGCAGACATTATTCTTTGGTTTCCACACATAAATATATTGCTACAGTGTGTTACAAATGGAAAGCATGTGACATAACTATGGGTGCATTATTGTTCAACAGGTTTAATGAAAAAAATGGAAAAAAAATCATAAGAGAATCAGAACTTATTTGCGTACGCCCGAATAGCTTTTCCGTTCCAGCCCAAACATGCAAACATGCTACATCTATCATATCAAAACAAAACACAGTATATATTTATCATGAAAATCC
242	sf005052_AG	TAGAACCGATCTGGGACTCGAGCGGGTCCGGATCCAGAATTCTAAATAATGTCACAGATCTGATCTGATTGTCACGGGTCTCGGGTATGTGTAATTTTAACTGACTTGTCCGGAAGGGACCGTACAGATCAGAACGAGACTGCTGCAGTGAATAAAGAAAGAGATATTTTATAATTTATGCTGGTCCTCTTGCTTTTCACGAGAGGAGCGTGGAGCGTGGCGCGTGTAGCTTGTTGTTGACCAATCGTGAGTCATCAAAGCGGCAAT
243	sf005168_AC	AGCCTCCCCACCCTCTGTTCAGCTAGATATCTGCCCAACTGGTGCTGCTTCAACAGGTGGCTGGAGTCAAACACAATCCTCCACTCTGTAGCATTAGTGGCCCAGTGGAAATGAATAGAGGCAACATAACTTCAATAATCCACCACATGCCTGAGTATGATCCCCAGCCTCCGGCCAACACGGGAGAAGTAACACTCACTACGCCTTGGAAACGGAGGCTACATGCAAATTAAGTAGAAGAGTCTATTTAAGGACATTTCTAATAAATATGATTTTTTAAGATATATGTTTGATTTGTGTATGTGTATTCTAGATAAGGTAACCCAGATAGTTTTTGTGCTATATTTGGAATTAAATGACTGATCTATACCGCCTCTCAAATCTCATGTCATTCTGTGC…
244	sf005186_CT	GGGGGGAGAGGCTGGCGACAGCAGTGGCATCGCCCCACAGGCAGGGTGGCACTCAGTGAAATTAACAAGCAGCTGCACCTACCGCCACATCACATTCCAGACGGCTTCAGTCACTGACCCACTTTAGCCTTCCCAGCCAGCGCAACTCTCCCTCCCTCCCCTCCTTTCTTCCAACCTCCATCTGCTCTCTCCTCTCTCCCTCCCTTCTACTGCTCTCTCCCTCCTCTCCTCCCTTCACGTGTTTCTAGGAGTGTTACTAACAAAGCCCTGGTCAACTAATCATAGACCAGATTGATCTGATGATCAACTATCTGTATTTTTAGAAT
245	sf005258_AC	CAATCATCTCTTTAAAATCCAGTTTCAACTGTTTAGAGCTGGCCTTCAAAATGTAATTAAAACCCATATGGACTAAGATATAATTGATTTCCATGTCTTGACATAGTACATTTGGTGCAGATTAGTAATGTAATTTACTCAAGCTCCGGGATAGGACATTGATTTTGCACCAGGAACAGTCACATTTCTTACCACGGAGCTGCCCAAAATCACGGCTGGCTAGAAGGACGAGGAAATCCGCCCATCCCACCCGGCGCAGGCCTCCGACAGATGGAGAAGCCCACTCGATCCAGAGCAGGGACAGAAGGTTGCCGAAATCGACTTCGAAATTTTAGTAGTAGGCATTGTGGCCCCAGATACAGGCATCTCCAGCGAGGAAGGTGCAGGAAGATCAGGTTT…
246	sf005286_CT	ATAAAATGCAAACAATGAACACGTTTCTCCCATGCTACCTATTCAATCAAAAGGAAATATATCTTTATGAAATCAGTTATAAATCATGCCACTACTCACCACTCCAAACAACATCACCAATGATAAGGTACCCGCCATGCTTCGGTTTCCTACAGTGTCATAAACAAATAGACTATACTAAATGGATACTGCAAAGGAACATACAGGACGAATTGTTCATTTTAATTCCAGTGGCAATTCTTTATCAATGAGTCCGCAGTGAATTCCCCATGCTCTTCGCTGCCGTGTAGCGTTCGAGACCTTTTGAGAGTGAGATGCGTCGCATTGGCAGGCCACTGGTGCGTGCGTGCAGCGTTCCGGCGCAGGCTGACTGTACTGAGCGCTATCCAGCAGTGCACT…
247	sf005311_CG	GGGCAGTCCCGTTAGTTCTCTTATATACTGCTTACACAGACAAGTTATATTTACATGATTTAGTTTATTCATCATTCATAATTAATTAATCATTAACGTTTGGCACATGCATGTGAATGACCAATACCTCATGAGGCTTCTTCTCTCCAAGCTGAGACATTGAAACTGAGATATCCCTTTTGTTCTCCAAACAAGGTTCTGGGCGTACTGACAAATTGCAGATACTGATAGTGAGGGTTCCTCCCTAAGGAGATGGAGAAAATTCTGACGTTTGATTGCAAATATGCGGAGGGAGAACACACAGAAGGCTGTTGTATAAAAACACTGGATTACATCTTCAAACTAAGGGCAACCATGGCATCCGCGATAGAGGGAGAAGCGTTCATCCATGTATACGGT…
248	sf005344_AT	GGGGCCCTGGGGTTCTCCGTTTTGCTCTACGACCCCCACAAGCGTCACATGTCTTCTCTGAAGGTAACCAGTACCAGTTTTGTTTTATTATGGAAGTATGAAGGTAGTTTTGTGCCTACCCAAAAAGGGGTTAATTACAAAAAATATTTCCTGATTTATTTAATATTTCCTTGTTTCTTATGATTTATTATTTGATTGTATTTTTTTGCCATTTATTAATGTGTTATTCAATGCATCTCTCTAGGCTATAAAAGTAAAGGCCAAATTCAATATTTATCAAATTGTATACCTTTTTTATACCTAAAGTGGTCCCAAAATTCTAAATCAAATAGCTAAATGATCCATAGTATGACCATCTTAAAACAATTCCAT
249	sf005440_CT	GAAAAAGAAAGATACAAGGAAAAAGATTGGTGTAAAAAAAAAGAATGAAAGAGTGAATATCAGTGATGTGATATTGTGTCTGTTCATGTTGTGGAAAGTTATTTGTTTTCTTTATTCATGAACATGATTCGACTTACGCACGCAATATGTAGCTGAGAAGTTACAGCTTGATAAGTTGATTTATTCACTGTACCTTAGTCATTGTAAGATCAACGTGCAGTTCATTGTAATTTAGCTTTGAGGGAAAGTCTAGAGCTGCACAAGCACGGCAACAATTAATAAAGAGAGACTAAGAAAAAGTGAGTGCTTGACTTATGGTTGTAGGTTTGAGAGTGAGGGAGGGATGTCAATTGTGTGGGATTGAAACGGCTGCAAAAGAAGAGCTTCAGAGGAATCGGG…
250	sf005440_AG	GAAAAAGAAAGATACAAGGAAAAAGATTGGTGTAAAAAAAAAGAATGAAAGAGTGAATATCAGTGATGTGATATTGTGTCTGTTCATGTTGTGGAAAGTTATTTGTTTTCTTTATTCATGAACATGATTCGACTTACGCACGCAATATGTAGCTGAGAAGTTACAGCTTGATAAGTTGATTTATTCACTGTACCTTAGTCATTGTAAGATCAACGTGCAGTTCATTGTAATTTAGCTTTGAGGGAAAGTCTAGAGCTGCACAAGCACGGCAACAATTAATAAAGAGAGACTAAGAAAAAGTGAGTGCTTGACTTATGGTTGTAGGTTTGAGAGTGAGGGAGGGATGTCAATTGTGTGGGATTGAAACGGCTGCAAAAGAAGAGCTTCAGAGGAATCGGG…
251	sf005443_CG	TAAGTCAATATTTTTCTTCAATCATTGTCATGTCATTTTATGTCAAAGTATGCATTAAAATAAATGCAATCACAACCAATTGAGCATTCCAGAGATATTGACTTCAACGCTTGACCTCAAGTAACGTTCAATGCAAGCATGTTGAATGTAGCACATGTAATACATGGAATGGATGGCCAAGATGGATGCAAAAAGTACGAGGCATCCATTGGTCTCTGCAGTACATAGGGCCTTGGTGATTGGTCTGACTGTGTTGCAAATAGTATTC
252	sf005459_AC	AAACTGGTCAGAAAAATGCAAGTACCAGATTGACTTTTGTGATTGAGTCAAGAAGTAAATCATATATTTTTTTTTTCTCAACTAGCCAGCACGTTTCTTATTCAAAAGAAATGTAAACACATTTTGTCAAAAGCATAATGGAGTCCCCTGCAACTGAAAGACATTTTTTAAACATGTGTCTGTTAATTAACTGCATGAGGTAAATCAGAC
253	sf005501_AG	CCCACAGACACATCCTGCCATTTGCAAAGTAAGCAAACCAAAAGGTCCGCCACAGAGTAAGGAACATAAAAAGTGTCCTTGAAATAAATCAGCTTTGGTACTTGGAAAAATAAAACAAACTTATAACATTCTTCACTGACAAAATGATACATTCTACCACTAAATTGTTCAATGCATTTTCAAACACTGGATGCAACTGATGCATAGCATACATAGTTCAGATAGAACACCTTGCATTGCTTTCAGATAAGAGGTATGTTCTATTTTTGCAAGGTTGTGTGCAACTCTGCGT
254	sf005540_CT	CAGAGCATTTATCCCACAACCAATGCAGTGTGATCATTGTAAAGCTTCAGGTCATGTTGCAAGTGTTTGCAGAAGGGAGAAATTGAGATGTCCAAGTTGTGGAAAAGATCATATCATGTGTTATAAAAGTGATGAAAATGTAACATGTTGCAATTGTGGTGGGAACCATGAAACCACGTCTTTGAATGCCCACAAGGGTGGAAGAAATGCTGTAGCCAAAGTTAAGTTTGTCCAGAGCGTTTCATATGCAGCAGCTGTTAAAGGGTTGAGGGTTTGAATGGTGCTCCTGATATGTCCATGGTGGTGGATAGGCAGTGGTTGATTTAGGTAGAGGCAACATGGGCAGCCCTGGGTACGGCACGGGGCGCCCGCACAAAAAAAAA
255	sf005590_CT	TGAAATTTAGGAAGTGGAGTGATGTGAAATCTGTGCAGTGTGTGACTGAAAGCATACAGAACTTTCACAAACTTCATGAAAACTCATATATACCACTATCACTGTCTCACCGTCACATGTCACATTATAACACCAAACAAATGACTTTAGGTGAAATCTGTGCTGTCCTAATTTATACATACACACAGAGCACACTATGGTA
256	sf005652_AG	GAGCGAGCATGAATATGAGAGAGAAACAACAGTGAAATGGTGTCATTCTGAACTGTGTTTCTAATTGAATGAGTGAAGCCAGCGACAGCCTAAAATGCATTTGCCTCTTCCATTTAGTCGTCTATTATACAAAACTGTACTTTAGATGGTTATTTGGTCTTAATTAACAAGTAAAACTGTTTTTTTAAGTGTTTATCGCTCTTCTTATTGTCCTACTTGTCTTTAGTCTACCAAATAGAAATGTATGAATTATTGAGTCGTGCCAGCACACAGTCACAGGACTGATAGAAATGGATGAATTATTGAGTCGTGCCACCACACAGTCACAGGACTGATAGAAATGGATGAATTATTGAGTCGTAC
257	sf005654_CT	GTGGAGTTTCGATTTCCATTGCTCTCATTGTCATGTCAGTGACTTCAGCAGTGCGGCACATTTCGATGGCAGTTACTAATGTTAAGCCTCTCTCTCTCAGTAGACGCCGGCGCGTATCCTCATTTCCAATTCCCAGTACTATTTTGTCACAAATCAATTCATCTTTCAATCCCCGTATTCACAAGTGGCGTATTTTCTCTCAAACGGGTTACAAAGTTGTGTACTGACTCACCCTCTTCCTGTTTGCAACTTCCGAAAACGCTCGTAAATGACGTTTCTGGCGGGTTTGAAGTAATTCTCCAATGCATCCAATATAGCCTTTGCATCACACTGTTGTTGTGCCGTGAGGGTGAGATTGTGCCGGTAGATATGCCTGCATTCGCTGCCCATTAAACTCCT…
258	sf005663_CT	GTGGAGTTTCGATTTCCATTGCTCTCATTGTCATGTCAGTGACTTCAGCAGTGCGGCACATTTCGATGGCAGTTACTAATGTTAAGCCTCTCTCTCTCAGTAGACGCCGGCGCGTATCCTCATTTCCAATTCCCAGTACTATTTTGTCACAAATCAATTCATCTTTCAATCCCCGTATTCACAAGTGGCGTATTTTCTCTCAAACGGGTTACAAAGTTGTGTACTGACTCACCCTCTTCCTGTTTGCAACTTCCGAAAACGCTCGTAAATGACGTTTCTGGCGGGTTTGAAGTAATTCTCCAATGCATCCAATATAGCCTTTGCATCACACTGTTGTTGTGCCGTGAGGGTGAGATTGTGCCGGTAGATATGCCTGCATTCGCTGCCCATTAAACTCCT…
259	sf005769_CTa	GACAGTCGTTTTGTGTGTTAAATCTGCGCCTTTTGTTAGTGAAGGTCCTGGTTGAATGTGGCTGCTGGGGGGAGAGTTTCTGGTTCCTCAGGAGCACTAGTCTCCGACAGTGTATCCTATCCTACTACAGTCATATTTTTAAGAAGGGCACTGCTTTCTCCAATATACCCTCCTCACACCTCCCTCAGATGGCCTCTCCTGTCTGTATTCAGCCCAGGTGGCTCTCCAGGAACAGATACTGTAAAAGACACTGTGTGCAAGAAGGTGAATAACATTAGATCATTTCGGTTGTGTTTACTTTCTTGTCATGTTTTTGTTCTGTTAATAAACGTGACACAGAA
260	sf005769_CTb	GGGGCCTATGTGTATCTGGACCACACTGCCAAATATATCCTAATTTCCTCCTGAGAGCACTGACTTAAGTGTAAAGGTGTTTTCTATTCTCAGTGTTTCTTCAAGGATTCTTTTCAGCGGCGGTGGCAAAGTTAGGAGGGGCGGTGCAGAAATCTTTTGTTGGTCTGAAGCTACTTTGCTGCAACTCTACACATTTTGCAATGGGGCAGAGAGAATATTTCACCGTTTTAAAGTTAGTTTCCTGCAAGTCTACACATTTTGTCACGGGACTGACAGACGTGCCAACCTGCACGCATTTGCATATCAAGCCCACAATTTGAGGTCAAAGTAGCTGGTATGAAAAACTACCCTAAAATAAGCAAAACGTCTTCTAGTTGGGCTTCCATAGCCGTAGCACCC…
261	sf006000_CT	GCCGCAGACACAGGTACCCCCAGCGACGAAGGTTTAGGAAGATCAGGCTCAAGGGCGGCAAAACTATTAGTTGTTTGTATCCACTCCGGGCCTCTTGTTGGAAGTGTAGCCTGCTTTGCGGGAGGCCGCTGTCTTTGGCTTCCACGGCTCGTGACATGCGACCATCGTTGATTGCCATGCTCCTCTTGCTGTGCTCCTTCGACTCCACTATCAGATGGGGGAGAATAGGCAGGAGATGGTTCCCCTGGCAAACGAACTCCGGGCAACACCGGCCAGTCGGAAAGTGACAAGCGACAAGACGGAGATTCATCCAACATGCGCGAATGCCGTCCAGCCACCGGCATAGAAACAGTAAACCTTCC
262	sf006000_AG	GCCGCAGACACAGGTACCCCCAGCGACGAAGGTTTAGGAAGATCAGGCTCAAGGGCGGCAAAACTATTAGTTGTTTGTATCCACTCCGGGCCTCTTGTTGGAAGTGTAGCCTGCTTTGCGGGAGGCCGCTGTCTTTGGCTTCCACGGCTCGTGACATGCGACCATCGTTGATTGCCATGCTCCTCTTGCTGTGCTCCTTCGACTCCACTATCAGATGGGGGAGAATAGGCAGGAGATGGTTCCCCTGGCAAACGAACTCCGGGCAACACCGGCCAGTCGGAAAGTGACAAGCGACAAGACGGAGATTCATCCAACATGCGCGAATGCCGTCCAGCCACCGGCATAGAAACAGTAAACCTTCC
263	sf006410_AG	GGGGGAGCATTCTGTTCCACAAGGCTACCAAAAAGAAGACACTGGCTGTCATTGGCGACCCCTCCCACCCTCTCACCCTCCGTTGGAGAGGCTTCCCTCTGGCCGGCGCTTCAGAATGCCCATGGCCAAGAAGAACGGGTTCAAACATTCATTAGTTCTTTGTGCTGTTGGACTACTAAATGCAAAGTAAATTGTATCGGTATATGTACTTATCTATCTGGTGCAGTTGGGACAGTGGTCATTTGTTAATGAATGTATTAATGTCCTCTATGTTGTTAGTGGATGCGACATGATGGACTGACTGGTTTAAATGTGTATGCTGTGAAAATGTATGTGATTCTTTTAATGAAGGTGATGCCAAAGAAAAATGTCCATCCTGGATGGACAATAAAGTTTTAT…
264	sf000310_AC	GGGAAGAGTACAAACAGAGCTGGGACCAGCTGGAGAGAATCTGGATGGAGTCTGCAGGGGCACTTTATTTCTCTAGAAATGATTTGTATTTAGAATAAATACCTGTATAAAATAACTCAAAGCCAAACATATACTGATACTTAACATGTTTAGCCACAGTTGTTTAAATATTCCCTTATGGAAAAAAACACATGAATTTCACATGTGAACACGTGATCTCAGGTGATCATGTGATTTAATGTGAAGTTAACGACACTACACGTTACAACATTTGAGCACATGTGAAAGCCCAGGTGTCAAATGTTATTTAAAATATTTTACATTAAAAGGCATAATTTACATTATTACATTTAAACAGTCATGGTCCCATGCAGGTTTTATATAGTTCCCGGTTTGTTC…
265	sf002055_AG	GAATCAATGAATCAACCAACCCCTATCAATCAATTTACTGAGCATTCTGTGTGGATATTATTAGTATCATTCTATGACTGATGCATTGTCACCTGTCCTTAGTTCTCCATTCTAACACTGTCTGATTCAGTGGGAATTTATGACACTGCTCCACAAGCCTTAGATTACATTTGTTCTTCAAACAGGATCAAAGTGAACAGAGCGACAGCAAACTGGGGTTTATCGCTTCGCCATTGATCTATTCATGGTGTATCTGCTGAATTATTAATATCACTCGTGCTTACAGTCTGATCCCAGATCAGCACCAATTAGTGCACAGGTAAAAAGTGTTACCTAATTCCCTCCAAAAATGTCAGTT
266	sf002721_GT	CACCCAAATGAGAAATAAACAGGGGGTCACCCAAATGGGGATTAAACAGGGGGTCACCCAAATGGGGATTTGGGGGGTTGTAAATATTGATGTATGTGGTGATGAGCCCTAAAATGCAGGGTTTAAGTTCTGCTAGCTTGATGTTTAGGCTGCTGTTACAGTTTTCTCCATCAACGGAGGAACTGACTGACTCCATATTTCTGCCACTTGAAACGTTGTCCAGTTTAGTATGAAAGGGGAATACTATACAGTAATATGGAAACCCCCTGGCATATTAACGTTAGTATTAGTGATGATGGGACTGCCAGGGATGATGGTAATTCCATGTGGTAGGTTTCACCCACTAAGTGGACATGGGATAAAGCTCTTGGGGAGTGTAGTTTTCCATCCTGTACTGAC…
267	sf003016_AG	GAGACGCTGATTAGCAACGCTACATTACCTCTCTGTGTCCAAGGGCAACTGTTTCACATCAACACACTCTTTGGAACAGAGCAGCTAGCTAACCTTACCTCAGAGTTCGCAAAGCAAATATCCTGAAGTTCCTTGTGTGATGGAAATGTTGAATTTAGAATATAAAAGTTGCTTGTTGCAATATTACCATAAACATCTGAGTGAGAAAAGTGATTGACAAGTGTTTTATTAACGGGTTGTATTTTCCTCTATTTACAGAGGGAAGATTAATGTTGAGACAAAGATCTGTAGTTATGTTCCGTTCCTCTGTCTGTGCAGTTCACACATTACCACATACAGTGCTATAATTAGAGAGAGATTTGCATTTGAATGTGTTTGTGGGACTTTGGTCGCTGGA
268	sf003755_CT	GTTGCAGGAGTACTTTAAATTGTGTAGTGTATTTAGGTTTAGGCTTATGAAGTTTGTCATTTACAATTTAAAATTTCGGACTTGATTTTCCCTTACGAAAAATGTTTCAACCTCTACAAAGACGTTATTTAATTATAATCCACTTAATTCACATGTTCTGTTGCTGCAGGATGATTTTCCCGCTGTAGCAAACTGGCTCAAATTAAGATTCTACATATGTAAACGGATTCAAGTGATTTAGCAAGTCATTACTATTTCCAATGTTTGAGAAACGGATGGTGAGTACTAGGAGTGACAAGTTCACTTCACAGCGGAGACTGAACAGGGTCTGCCATTTACAGGATATGGTTGCAGATTTCTAAGGTTATTAATC
269	sf003922_GT	GAGTACTACAGTCAATGTGTTGATAAAACTTCTGTAACGTTTTCCTCATTTGCTTTGTTAAAATCCTAAACTACAATAAATGTTGCCTCAGGATATGTGGTTTCCAGTTTGCATGAGCGCTGTTGTGGTATCGGCTTGAGGGGGAATATACACGGCTGTGACTATAACCGAAGATAATGAACTTTTGAGGTAATGCGGTCGGCATTTGATTGTGAGGTATTCTATGTCAGGCGATTAAAAGGACGTTAGTTCCTGTATGTTATCACAATCACACCACGAGTAGTTAATCATGAAACATACACCCCGCCCTTATTCCCGGAATGTTACAATCCCTGATGTCTCTCGAAGGAAATCCTCGCCCTGAGCTCGTGTACTTTGTGACTGAACATTAGTGAGTAA…
270	sf003974_GT	GAGTAAACAAACATACAGTAGAAAAATAAGTCTATATACAATGTGAGCAAGTGAGGTGAGATAATGGAGGTAAAGGCAAAAAAAAGGCCATGGTGGCGAAGTAAATACAATATAGCAAGTAAAACACTGGAATGGTAGATTTGCAGTGGAAGAACCCTGTTGATTATGAGCAGCATGCTGAGTTGCTGTCACTCATTCAGAATTAGCGTTTCATCTTTGTTCCCTACCCTTGCCCCACTTGTGAGATATTATGGACCACGGAGTGAGGTGAGGGCACTTGGAGTGTGGTGTCAGGAAAACAACATCTCACTCAACGTCAACAAAACAAAAGGAGAGGATCATGGACTTCAGGAAAGAGCAGAGTGACTACCCCCCCTATCCACATCGACGGGACAGCAG…
271	sf004045_CT	AAACAACCCAGCTCCTCTAGTGGCGGATGACATTTTCCACCTGGTTTGCCAACTCAGTCAAATGAGCTTCTTATCACCCCTGTCTGCTTTTCACACAGCAGCTTTTGCCCGCAGAGGAAAAACACCAACAGAAAAACACTACCTCCTCTTCTCTCTGCCTGCCACAGCATCACACAGAGACACACAGACACGGCAGCATAGCCTGCAAAACAGAGCAGTAGCCCTGGCTGAAACAAGTTACGCATACCTAGTCAGTATGTTACTGGTTACGCATACCTAGTTAGTATGTTACTGGTTACGCATACCTAGTCAGTATGTTACTGGTTACACATACCTAGTCAGTATGTTACTGGTTAC
272	sf004434_AT	TTGTCTAGCCTTGGGTCTGATATAAACCGGATTTGTGATAGCCATGGTTACTGGGTCGTTCAGTTACATGGAGACAAAGTTGGCATTGACTTGTATTGTAGCTCATCACCGCAGAGTTGTGCAAGTCTAGAAACAGACAACCAGCAAACCCAAGTATAATGTATTTGGTTGACAAAGACTGAGAATTTATTCATATTTTATTAAAATATAGTTTATAGTAGTTCACATCTACAGTATATGGGGTTAATATTTGTTGACTAGATCACATTGATCATTGTTCATAATGGACTACTCAAAATCCTGACCTGTGATTGGCTCCTCACTTTCACTATAAATAGTGACCTTGTACTTGAACCACATTAGTACAGGAAATGATTAGTGTTAAGGTACGGTATGTGC…
273	sf004471_AG	GATTGCCCCCTTCTGTTGGGAACACGGTCATTCTGACCATTGTGGACAGATTCAGCAAGTTTGCTCATTTTGTTCCTCTCTCCAAGCTTCCATCGGCTACGGAGACGTCCGAGATCCTGGTCAGGGAGGTTTTCAGGGTTCACGGATTGCCCAGTGACATTGTGTCTGACCGTGGTCCTCAGTTTACCTCTGCTGTCTGGAAATCCTTCTGTTTGGCCATTGGAGCTACAGTCAGTCTCACTTCTGGATTTCACCCACAATCTAATGGTCAAGCGGAGAGAGCCAACCAGAAGATGGAGTCC
274	sf004715_AC	AGAACACATTGGAAATTCAACTCACCTTTGGCTGTCTTTTCTCGTGTTCGTCTTATTTCTATTTCTCGTGTGTTTTTATTCTACTTTACTTGTTAATAATTTATTTTTTATAGTATTGTTGCGTTGTTGGGAAAGAGCAAGAAAGGCATTTCACTGTACTAGTGCACGTGACAATACAAACTTTTATGGCATTACGGTAAATCTATATTTTTCCATTGGAATTCTAGTTTGTAAACCAAAACTGTATATGCATGGCCCATATGTTTTATGACTTAAGGTTGGGTGTGGGACATTACCAAACCCCATTCACAAAAATTGCAGACAGCAGACAGGATAGACCCAAGGAAGGATGAGGTATCCTACCAAGTGTTTATAATTAAATTAGCACATGGAGAAGCCC
275	sf005157_CT	ATTCTAAAAACTTTTAATATAAATGTCCAAAGAACATTAATGAATCTCATATCAGTCTTTTAAAATGGGCCTTTGCATTTAGTTTTGCAAAGATTCTCATTAGTTCCACAAGTTCAGGGTCAATCAGAGCAGTTATTAGAGAAACTCATGAAACACGTGTTTATTTCAGCTACATTAACCATCAACTAATCTGCTCCAACAATGATGTTCTTTTAGGGCATTCACTTGAATAGATCAATATAAACAACATTTCATTTGAAAAAGAGTTTCGATCACAAGAC
276	sf005160_AC	TTACCTGAAGCAACAACTCCATCTCTTGGACTGGGCTTGAAGGCTCTTACGTTGGCATATAATTTGCCATCAATGTCTGTGTTCTTCATTGCATCAGGCTCCTCGTCTTCAACTCCATCTGAGTTTCCATAAACTCCCTCTGACATCTTAACACACTTGTGGTCAAATACAGAAACTTCTACTTCTGACCTCAACTCTAATGTATGTC
277	sf000681_AT	TTAAAATAAATAAATAAAATAGTAACAAGAGGAATAAAATAAAATTCACAAGAATGGAGGAGTACCAGTACCAGATCAATGTGTAGAGGTATGAGGTATTGGAGGTAGATATGTACATGATGGCAAGGTAAAGTATGTAGTATTTGTGAATGCCTGTGGGTTTTGTGTGGGAGTATCAATGTAGTTTGTGTATGTGAGTGTGTGTGTATATGGTTTGTATATACAGTCTAGTAAATGTGCGTAGGGTCAGTGCAAGATAGAGTCAGTGCAGATAGTTGGGTCTCATTAATTGTCTATTTAGCAGTATTATGGCTGTGGGGGTAGAAGCTGTCTCGGAGCCTGTTCGCCTGAGAGCCCTCTCCAAAGTGTGCACAGTTCCTAAGTAATTTCAATGCAATT…
278	sf000020_CTa	GGATGCACTAGAGAAGGCCCTAATGCAATGATTGATAACATGCTTACACAGAGCCTCACAGAGTCTCACACTAGGTAAAGTGGTAGAGGTAGCGCTAGTGATTGGTGGAAAGGCGCTCTCAGATTATTCTTTGTGAGAGTGCCAGGTCAGTTGCATTAGGAACAGAGATCGCCCGGGAAAGGGAGAGCACACTAAAGCTCTTACCAAAGTTTAATTGAAAGTTCTGTGGGTATCCATCGTGCTCTTAACAAGACTTTAACAGTAGCAGGATGGAGAGGGATTGTCATGAGTTAACGGTTAAATAATAGGAGATGACAGTCAATCCATCAACCTTTCCTCTCAACTGTACTATGTTTCACTGAGTCATATGGGTGTTTAGCCACATAATGTAGCTCTGCT…
279	sf004521_CGa	GTGTCAGGAGAAACGTTACGTTTTTCATGAACATATAGTGATATAAATGATTTTGTATACATTTGATGTCAACAAAACTAATGGCACGAAATCACATGGATCCTGCAACTTTCCCACATGGTGTACACATGAAGGCCTGGAGTCCATTAAGTGACAGTAAATAGCTCAAAATTGCTTGCCTTTCTCCATAAACAAATCACTGAGTTTATATCAGACAGAAACAGCTTGGGAAAACGAAACAGG
280	sf006410_AGa	GGGGGAGCATTCTGTTCCACAAGGCTACCAAAAAGAAGACACTGGCTGTCATTGGCGACCCCTCCCACCCTCTCACCCTCCGTTGGAGAGGCTTCCCTCTGGCCGGCGCTTCAGAATGCCCATGGCCAAGAAGAACGGGTTCAAACATTCATTAGTTCTTTGTGCTGTTGGACTACTAAATGCAAAGTAAATTGTATCGGTATATGTACTTATCTATCTGGTGCAGTTGGGACAGTGGTCATTTGTTAATGAATGTATTAATGTCCTCTATGTTGTTAGTGGATGCGACATGATGGACTGACTGGTTTAAATGTGTATGCTGTGAAAATGTATGTGATTCTTTTAATGAAGGTGATGCCAAAGAAAAATGTCCATCCTGGATGGACAATAAAGTTTTAT…
